# Supplementary material for: A single-cell survey of cellular hierarchy in acute myeloid leukemia
Source: PubMed Central journal article supplement (PMC7517826; doi:10.1186/s13045-020-00941-y), 2020-09-25

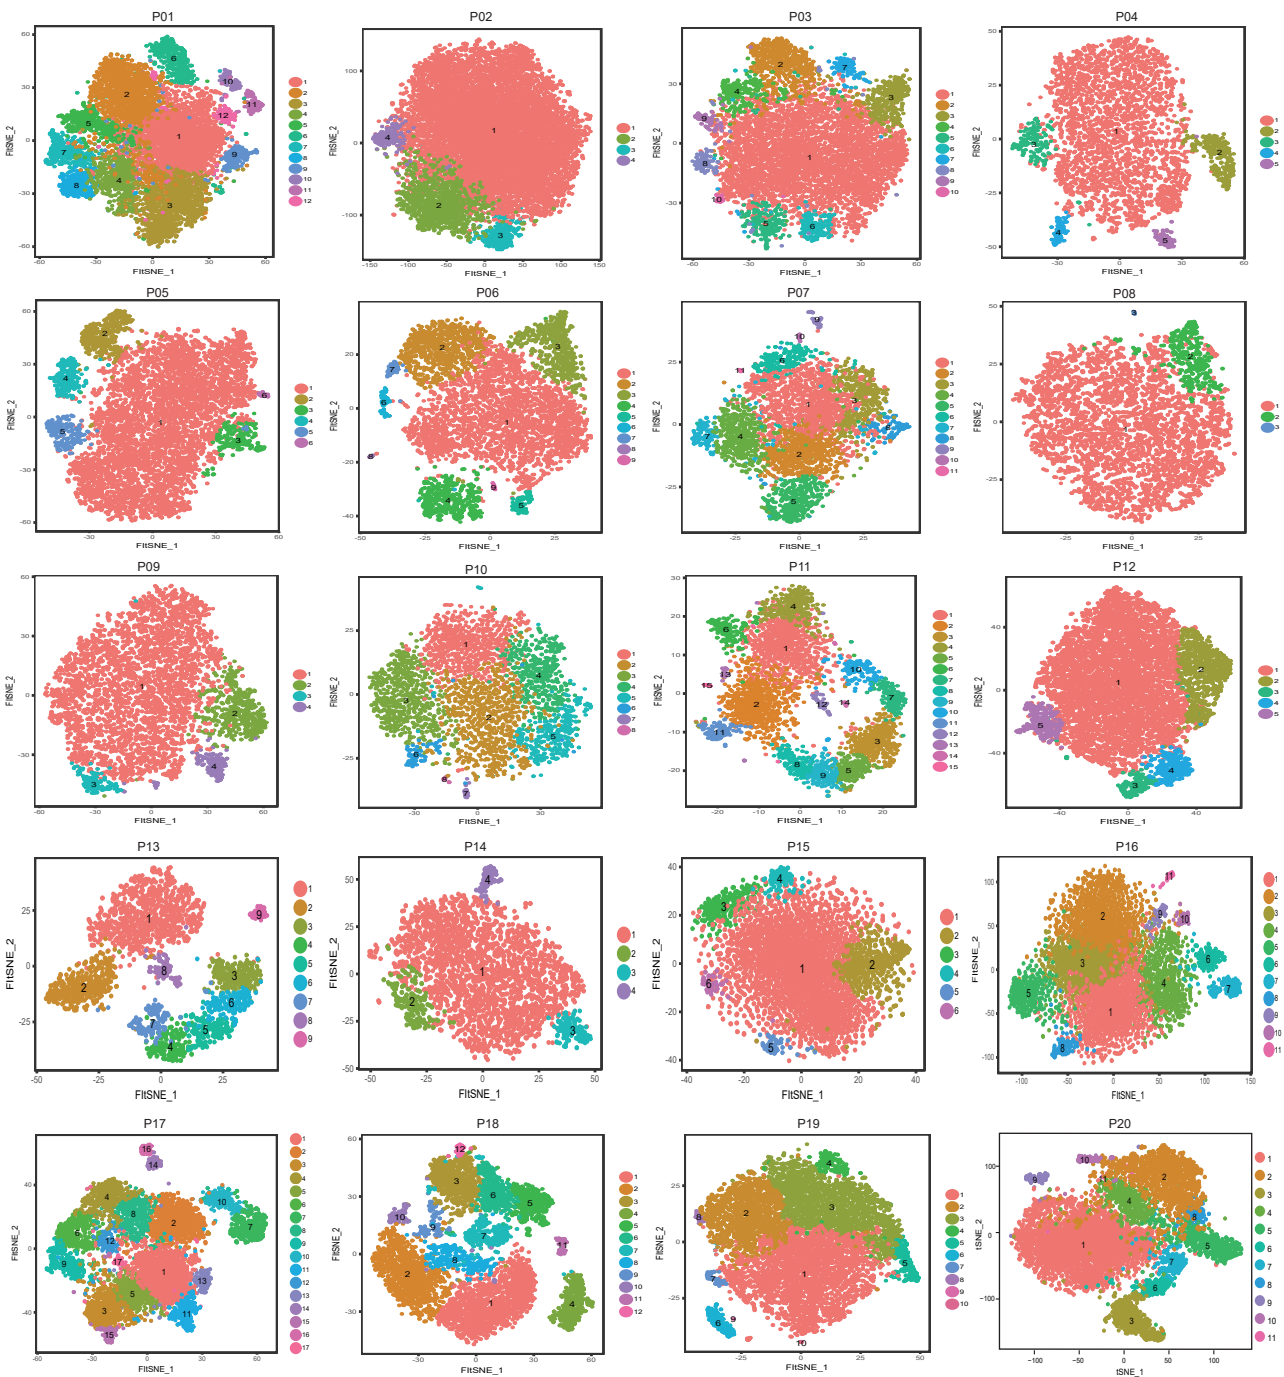

Supplement: 13045_2020_941_MOESM3_ESM.pdf [file 13045_2020_941_MOESM3_ESM.pdf]
