# Supplementary material for: A single-cell survey of cellular hierarchy in acute myeloid leukemia
Source: PubMed Central journal article supplement (PMC7517826; doi:10.1186/s13045-020-00941-y), 2020-09-25

**A**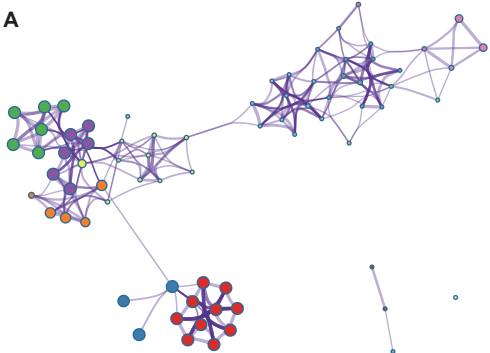

- Ribosome, cytoplasmic
- 60S ribosomal subunit, cytoplasmic
- 40S ribosomal subunit, cytoplasmic
- Ribosome biogenesis
- Ribosomal large subunit biogenesis
- Ribosomal small subunit biogenesis
- TNF-alpha/NF-kappa B signaling complex 6
- Regulation of translation
- Positive regulation of intrinsic apoptotic signaling pathway by p53 class mediator
- Maturation of LSU-rRNA
- Parvulin-associated pre-rRNP complex
- DNA damage response, detection of DNA damage
- Response to antibiotic
- Antimicrobial humoral immune response mediated by antimicrobial peptide
- PID MYC active pathway
- Positive regulation of cell cycle arrest

**B**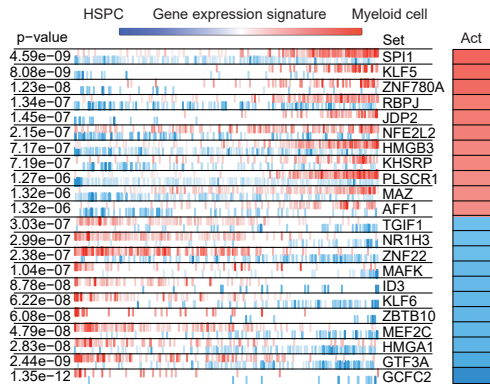**C**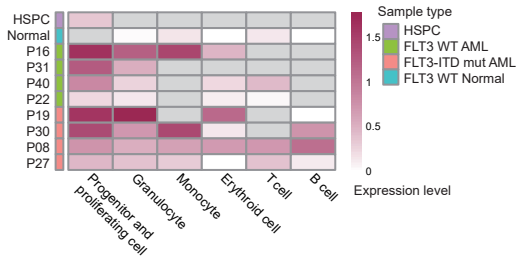

Supplement: 13045_2020_941_MOESM7_ESM.pdf [file 13045_2020_941_MOESM7_ESM.pdf]
