# Supplementary material for: A single-cell survey of cellular hierarchy in acute myeloid leukemia
Source: Springer Nature journal article supplement (doi:10.1186/s13045-020-00941-y), 2020-09-25
Supplement: MOESM2 [file 18417694]

**A**

Neutrophil

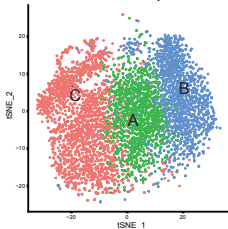**B**

DEFA3

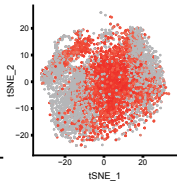

CTSG

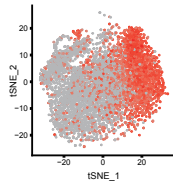

LTF

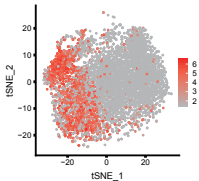**C**

| Cell type    | Marker gene                        |
|--------------|------------------------------------|
| Neutrophil A | DEFA3, BPI, CEACAM6, CD24, RNASE2  |
| Neutrophil B | CTSG, PRTN3, MPO, ELANE, AZU1      |
| Neutrophil C | MMP8, CAMP, LTF, PGLYRP1, LCN2     |
| Neutrophil D | Combination of Neutrophil A & B    |
| Neutrophil E | Combination of Neutrophil A & C    |
| Neutrophil F | Combination of Neutrophil A, B & C |
