# Supplementary material for: A single-cell survey of cellular hierarchy in acute myeloid leukemia
Source: Springer Nature journal article supplement (doi:10.1186/s13045-020-00941-y), 2020-09-25

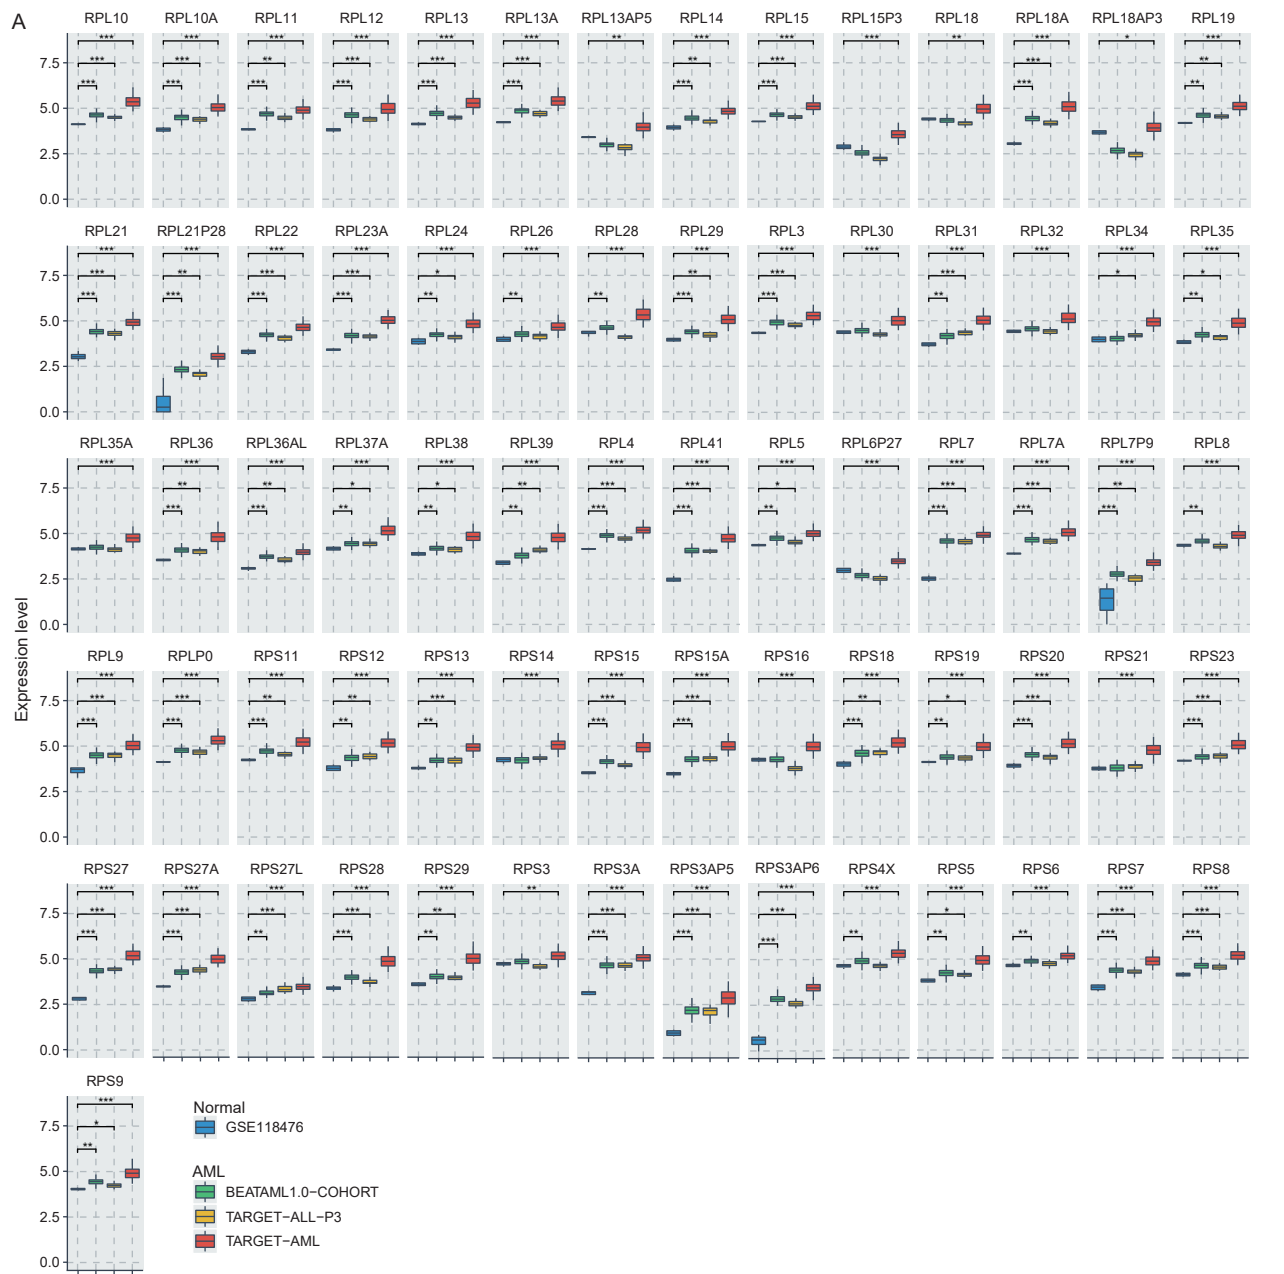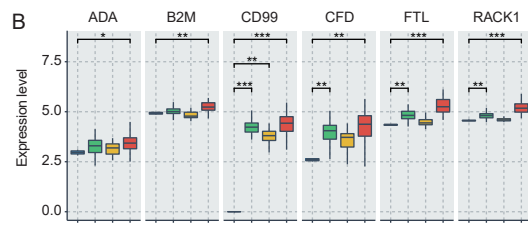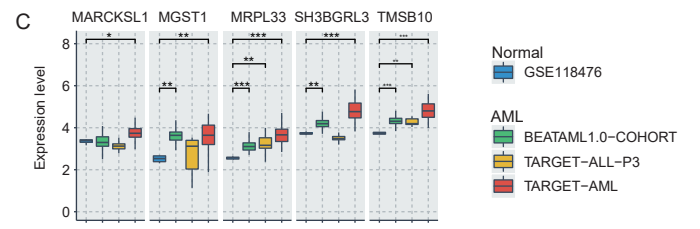

Supplement: MOESM6 [file 18417694]
