# Supplementary material for: A single-cell survey of cellular hierarchy in acute myeloid leukemia
Source: J Hematol Oncol. 2020 Sep 25;13:128. doi: 10.1186/s13045-020-00941-y (PMC7517826; doi:10.1186/s13045-020-00941-y)
Supplement: Supplementary file 18 — Additional file 18: Table S9. Marker genes in UMAP pre and post regimen. [file 13045_2020_941_MOESM18_ESM.xlsx]

## Sheet: P-extra1-Remission
Supplementary Table 9-1: Marker genes of P-extra 1 in UMAP pre and post regimen
	p_val	avg_logFC	pct.1	pct.2	p_val_adj	cluster	gene		cell type
MMP9	0	2.24828	0.591	0.168	0	1	MMP9		Neutrophil C_CD177 high
PGLYRP1	0	1.80198	0.813	0.297	0	1	PGLYRP1
MMP8	0	1.792	0.68	0.189	0	1	MMP8
CD177	0	1.79187	0.454	0.076	0	1	CD177
LCN2	0	1.78116	0.807	0.416	0	1	LCN2
LTF	0	1.7507	0.805	0.431	0	1	LTF
S100A12	0	1.71196	0.915	0.663	0	1	S100A12
PADI4	0	1.61731	0.549	0.128	0	1	PADI4
PLBD1	0	1.57679	0.547	0.123	0	1	PLBD1
IL1R2	0	1.56955	0.4	0.071	0	1	IL1R2
IFITM2	0	1.5327	0.761	0.379	0	1	IFITM2
FCGR3B	1.20463e-181	1.47883	0.304	0.085	2.04137e-177	1	FCGR3B
CRISP3	2.42021e-302	1.45416	0.408	0.096	4.10129e-298	1	CRISP3
S100A9	0	1.44477	1	0.94	0	1	S100A9
HP	1.63886e-293	1.4145	0.379	0.083	2.77721e-289	1	HP
ORM1	1.74608e-266	1.404	0.298	0.051	2.95891e-262	1	ORM1
FPR1	8.55204e-267	1.38826	0.374	0.09	1.44923e-262	1	FPR1
GCA	0	1.3779	0.754	0.324	0	1	GCA
CAMP	2.19904e-233	1.35166	0.811	0.58	3.72649e-229	1	CAMP
S100A8	0	1.25721	0.997	0.922	0	1	S100A8
FCN1	0	1.2335	0.799	0.338	0	1	FCN1
CDA	1.50767e-232	1.16954	0.439	0.147	2.5549e-228	1	CDA
RETN	1.10389e-248	1.16489	0.672	0.376	1.87065e-244	1	RETN
NCF2	2.01857e-172	1.13627	0.313	0.093	3.42067e-168	1	NCF2
PYGL	4.23448e-178	1.12093	0.324	0.097	7.17575e-174	1	PYGL
ITGAM	5.06891e-170	1.09769	0.293	0.081	8.58977e-166	1	ITGAM
TCN1	8.8803e-157	1.08653	0.307	0.096	1.50486e-152	1	TCN1
MSRB1	1.2932e-206	1.08289	0.467	0.185	2.19145e-202	1	MSRB1
S100P	0	1.08244	0.716	0.342	0	1	S100P
ALOX5AP	0	1.08207	0.791	0.412	0	1	ALOX5AP
ARG1	1.36607e-156	1.06795	0.29	0.085	2.31495e-152	1	ARG1
NCF1C	3.56198e-157	1.0657	0.288	0.084	6.03614e-153	1	NCF1C
SELL	3.2671e-131	1.0397	0.315	0.117	5.53643e-127	1	SELL
ANXA3	1.74089e-216	1.03549	0.53	0.23	2.9501e-212	1	ANXA3
LSP1	9.82011e-154	1.02657	0.362	0.134	1.66412e-149	1	LSP1
DUSP1	1.53201e-94	1.01105	0.293	0.126	2.59615e-90	1	DUSP1
APMAP	5.19529e-154	1.00603	0.385	0.154	8.80394e-150	1	APMAP
CORO1A	2.13863e-190	0.999066	0.501	0.221	3.62412e-186	1	CORO1A
ACTB	0	0.997015	0.966	0.793	0	1	ACTB
IFITM3	7.985e-86	0.994144	0.374	0.203	1.35314e-81	1	IFITM3
S100A6	0	0.987443	0.933	0.66	0	1	S100A6
MCEMP1	9.24876e-138	0.983627	0.283	0.089	1.56729e-133	1	MCEMP1
LITAF	3.45414e-115	0.97249	0.318	0.13	5.85339e-111	1	LITAF
LTA4H	3.34856e-111	0.961413	0.317	0.133	5.67447e-107	1	LTA4H
S100A11	4.91656e-294	0.96014	0.793	0.482	8.3316e-290	1	S100A11
CYSTM1	1.89857e-144	0.955003	0.394	0.167	3.21732e-140	1	CYSTM1
FGR	1.23017e-134	0.947903	0.3	0.103	2.08464e-130	1	FGR
CYBB	6.14756e-125	0.941736	0.309	0.114	1.04177e-120	1	CYBB
CAP1	1.20751e-160	0.935017	0.479	0.229	2.04624e-156	1	CAP1
BRI3	2.96666e-113	0.900771	0.305	0.119	5.0273e-109	1	BRI3
JUNB	8.47226e-89	0.892743	0.297	0.134	1.43571e-84	1	JUNB
CNN2	1.25396e-104	0.888999	0.287	0.113	2.12497e-100	1	CNN2
MYL12A	1.40171e-251	0.88765	0.735	0.447	2.37533e-247	1	MYL12A
STOM	6.37657e-100	0.879103	0.346	0.166	1.08057e-95	1	STOM
GPSM3	1.39196e-102	0.874451	0.29	0.115	2.35882e-98	1	GPSM3
MNDA	4.9481e-220	0.872863	0.677	0.365	8.38505e-216	1	MNDA
TSPO	2.38215e-195	0.833548	0.699	0.451	4.03679e-191	1	TSPO
RGS19	7.2841e-88	0.831131	0.26	0.106	1.23436e-83	1	RGS19
LCP1	4.46534e-155	0.827973	0.542	0.29	7.56697e-151	1	LCP1
FCER1G	6.47211e-164	0.81417	0.561	0.292	1.09676e-159	1	FCER1G
MYH9	4.51716e-84	0.811012	0.299	0.14	7.65478e-80	1	MYH9
EVI2B	3.16101e-88	0.805931	0.292	0.127	5.35664e-84	1	EVI2B
CSF3R	3.88712e-74	0.803469	0.356	0.198	6.58712e-70	1	CSF3R
ARPC5	3.30793e-119	0.800763	0.474	0.262	5.60562e-115	1	ARPC5
ITGB2	1.60288e-125	0.797313	0.472	0.243	2.71624e-121	1	ITGB2
RGL4	7.77162e-95	0.766272	0.387	0.2	1.31698e-90	1	RGL4
HCLS1	1.44989e-77	0.765407	0.273	0.123	2.45698e-73	1	HCLS1
VIM	2.20329e-165	0.741784	0.666	0.412	3.7337e-161	1	VIM
RAB27A	5.07297e-70	0.735228	0.305	0.156	8.59666e-66	1	RAB27A
HLA-E	1.24696e-83	0.713513	0.452	0.275	2.1131e-79	1	HLA-E
CCND3	2.59078e-52	0.698271	0.258	0.137	4.39033e-48	1	CCND3
PGD	1.99252e-56	0.680296	0.313	0.18	3.37653e-52	1	PGD
ACTG1	3.9499e-182	0.658069	0.816	0.619	6.69349e-178	1	ACTG1
HLA-C	7.1672e-132	0.642013	0.727	0.537	1.21455e-127	1	HLA-C
COTL1	1.4867e-56	0.640416	0.28	0.146	2.51937e-52	1	COTL1
FKBP1A	1.57945e-56	0.625309	0.38	0.246	2.67654e-52	1	FKBP1A
CAPG	4.70765e-51	0.622161	0.251	0.13	7.97758e-47	1	CAPG
SNX3	1.9728e-50	0.613761	0.364	0.238	3.3431e-46	1	SNX3
RAB31	1.35096e-44	0.600243	0.269	0.153	2.28934e-40	1	RAB31
CTSS	1.528e-66	0.593597	0.331	0.175	2.58935e-62	1	CTSS
FOS	6.26606e-41	0.586751	0.4	0.28	1.06185e-36	1	FOS
RTN3	4.99792e-38	0.584248	0.269	0.164	8.46948e-34	1	RTN3
MT-TV	6.79012e-80	0.571632	0.543	0.355	1.15065e-75	1	MT-TV
ACTR3	7.29256e-35	0.568188	0.257	0.159	1.2358e-30	1	ACTR3
ANXA1	1.10454e-85	0.566677	0.61	0.437	1.87175e-81	1	ANXA1
LDHA	5.67522e-35	0.565971	0.309	0.209	9.61723e-31	1	LDHA
CEACAM8	2.36426e-55	0.564899	0.37	0.224	4.00647e-51	1	CEACAM8
CD24	9.65799e-82	0.562704	0.496	0.301	1.63664e-77	1	CD24
RAC2	1.15256e-46	0.558785	0.375	0.249	1.95313e-42	1	RAC2
ITM2B	1.14409e-21	0.555079	0.325	0.257	1.93877e-17	1	ITM2B
ARPC2	2.80339e-75	0.542677	0.575	0.421	4.75063e-71	1	ARPC2
GSN	6.71939e-34	0.533616	0.281	0.179	1.13867e-29	1	GSN
ANP32A	3.1215e-27	0.527685	0.27	0.186	5.28969e-23	1	ANP32A
TALDO1	4.8325e-50	0.523327	0.477	0.358	8.18916e-46	1	TALDO1
TYROBP	6.30865e-116	0.522168	0.714	0.505	1.06906e-111	1	TYROBP
CFL1	3.90622e-115	0.510743	0.789	0.67	6.61948e-111	1	CFL1
MIR223	1.45771e-38	0.507531	0.351	0.236	2.47024e-34	1	MIR223
YWHAB	1.84905e-39	0.504415	0.444	0.346	3.1334e-35	1	YWHAB
CD37	1.75103e-23	0.472321	0.256	0.174	2.9673e-19	1	CD37
MYL6	4.05366e-135	0.470718	0.877	0.779	6.86933e-131	1	MYL6
MT-RNR2	1.89958e-195	0.470359	0.987	0.979	3.21902e-191	1	MT-RNR2
PFN1	2.30374e-94	0.46256	0.767	0.648	3.90391e-90	1	PFN1
PSAP	1.71927e-35	0.459282	0.421	0.316	2.91347e-31	1	PSAP
TMSB4X	3.36161e-271	0.456708	1	0.96	5.69658e-267	1	TMSB4X
GRN	6.75965e-38	0.448702	0.398	0.276	1.14549e-33	1	GRN
LST1	4.25407e-38	0.440813	0.433	0.316	7.20894e-34	1	LST1
MYL12B	1.07415e-29	0.422995	0.451	0.37	1.82025e-25	1	MYL12B
GLRX	2.6078e-21	0.413624	0.34	0.264	4.41918e-17	1	GLRX
EMB	4.05693e-23	0.406789	0.321	0.237	6.87488e-19	1	EMB
HLA-B	4.15151e-80	0.397195	0.81	0.694	7.03516e-76	1	HLA-B
CAPZB	2.89448e-14	0.395987	0.251	0.193	4.90498e-10	1	CAPZB
ARHGDIB	2.86461e-69	0.388539	0.745	0.632	4.85437e-65	1	ARHGDIB
LAPTM5	1.14641e-30	0.387942	0.482	0.387	1.94271e-26	1	LAPTM5
PKM	8.55977e-18	0.369434	0.303	0.233	1.45054e-13	1	PKM
BLOC1S1	7.08355e-16	0.369177	0.289	0.225	1.20038e-11	1	BLOC1S1
ARPC3	8.83844e-29	0.362211	0.535	0.473	1.49776e-24	1	ARPC3
MT-TL1	3.41317e-24	0.360137	0.388	0.295	5.78396e-20	1	MT-TL1
HMGB2	6.87076e-25	0.34981	0.492	0.411	1.16432e-20	1	HMGB2
PGK1	2.94415e-13	0.346945	0.345	0.293	4.98915e-09	1	PGK1
RHOA	3.10281e-15	0.342331	0.374	0.321	5.25802e-11	1	RHOA
CTSD	2.00113e-18	0.33401	0.369	0.296	3.39112e-14	1	CTSD
CALM1	2.12685e-20	0.325394	0.448	0.38	3.60416e-16	1	CALM1
GMFG	4.96078e-38	0.308195	0.663	0.576	8.40653e-34	1	GMFG
TKT	3.27745e-12	0.297139	0.333	0.281	5.55397e-08	1	TKT
PRR13	1.84816e-08	0.292013	0.259	0.216	0.00031319	1	PRR13
DAZAP2	1.46183e-09	0.288785	0.306	0.262	2.47721e-05	1	DAZAP2
OAZ1	5.03132e-36	0.282824	0.716	0.648	8.52607e-32	1	OAZ1
ARPC1B	1.54037e-17	0.275021	0.403	0.329	2.61032e-13	1	ARPC1B
MT-RNR1	1.17634e-33	0.272662	0.74	0.687	1.99342e-29	1	MT-RNR1
CTSG	0	2.42863	0.944	0.397	0	2	CTSG		Neutrophil B
PRTN3	0	2.19792	0.963	0.505	0	2	PRTN3
CST7	0	1.98096	0.882	0.291	0	2	CST7
ELANE	0	1.84312	0.981	0.674	0	2	ELANE
MPO	0	1.7302	0.786	0.355	0	2	MPO
AZU1	0	1.55714	0.992	0.662	0	2	AZU1
NUCB2	0	1.48216	0.779	0.274	0	2	NUCB2
PRSS57	0	1.31287	0.424	0.068	0	2	PRSS57
DEFA4	7.46955e-138	1.24563	0.757	0.525	1.26579e-133	2	DEFA4
RNASE3	6.46914e-271	1.20947	0.707	0.251	1.09626e-266	2	RNASE3
RP11-84C10.2	2.04707e-157	1.12069	0.256	0.048	3.46897e-153	2	RP11-84C10.2
P4HB	9.05145e-196	1.08217	0.584	0.212	1.53386e-191	2	P4HB
HSPA5	9.58909e-154	1.07635	0.43	0.138	1.62497e-149	2	HSPA5
SRGN	0	1.05982	0.999	0.896	0	2	SRGN
CALR	1.18797e-141	0.963901	0.384	0.116	2.01313e-137	2	CALR
HSP90B1	2.66352e-139	0.918273	0.464	0.164	4.5136e-135	2	HSP90B1
PDIA6	1.20088e-120	0.902928	0.374	0.123	2.03501e-116	2	PDIA6
PLAC8	1.01144e-156	0.896927	0.709	0.345	1.71399e-152	2	PLAC8
RNASE2	1.18151e-237	0.894402	0.913	0.5	2.00219e-233	2	RNASE2
SERPINB1	8.0765e-170	0.846263	0.734	0.37	1.36864e-165	2	SERPINB1
CLEC11A	1.72937e-122	0.846224	0.393	0.128	2.93058e-118	2	CLEC11A
MGST1	2.00849e-113	0.818366	0.335	0.101	3.40359e-109	2	MGST1
MS4A3	2.15334e-131	0.797641	0.603	0.264	3.64905e-127	2	MS4A3
IFI6	2.81257e-79	0.742257	0.323	0.12	4.76618e-75	2	IFI6
PPIB	7.02169e-81	0.703489	0.404	0.174	1.1899e-76	2	PPIB
TMEM258	1.99582e-92	0.696023	0.586	0.306	3.38211e-88	2	TMEM258
CAT	5.06943e-79	0.672009	0.494	0.244	8.59066e-75	2	CAT
SSR4	1.91241e-101	0.64838	0.564	0.265	3.24078e-97	2	SSR4
OSTC	3.64289e-55	0.647016	0.268	0.11	6.17325e-51	2	OSTC
RPS26	5.41552e-111	0.637279	0.814	0.532	9.17714e-107	2	RPS26
VAMP8	5.72064e-92	0.635414	0.602	0.301	9.69419e-88	2	VAMP8
ABRACL	5.30562e-61	0.634018	0.34	0.15	8.99091e-57	2	ABRACL
GSTP1	2.52666e-113	0.630975	0.703	0.363	4.28168e-109	2	GSTP1
LRRC75A-AS1	5.2615e-79	0.61697	0.66	0.401	8.91614e-75	2	LRRC75A-AS1
SERF2	7.57546e-136	0.598289	0.94	0.742	1.28374e-131	2	SERF2
RNASEH2C	7.7218e-44	0.587215	0.335	0.171	1.30854e-39	2	RNASEH2C
FKBP2	1.8608e-55	0.583567	0.254	0.098	3.1533e-51	2	FKBP2
SEC61G	6.84546e-54	0.574254	0.365	0.175	1.16003e-49	2	SEC61G
CNIH4	1.3508e-45	0.560314	0.288	0.132	2.28906e-41	2	CNIH4
SLPI	1.30401e-60	0.55182	0.472	0.243	2.20977e-56	2	SLPI
CANX	2.46295e-48	0.546388	0.288	0.128	4.17371e-44	2	CANX
RPS14	5.58309e-183	0.545756	0.988	0.885	9.4611e-179	2	RPS14
CEACAM6	7.20487e-56	0.544529	0.364	0.168	1.22094e-51	2	CEACAM6
LSM7	7.69277e-46	0.541468	0.275	0.123	1.30362e-41	2	LSM7
RPL7	1.58454e-139	0.537551	0.959	0.769	2.68516e-135	2	RPL7
PSMB7	9.86055e-46	0.53362	0.353	0.178	1.67097e-41	2	PSMB7
NDUFB9	1.1487e-52	0.528241	0.494	0.274	1.94659e-48	2	NDUFB9
MTDH	9.90149e-38	0.516437	0.264	0.127	1.67791e-33	2	MTDH
SEC61B	1.82566e-49	0.512583	0.452	0.249	3.09376e-45	2	SEC61B
SHFM1	2.37852e-45	0.512141	0.436	0.245	4.03064e-41	2	SHFM1
RPS4X	1.04351e-94	0.507742	0.837	0.585	1.76833e-90	2	RPS4X
NDUFB2	1.21003e-47	0.507037	0.437	0.239	2.05052e-43	2	NDUFB2
PTMA	2.61312e-87	0.500354	0.868	0.618	4.42819e-83	2	PTMA
RPS19	1.25109e-116	0.487792	0.969	0.789	2.1201e-112	2	RPS19
RPS24	6.88786e-89	0.460697	0.89	0.655	1.16722e-84	2	RPS24
LSM5	1.02346e-28	0.456613	0.301	0.171	1.73436e-24	2	LSM5
TMBIM6	8.48647e-36	0.454256	0.527	0.348	1.43812e-31	2	TMBIM6
NAP1L1	4.60176e-33	0.453084	0.297	0.157	7.79814e-29	2	NAP1L1
HNRNPU	5.28037e-28	0.432872	0.256	0.136	8.94812e-24	2	HNRNPU
RPLP0	1.23294e-74	0.429588	0.853	0.605	2.08933e-70	2	RPLP0
GSTO1	1.89608e-29	0.428374	0.32	0.181	3.2131e-25	2	GSTO1
RPS6	7.47165e-112	0.423194	0.975	0.815	1.26615e-107	2	RPS6
GAS5	1.17004e-42	0.415746	0.481	0.281	1.98274e-38	2	GAS5
TPP1	2.39838e-33	0.410144	0.29	0.146	4.06429e-29	2	TPP1
COMMD6	1.12888e-29	0.402804	0.494	0.323	1.913e-25	2	COMMD6
ATP5G1	6.43445e-26	0.400009	0.292	0.167	1.09038e-21	2	ATP5G1
XBP1	1.97425e-39	0.398784	0.255	0.115	3.34556e-35	2	XBP1
GNAS	9.92313e-31	0.397097	0.334	0.187	1.68157e-26	2	GNAS
EEF1A1	9.08417e-91	0.394502	0.949	0.794	1.5394e-86	2	EEF1A1
HSP90AB1	1.19291e-22	0.388303	0.271	0.156	2.02151e-18	2	HSP90AB1
RPL36A	2.80282e-60	0.385492	0.817	0.561	4.74967e-56	2	RPL36A
COX6B1	3.10631e-29	0.379384	0.545	0.379	5.26396e-25	2	COX6B1
RPL34	4.55581e-97	0.378206	0.984	0.86	7.72028e-93	2	RPL34
SNRPD1	3.88917e-24	0.377745	0.314	0.186	6.59059e-20	2	SNRPD1
HINT1	1.287e-28	0.374722	0.496	0.329	2.18095e-24	2	HINT1
TXN	1.14229e-37	0.36958	0.71	0.519	1.93572e-33	2	TXN
H2AFZ	1.35646e-30	0.36803	0.593	0.419	2.29866e-26	2	H2AFZ
ATP5J	5.49854e-34	0.367778	0.513	0.325	9.31782e-30	2	ATP5J
UQCR10	2.82624e-27	0.367749	0.468	0.31	4.78934e-23	2	UQCR10
MRPL51	4.06396e-17	0.363439	0.331	0.222	6.88679e-13	2	MRPL51
HMGN1	1.21454e-24	0.361216	0.41	0.265	2.05817e-20	2	HMGN1
ENO1	2.64761e-35	0.358396	0.548	0.342	4.48665e-31	2	ENO1
RPL7A	4.44423e-47	0.358308	0.782	0.555	7.53119e-43	2	RPL7A
HSP90AA1	1.22175e-24	0.357519	0.365	0.225	2.07037e-20	2	HSP90AA1
RPS17	3.79464e-56	0.353412	0.868	0.67	6.4304e-52	2	RPS17
SNRPD2	1.426e-27	0.352932	0.441	0.281	2.4165e-23	2	SNRPD2
TMSB4XP4	9.57021e-26	0.349147	0.488	0.343	1.62177e-21	2	TMSB4XP4
RPL31	2.81057e-74	0.348849	0.945	0.787	4.7628e-70	2	RPL31
NDUFC2	5.51386e-18	0.339204	0.263	0.162	9.34378e-14	2	NDUFC2
NDUFA4	3.25075e-24	0.336945	0.531	0.374	5.50873e-20	2	NDUFA4
NEAT1	3.44336e-12	0.333489	0.353	0.261	5.83511e-08	2	NEAT1
RPL27A	2.18476e-71	0.331115	0.943	0.782	3.70229e-67	2	RPL27A
RPS8	6.45354e-52	0.331065	0.844	0.631	1.09362e-47	2	RPS8
HSBP1	4.80788e-21	0.330147	0.327	0.2	8.14743e-17	2	HSBP1
EEF2	5.3229e-22	0.324899	0.401	0.262	9.02019e-18	2	EEF2
RPL5	6.82707e-42	0.323404	0.772	0.585	1.15692e-37	2	RPL5
EEF1B2	6.44887e-37	0.321359	0.632	0.421	1.09283e-32	2	EEF1B2
RPL9	5.06119e-45	0.309303	0.825	0.613	8.57669e-41	2	RPL9
PABPC1	3.04329e-30	0.308146	0.676	0.513	5.15716e-26	2	PABPC1
MT-CO2	1.04746e-68	0.307313	0.972	0.868	1.77503e-64	2	MT-CO2
NDUFA3	1.59771e-19	0.304203	0.362	0.235	2.70749e-15	2	NDUFA3
NDUFS5	4.35679e-19	0.294493	0.386	0.255	7.38301e-15	2	NDUFS5
NAA38	2.71354e-17	0.293015	0.284	0.177	4.59836e-13	2	NAA38
RPL35	2.02772e-39	0.292325	0.818	0.616	3.43618e-35	2	RPL35
RPL15	2.55564e-49	0.292097	0.904	0.719	4.33079e-45	2	RPL15
LSM3	8.89175e-12	0.290341	0.282	0.197	1.5068e-07	2	LSM3
H2AFV	1.68835e-16	0.284854	0.354	0.239	2.86107e-12	2	H2AFV
AIF1	9.011e-34	0.284311	0.545	0.339	1.527e-29	2	AIF1
PRDX5	1.59219e-18	0.284309	0.401	0.266	2.69813e-14	2	PRDX5
ATP5I	3.53164e-18	0.284242	0.443	0.31	5.98472e-14	2	ATP5I
EIF3E	2.60093e-17	0.283733	0.263	0.16	4.40753e-13	2	EIF3E
MT-ND3	2.17268e-24	0.281372	0.81	0.706	3.68182e-20	2	MT-ND3
RPLP1	1.21888e-57	0.280944	0.97	0.848	2.06552e-53	2	RPLP1
NDUFB8	1.72855e-14	0.275268	0.288	0.19	2.9292e-10	2	NDUFB8
RPS21	4.09403e-35	0.274064	0.8	0.591	6.93774e-31	2	RPS21
RPL26	5.03458e-38	0.271452	0.829	0.635	8.53159e-34	2	RPL26
EIF2S2	5.25016e-12	0.271257	0.265	0.182	8.89693e-08	2	EIF2S2
NPM1	2.6908e-18	0.268614	0.433	0.295	4.55983e-14	2	NPM1
RACK1	1.6912e-24	0.268275	0.677	0.514	2.86592e-20	2	RACK1
RPL36AL	4.57057e-23	0.268239	0.594	0.432	7.74528e-19	2	RPL36AL
RPS3A	4.10499e-42	0.266626	0.894	0.717	6.95632e-38	2	RPS3A
ROMO1	2.34919e-16	0.266065	0.429	0.301	3.98094e-12	2	ROMO1
RPS23	2.59194e-40	0.264801	0.874	0.701	4.39231e-36	2	RPS23
DAD1	1.05139e-13	0.264589	0.259	0.168	1.78168e-09	2	DAD1
NDUFA12	3.59707e-13	0.263796	0.253	0.165	6.0956e-09	2	NDUFA12
RPL12	8.59324e-26	0.262924	0.706	0.526	1.45621e-21	2	RPL12
UQCRQ	6.81866e-19	0.262508	0.487	0.342	1.15549e-14	2	UQCRQ
UQCR11	3.23548e-19	0.260588	0.516	0.37	5.48284e-15	2	UQCR11
RPL36	2.05777e-36	0.260087	0.827	0.636	3.4871e-32	2	RPL36
MALAT1	4.01174e-18	0.259179	0.449	0.313	6.7983e-14	2	MALAT1
RPL39	1.45349e-29	0.255846	0.831	0.675	2.46308e-25	2	RPL39
RPL32	1.80392e-43	0.254465	0.926	0.75	3.05692e-39	2	RPL32
RPL7P9	1.32976e-22	0.251748	0.369	0.226	2.25341e-18	2	RPL7P9
RPL3	1.41656e-34	0.251321	0.814	0.631	2.4005e-30	2	RPL3
CTSA	3.3211e-14	0.250011	0.26	0.166	5.62793e-10	2	CTSA
CFD	1.57825e-157	1.43816	0.52	0.199	2.6745e-153	3	CFD		AML progenitor cell
LGALS1	2.01263e-136	1.09998	0.591	0.268	3.4106e-132	3	LGALS1
MT-TW	3.53093e-93	1.0925	0.472	0.233	5.98351e-89	3	MT-TW
HLA-DRA	4.32023e-110	1.05074	0.503	0.226	7.32106e-106	3	HLA-DRA
GPX1	4.00103e-70	0.960461	0.427	0.22	6.78014e-66	3	GPX1
RPL13P12	4.22092e-67	0.939703	0.462	0.265	7.15277e-63	3	RPL13P12
CST3	5.40398e-81	0.923517	0.439	0.205	9.15758e-77	3	CST3
RP11-543P15.1	1.36064e-71	0.904404	0.518	0.319	2.30575e-67	3	RP11-543P15.1
RP11-475C16.1	9.81974e-43	0.874677	0.348	0.201	1.66405e-38	3	RP11-475C16.1
RPL18AP3	1.32362e-42	0.86276	0.392	0.247	2.24301e-38	3	RPL18AP3
RPL13AP5	3.1387e-41	0.859709	0.34	0.196	5.31884e-37	3	RPL13AP5
RP11-234A1.1	2.09811e-43	0.851803	0.362	0.213	3.55545e-39	3	RP11-234A1.1
RPL10AP6	1.01714e-37	0.847588	0.304	0.169	1.72364e-33	3	RPL10AP6
RPS2P46	4.93108e-40	0.840801	0.383	0.243	8.35621e-36	3	RPS2P46
AC016739.2	1.70938e-37	0.829472	0.286	0.154	2.89672e-33	3	AC016739.2
MT-TP	6.607e-52	0.82643	0.451	0.28	1.11962e-47	3	MT-TP
AC007969.5	5.86182e-39	0.818472	0.342	0.203	9.93344e-35	3	AC007969.5
CD74	2.78115e-79	0.814422	0.582	0.346	4.71293e-75	3	CD74
RPS3AP26	8.88844e-34	0.788105	0.325	0.198	1.50623e-29	3	RPS3AP26
RP11-466H18.1	1.77877e-37	0.786001	0.373	0.238	3.0143e-33	3	RP11-466H18.1
HLA-DRB1	3.05755e-47	0.766475	0.321	0.158	5.18133e-43	3	HLA-DRB1
RP11-632C17--A.1	2.60845e-30	0.766463	0.308	0.189	4.42028e-26	3	RP11-632C17--A.1
RPL7P1	5.20184e-33	0.764406	0.294	0.169	8.81504e-29	3	RPL7P1
RP4-765C7.2	1.03136e-39	0.756876	0.325	0.182	1.74774e-35	3	RP4-765C7.2
RPL15P3	1.00664e-24	0.754041	0.291	0.189	1.70585e-20	3	RPL15P3
RPS3AP6	7.91517e-29	0.752929	0.282	0.168	1.3413e-24	3	RPS3AP6
RPL9P9	3.32996e-48	0.752145	0.533	0.391	5.64295e-44	3	RPL9P9
RP11-761N21.2	1.19988e-26	0.745279	0.262	0.154	2.03331e-22	3	RP11-761N21.2
RPL13AP25	1.84713e-25	0.741511	0.255	0.152	3.13014e-21	3	RPL13AP25
RP11-864N7.2	2.63536e-24	0.714885	0.277	0.174	4.46588e-20	3	RP11-864N7.2
MTATP6P1	8.36733e-40	0.707324	0.46	0.32	1.41793e-35	3	MTATP6P1
CYBA	2.20974e-55	0.699539	0.557	0.376	3.74463e-51	3	CYBA
CSTA	9.94615e-56	0.694526	0.662	0.506	1.68547e-51	3	CSTA
RPL41	3.36887e-59	0.691232	0.716	0.601	5.70888e-55	3	RPL41
MTCO1P12	1.31818e-25	0.688922	0.32	0.213	2.23379e-21	3	MTCO1P12
RP11-425L10.1	1.71124e-23	0.686825	0.288	0.187	2.89987e-19	3	RP11-425L10.1
RPL7P9	5.60484e-22	0.684403	0.327	0.233	9.49796e-18	3	RPL7P9
MT2A	1.57755e-21	0.668741	0.269	0.17	2.67331e-17	3	MT2A
ZFAS1	1.34046e-23	0.659582	0.334	0.23	2.27155e-19	3	ZFAS1
RPS18	1.06919e-61	0.649081	0.805	0.719	1.81186e-57	3	RPS18
RPL18A	8.5884e-52	0.648541	0.685	0.572	1.45539e-47	3	RPL18A
PYCARD	9.20553e-24	0.631337	0.291	0.183	1.55997e-19	3	PYCARD
RPL13	6.41926e-72	0.617012	0.833	0.746	1.08781e-67	3	RPL13
RPL29	3.35212e-33	0.609808	0.552	0.449	5.68051e-29	3	RPL29
RPL23A	9.68698e-44	0.600337	0.639	0.534	1.64156e-39	3	RPL23A
MRPL33	1.17342e-15	0.597097	0.257	0.178	1.98847e-11	3	MRPL33
RPL22	3.41038e-33	0.572591	0.525	0.412	5.77923e-29	3	RPL22
SNHG5	4.36158e-17	0.556128	0.344	0.263	7.39114e-13	3	SNHG5
MT-TL1	3.09273e-19	0.547557	0.392	0.306	5.24094e-15	3	MT-TL1
TMSB10	6.09981e-79	0.547114	0.857	0.716	1.03367e-74	3	TMSB10
RPS2	1.09188e-39	0.54711	0.701	0.604	1.85029e-35	3	RPS2
RPL9	1.70191e-49	0.535131	0.739	0.627	2.88405e-45	3	RPL9
TYROBP	2.87596e-43	0.524547	0.678	0.534	4.87361e-39	3	TYROBP
RPL36	3.92205e-46	0.519154	0.746	0.649	6.6463e-42	3	RPL36
RPL10A	2.31018e-28	0.518215	0.573	0.478	3.91483e-24	3	RPL10A
SNHG6	1.4012e-10	0.51251	0.269	0.213	2.37447e-06	3	SNHG6
RPL39	2.00764e-43	0.510122	0.758	0.686	3.40215e-39	3	RPL39
RPL37	1.38017e-36	0.510045	0.74	0.687	2.33883e-32	3	RPL37
RPL26	2.52377e-40	0.49761	0.742	0.648	4.27679e-36	3	RPL26
RPL10	1.69969e-50	0.497279	0.812	0.729	2.88029e-46	3	RPL10
RPL19	1.11804e-41	0.494092	0.782	0.708	1.89463e-37	3	RPL19
RPL12	3.05794e-32	0.492261	0.639	0.536	5.18199e-28	3	RPL12
RPL31	4.42957e-49	0.488325	0.858	0.799	7.50635e-45	3	RPL31
RPS29	2.81523e-50	0.486944	0.84	0.812	4.77068e-46	3	RPS29
ATP5G2	2.54389e-10	0.485647	0.336	0.289	4.31087e-06	3	ATP5G2
GAS5	1.45848e-12	0.482795	0.362	0.297	2.47154e-08	3	GAS5
RPL32	6.62994e-54	0.479658	0.845	0.762	1.12351e-49	3	RPL32
RPS10	5.45268e-24	0.47404	0.559	0.475	9.24011e-20	3	RPS10
RPL27A	3.74667e-43	0.473096	0.842	0.796	6.34911e-39	3	RPL27A
PFDN5	8.19364e-20	0.4702	0.519	0.464	1.38849e-15	3	PFDN5
RPL37A	5.1274e-29	0.468993	0.699	0.638	8.6889e-25	3	RPL37A
RPL36A	1.49772e-28	0.468842	0.664	0.582	2.53804e-24	3	RPL36A
S100A4	8.53168e-36	0.452408	0.63	0.488	1.44578e-31	3	S100A4
RPS27	6.51077e-68	0.440862	0.944	0.901	1.10331e-63	3	RPS27
RPS23	5.26053e-35	0.440205	0.786	0.714	8.91449e-31	3	RPS23
RPL38	1.46427e-25	0.438125	0.636	0.564	2.48135e-21	3	RPL38
RPL14	6.24507e-17	0.436761	0.558	0.5	1.05829e-12	3	RPL14
RPS9	8.58969e-21	0.436415	0.631	0.579	1.45561e-16	3	RPS9
RPS15	4.69404e-30	0.433006	0.748	0.69	7.95452e-26	3	RPS15
RPL13A	4.16115e-32	0.431539	0.745	0.684	7.05148e-28	3	RPL13A
RPS8	2.10809e-25	0.429417	0.715	0.649	3.57237e-21	3	RPS8
RPS3A	2.32885e-35	0.423855	0.801	0.731	3.94647e-31	3	RPS3A
SH3BGRL3	6.10014e-27	0.417972	0.628	0.529	1.03373e-22	3	SH3BGRL3
RPLP1	1.89379e-42	0.417121	0.891	0.859	3.20922e-38	3	RPLP1
RPS25	2.8201e-28	0.412488	0.719	0.663	4.77893e-24	3	RPS25
MT-RNR1	1.783e-32	0.408977	0.757	0.691	3.02147e-28	3	MT-RNR1
RPL3P4	4.97184e-06	0.3966	0.273	0.242	0.0842528	3	RPL3P4
AIF1	1.24617e-14	0.396032	0.429	0.355	2.11176e-10	3	AIF1
RPS13	7.43417e-24	0.394431	0.706	0.644	1.25979e-19	3	RPS13
RPL30	3.50791e-35	0.392834	0.799	0.74	5.9445e-31	3	RPL30
RPL15	5.25319e-29	0.392385	0.787	0.736	8.90206e-25	3	RPL15
RPL7A	1.26929e-14	0.378878	0.615	0.577	2.15094e-10	3	RPL7A
RPS11	1.20284e-25	0.377594	0.736	0.679	2.03834e-21	3	RPS11
RPS27A	1.67184e-33	0.372195	0.833	0.781	2.8331e-29	3	RPS27A
ALDOA	2.66063e-07	0.365938	0.328	0.292	0.00450871	3	ALDOA
RPL28	4.37615e-21	0.356372	0.722	0.685	7.41582e-17	3	RPL28
MT-ND5	1.04775e-06	0.355568	0.37	0.346	0.0177551	3	MT-ND5
RPS15A	3.31839e-24	0.354752	0.73	0.682	5.62334e-20	3	RPS15A
RPS21	6.67453e-17	0.354569	0.659	0.61	1.13107e-12	3	RPS21
RPLP2	2.64481e-35	0.351091	0.851	0.796	4.48189e-31	3	RPLP2
RPS3	1.26054e-24	0.348386	0.799	0.738	2.13611e-20	3	RPS3
RPS24	8.39002e-21	0.344453	0.736	0.676	1.42177e-16	3	RPS24
RPS5	1.61245e-09	0.343633	0.48	0.442	2.73246e-05	3	RPS5
UQCRB	8.91992e-08	0.342799	0.368	0.336	0.00151157	3	UQCRB
MT-ND4	7.88428e-40	0.337395	0.944	0.913	1.33607e-35	3	MT-ND4
RPS19	9.35004e-36	0.336064	0.893	0.801	1.58446e-31	3	RPS19
VAMP8	2.34421e-06	0.33466	0.36	0.333	0.0397249	3	VAMP8
RPL23	2.01124e-17	0.33384	0.634	0.572	3.40825e-13	3	RPL23
HINT1	2.97257e-06	0.333114	0.369	0.346	0.0503732	3	HINT1
RPS20	3.45272e-21	0.331498	0.753	0.698	5.85099e-17	3	RPS20
FAU	1.65749e-16	0.329644	0.645	0.597	2.80878e-12	3	FAU
RPL18	9.32977e-09	0.316998	0.537	0.528	0.000158102	3	RPL18
RPL35A	1.44732e-22	0.316855	0.785	0.724	2.45262e-18	3	RPL35A
RPL35	1.03074e-19	0.315141	0.706	0.633	1.74669e-15	3	RPL35
RPS12	5.91027e-25	0.309047	0.795	0.743	1.00155e-20	3	RPS12
RPL11	3.54965e-21	0.307292	0.774	0.725	6.01524e-17	3	RPL11
RPS6	3.99675e-29	0.305713	0.886	0.827	6.77289e-25	3	RPS6
RPL21	6.4568e-27	0.299568	0.881	0.841	1.09417e-22	3	RPL21
HCST	3.29166e-05	0.296716	0.336	0.31	0.557804	3	HCST
COX7C	4.14549e-07	0.29524	0.468	0.452	0.00702495	3	COX7C
RPS7	4.06021e-05	0.294559	0.473	0.474	0.688042	3	RPS7
UBA52	1.1481e-12	0.293712	0.627	0.609	1.94558e-08	3	UBA52
COX5B	0.0040905	0.293476	0.311	0.31	1	3	COX5B
NACA	3.39251e-10	0.291156	0.57	0.541	5.74894e-06	3	NACA
EEF1B2	6.80095e-06	0.291007	0.455	0.445	0.115249	3	EEF1B2
RPL6	3.28484e-10	0.290673	0.569	0.532	5.56649e-06	3	RPL6
RPS28	5.44566e-15	0.290053	0.634	0.574	9.22822e-11	3	RPS28
RPS17	7.38331e-18	0.283457	0.749	0.687	1.25118e-13	3	RPS17
RPL34	1.45917e-32	0.277731	0.916	0.87	2.47271e-28	3	RPL34
RPL7	1.29424e-22	0.274646	0.843	0.785	2.19322e-18	3	RPL7
RPL8	4.11066e-06	0.27394	0.602	0.608	0.0696592	3	RPL8
LYZ	2.08844e-41	0.260943	0.951	0.88	3.53908e-37	3	LYZ
GSTP1	6.382e-06	0.259934	0.424	0.4	0.108149	3	GSTP1
RPL24	7.08769e-08	0.255727	0.544	0.522	0.00120108	3	RPL24
LST1	5.44723e-06	0.255264	0.375	0.336	0.0923087	3	LST1
MT-CO1	5.34904e-28	0.254868	0.969	0.968	9.06449e-24	3	MT-CO1
RACK1	3.3459e-05	0.254742	0.534	0.533	0.566996	3	RACK1
DEFA3	0	1.75486	0.97	0.813	0	4	DEFA3		Neutrophil A_BPI high
BPI	4.20943e-292	1.4978	0.847	0.369	7.1333e-288	4	BPI
DEFA4	2.3461e-246	1.26837	0.888	0.519	3.9757e-242	4	DEFA4
SLPI	5.29887e-173	1.2196	0.615	0.235	8.97946e-169	4	SLPI
CLC	8.66358e-08	1.14841	0.307	0.258	0.00146813	4	CLC
CEACAM6	5.28353e-133	1.11154	0.468	0.163	8.95347e-129	4	CEACAM6
MS4A3	3.25712e-172	1.0864	0.664	0.268	5.51952e-168	4	MS4A3
SRGN	3.09556e-299	1.01676	1	0.899	5.24574e-295	4	SRGN
RNASE3	2.49027e-107	0.940565	0.582	0.277	4.22001e-103	4	RNASE3
CD24	1.05011e-115	0.934816	0.632	0.313	1.77952e-111	4	CD24
CEACAM8	4.94184e-69	0.858432	0.465	0.234	8.37444e-65	4	CEACAM8
RNASE2	2.61496e-119	0.746015	0.824	0.521	4.43131e-115	4	RNASE2
MPO	1.93623e-74	0.636331	0.651	0.381	3.28113e-70	4	MPO
MIR223	1.17875e-30	0.606196	0.393	0.247	1.99752e-26	4	MIR223
CD59	4.18054e-20	0.58896	0.258	0.158	7.08435e-16	4	CD59
ELANE	5.61813e-134	0.56994	0.941	0.687	9.52048e-130	4	ELANE
RAB31	7.7301e-23	0.542971	0.284	0.166	1.30994e-18	4	RAB31
NUCB2	3.39318e-46	0.517145	0.523	0.314	5.75009e-42	4	NUCB2
GSN	2.13897e-21	0.514477	0.305	0.19	3.62469e-17	4	GSN
SERPINB1	3.28585e-30	0.483727	0.543	0.399	5.56821e-26	4	SERPINB1
PLAC8	1.12162e-31	0.482179	0.542	0.372	1.9007e-27	4	PLAC8
CTSD	3.83396e-10	0.479807	0.377	0.305	6.49702e-06	4	CTSD
NEAT1	4.19355e-09	0.462792	0.33	0.266	7.10639e-05	4	NEAT1
MALAT1	4.70508e-16	0.461935	0.418	0.32	7.97322e-12	4	MALAT1
NKG7	1.77185e-24	0.461746	0.444	0.305	3.00257e-20	4	NKG7
LYZ	2.25548e-47	0.456559	0.965	0.88	3.82213e-43	4	LYZ
AZU1	1.48868e-85	0.455429	0.919	0.679	2.52272e-81	4	AZU1
CD63	1.8278e-23	0.440182	0.536	0.415	3.09739e-19	4	CD63
TKT	2.16853e-13	0.439877	0.371	0.284	3.6748e-09	4	TKT
P4HB	4.7247e-14	0.420624	0.338	0.248	8.00648e-10	4	P4HB
RGL4	8.7618e-16	0.402243	0.333	0.229	1.48478e-11	4	RGL4
PRDX5	1.58046e-11	0.395781	0.35	0.275	2.67825e-07	4	PRDX5
ANXA3	1.9143e-15	0.337105	0.397	0.282	3.24398e-11	4	ANXA3
S100P	2.65057e-23	0.331702	0.556	0.406	4.49165e-19	4	S100P
EMB	2.95741e-06	0.310635	0.304	0.25	0.0501163	4	EMB
HCST	4.63357e-06	0.3087	0.36	0.308	0.0785204	4	HCST
TMSB4XP4	4.37416e-08	0.30655	0.418	0.354	0.000741245	4	TMSB4XP4
GSTP1	2.15333e-09	0.273549	0.467	0.396	3.64903e-05	4	GSTP1
H2AFV	0.000277266	0.259228	0.283	0.249	1	4	H2AFV
S100A10	0	1.85408	0.473	0.059	0	5	S100A10		Monocyte_S100A10 high
ANXA2	0	1.76286	0.487	0.051	0	5	ANXA2
CST3	1.23091e-256	1.61709	0.709	0.194	2.0859e-252	5	CST3
MS4A6A	4.10678e-228	1.56856	0.432	0.071	6.95935e-224	5	MS4A6A
CTSS	1.04831e-136	1.33975	0.538	0.184	1.77647e-132	5	CTSS
CTSB	6.93279e-121	1.26934	0.32	0.071	1.17483e-116	5	CTSB
HLA-DRB1	2.9511e-165	1.26033	0.547	0.148	5.00094e-161	5	HLA-DRB1
CD74	1.36598e-225	1.2596	0.869	0.334	2.3148e-221	5	CD74
LGALS1	2.78906e-190	1.22343	0.761	0.267	4.72634e-186	5	LGALS1
HLA-DRA	6.9934e-148	1.16964	0.649	0.225	1.1851e-143	5	HLA-DRA
S100A4	1.69999e-181	1.13035	0.876	0.476	2.88081e-177	5	S100A4
HLA-DPA1	5.91823e-94	1.04675	0.362	0.104	1.0029e-89	5	HLA-DPA1
HLA-DPB1	2.71737e-76	1.02189	0.338	0.107	4.60486e-72	5	HLA-DPB1
PSAP	4.87505e-83	1.01914	0.597	0.319	8.26126e-79	5	PSAP
TMSB10	7.17825e-206	1.00359	0.976	0.712	1.21643e-201	5	TMSB10
HLA-DRB5	4.9015e-79	0.983495	0.294	0.08	8.30608e-75	5	HLA-DRB5
GPX1	1.38589e-85	0.932101	0.527	0.221	2.34853e-81	5	GPX1
SH3BGRL3	2.44826e-118	0.904043	0.83	0.519	4.14882e-114	5	SH3BGRL3
RP11-1143G9.4	2.74629e-53	0.836018	0.325	0.125	4.65386e-49	5	RP11-1143G9.4
FTL	1.93153e-198	0.826671	0.997	0.958	3.27318e-194	5	FTL
AIF1	7.25391e-52	0.824577	0.585	0.347	1.22925e-47	5	AIF1
C1orf162	2.44563e-45	0.745788	0.384	0.178	4.14437e-41	5	C1orf162
FCER1G	2.54944e-56	0.744048	0.588	0.331	4.32028e-52	5	FCER1G
FCN1	3.08467e-46	0.719799	0.622	0.421	5.22729e-42	5	FCN1
MT2A	1.71497e-39	0.717636	0.357	0.167	2.90618e-35	5	MT2A
CARD16	1.81773e-32	0.709853	0.32	0.154	3.08033e-28	5	CARD16
SAT1	1.09183e-26	0.708588	0.31	0.164	1.85021e-22	5	SAT1
FTLP3	2.68116e-29	0.707995	0.295	0.145	4.54349e-25	5	FTLP3
LYZ	1.52068e-121	0.694008	0.983	0.88	2.57695e-117	5	LYZ
CFD	9.44843e-30	0.682236	0.399	0.219	1.60113e-25	5	CFD
TYROBP	3.25815e-71	0.677247	0.788	0.532	5.52127e-67	5	TYROBP
FOS	2.42005e-45	0.673561	0.526	0.289	4.10102e-41	5	FOS
NPC2	8.57163e-30	0.658109	0.385	0.215	1.45255e-25	5	NPC2
IFITM3	6.64792e-31	0.655395	0.405	0.226	1.12656e-26	5	IFITM3
PSME2	1.30959e-23	0.650256	0.325	0.184	2.21922e-19	5	PSME2
MRPL33	2.29347e-26	0.647757	0.327	0.176	3.88651e-22	5	MRPL33
SERPINA1	4.07527e-30	0.641725	0.251	0.108	6.90595e-26	5	SERPINA1
ARPC1B	3.29021e-36	0.637632	0.521	0.332	5.5756e-32	5	ARPC1B
LST1	3.45323e-39	0.636034	0.54	0.326	5.85185e-35	5	LST1
CD53	1.04293e-28	0.627688	0.288	0.137	1.76734e-24	5	CD53
DBI	1.37006e-21	0.608345	0.314	0.18	2.32171e-17	5	DBI
GRN	2.70364e-33	0.590533	0.484	0.289	4.58158e-29	5	GRN
CD52	8.45107e-26	0.589991	0.261	0.122	1.43212e-21	5	CD52
COTL1	1.50663e-24	0.572731	0.31	0.164	2.55313e-20	5	COTL1
VIM	1.26646e-42	0.565958	0.675	0.449	2.14614e-38	5	VIM
MT-TP	1.88342e-25	0.558251	0.456	0.286	3.19164e-21	5	MT-TP
TMSB4XP4	7.79221e-15	0.558027	0.482	0.351	1.32047e-10	5	TMSB4XP4
CAPG	1.12262e-21	0.555672	0.277	0.146	1.90239e-17	5	CAPG
MT-TW	3.29536e-18	0.551445	0.381	0.248	5.58432e-14	5	MT-TW
ITGB2	4.07967e-32	0.550499	0.472	0.277	6.91342e-28	5	ITGB2
DUSP1	1.00451e-13	0.547345	0.254	0.154	1.70225e-09	5	DUSP1
CALM2	7.83278e-33	0.537958	0.609	0.42	1.32734e-28	5	CALM2
S100A6	3.58202e-71	0.535515	0.885	0.705	6.07009e-67	5	S100A6
SLC25A6	7.80063e-19	0.531715	0.361	0.231	1.32189e-14	5	SLC25A6
FTH1	1.51642e-54	0.514637	0.749	0.481	2.56973e-50	5	FTH1
PYCARD	3.74839e-21	0.50102	0.325	0.184	6.35202e-17	5	PYCARD
S100A11	3.79777e-40	0.486472	0.74	0.533	6.43571e-36	5	S100A11
NDUFA12	4.87752e-13	0.484294	0.268	0.169	8.26544e-09	5	NDUFA12
FXYD5	4.31099e-15	0.472864	0.295	0.181	7.3054e-11	5	FXYD5
B2M	1.3893e-49	0.470353	0.996	0.988	2.35431e-45	5	B2M
CLIC1	4.70281e-16	0.462376	0.398	0.271	7.96938e-12	5	CLIC1
TAGLN2	7.65429e-10	0.456475	0.268	0.183	1.2971e-05	5	TAGLN2
TXNIP	6.53019e-17	0.433848	0.325	0.202	1.10661e-12	5	TXNIP
FPR1	4.15503e-17	0.403775	0.26	0.141	7.04111e-13	5	FPR1
PLBD1	5.9777e-11	0.402164	0.305	0.204	1.01298e-06	5	PLBD1
CYBA	4.56029e-09	0.3945	0.466	0.389	7.72787e-05	5	CYBA
LAPTM5	5.55892e-16	0.394382	0.516	0.399	9.42014e-12	5	LAPTM5
MT-TI	5.27598e-07	0.388347	0.259	0.19	0.00894067	5	MT-TI
EIF3K	1.12247e-06	0.370901	0.268	0.203	0.0190214	5	EIF3K
RHOA	8.50566e-11	0.368568	0.423	0.326	1.44137e-06	5	RHOA
ARPC3	1.04389e-18	0.364954	0.616	0.476	1.76898e-14	5	ARPC3
ALDOA	3.29008e-12	0.363546	0.398	0.288	5.57538e-08	5	ALDOA
ARPC2	1.12647e-14	0.363437	0.555	0.446	1.90892e-10	5	ARPC2
POMP	8.9702e-07	0.358161	0.281	0.215	0.0152009	5	POMP
H3F3B	4.55748e-12	0.353905	0.524	0.425	7.7231e-08	5	H3F3B
PSME1	1.17432e-10	0.350101	0.332	0.236	1.99e-06	5	PSME1
SLC25A5	2.28632e-06	0.34941	0.263	0.2	0.038744	5	SLC25A5
CSTA	1.06742e-21	0.335186	0.672	0.511	1.80885e-17	5	CSTA
TRAPPC1	6.83014e-07	0.327744	0.298	0.227	0.0115744	5	TRAPPC1
RP11-632C17--A.1	4.36588e-05	0.327373	0.253	0.197	0.739841	5	RP11-632C17--A.1
ITM2B	3.88023e-11	0.322009	0.371	0.264	6.57544e-07	5	ITM2B
RPL15P3	1.54896e-07	0.31591	0.27	0.194	0.00262487	5	RPL15P3
RPL18AP3	0.000404376	0.310662	0.304	0.258	1	5	RPL18AP3
RPS9	2.5325e-16	0.309506	0.693	0.576	4.29157e-12	5	RPS9
NDUFB9	2.55194e-06	0.30804	0.364	0.295	0.0432452	5	NDUFB9
ATP5O	5.25721e-06	0.306962	0.341	0.274	0.0890887	5	ATP5O
EIF1	2.31027e-09	0.302454	0.614	0.556	3.91498e-05	5	EIF1
TMSB4X	7.35204e-33	0.299596	0.999	0.966	1.24588e-28	5	TMSB4X
RP11-475C16.1	0.000108015	0.294388	0.266	0.212	1	5	RP11-475C16.1
ATP6V0E1	1.50962e-05	0.294158	0.324	0.261	0.25582	5	ATP6V0E1
COX4I1	1.72979e-07	0.291319	0.51	0.447	0.00293131	5	COX4I1
PFDN5	6.92001e-12	0.291049	0.558	0.463	1.17266e-07	5	PFDN5
RPS13	5.59179e-21	0.290856	0.783	0.64	9.47584e-17	5	RPS13
ATP5G2	6.3751e-06	0.290087	0.354	0.289	0.108032	5	ATP5G2
OAZ1	2.57654e-14	0.283658	0.737	0.657	4.3662e-10	5	OAZ1
COX8A	1.51693e-05	0.281408	0.355	0.295	0.257059	5	COX8A
PSMB3	0.000663752	0.276894	0.261	0.217	1	5	PSMB3
COX5B	2.19438e-06	0.276257	0.378	0.305	0.0371859	5	COX5B
MTATP6P1	1.55942e-07	0.275816	0.412	0.328	0.00264259	5	MTATP6P1
PRR13	4.23137e-05	0.273532	0.28	0.221	0.717048	5	PRR13
MTCO1P12	0.00181237	0.271248	0.26	0.221	1	5	MTCO1P12
ZFAS1	1.16315e-05	0.268663	0.303	0.236	0.197108	5	ZFAS1
RPL13P12	0.000684749	0.258374	0.328	0.281	1	5	RPL13P12
VAMP8	1.05932e-06	0.258326	0.412	0.331	0.0179512	5	VAMP8
GSTP1	4.45037e-08	0.25364	0.493	0.396	0.00075416	5	GSTP1
HSBP1	0.000344237	0.251482	0.26	0.211	1	5	HSBP1
DEFA3	1.26251e-216	1.35352	0.988	0.817	2.13945e-212	6	DEFA3		Neutrophil A_CEACAM6 high
DEFA4	1.69464e-182	1.34003	0.911	0.528	2.87174e-178	6	DEFA4
CEACAM6	1.31465e-209	1.20758	0.653	0.16	2.2278e-205	6	CEACAM6
SLPI	7.20684e-201	1.1739	0.767	0.237	1.22127e-196	6	SLPI
MS4A3	2.8223e-206	1.10784	0.826	0.269	4.78267e-202	6	MS4A3
BPI	1.0316e-194	1.04559	0.895	0.38	1.74815e-190	6	BPI
CD24	4.32779e-127	0.952293	0.76	0.315	7.33388e-123	6	CD24
DPY19L1P1	3.40204e-129	0.946459	0.274	0.043	5.76509e-125	6	DPY19L1P1
SRGN	4.47087e-183	0.904839	0.994	0.902	7.57633e-179	6	SRGN
HMGN2	1.68623e-66	0.88488	0.527	0.236	2.85749e-62	6	HMGN2
TYMS	1.80515e-79	0.840794	0.328	0.092	3.05901e-75	6	TYMS
DUT	7.48002e-78	0.833209	0.485	0.182	1.26756e-73	6	DUT
MPO	2.83958e-66	0.810807	0.687	0.387	4.81196e-62	6	MPO
CEACAM8	2.45647e-90	0.798219	0.602	0.232	4.16274e-86	6	CEACAM8
RNASE3	3.06077e-104	0.782161	0.7	0.279	5.18678e-100	6	RNASE3
CD59	8.48031e-74	0.762981	0.433	0.149	1.43707e-69	6	CD59
PCNA	4.4879e-67	0.755947	0.384	0.132	7.6052e-63	6	PCNA
NUCB2	1.96583e-83	0.739169	0.69	0.31	3.33129e-79	6	NUCB2
TUBB	3.3003e-63	0.731342	0.545	0.243	5.59268e-59	6	TUBB
RRM2	6.12134e-55	0.72175	0.277	0.088	1.03732e-50	6	RRM2
STMN1	5.473e-78	0.695609	0.562	0.221	9.27454e-74	6	STMN1
ELANE	2.85138e-71	0.695169	0.9	0.698	4.83195e-67	6	ELANE
FAM46A	1.06187e-58	0.672867	0.256	0.071	1.79944e-54	6	FAM46A
KIAA0101	8.55505e-51	0.633312	0.373	0.144	1.44974e-46	6	KIAA0101
NKG7	9.70763e-67	0.631533	0.643	0.297	1.64506e-62	6	NKG7
SPN	1.41264e-54	0.606342	0.302	0.097	2.39385e-50	6	SPN
GPI	8.38465e-55	0.599564	0.356	0.124	1.42086e-50	6	GPI
COL17A1	1.14414e-57	0.598363	0.32	0.101	1.93886e-53	6	COL17A1
PLAC8	3.0563e-60	0.589296	0.704	0.367	5.17921e-56	6	PLAC8
YWHAH	8.99731e-39	0.577596	0.262	0.096	1.52468e-34	6	YWHAH
TUBA1B	1.23968e-58	0.5705	0.715	0.376	2.10076e-54	6	TUBA1B
AZU1	1.26116e-64	0.567716	0.921	0.686	2.13716e-60	6	AZU1
RGL4	2.31828e-56	0.557077	0.522	0.22	3.92856e-52	6	RGL4
DEK	4.8757e-32	0.536668	0.251	0.1	8.26237e-28	6	DEK
H2AFZ	7.8402e-65	0.531334	0.797	0.416	1.3286e-60	6	H2AFZ
RGCC	2.97255e-37	0.524968	0.305	0.122	5.03728e-33	6	RGCC
ATP8B4	3.15147e-32	0.515434	0.253	0.098	5.34047e-28	6	ATP8B4
CD63	1.92765e-43	0.504105	0.695	0.408	3.26659e-39	6	CD63
RAB31	1.27371e-40	0.500167	0.39	0.163	2.15842e-36	6	RAB31
H2AFV	1.41852e-33	0.497774	0.462	0.239	2.40383e-29	6	H2AFV
IRF2BP2	2.4906e-35	0.496416	0.3	0.12	4.22056e-31	6	IRF2BP2
RNASE2	1.48278e-70	0.491623	0.883	0.527	2.51272e-66	6	RNASE2
TUBA4A	3.02655e-29	0.490747	0.287	0.124	5.12879e-25	6	TUBA4A
HNRNPH1	2.90394e-26	0.488195	0.263	0.117	4.92102e-22	6	HNRNPH1
GSN	2.90962e-37	0.487491	0.414	0.186	4.93064e-33	6	GSN
P4HB	2.70158e-32	0.466375	0.467	0.242	4.57809e-28	6	P4HB
TPP1	2.60567e-26	0.457282	0.32	0.153	4.41557e-22	6	TPP1
PRDX5	1.81241e-28	0.43386	0.493	0.268	3.07132e-24	6	PRDX5
ACTN1	1.65374e-34	0.433713	0.319	0.131	2.80243e-30	6	ACTN1
SCP2	2.72774e-24	0.431883	0.271	0.124	4.62242e-20	6	SCP2
SERPINB1	1.24071e-35	0.431822	0.678	0.395	2.10251e-31	6	SERPINB1
CANX	8.38259e-21	0.431264	0.276	0.138	1.42051e-16	6	CANX
CST7	2.31874e-34	0.418688	0.602	0.344	3.92933e-30	6	CST7
PRTN3	1.82346e-24	0.418457	0.735	0.547	3.09004e-20	6	PRTN3
TKT	2.39286e-28	0.417859	0.504	0.278	4.05494e-24	6	TKT
PKM	4.03144e-29	0.417661	0.455	0.234	6.83168e-25	6	PKM
MIR223	2.86093e-29	0.411605	0.476	0.246	4.84814e-25	6	MIR223
GNAI2	1.37581e-27	0.387834	0.345	0.161	2.33144e-23	6	GNAI2
ANXA11	2.28747e-21	0.383657	0.288	0.141	3.87635e-17	6	ANXA11
CTSG	5.66289e-37	0.37901	0.704	0.445	9.59634e-33	6	CTSG
TMEM123	6.00171e-25	0.378198	0.287	0.13	1.01705e-20	6	TMEM123
HMGN1	1.35596e-25	0.367627	0.485	0.269	2.29781e-21	6	HMGN1
C20orf27	1.6028e-18	0.36031	0.3	0.159	2.71611e-14	6	C20orf27
ACTR2	8.30451e-19	0.359624	0.33	0.178	1.40728e-14	6	ACTR2
ANXA3	1.27256e-32	0.359104	0.539	0.276	2.15648e-28	6	ANXA3
GSTP1	7.21397e-28	0.358362	0.635	0.387	1.22248e-23	6	GSTP1
S100P	1.42136e-36	0.357395	0.704	0.401	2.40864e-32	6	S100P
STOM	4.43099e-23	0.338307	0.376	0.192	7.50875e-19	6	STOM
NCF4	3.53562e-18	0.335392	0.284	0.146	5.99146e-14	6	NCF4
RNASEH2C	2.41926e-16	0.333665	0.322	0.181	4.09968e-12	6	RNASEH2C
GSTO1	2.4003e-16	0.332128	0.333	0.189	4.06755e-12	6	GSTO1
GRN	4.06054e-17	0.32737	0.467	0.291	6.881e-13	6	GRN
ENO1	2.90989e-21	0.32609	0.579	0.352	4.93111e-17	6	ENO1
COX8A	1.2541e-18	0.322582	0.473	0.288	2.1252e-14	6	COX8A
HMGB2	1.7997e-26	0.313934	0.678	0.411	3.04977e-22	6	HMGB2
HMGB1	8.64279e-23	0.300979	0.598	0.356	1.46461e-18	6	HMGB1
PSMB7	4.78736e-12	0.297674	0.311	0.191	8.11266e-08	6	PSMB7
EMB	6.79834e-21	0.289475	0.441	0.243	1.15205e-16	6	EMB
HNRNPA2B1	4.93984e-18	0.287796	0.498	0.302	8.37105e-14	6	HNRNPA2B1
SEC11A	6.96241e-13	0.269552	0.271	0.154	1.17985e-08	6	SEC11A
RETN	3.35309e-18	0.260914	0.632	0.425	5.68214e-14	6	RETN
CYSTM1	1.15204e-16	0.256726	0.368	0.204	1.95225e-12	6	CYSTM1
CALM1	1.50515e-15	0.254071	0.581	0.382	2.55062e-11	6	CALM1
HBA2	0	2.86051	0.987	0.714	0	7	HBA2		Erythroid cell_HBA2 high
HBA1	0	2.83048	0.985	0.69	0	7	HBA1
SLC4A1	0	2.814	0.809	0.081	0	7	SLC4A1
HBM	0	2.77771	0.871	0.149	0	7	HBM
HBD	0	2.64743	0.96	0.355	0	7	HBD
HBB	0	2.59946	0.995	0.773	0	7	HBB
HBG2	6.83301e-38	2.43952	0.325	0.145	1.15792e-33	7	HBG2
CA1	0	2.42891	0.89	0.236	0	7	CA1
ALAS2	0	2.32721	0.717	0.06	0	7	ALAS2
CA2	0	2.32325	0.799	0.104	0	7	CA2
AHSP	0	2.25652	0.946	0.257	0	7	AHSP
GYPA	0	2.21398	0.647	0.058	0	7	GYPA
SLC25A37	0	2.11971	0.687	0.113	0	7	SLC25A37
GYPB	0	2.0962	0.619	0.057	0	7	GYPB
PRDX2	0	1.96111	0.842	0.203	0	7	PRDX2
HEMGN	0	1.90692	0.499	0.041	0	7	HEMGN
HMBS	0	1.81794	0.565	0.062	0	7	HMBS
SLC2A1	0	1.81623	0.394	0.027	0	7	SLC2A1
TFRC	0	1.79961	0.558	0.079	0	7	TFRC
RHAG	0	1.76772	0.44	0.034	0	7	RHAG
BLVRB	5.23711e-306	1.72684	0.784	0.195	8.87481e-302	7	BLVRB
RHCE	0	1.55369	0.331	0.021	0	7	RHCE
SNCA	8.84425e-267	1.54993	0.351	0.033	1.49875e-262	7	SNCA
UROD	1.64579e-218	1.48942	0.572	0.123	2.78896e-214	7	UROD
SLC25A39	9.8261e-222	1.48207	0.435	0.067	1.66513e-217	7	SLC25A39
SELENBP1	3.45653e-279	1.46937	0.318	0.024	5.85744e-275	7	SELENBP1
ANK1	7.90839e-253	1.46033	0.282	0.021	1.34016e-248	7	ANK1
EPB42	2.94896e-244	1.39462	0.305	0.026	4.99731e-240	7	EPB42
MYL4	2.60458e-229	1.39132	0.329	0.035	4.41373e-225	7	MYL4
MGST3	1.08708e-152	1.38679	0.53	0.146	1.84216e-148	7	MGST3
FECH	1.79608e-179	1.30858	0.311	0.041	3.04363e-175	7	FECH
BSG	3.11304e-143	1.25741	0.542	0.157	5.27536e-139	7	BSG
CD36	9.26837e-145	1.23521	0.361	0.067	1.57062e-140	7	CD36
RAD23A	6.44145e-137	1.2253	0.357	0.071	1.09157e-132	7	RAD23A
GYPC	1.13118e-135	1.21385	0.507	0.144	1.91689e-131	7	GYPC
H1F0	1.7052e-98	1.12982	0.292	0.062	2.88962e-94	7	H1F0
FAM210B	1.99514e-121	1.1191	0.259	0.041	3.38096e-117	7	FAM210B
TUBG1	1.2394e-111	1.0769	0.273	0.049	2.10028e-107	7	TUBG1
TMEM14B	9.72129e-87	1.07449	0.392	0.12	1.64737e-82	7	TMEM14B
SMIM1	4.70001e-104	1.04511	0.259	0.047	7.96463e-100	7	SMIM1
ALAD	1.57321e-98	1.03243	0.257	0.049	2.66597e-94	7	ALAD
FTH1	3.19128e-139	1.01799	0.876	0.476	5.40795e-135	7	FTH1
UCP2	3.088e-85	1.01017	0.372	0.109	5.23293e-81	7	UCP2
EIF1AY	1.76342e-72	0.994364	0.262	0.065	2.98829e-68	7	EIF1AY
OAT	2.96004e-83	0.966266	0.272	0.063	5.01609e-79	7	OAT
FBXO7	3.27896e-74	0.943613	0.275	0.07	5.55652e-70	7	FBXO7
TFDP1	1.006e-65	0.926334	0.273	0.076	1.70477e-61	7	TFDP1
RRM2	1.38244e-56	0.91698	0.282	0.088	2.34268e-52	7	RRM2
TMEM14C	8.7008e-49	0.815465	0.287	0.097	1.47444e-44	7	TMEM14C
TUBA1B	3.35672e-67	0.813135	0.674	0.379	5.6883e-63	7	TUBA1B
BNIP3L	4.83787e-46	0.809527	0.26	0.087	8.19825e-42	7	BNIP3L
PTTG1	3.68461e-43	0.781529	0.303	0.116	6.24394e-39	7	PTTG1
ARL6IP1	3.14919e-32	0.763438	0.252	0.101	5.33662e-28	7	ARL6IP1
GUK1	2.12304e-35	0.71733	0.297	0.123	3.5977e-31	7	GUK1
HMGB2	4.33971e-53	0.7116	0.672	0.412	7.35407e-49	7	HMGB2
LGALS3	1.56795e-45	0.693501	0.356	0.14	2.65705e-41	7	LGALS3
TUBB	1.91116e-38	0.681703	0.471	0.249	3.23866e-34	7	TUBB
TUBB4B	2.21233e-29	0.660733	0.252	0.105	3.74901e-25	7	TUBB4B
KIAA0101	1.13217e-27	0.645219	0.311	0.149	1.91858e-23	7	KIAA0101
ANP32B	1.7702e-27	0.543241	0.39	0.205	2.99978e-23	7	ANP32B
UBB	7.1746e-28	0.47459	0.755	0.562	1.21581e-23	7	UBB
MPC2	3.70585e-17	0.460354	0.265	0.139	6.27993e-13	7	MPC2
CAT	8.95046e-22	0.445023	0.443	0.263	1.51674e-17	7	CAT
YBX1	3.16421e-16	0.408619	0.395	0.246	5.36207e-12	7	YBX1
SOD1	8.26278e-15	0.392648	0.27	0.151	1.40021e-10	7	SOD1
RBX1	5.3834e-09	0.366548	0.364	0.26	9.12271e-05	7	RBX1
RAN	1.17362e-14	0.362706	0.46	0.302	1.98882e-10	7	RAN
ATPIF1	1.14668e-12	0.361022	0.446	0.305	1.94316e-08	7	ATPIF1
SEC62	3.33999e-06	0.285029	0.32	0.242	0.0565995	7	SEC62
CD74	0	1.31445	0.869	0.313	0	8	CD74		Promonocyte
HLA-DRA	0	1.27266	0.753	0.196	0	8	HLA-DRA
HLA-DPB1	1.25489e-259	1.23012	0.451	0.085	2.12653e-255	8	HLA-DPB1
HLA-DRB1	2.60678e-275	1.21011	0.568	0.13	4.41746e-271	8	HLA-DRB1
HLA-DPA1	1.55802e-162	1.04242	0.38	0.092	2.64022e-158	8	HLA-DPA1
MIF	1.0458e-140	1.03913	0.466	0.158	1.77221e-136	8	MIF
LGALS1	9.36307e-168	1.02711	0.646	0.261	1.58667e-163	8	LGALS1
HLA-DRB5	9.46815e-170	1.02277	0.332	0.067	1.60447e-165	8	HLA-DRB5
GPX1	3.47413e-150	0.954781	0.559	0.205	5.88726e-146	8	GPX1
RP11-234A1.1	1.52484e-124	0.925794	0.507	0.196	2.584e-120	8	RP11-234A1.1
CFD	3.3398e-180	0.888795	0.582	0.191	5.65963e-176	8	CFD
RPS18	2.60291e-252	0.885141	0.973	0.7	4.4109e-248	8	RPS18
MT2A	9.63107e-77	0.874674	0.379	0.157	1.63208e-72	8	MT2A
RPL13P12	1.74199e-121	0.871557	0.574	0.252	2.95198e-117	8	RPL13P12
RPL18AP3	6.15716e-109	0.842232	0.532	0.231	1.04339e-104	8	RPL18AP3
RP11-475C16.1	1.72615e-81	0.815103	0.438	0.19	2.92514e-77	8	RP11-475C16.1
CLEC11A	2.74745e-93	0.80572	0.377	0.134	4.65583e-89	8	CLEC11A
MT-TW	4.44501e-104	0.798039	0.528	0.226	7.53251e-100	8	MT-TW
AC007969.5	6.02144e-81	0.786563	0.436	0.192	1.02039e-76	8	AC007969.5
RPL18A	1.14271e-155	0.781764	0.866	0.551	1.93643e-151	8	RPL18A
RPL41	2.37819e-147	0.768411	0.87	0.583	4.03008e-143	8	RPL41
RP11-632C17--A.1	1.80583e-79	0.763149	0.416	0.177	3.06016e-75	8	RP11-632C17--A.1
ATP5G2	9.18103e-88	0.762122	0.537	0.266	1.55582e-83	8	ATP5G2
RP11-466H18.1	7.71731e-92	0.756475	0.499	0.224	1.30778e-87	8	RP11-466H18.1
NPM1	1.44019e-109	0.753761	0.6	0.278	2.44054e-105	8	NPM1
CST3	1.03413e-118	0.753252	0.518	0.196	1.75244e-114	8	CST3
RPL10AP6	3.89515e-74	0.747124	0.382	0.16	6.60073e-70	8	RPL10AP6
RPL15P3	4.84845e-75	0.744798	0.408	0.175	8.21618e-71	8	RPL15P3
ZFAS1	1.46427e-78	0.737847	0.468	0.215	2.48135e-74	8	ZFAS1
AC090498.1	5.01878e-68	0.735206	0.318	0.123	8.50482e-64	8	AC090498.1
SNHG5	7.05587e-80	0.729424	0.504	0.245	1.19569e-75	8	SNHG5
RP4-765C7.2	1.33238e-63	0.722545	0.386	0.175	2.25785e-59	8	RP4-765C7.2
RPS27AP16	2.70236e-65	0.71972	0.34	0.141	4.57942e-61	8	RPS27AP16
RPS3AP6	1.5266e-67	0.717381	0.369	0.158	2.58698e-63	8	RPS3AP6
RPL22	1.17884e-102	0.715815	0.699	0.391	1.99765e-98	8	RPL22
RPS3AP26	3.16621e-67	0.70916	0.412	0.188	5.36546e-63	8	RPS3AP26
RP11-864N7.2	4.29567e-61	0.708702	0.365	0.164	7.27945e-57	8	RP11-864N7.2
IGFBP7	2.63293e-70	0.708165	0.271	0.091	4.46176e-66	8	IGFBP7
EEF1B2	9.1445e-95	0.706788	0.698	0.417	1.54963e-90	8	EEF1B2
MRPL33	1.74891e-72	0.704911	0.389	0.163	2.96371e-68	8	MRPL33
LDHB	2.0243e-69	0.699431	0.471	0.234	3.43039e-65	8	LDHB
RPL26	4.18793e-158	0.698987	0.919	0.628	7.09687e-154	8	RPL26
RPL37	9.62782e-145	0.698245	0.914	0.668	1.63153e-140	8	RPL37
RPL7P1	6.68305e-65	0.697028	0.369	0.16	1.13251e-60	8	RPL7P1
RP11-425L10.1	4.13818e-61	0.696733	0.383	0.176	7.01256e-57	8	RP11-425L10.1
MTATP6P1	1.70301e-77	0.696581	0.568	0.307	2.88592e-73	8	MTATP6P1
RPL23A	3.00163e-132	0.696321	0.832	0.511	5.08657e-128	8	RPL23A
RPL14P1	1.34101e-50	0.694567	0.26	0.105	2.27247e-46	8	RPL14P1
RPS2P46	4.96921e-72	0.693255	0.477	0.232	8.42082e-68	8	RPS2P46
RPL39P3	1.3423e-59	0.692388	0.256	0.092	2.27467e-55	8	RPL39P3
RPS23P8	6.07289e-55	0.690443	0.263	0.102	1.02911e-50	8	RPS23P8
RPL29	2.38279e-93	0.688547	0.714	0.431	4.03788e-89	8	RPL29
RPS2P5	1.22054e-60	0.687996	0.299	0.119	2.06832e-56	8	RPS2P5
RPL10A	7.64294e-98	0.684749	0.739	0.459	1.29517e-93	8	RPL10A
RPL13AP5	3.77901e-66	0.67786	0.412	0.188	6.40391e-62	8	RPL13AP5
RPL36A	8.66006e-129	0.677589	0.851	0.561	1.46753e-124	8	RPL36A
RPL12	6.70664e-107	0.67269	0.784	0.52	1.13651e-102	8	RPL12
RPS7	9.651e-105	0.670157	0.749	0.443	1.63546e-100	8	RPS7
RP11-543P15.1	2.05747e-83	0.669456	0.599	0.31	3.48659e-79	8	RP11-543P15.1
RPL37A	3.65517e-126	0.667631	0.884	0.617	6.19404e-122	8	RPL37A
RPL19	1.20685e-149	0.665848	0.929	0.691	2.04513e-145	8	RPL19
RPL7P9	2.20725e-62	0.665195	0.443	0.22	3.74041e-58	8	RPL7P9
RPL13	3.47964e-144	0.659824	0.924	0.735	5.89659e-140	8	RPL13
SNHG6	2.45013e-59	0.658974	0.409	0.197	4.15199e-55	8	SNHG6
MT-ND5	3.06717e-74	0.65891	0.586	0.321	5.19763e-70	8	MT-ND5
RPL23AP42	3.31637e-56	0.656125	0.302	0.124	5.61993e-52	8	RPL23AP42
RPL13AP25	1.03929e-50	0.655345	0.32	0.144	1.76118e-46	8	RPL13AP25
RPS3	1.81144e-164	0.655277	0.949	0.721	3.06967e-160	8	RPS3
MT-TP	7.6415e-61	0.655161	0.503	0.274	1.29493e-56	8	MT-TP
CTD-2287O16.1	5.3687e-49	0.651295	0.289	0.125	9.0978e-45	8	CTD-2287O16.1
RPS23	6.55496e-155	0.650795	0.943	0.696	1.1108e-150	8	RPS23
RPS15	9.03108e-141	0.649935	0.913	0.671	1.53041e-136	8	RPS15
RPS13	5.19695e-129	0.649201	0.885	0.623	8.80675e-125	8	RPS13
RPS7P1	2.03975e-47	0.649048	0.272	0.117	3.45657e-43	8	RPS7P1
RPS13P2	2.32268e-45	0.648389	0.26	0.111	3.93601e-41	8	RPS13P2
RPL38	1.22779e-115	0.648337	0.84	0.541	2.08062e-111	8	RPL38
RPL36	2.23744e-121	0.64679	0.889	0.632	3.79157e-117	8	RPL36
RPL39	1.98325e-130	0.644924	0.903	0.669	3.36082e-126	8	RPL39
PPIA	5.39331e-83	0.643646	0.726	0.45	9.13951e-79	8	PPIA
RPS5	1.26379e-84	0.642596	0.7	0.417	2.14163e-80	8	RPS5
RPS25	2.27815e-130	0.639975	0.907	0.641	3.86055e-126	8	RPS25
RPS10	1.06009e-87	0.638466	0.728	0.455	1.79643e-83	8	RPS10
RPL9P9	1.89981e-79	0.63826	0.654	0.377	3.21942e-75	8	RPL9P9
RPL3P4	2.93715e-59	0.637424	0.442	0.223	4.97729e-55	8	RPL3P4
RPL6P27	5.50465e-50	0.635866	0.347	0.165	9.32817e-46	8	RPL6P27
RPS3A	4.66757e-138	0.634377	0.929	0.716	7.90967e-134	8	RPS3A
RPS21	1.81581e-117	0.632636	0.865	0.587	3.07707e-113	8	RPS21
RPS2	2.60824e-112	0.63164	0.851	0.587	4.41992e-108	8	RPS2
GAS5	4.23479e-55	0.625517	0.501	0.281	7.17627e-51	8	GAS5
RPL13A	3.01909e-128	0.623305	0.907	0.666	5.11616e-124	8	RPL13A
RPS29	9.32895e-153	0.62259	0.963	0.797	1.58088e-148	8	RPS29
STMN1	1.64664e-32	0.618913	0.378	0.227	2.7904e-28	8	STMN1
RPL14	1.60424e-82	0.613671	0.746	0.479	2.71855e-78	8	RPL14
RPS8	8.94919e-118	0.612811	0.882	0.63	1.51653e-113	8	RPS8
SLC25A5	4.93773e-46	0.611263	0.364	0.186	8.36748e-42	8	SLC25A5
RPL31	6.16351e-163	0.609532	0.977	0.786	1.04447e-158	8	RPL31
RPL15	2.75304e-127	0.609457	0.929	0.719	4.6653e-123	8	RPL15
HNRNPA1	6.11237e-65	0.609331	0.597	0.356	1.0358e-60	8	HNRNPA1
RP11-343H5.4	4.02462e-47	0.607421	0.291	0.128	6.82012e-43	8	RP11-343H5.4
RP11-572P18.1	1.32408e-37	0.60459	0.261	0.122	2.24378e-33	8	RP11-572P18.1
RPS6	1.15126e-165	0.600978	0.983	0.816	1.95092e-161	8	RPS6
TAGLN2	3.24245e-50	0.596463	0.356	0.169	5.49466e-46	8	TAGLN2
RPL6	6.97855e-82	0.595956	0.755	0.511	1.18258e-77	8	RPL6
RPS20	3.68826e-117	0.59594	0.912	0.68	6.25012e-113	8	RPS20
HINT1	8.94938e-61	0.595306	0.568	0.324	1.51656e-56	8	HINT1
RPL27A	4.37919e-151	0.594914	0.973	0.781	7.42098e-147	8	RPL27A
RPL35	1.63868e-101	0.592504	0.871	0.614	2.7769e-97	8	RPL35
AC016739.2	4.04716e-41	0.591045	0.312	0.151	6.85831e-37	8	AC016739.2
C6orf48	1.79495e-49	0.589314	0.256	0.102	3.04173e-45	8	C6orf48
SNRPE	1.80366e-43	0.581057	0.392	0.209	3.05647e-39	8	SNRPE
SNRPD2	4.78649e-47	0.579665	0.487	0.279	8.11118e-43	8	SNRPD2
RPL23	1.18851e-84	0.578582	0.811	0.551	2.01405e-80	8	RPL23
RPL10	6.1693e-121	0.57853	0.912	0.717	1.04545e-116	8	RPL10
RPL7	3.13215e-139	0.577844	0.961	0.771	5.30773e-135	8	RPL7
RPS24	1.79921e-112	0.573986	0.893	0.658	3.04894e-108	8	RPS24
RPL32	4.78876e-136	0.573777	0.956	0.75	8.11504e-132	8	RPL32
MT-TE	8.11773e-29	0.571827	0.264	0.137	1.37563e-24	8	MT-TE
TMSB10	5.94482e-118	0.56881	0.938	0.706	1.00741e-113	8	TMSB10
RPL7A	1.18412e-88	0.567568	0.81	0.555	2.00661e-84	8	RPL7A
PYCARD	5.43467e-46	0.566798	0.362	0.175	9.2096e-42	8	PYCARD
RPS16	1.04963e-100	0.565942	0.87	0.597	1.7787e-96	8	RPS16
GSTP1	2.05162e-60	0.565577	0.636	0.376	3.47668e-56	8	GSTP1
HSPE1	7.08996e-31	0.563127	0.315	0.175	1.20146e-26	8	HSPE1
RPS15A	7.50133e-101	0.558236	0.888	0.664	1.27118e-96	8	RPS15A
RPLP0	4.58366e-98	0.558178	0.856	0.609	7.76748e-94	8	RPLP0
ATP5G3	4.79214e-46	0.55737	0.441	0.242	8.12076e-42	8	ATP5G3
FXYD5	1.09776e-46	0.556215	0.357	0.17	1.86026e-42	8	FXYD5
RP11-371A22.1	2.16576e-38	0.556015	0.315	0.159	3.6701e-34	8	RP11-371A22.1
RPL3	4.70687e-90	0.555428	0.857	0.629	7.97625e-86	8	RPL3
RPS27A	1.23331e-129	0.554956	0.951	0.767	2.08997e-125	8	RPS27A
RPS17	3.22285e-100	0.554521	0.897	0.67	5.46144e-96	8	RPS17
MT-ND4L	2.1176e-36	0.553595	0.335	0.176	3.58849e-32	8	MT-ND4L
SNHG8	4.3464e-40	0.552921	0.278	0.128	7.36541e-36	8	SNHG8
COX6C	2.05338e-50	0.548983	0.545	0.327	3.47966e-46	8	COX6C
MTCO1P12	8.45525e-37	0.548207	0.375	0.207	1.43283e-32	8	MTCO1P12
RPS19	8.0042e-142	0.545501	0.981	0.791	1.35639e-137	8	RPS19
RPL11	1.0924e-96	0.543082	0.898	0.711	1.85119e-92	8	RPL11
PSME2	1.16236e-39	0.542535	0.344	0.176	1.96973e-35	8	PSME2
RPLP1	1.28183e-144	0.542182	0.97	0.85	2.17219e-140	8	RPLP1
ATP5G1	3.36686e-29	0.541901	0.304	0.167	5.70548e-25	8	ATP5G1
RPS12	6.70624e-96	0.538614	0.911	0.729	1.13644e-91	8	RPS12
RP11-761N21.2	3.20233e-37	0.538141	0.301	0.149	5.42667e-33	8	RP11-761N21.2
RPL24	4.17839e-71	0.536584	0.75	0.498	7.0807e-67	8	RPL24
GPX4	3.66858e-35	0.532846	0.284	0.14	6.21677e-31	8	GPX4
RPL9	1.50496e-81	0.531197	0.851	0.614	2.5503e-77	8	RPL9
DBI	1.07624e-34	0.528681	0.329	0.173	1.82379e-30	8	DBI
NAA38	2.13478e-26	0.528073	0.307	0.177	3.6176e-22	8	NAA38
RPS9	2.4198e-73	0.527105	0.784	0.561	4.10059e-69	8	RPS9
PTMA	2.86768e-84	0.525016	0.877	0.621	4.85958e-80	8	PTMA
RPSA	2.24472e-51	0.524686	0.633	0.411	3.80389e-47	8	RPSA
GSTK1	2.67538e-32	0.520686	0.26	0.127	4.5337e-28	8	GSTK1
BST2	6.91797e-39	0.519009	0.286	0.133	1.17232e-34	8	BST2
RPS28	3.43303e-65	0.518096	0.78	0.557	5.81761e-61	8	RPS28
RPL18	5.01666e-72	0.516354	0.761	0.503	8.50123e-68	8	RPL18
VAMP8	2.78872e-45	0.509813	0.528	0.314	4.72577e-41	8	VAMP8
RPL35A	8.50249e-95	0.509304	0.907	0.71	1.44083e-90	8	RPL35A
RPL30	1.77492e-92	0.506499	0.898	0.728	3.00777e-88	8	RPL30
TPI1	9.26505e-36	0.502845	0.432	0.258	1.57006e-31	8	TPI1
MRPS21	8.45045e-28	0.502583	0.27	0.144	1.43201e-23	8	MRPS21
RPS11	4.29405e-84	0.501246	0.867	0.664	7.27669e-80	8	RPS11
RACK1	4.11831e-54	0.500441	0.716	0.512	6.97888e-50	8	RACK1
RPL5	1.0157e-64	0.499592	0.786	0.587	1.7212e-60	8	RPL5
MT-ND2	3.52193e-83	0.499154	0.873	0.694	5.96826e-79	8	MT-ND2
SLC25A6	2.15068e-35	0.493692	0.391	0.222	3.64454e-31	8	SLC25A6
H2AFZ	1.08011e-26	0.484406	0.568	0.425	1.83035e-22	8	H2AFZ
RPS27	3.10028e-155	0.483161	0.996	0.895	5.25373e-151	8	RPS27
PARK7	7.48101e-22	0.481085	0.295	0.177	1.26773e-17	8	PARK7
HSP90AB1	8.56223e-31	0.477477	0.295	0.156	1.45096e-26	8	HSP90AB1
COX5A	3.16088e-28	0.47745	0.346	0.201	5.35644e-24	8	COX5A
MT-ND1	4.07462e-71	0.467154	0.875	0.715	6.90485e-67	8	MT-ND1
RPL27	3.79726e-74	0.46578	0.875	0.679	6.43484e-70	8	RPL27
RPS4X	2.37419e-62	0.465041	0.804	0.593	4.0233e-58	8	RPS4X
RPLP2	1.27723e-82	0.463984	0.919	0.788	2.1644e-78	8	RPLP2
YBX1	7.00389e-30	0.454218	0.398	0.238	1.18688e-25	8	YBX1
MT-ND4	1.05846e-110	0.45037	0.985	0.908	1.79367e-106	8	MT-ND4
SNHG25	1.98084e-23	0.44956	0.256	0.142	3.35674e-19	8	SNHG25
APRT	2.36484e-22	0.449528	0.253	0.143	4.00746e-18	8	APRT
EEF1A1	3.74938e-78	0.449145	0.942	0.797	6.3537e-74	8	EEF1A1
RPL8	9.94848e-57	0.448926	0.796	0.586	1.68587e-52	8	RPL8
EIF3E	2.90939e-25	0.4489	0.285	0.159	4.93025e-21	8	EIF3E
NDUFB11	5.24237e-24	0.446291	0.265	0.147	8.88372e-20	8	NDUFB11
SOD1	1.52466e-20	0.44421	0.254	0.147	2.58369e-16	8	SOD1
RPL28	9.7679e-62	0.443107	0.846	0.671	1.65527e-57	8	RPL28
RPL21	1.19608e-103	0.442901	0.971	0.831	2.02688e-99	8	RPL21
AIF1	3.31906e-41	0.442102	0.559	0.34	5.62448e-37	8	AIF1
RPL34	3.53068e-109	0.441997	0.98	0.863	5.98309e-105	8	RPL34
LRRC75A-AS1	3.13927e-33	0.440151	0.581	0.414	5.31981e-29	8	LRRC75A-AS1
CLIC1	2.5608e-33	0.43996	0.44	0.261	4.33953e-29	8	CLIC1
ATP5B	1.90108e-20	0.439731	0.278	0.166	3.22156e-16	8	ATP5B
RPS14	1.72353e-107	0.435011	0.984	0.887	2.92069e-103	8	RPS14
CYBA	4.74284e-22	0.426037	0.525	0.379	8.03721e-18	8	CYBA
HMGB1	2.99377e-30	0.4249	0.53	0.353	5.07323e-26	8	HMGB1
PSME1	3.23675e-26	0.42438	0.374	0.227	5.48499e-22	8	PSME1
HSBP1	2.35666e-20	0.42333	0.326	0.202	3.99359e-16	8	HSBP1
BTF3	4.84897e-37	0.421836	0.623	0.431	8.21707e-33	8	BTF3
SNRPB	4.2179e-21	0.420206	0.253	0.143	7.14765e-17	8	SNRPB
COX8A	1.14988e-27	0.42014	0.44	0.283	1.94859e-23	8	COX8A
NAP1L1	4.60738e-25	0.41713	0.289	0.16	7.80767e-21	8	NAP1L1
SLIRP	2.58534e-21	0.406821	0.369	0.237	4.38112e-17	8	SLIRP
CHCHD2	4.40099e-26	0.406775	0.458	0.301	7.45791e-22	8	CHCHD2
COX7B	6.67188e-19	0.40674	0.407	0.281	1.13062e-14	8	COX7B
UQCRQ	7.93223e-25	0.405836	0.497	0.343	1.3442e-20	8	UQCRQ
COX6A1	6.85407e-25	0.405622	0.382	0.237	1.16149e-20	8	COX6A1
RAN	7.56455e-32	0.402761	0.475	0.292	1.28189e-27	8	RAN
SUB1	9.50578e-33	0.401688	0.452	0.274	1.61085e-28	8	SUB1
COX7C	2.42315e-33	0.401532	0.63	0.433	4.10627e-29	8	COX7C
ENO1	4.87229e-27	0.401414	0.508	0.35	8.25658e-23	8	ENO1
HNRNPC	4.17618e-23	0.400793	0.348	0.212	7.07696e-19	8	HNRNPC
NACA	1.93393e-38	0.396396	0.713	0.525	3.27724e-34	8	NACA
ATP5H	1.81723e-18	0.391557	0.284	0.174	3.07947e-14	8	ATP5H
SHFM1	2.20044e-21	0.389622	0.391	0.253	3.72886e-17	8	SHFM1
MT-TF	7.44281e-21	0.387711	0.276	0.161	1.26126e-16	8	MT-TF
ZFP36L2	3.19481e-17	0.386831	0.315	0.205	5.41392e-13	8	ZFP36L2
SNRPD1	1.31883e-17	0.386699	0.299	0.19	2.23489e-13	8	SNRPD1
ATP5O	1.98252e-22	0.384948	0.408	0.264	3.35958e-18	8	ATP5O
PPIB	3.02779e-18	0.383993	0.301	0.189	5.1309e-14	8	PPIB
SLC25A3	5.31219e-19	0.380045	0.292	0.178	9.00204e-15	8	SLC25A3
UBA52	3.00926e-37	0.378564	0.766	0.593	5.09949e-33	8	UBA52
RPL4	1.68598e-32	0.376553	0.617	0.427	2.85706e-28	8	RPL4
MT-CO1	1.87265e-114	0.376063	0.997	0.965	3.17339e-110	8	MT-CO1
MT-ATP6	9.11651e-87	0.374773	0.981	0.922	1.54488e-82	8	MT-ATP6
CSTA	4.37559e-30	0.37474	0.663	0.505	7.41487e-26	8	CSTA
PFDN5	8.01285e-28	0.372269	0.615	0.453	1.35786e-23	8	PFDN5
MT-CYB	4.03346e-61	0.369258	0.943	0.838	6.8351e-57	8	MT-CYB
COX7A2	2.72954e-21	0.36651	0.486	0.341	4.62548e-17	8	COX7A2
NDUFA12	2.79076e-16	0.364453	0.266	0.165	4.72922e-12	8	NDUFA12
USMG5	3.93121e-18	0.363134	0.416	0.29	6.66183e-14	8	USMG5
NDUFB4	2.44383e-16	0.360855	0.269	0.169	4.14132e-12	8	NDUFB4
FAU	6.00821e-35	0.360732	0.747	0.586	1.01815e-30	8	FAU
COX5B	8.72822e-17	0.358334	0.42	0.297	1.47908e-12	8	COX5B
UBB	7.48424e-31	0.355914	0.731	0.556	1.26828e-26	8	UBB
EIF3K	4.21429e-15	0.355009	0.298	0.197	7.14153e-11	8	EIF3K
MT-ND3	9.74971e-42	0.349817	0.843	0.704	1.65219e-37	8	MT-ND3
SNRPG	1.33608e-12	0.345378	0.374	0.275	2.26412e-08	8	SNRPG
RPS26	9.31912e-30	0.337756	0.733	0.545	1.57922e-25	8	RPS26
COX4I1	7.29883e-19	0.335384	0.572	0.438	1.23686e-14	8	COX4I1
MT-CO2	1.54421e-49	0.328627	0.955	0.872	2.61681e-45	8	MT-CO2
DYNLL1	5.42749e-14	0.323122	0.318	0.215	9.19743e-10	8	DYNLL1
NDUFA3	1.60581e-13	0.322743	0.341	0.24	2.72121e-09	8	NDUFA3
POLR2L	6.34669e-16	0.318191	0.397	0.277	1.07551e-11	8	POLR2L
SF3B5	3.21914e-14	0.315628	0.27	0.174	5.45515e-10	8	SF3B5
HSPA8	1.34536e-15	0.313768	0.325	0.214	2.27985e-11	8	HSPA8
NDUFB2	6.83223e-13	0.312183	0.354	0.252	1.15779e-08	8	NDUFB2
ATP5J2	1.29436e-14	0.311342	0.461	0.345	2.19342e-10	8	ATP5J2
RPS27L	6.07339e-10	0.310518	0.313	0.231	1.0292e-05	8	RPS27L
NDUFA4	7.15767e-18	0.308389	0.522	0.378	1.21294e-13	8	NDUFA4
CALM2	2.55943e-11	0.307345	0.53	0.422	4.33721e-07	8	CALM2
UQCRH	8.15773e-16	0.3068	0.432	0.309	1.38241e-11	8	UQCRH
SRP14	8.75514e-16	0.295819	0.519	0.389	1.48365e-11	8	SRP14
EEF2	2.98403e-12	0.287682	0.368	0.268	5.05673e-08	8	EEF2
ATP5A1	2.6023e-14	0.284733	0.327	0.218	4.40986e-10	8	ATP5A1
TUBA1B	1.29187e-11	0.282604	0.488	0.386	2.18919e-07	8	TUBA1B
POMP	1.8801e-10	0.282203	0.297	0.211	3.18602e-06	8	POMP
ANAPC11	5.0232e-11	0.2773	0.287	0.199	8.51231e-07	8	ANAPC11
ALDOA	2.39629e-12	0.277234	0.392	0.284	4.06075e-08	8	ALDOA
ATP5L	2.4128e-16	0.276765	0.607	0.469	4.08873e-12	8	ATP5L
LSM3	1.69705e-09	0.272269	0.278	0.198	2.87581e-05	8	LSM3
ERP29	2.74671e-11	0.271677	0.252	0.168	4.65457e-07	8	ERP29
S100A4	4.66756e-26	0.270461	0.672	0.483	7.90965e-22	8	S100A4
UQCR10	1.56158e-11	0.270427	0.422	0.317	2.64625e-07	8	UQCR10
ATP5J	2.63751e-11	0.264722	0.444	0.336	4.46952e-07	8	ATP5J
DUT	5.60428e-07	0.260332	0.256	0.194	0.00949702	8	DUT
ATP5I	1.45085e-09	0.259192	0.409	0.316	2.4586e-05	8	ATP5I
WDR83OS	2.93954e-09	0.25879	0.306	0.226	4.98135e-05	8	WDR83OS
NDUFB9	5.32779e-11	0.258276	0.387	0.29	9.02848e-07	8	NDUFB9
TRMT112	1.28814e-07	0.252473	0.266	0.199	0.00218288	8	TRMT112
NDUFS5	2.57368e-11	0.250486	0.357	0.26	4.36136e-07	8	NDUFS5
PRDX2	0	2.09454	0.943	0.204	0	9	PRDX2		Erythroid cell_PRDX2 high
CA1	1.26909e-277	1.99138	0.865	0.244	2.1506e-273	9	CA1
AHSP	0	1.86776	0.943	0.264	0	9	AHSP
CA2	0	1.83022	0.8	0.111	0	9	CA2
BLVRB	0	1.81937	0.923	0.194	0	9	BLVRB
IFI27	1.48994e-261	1.55144	0.398	0.037	2.52486e-257	9	IFI27
TMEM14B	0	1.49498	0.772	0.104	0	9	TMEM14B
TMEM14C	0	1.46398	0.703	0.079	0	9	TMEM14C
LXN	0	1.45085	0.606	0.059	0	9	LXN
HSPE1	2.15448e-273	1.42964	0.796	0.159	3.65098e-269	9	HSPE1
HBD	3.36555e-216	1.39354	0.939	0.362	5.70325e-212	9	HBD
REXO2	0	1.38056	0.554	0.041	0	9	REXO2
UROD	0	1.3792	0.772	0.118	0	9	UROD
APOC1	0	1.37295	0.412	0.014	0	9	APOC1
HBG2	7.01034e-16	1.37059	0.289	0.149	1.18797e-11	9	HBG2
TFRC	0	1.35465	0.665	0.078	0	9	TFRC
AKR1C3	0	1.35158	0.428	0.014	0	9	AKR1C3
FTH1	1.35218e-238	1.34249	0.982	0.475	2.2914e-234	9	FTH1
SLIRP	1.97731e-210	1.29298	0.851	0.221	3.35075e-206	9	SLIRP
GYPA	0	1.2857	0.582	0.068	0	9	GYPA
MPC2	4.17616e-290	1.27311	0.733	0.117	7.07693e-286	9	MPC2
CD36	0	1.26586	0.584	0.059	0	9	CD36
RAN	6.63174e-232	1.2618	0.913	0.281	1.12382e-227	9	RAN
GYPB	2.18183e-293	1.24494	0.554	0.066	3.69732e-289	9	GYPB
ATPIF1	3.8578e-206	1.22868	0.919	0.283	6.53743e-202	9	ATPIF1
GYPC	3.42258e-244	1.21304	0.719	0.137	5.79991e-240	9	GYPC
BOLA3	0	1.19339	0.537	0.039	0	9	BOLA3
HSPD1	2.59035e-299	1.19336	0.657	0.091	4.38961e-295	9	HSPD1
KIAA0101	9.32988e-268	1.19228	0.739	0.129	1.58104e-263	9	KIAA0101
HMGB1	2.07279e-193	1.18153	0.933	0.343	3.51256e-189	9	HMGB1
TUBG1	0	1.17044	0.471	0.042	0	9	TUBG1
SOD1	7.9606e-263	1.16704	0.737	0.129	1.349e-258	9	SOD1
HMBS	6.85892e-272	1.16382	0.545	0.068	1.16231e-267	9	HMBS
METAP2	0	1.16142	0.562	0.062	0	9	METAP2
SRI	1.38838e-260	1.16008	0.665	0.105	2.35275e-256	9	SRI
FAM178B	0	1.14767	0.352	0.011	0	9	FAM178B
HBB	1.23634e-173	1.14267	0.978	0.776	2.09511e-169	9	HBB
KLF1	0	1.14093	0.477	0.027	0	9	KLF1
NPM1	7.08148e-177	1.12911	0.865	0.283	1.20003e-172	9	NPM1
HEBP1	0	1.11848	0.523	0.043	0	9	HEBP1
HSPA8	1.32383e-145	1.11021	0.699	0.202	2.24337e-141	9	HSPA8
TUBA1B	2.06682e-188	1.09664	0.935	0.369	3.50244e-184	9	TUBA1B
MGST3	6.81763e-183	1.09159	0.657	0.144	1.15532e-178	9	MGST3
HBM	4.94982e-159	1.08565	0.655	0.167	8.38797e-155	9	HBM
HEMGN	7.57078e-277	1.08306	0.465	0.047	1.28294e-272	9	HEMGN
HBA1	5.02165e-124	1.08249	0.945	0.695	8.50969e-120	9	HBA1
RANBP1	4.93687e-259	1.06737	0.646	0.098	8.36601e-255	9	RANBP1
OAT	3.13153e-280	1.05898	0.495	0.054	5.30669e-276	9	OAT
CCNB1	3.084e-247	1.05711	0.42	0.044	5.22615e-243	9	CCNB1
CCT2	5.90443e-296	1.05566	0.509	0.053	1.00057e-291	9	CCT2
UBAC1	0	1.04966	0.45	0.034	0	9	UBAC1
PVT1	0	1.0412	0.279	0.011	0	9	PVT1
CKS2	1.15537e-199	1.03314	0.62	0.115	1.9579e-195	9	CKS2
ATP5G1	2.5301e-181	1.02367	0.695	0.155	4.28751e-177	9	ATP5G1
NDUFB6	4.56842e-195	1.02315	0.703	0.147	7.74165e-191	9	NDUFB6
SMIM1	7.22429e-286	1.02205	0.44	0.04	1.22423e-281	9	SMIM1
SYNGR1	1.29637e-235	1.02087	0.58	0.087	2.19683e-231	9	SYNGR1
GSTM3	0	1.02034	0.354	0.017	0	9	GSTM3
RHAG	0	1.01868	0.467	0.037	0	9	RHAG
PA2G4	1.64839e-238	1.01457	0.578	0.085	2.79336e-234	9	PA2G4
SLC25A39	6.79012e-225	1.00989	0.499	0.068	1.15065e-220	9	SLC25A39
DANCR	5.92158e-263	1.00644	0.436	0.044	1.00347e-258	9	DANCR
HSP90AA1	2.32851e-144	0.998464	0.749	0.216	3.9459e-140	9	HSP90AA1
PTTG1	7.29142e-214	0.996864	0.608	0.103	1.2356e-209	9	PTTG1
FBXO7	8.36542e-254	0.994021	0.501	0.061	1.4176e-249	9	FBXO7
SNRPG	1.55978e-149	0.981948	0.834	0.258	2.64321e-145	9	SNRPG
TAF9	2.65892e-191	0.97473	0.497	0.078	4.5058e-187	9	TAF9
SNRPE	1.23898e-166	0.974403	0.768	0.201	2.09958e-162	9	SNRPE
CCT6A	1.09987e-223	0.974255	0.509	0.07	1.86384e-219	9	CCT6A
ALAD	3.69058e-250	0.96477	0.422	0.043	6.25406e-246	9	ALAD
CNRIP1	0	0.960647	0.283	0.007	0	9	CNRIP1
SNRPD1	2.34664e-152	0.958948	0.697	0.176	3.97661e-148	9	SNRPD1
TUBB4B	2.49555e-174	0.958865	0.521	0.094	4.22895e-170	9	TUBB4B
GADD45GIP1	4.51854e-231	0.957519	0.517	0.07	7.65712e-227	9	GADD45GIP1
HMGA1	1.8564e-183	0.955083	0.594	0.114	3.14586e-179	9	HMGA1
TUBB	4.22735e-151	0.954349	0.788	0.235	7.16367e-147	9	TUBB
CDC20	7.53328e-243	0.953115	0.376	0.035	1.27659e-238	9	CDC20
BCCIP	1.56094e-242	0.948459	0.416	0.043	2.64518e-238	9	BCCIP
ECI2	1.09071e-303	0.947421	0.349	0.022	1.84832e-299	9	ECI2
PAICS	0	0.946032	0.404	0.03	0	9	PAICS
HBA2	2.07776e-87	0.943066	0.919	0.721	3.52097e-83	9	HBA2
RPS26	5.96544e-145	0.942407	0.972	0.544	1.0109e-140	9	RPS26
LDHB	7.69215e-148	0.941504	0.79	0.231	1.30351e-143	9	LDHB
UROS	1.13161e-236	0.940141	0.422	0.046	1.91763e-232	9	UROS
VDAC3	1.88297e-205	0.939506	0.564	0.093	3.19088e-201	9	VDAC3
LMNA	0	0.925267	0.317	0.012	0	9	LMNA
SNRPB	5.11466e-172	0.924014	0.626	0.131	8.66731e-168	9	SNRPB
C19orf48	1.33915e-229	0.922974	0.378	0.038	2.26932e-225	9	C19orf48
NME4	5.19683e-235	0.920721	0.483	0.06	8.80655e-231	9	NME4
DNAJC9	4.57672e-257	0.920468	0.434	0.044	7.7557e-253	9	DNAJC9
AK6	1.28823e-168	0.916656	0.37	0.05	2.18303e-164	9	AK6
CCT3	3.73717e-222	0.912974	0.451	0.056	6.33301e-218	9	CCT3
CACYBP	1.03036e-169	0.912669	0.463	0.076	1.74604e-165	9	CACYBP
MYL4	6.97397e-270	0.912222	0.398	0.034	1.18181e-265	9	MYL4
NME1	8.23167e-200	0.911016	0.554	0.091	1.39494e-195	9	NME1
POMP	2.9041e-139	0.907828	0.715	0.195	4.92128e-135	9	POMP
KCNH2	0	0.9062	0.331	0.013	0	9	KCNH2
UBE2T	4.13668e-233	0.903716	0.388	0.039	7.01002e-229	9	UBE2T
RPA3	4.28018e-197	0.902514	0.622	0.114	7.25319e-193	9	RPA3
TCP1	8.48596e-202	0.900296	0.477	0.068	1.43803e-197	9	TCP1
RPL22L1	8.80519e-191	0.896027	0.547	0.093	1.49213e-186	9	RPL22L1
RFESD	1.40925e-279	0.895942	0.319	0.02	2.38811e-275	9	RFESD
GFI1B	0	0.891454	0.299	0.013	0	9	GFI1B
ALAS2	2.9275e-189	0.890401	0.495	0.078	4.96094e-185	9	ALAS2
CCNB2	5.7273e-227	0.889987	0.414	0.046	9.70548e-223	9	CCNB2
CYCS	6.3365e-179	0.88859	0.545	0.097	1.07378e-174	9	CYCS
TUBA1C	3.24667e-155	0.88283	0.455	0.08	5.50181e-151	9	TUBA1C
SNRPF	1.64962e-158	0.881833	0.646	0.147	2.79545e-154	9	SNRPF
SRSF7	7.07025e-164	0.877154	0.65	0.142	1.19812e-159	9	SRSF7
ATP5G3	2.90274e-132	0.873765	0.77	0.237	4.91899e-128	9	ATP5G3
HSP90AB1	6.08089e-146	0.871011	0.624	0.147	1.03047e-141	9	HSP90AB1
GTF3C6	1.56277e-166	0.870882	0.521	0.095	2.64826e-162	9	GTF3C6
LINC01133	0	0.869939	0.251	0.007	0	9	LINC01133
GMNN	2.10438e-256	0.866145	0.374	0.032	3.56608e-252	9	GMNN
EBNA1BP2	7.14278e-201	0.864257	0.349	0.037	1.21041e-196	9	EBNA1BP2
EIF1AY	6.03089e-153	0.863683	0.392	0.061	1.022e-148	9	EIF1AY
NOP10	1.22629e-103	0.861976	0.758	0.262	2.07807e-99	9	NOP10
BLVRA	3.5687e-168	0.857983	0.414	0.061	6.04752e-164	9	BLVRA
ALDH1A1	6.61413e-296	0.854845	0.259	0.01	1.12083e-291	9	ALDH1A1
FADS2	5.07518e-307	0.854457	0.299	0.014	8.6004e-303	9	FADS2
GATA1	0	0.853721	0.325	0.016	0	9	GATA1
DTYMK	1.06531e-218	0.85362	0.402	0.045	1.80527e-214	9	DTYMK
DDX1	1.02865e-224	0.852409	0.354	0.033	1.74315e-220	9	DDX1
PSMG1	4.21076e-213	0.837185	0.352	0.035	7.13555e-209	9	PSMG1
SLC25A5	1.91235e-153	0.837016	0.719	0.178	3.24068e-149	9	SLC25A5
MCM7	2.55694e-178	0.835361	0.448	0.068	4.33299e-174	9	MCM7
YBX1	4.90998e-131	0.834897	0.768	0.229	8.32045e-127	9	YBX1
CYB5A	2.41238e-194	0.834611	0.293	0.026	4.08801e-190	9	CYB5A
PEBP1	1.62359e-154	0.833053	0.517	0.099	2.75134e-150	9	PEBP1
RRM2	9.76565e-148	0.83305	0.453	0.082	1.65489e-143	9	RRM2
NOP58	5.37508e-149	0.831127	0.374	0.057	9.10861e-145	9	NOP58
TRMT112	8.88324e-138	0.830775	0.697	0.181	1.50535e-133	9	TRMT112
PRDX3	3.25384e-165	0.827385	0.63	0.132	5.51396e-161	9	PRDX3
SSB	4.45587e-158	0.825601	0.463	0.08	7.55092e-154	9	SSB
CALM2	1.66802e-77	0.822232	0.867	0.411	2.82663e-73	9	CALM2
TSC22D1	3.03456e-253	0.820134	0.295	0.019	5.14236e-249	9	TSC22D1
MINPP1	3.30422e-248	0.820015	0.315	0.023	5.59933e-244	9	MINPP1
FECH	9.28366e-210	0.81913	0.374	0.04	1.57321e-205	9	FECH
PCNA	2.46457e-161	0.814489	0.602	0.124	4.17647e-157	9	PCNA
RPLP0	3.08188e-138	0.812661	0.98	0.617	5.22255e-134	9	RPLP0
CENPW	4.81464e-157	0.806401	0.446	0.075	8.15889e-153	9	CENPW
EXOSC8	3.87043e-146	0.804172	0.386	0.061	6.55884e-142	9	EXOSC8
PHB	4.35818e-145	0.803567	0.388	0.062	7.38538e-141	9	PHB
STMN1	1.40867e-111	0.802467	0.713	0.219	2.38714e-107	9	STMN1
ERH	3.15136e-149	0.80075	0.576	0.123	5.3403e-145	9	ERH
PCCB	7.29428e-264	0.799986	0.325	0.022	1.23609e-259	9	PCCB
NHP2	3.25736e-154	0.799804	0.539	0.106	5.51992e-150	9	NHP2
DDX18	2.14005e-114	0.798379	0.349	0.063	3.62652e-110	9	DDX18
MINOS1	8.09226e-119	0.796595	0.598	0.154	1.37132e-114	9	MINOS1
ILF2	1.8775e-172	0.795458	0.489	0.081	3.1816e-168	9	ILF2
UBE2C	5.70875e-121	0.794058	0.374	0.068	9.67405e-117	9	UBE2C
NDUFAB1	4.77903e-154	0.793483	0.59	0.123	8.09855e-150	9	NDUFAB1
SNRPC	4.44156e-134	0.791447	0.556	0.126	7.52667e-130	9	SNRPC
TIMM13	1.38588e-167	0.789044	0.485	0.082	2.34851e-163	9	TIMM13
EIF5A	3.23412e-157	0.788062	0.509	0.095	5.48054e-153	9	EIF5A
CKS1B	5.44229e-140	0.787276	0.44	0.08	9.2225e-136	9	CKS1B
COPS3	5.66481e-180	0.786994	0.388	0.051	9.59958e-176	9	COPS3
MRPL13	2.95122e-133	0.78569	0.39	0.067	5.00114e-129	9	MRPL13
DUT	2.18407e-133	0.783369	0.677	0.176	3.70112e-129	9	DUT
NDUFA8	1.02457e-176	0.783198	0.416	0.059	1.73623e-172	9	NDUFA8
CDKN3	1.81994e-170	0.782907	0.382	0.052	3.08407e-166	9	CDKN3
SSBP1	2.40348e-132	0.782455	0.628	0.155	4.07294e-128	9	SSBP1
PSMB1	2.31795e-130	0.77917	0.693	0.186	3.928e-126	9	PSMB1
CCDC34	1.61202e-190	0.772383	0.291	0.026	2.73172e-186	9	CCDC34
RPF2	8.01635e-177	0.770245	0.267	0.024	1.35845e-172	9	RPF2
HIGD1A	1.21673e-174	0.768357	0.368	0.047	2.06186e-170	9	HIGD1A
TXNL1	4.60623e-166	0.767581	0.436	0.068	7.80572e-162	9	TXNL1
RPL26L1	1.85338e-152	0.764979	0.317	0.04	3.14074e-148	9	RPL26L1
NARF	7.34257e-182	0.764354	0.39	0.05	1.24427e-177	9	NARF
NCL	5.48763e-134	0.762954	0.499	0.104	9.29934e-130	9	NCL
CYC1	1.80606e-169	0.762123	0.479	0.079	3.06055e-165	9	CYC1
H2AFZ	2.31802e-89	0.756348	0.913	0.416	3.92811e-85	9	H2AFZ
PFDN4	4.94618e-158	0.753009	0.378	0.054	8.38179e-154	9	PFDN4
UQCC2	1.58552e-144	0.751491	0.406	0.067	2.68682e-140	9	UQCC2
CAST	8.61102e-164	0.751293	0.41	0.061	1.45922e-159	9	CAST
NDUFA6	4.31869e-147	0.750815	0.558	0.116	7.31845e-143	9	NDUFA6
PARVB	1.04426e-238	0.750197	0.295	0.02	1.7696e-234	9	PARVB
DDX39A	9.55412e-157	0.746782	0.434	0.071	1.61904e-152	9	DDX39A
TYMS	4.20187e-147	0.743739	0.477	0.088	7.12048e-143	9	TYMS
NUTF2	2.24721e-144	0.742257	0.372	0.057	3.80812e-140	9	NUTF2
FKBP4	8.05344e-233	0.742084	0.269	0.017	1.36474e-228	9	FKBP4
TIMM8B	1.77865e-107	0.740123	0.584	0.158	3.0141e-103	9	TIMM8B
NOP16	1.3232e-166	0.739332	0.261	0.025	2.24229e-162	9	NOP16
C1QBP	3.45386e-158	0.738656	0.402	0.061	5.85292e-154	9	C1QBP
MRPL37	3.05807e-209	0.738533	0.362	0.038	5.18221e-205	9	MRPL37
ODC1	6.33658e-211	0.738094	0.317	0.028	1.0738e-206	9	ODC1
MRPL14	5.591e-156	0.737768	0.37	0.053	9.47451e-152	9	MRPL14
IDH2	2.13817e-145	0.736178	0.438	0.076	3.62335e-141	9	IDH2
PTGES3	2.53098e-124	0.736099	0.57	0.137	4.289e-120	9	PTGES3
TK1	1.16768e-175	0.734079	0.378	0.049	1.97876e-171	9	TK1
PTMA	7.59496e-109	0.733557	0.988	0.63	1.28704e-104	9	PTMA
NUDC	1.46035e-172	0.73303	0.436	0.065	2.47471e-168	9	NUDC
COX7B	1.88889e-104	0.732545	0.788	0.269	3.2009e-100	9	COX7B
HNRNPC	7.24613e-106	0.732213	0.675	0.203	1.22793e-101	9	HNRNPC
EIF5B	1.51074e-117	0.732117	0.461	0.1	2.5601e-113	9	EIF5B
MRPS9	1.89435e-194	0.729808	0.259	0.02	3.21016e-190	9	MRPS9
MRPL22	2.35706e-151	0.729107	0.406	0.064	3.99428e-147	9	MRPL22
CENPU	1.27963e-180	0.729041	0.299	0.03	2.16846e-176	9	CENPU
MRPL1	7.10494e-144	0.728886	0.267	0.03	1.204e-139	9	MRPL1
FEN1	7.94751e-169	0.728503	0.299	0.032	1.34679e-164	9	FEN1
TPRKB	4.61917e-139	0.726718	0.487	0.095	7.82764e-135	9	TPRKB
PSMD12	2.41267e-171	0.725809	0.307	0.033	4.08852e-167	9	PSMD12
ACP1	3.92257e-140	0.725076	0.451	0.083	6.64719e-136	9	ACP1
ATP5I	5.49936e-94	0.721981	0.814	0.301	9.31922e-90	9	ATP5I
CCT4	7.65057e-155	0.720346	0.436	0.072	1.29647e-150	9	CCT4
SNRPD2	9.06629e-106	0.718954	0.802	0.275	1.53637e-101	9	SNRPD2
PPA2	2.42625e-140	0.716805	0.36	0.055	4.11152e-136	9	PPA2
ATP5F1	2.05555e-117	0.71492	0.626	0.164	3.48333e-113	9	ATP5F1
RFC4	3.19804e-144	0.714614	0.279	0.033	5.41939e-140	9	RFC4
SRSF3	1.44386e-98	0.713845	0.632	0.19	2.44676e-94	9	SRSF3
TCEB1	7.93161e-122	0.712104	0.527	0.121	1.34409e-117	9	TCEB1
GLRX5	2.07867e-166	0.711126	0.358	0.047	3.52251e-162	9	GLRX5
PSMC3	1.61454e-158	0.707448	0.39	0.057	2.73601e-154	9	PSMC3
SNRPD3	4.53765e-127	0.705895	0.556	0.128	7.68951e-123	9	SNRPD3
DNAJA4	3.7857e-201	0.704821	0.255	0.018	6.41525e-197	9	DNAJA4
UQCRQ	2.78496e-98	0.704754	0.871	0.333	4.71939e-94	9	UQCRQ
NDUFS5	1.28589e-103	0.703089	0.756	0.246	2.17906e-99	9	NDUFS5
GAR1	3.85299e-180	0.701847	0.257	0.022	6.52928e-176	9	GAR1
PPIA	4.46697e-81	0.700609	0.865	0.459	7.56972e-77	9	PPIA
CDK4	1.25477e-152	0.700602	0.35	0.048	2.12633e-148	9	CDK4
PSMB5	7.23565e-134	0.700419	0.392	0.067	1.22615e-129	9	PSMB5
NUP37	3.73798e-145	0.699806	0.275	0.032	6.33439e-141	9	NUP37
HSPB1	2.97655e-120	0.697885	0.43	0.086	5.04405e-116	9	HSPB1
PSMB6	7.04149e-129	0.697376	0.598	0.142	1.19325e-124	9	PSMB6
MCM4	2.84252e-166	0.695503	0.295	0.032	4.81693e-162	9	MCM4
GINS2	2.28755e-160	0.694544	0.267	0.027	3.87648e-156	9	GINS2
RAD23A	8.73844e-145	0.692584	0.42	0.071	1.48082e-140	9	RAD23A
RPL35	8.04377e-103	0.691778	0.984	0.623	1.3631e-98	9	RPL35
ASF1A	6.20551e-162	0.689622	0.269	0.027	1.05159e-157	9	ASF1A
ATP5C1	8.28436e-136	0.689622	0.547	0.118	1.40387e-131	9	ATP5C1
CDK1	2.0233e-136	0.687391	0.321	0.046	3.42868e-132	9	CDK1
EIF2S2	1.32395e-102	0.686739	0.606	0.171	2.24356e-98	9	EIF2S2
LSM5	2.45438e-105	0.686338	0.602	0.165	4.1592e-101	9	LSM5
ARL6IP1	1.23852e-99	0.684781	0.416	0.094	2.09879e-95	9	ARL6IP1
YWHAQ	5.90834e-157	0.684492	0.412	0.064	1.00123e-152	9	YWHAQ
NDUFC1	1.68064e-125	0.684428	0.618	0.152	2.848e-121	9	NDUFC1
MRPL21	4.91204e-120	0.682986	0.38	0.069	8.32394e-116	9	MRPL21
EPB42	4.86344e-180	0.6827	0.299	0.03	8.24158e-176	9	EPB42
PSMD6	3.12986e-156	0.680621	0.408	0.062	5.30387e-152	9	PSMD6
RUVBL2	3.2418e-152	0.679797	0.323	0.041	5.49356e-148	9	RUVBL2
CISD2	4.12204e-133	0.67924	0.287	0.038	6.9852e-129	9	CISD2
BRIX1	3.12236e-144	0.67545	0.257	0.028	5.29115e-140	9	BRIX1
TPGS2	2.24242e-168	0.674201	0.297	0.031	3.80001e-164	9	TPGS2
SSSCA1	1.48665e-158	0.673462	0.267	0.027	2.51928e-154	9	SSSCA1
RPL4	1.53441e-91	0.672004	0.913	0.423	2.60021e-87	9	RPL4
TSTA3	8.42037e-161	0.670225	0.35	0.046	1.42692e-156	9	TSTA3
STRA13	5.78918e-129	0.669606	0.301	0.042	9.81035e-125	9	STRA13
EIF2S1	3.2781e-135	0.669603	0.293	0.038	5.55506e-131	9	EIF2S1
MRPS15	6.07129e-143	0.665379	0.396	0.064	1.02884e-138	9	MRPS15
RPL24	7.22832e-91	0.6642	0.925	0.504	1.22491e-86	9	RPL24
EIF3I	8.47898e-138	0.663614	0.448	0.082	1.43685e-133	9	EIF3I
TIMM10	1.00233e-153	0.662289	0.325	0.041	1.69855e-149	9	TIMM10
EEF1E1	1.41487e-112	0.66191	0.382	0.074	2.39763e-108	9	EEF1E1
MRPL27	8.44094e-139	0.660922	0.384	0.062	1.4304e-134	9	MRPL27
PSMA3	4.96207e-128	0.660785	0.438	0.084	8.40873e-124	9	PSMA3
NASP	4.62022e-150	0.6603	0.368	0.054	7.82942e-146	9	NASP
SNCA	1.09908e-169	0.660021	0.327	0.038	1.8625e-165	9	SNCA
MRPL20	1.05442e-118	0.655712	0.495	0.11	1.78682e-114	9	MRPL20
ANP32B	1.00835e-102	0.653218	0.657	0.193	1.70875e-98	9	ANP32B
ADSL	2.74719e-147	0.653104	0.309	0.039	4.65539e-143	9	ADSL
METTL5	4.11315e-121	0.65258	0.325	0.052	6.97015e-117	9	METTL5
RBX1	3.51189e-99	0.651272	0.749	0.241	5.95124e-95	9	RBX1
ATP5A1	7.34795e-98	0.651049	0.675	0.207	1.24518e-93	9	ATP5A1
GTF3A	3.8665e-114	0.649536	0.446	0.095	6.55218e-110	9	GTF3A
ETFB	1.04612e-108	0.645777	0.372	0.072	1.77276e-104	9	ETFB
SLC38A5	4.51011e-196	0.642779	0.295	0.026	7.64284e-192	9	SLC38A5
NUSAP1	2.54808e-105	0.642642	0.327	0.059	4.31798e-101	9	NUSAP1
HPRT1	1.44561e-138	0.641599	0.339	0.049	2.44974e-134	9	HPRT1
RPL14	3.46865e-82	0.640867	0.899	0.486	5.87797e-78	9	RPL14
PSMC2	2.95592e-120	0.639906	0.343	0.057	5.0091e-116	9	PSMC2
RPS5	1.21379e-81	0.639559	0.867	0.425	2.05689e-77	9	RPS5
MTCH2	8.93774e-133	0.638938	0.352	0.055	1.51459e-128	9	MTCH2
VBP1	3.46885e-126	0.637884	0.394	0.07	5.87832e-122	9	VBP1
DHFR	1.68978e-125	0.636908	0.315	0.047	2.8635e-121	9	DHFR
CCT8	4.17767e-116	0.635733	0.414	0.082	7.07947e-112	9	CCT8
RPS7	6.94932e-87	0.634303	0.923	0.452	1.17763e-82	9	RPS7
EIF3M	1.64239e-99	0.634051	0.483	0.119	2.78319e-95	9	EIF3M
KPNA2	8.3631e-119	0.633995	0.327	0.053	1.41721e-114	9	KPNA2
STOML2	6.01264e-138	0.633021	0.388	0.064	1.0189e-133	9	STOML2
TXN2	4.84322e-120	0.631145	0.366	0.065	8.20732e-116	9	TXN2
CCT7	2.55147e-141	0.630195	0.384	0.061	4.32372e-137	9	CCT7
SERBP1	4.73232e-115	0.630137	0.483	0.108	8.0194e-111	9	SERBP1
ATP5O	2.80661e-80	0.629193	0.719	0.257	4.75607e-76	9	ATP5O
SNU13	9.61279e-112	0.628541	0.519	0.123	1.62898e-107	9	SNU13
RPSA	5.52929e-68	0.627846	0.81	0.415	9.36994e-64	9	RPSA
HAT1	1.76917e-112	0.626941	0.301	0.048	2.99803e-108	9	HAT1
HIKESHI	3.72448e-123	0.626507	0.327	0.051	6.31151e-119	9	HIKESHI
DNAJC19	3.13165e-116	0.626208	0.36	0.064	5.3069e-112	9	DNAJC19
HMGB3	6.15345e-108	0.623899	0.267	0.04	1.04276e-103	9	HMGB3
POLE3	2.77993e-131	0.62382	0.315	0.045	4.71086e-127	9	POLE3
IMPDH2	5.4788e-122	0.622575	0.331	0.053	9.28438e-118	9	IMPDH2
FBL	7.81211e-116	0.621882	0.42	0.085	1.32384e-111	9	FBL
BIRC5	5.48207e-128	0.62085	0.277	0.036	9.28991e-124	9	BIRC5
UCP2	6.63061e-116	0.620305	0.483	0.106	1.12362e-111	9	UCP2
MRPL42	7.23677e-139	0.616861	0.271	0.032	1.22634e-134	9	MRPL42
CENPM	1.21719e-125	0.616658	0.251	0.031	2.06266e-121	9	CENPM
CCT5	5.48428e-116	0.616586	0.455	0.096	9.29367e-112	9	CCT5
MRPL2	2.94228e-122	0.614306	0.269	0.036	4.98599e-118	9	MRPL2
MAD2L1	3.71893e-124	0.612249	0.311	0.046	6.30209e-120	9	MAD2L1
CBX3	8.64026e-94	0.612007	0.552	0.153	1.46418e-89	9	CBX3
COX5A	7.91916e-90	0.610973	0.63	0.195	1.34198e-85	9	COX5A
SRP14	6.30494e-70	0.610326	0.834	0.381	1.06844e-65	9	SRP14
SIVA1	1.27643e-116	0.610266	0.418	0.083	2.16303e-112	9	SIVA1
SNHG3	1.20094e-107	0.609992	0.382	0.076	2.03511e-103	9	SNHG3
ECH1	3.96562e-84	0.609917	0.362	0.084	6.72013e-80	9	ECH1
ANAPC11	1.74931e-100	0.609194	0.644	0.187	2.96438e-96	9	ANAPC11
SLBP	1.15698e-113	0.608979	0.311	0.05	1.96061e-109	9	SLBP
FAM210B	1.16793e-142	0.607542	0.311	0.041	1.97917e-138	9	FAM210B
LSM3	1.74784e-98	0.604061	0.64	0.185	2.96189e-94	9	LSM3
TFDP1	4.94393e-117	0.603265	0.386	0.072	8.37798e-113	9	TFDP1
UBB	4.29551e-71	0.600114	0.954	0.554	7.27917e-67	9	UBB
SELENBP1	2.42719e-151	0.597463	0.273	0.03	4.11312e-147	9	SELENBP1
SKP1	1.07143e-82	0.595941	0.693	0.232	1.81564e-78	9	SKP1
C8orf59	2.72579e-97	0.595218	0.505	0.128	4.61912e-93	9	C8orf59
MRPS7	1.98475e-121	0.593527	0.321	0.05	3.36335e-117	9	MRPS7
DPY30	3.94753e-85	0.593343	0.335	0.072	6.68949e-81	9	DPY30
MRPL18	4.862e-99	0.589951	0.38	0.08	8.23915e-95	9	MRPL18
NDUFA5	9.23259e-113	0.589903	0.321	0.053	1.56455e-108	9	NDUFA5
PRDX1	5.17544e-110	0.589288	0.43	0.09	8.7703e-106	9	PRDX1
PSMA5	2.29658e-109	0.589221	0.386	0.076	3.89179e-105	9	PSMA5
PSMA2	9.17539e-95	0.589192	0.586	0.165	1.55486e-90	9	PSMA2
LSM4	4.57672e-117	0.588904	0.412	0.081	7.75571e-113	9	LSM4
MRPL3	4.59472e-132	0.588336	0.295	0.04	7.78621e-128	9	MRPL3
DNAJA1	1.43488e-95	0.584409	0.416	0.095	2.43155e-91	9	DNAJA1
RPL8	1.84363e-85	0.583108	0.962	0.59	3.12421e-81	9	RPL8
PSMA4	1.98691e-83	0.582878	0.535	0.156	3.36702e-79	9	PSMA4
EIF4EBP1	1.37859e-98	0.58184	0.339	0.066	2.33616e-94	9	EIF4EBP1
SLC29A1	6.92115e-154	0.581308	0.257	0.026	1.17286e-149	9	SLC29A1
UBE2V2	3.1543e-97	0.580954	0.356	0.072	5.34528e-93	9	UBE2V2
NAA50	2.90404e-129	0.580564	0.317	0.046	4.92118e-125	9	NAA50
GLRX3	1.49366e-104	0.578838	0.267	0.041	2.53116e-100	9	GLRX3
RPS21	9.98336e-88	0.576302	0.974	0.597	1.69178e-83	9	RPS21
MRPS18C	7.05472e-89	0.576301	0.499	0.133	1.19549e-84	9	MRPS18C
HMGB2	4.63337e-68	0.573373	0.851	0.406	7.85171e-64	9	HMGB2
NOP56	5.84203e-113	0.570882	0.295	0.046	9.8999e-109	9	NOP56
RPS16	1.56882e-76	0.570827	0.956	0.608	2.65853e-72	9	RPS16
CPVL	1.67237e-83	0.570448	0.271	0.051	2.83399e-79	9	CPVL
VPS29	8.48923e-68	0.568812	0.549	0.184	1.43858e-63	9	VPS29
YWHAE	3.99854e-111	0.567691	0.384	0.074	6.77592e-107	9	YWHAE
CWC15	7.85413e-83	0.565116	0.349	0.078	1.33096e-78	9	CWC15
HTRA2	2.58093e-133	0.561775	0.269	0.033	4.37364e-129	9	HTRA2
PRELID1	5.03729e-105	0.561247	0.406	0.085	8.53619e-101	9	PRELID1
HINT2	2.71635e-114	0.561178	0.283	0.042	4.60313e-110	9	HINT2
ATP5J2	7.92405e-75	0.560698	0.838	0.332	1.34281e-70	9	ATP5J2
MAGOHB	2.28515e-111	0.558348	0.259	0.036	3.87242e-107	9	MAGOHB
FKBP3	2.18026e-109	0.558043	0.36	0.067	3.69466e-105	9	FKBP3
RNASEH2B	1.26028e-101	0.558023	0.398	0.085	2.13567e-97	9	RNASEH2B
ATP5J	1.95523e-67	0.557951	0.796	0.325	3.31333e-63	9	ATP5J
SNRPB2	1.44301e-88	0.553632	0.457	0.116	2.44532e-84	9	SNRPB2
PDAP1	2.1998e-143	0.55292	0.337	0.047	3.72778e-139	9	PDAP1
ESD	1.25513e-101	0.552465	0.404	0.086	2.12694e-97	9	ESD
COX6C	2.62619e-69	0.552384	0.804	0.326	4.45034e-65	9	COX6C
ATG3	4.67744e-104	0.551186	0.434	0.095	7.92639e-100	9	ATG3
PSMC4	4.12868e-135	0.550203	0.259	0.03	6.99646e-131	9	PSMC4
DEK	3.69612e-103	0.548554	0.426	0.093	6.26345e-99	9	DEK
TIMM23	1.50367e-123	0.548514	0.253	0.031	2.54811e-119	9	TIMM23
MRPS33	1.81853e-83	0.546465	0.285	0.055	3.08167e-79	9	MRPS33
DNAJC8	1.50245e-82	0.544653	0.345	0.077	2.54605e-78	9	DNAJC8
SF3B6	4.00442e-80	0.543916	0.57	0.174	6.7859e-76	9	SF3B6
NDUFB8	1.057e-80	0.542433	0.59	0.182	1.79119e-76	9	NDUFB8
MRPS34	1.56227e-98	0.540259	0.321	0.059	2.64742e-94	9	MRPS34
CHCHD2	1.25451e-63	0.539129	0.733	0.296	2.1259e-59	9	CHCHD2
MRPL51	1.26037e-75	0.537678	0.64	0.214	2.13583e-71	9	MRPL51
RPLP0P6	1.14959e-96	0.536053	0.4	0.088	1.94809e-92	9	RPLP0P6
HAUS1	8.54866e-89	0.536048	0.251	0.042	1.44866e-84	9	HAUS1
DRAP1	3.84435e-79	0.534928	0.356	0.084	6.51463e-75	9	DRAP1
POLR2I	8.32912e-92	0.534682	0.372	0.081	1.41145e-87	9	POLR2I
LSM2	4.84711e-112	0.531202	0.384	0.073	8.21392e-108	9	LSM2
BUB3	5.28768e-91	0.531185	0.321	0.063	8.9605e-87	9	BUB3
HSPA9	2.14467e-92	0.529589	0.269	0.046	3.63436e-88	9	HSPA9
HK1	2.7551e-144	0.527711	0.281	0.033	4.66879e-140	9	HK1
VDAC2	5.67403e-103	0.52764	0.339	0.063	9.61521e-99	9	VDAC2
DDX21	8.03922e-90	0.526451	0.263	0.045	1.36233e-85	9	DDX21
RPL3	5.7634e-75	0.523502	0.966	0.637	9.76665e-71	9	RPL3
XRCC6	2.70921e-94	0.522792	0.394	0.087	4.59102e-90	9	XRCC6
STRAP	3.04077e-112	0.522725	0.299	0.047	5.15289e-108	9	STRAP
RBM8A	2.28761e-93	0.52176	0.471	0.117	3.87658e-89	9	RBM8A
HNRNPA1	7.93833e-62	0.521203	0.818	0.359	1.34523e-57	9	HNRNPA1
PPA1	1.87185e-96	0.520659	0.402	0.088	3.17203e-92	9	PPA1
NOL7	3.27904e-90	0.519411	0.347	0.073	5.55666e-86	9	NOL7
NDUFB4	9.74303e-92	0.519359	0.57	0.159	1.65105e-87	9	NDUFB4
ETFA	6.98476e-108	0.518911	0.339	0.061	1.18364e-103	9	ETFA
PDHA1	1.42156e-97	0.518212	0.386	0.082	2.40897e-93	9	PDHA1
UQCRH	3.63088e-62	0.516115	0.747	0.3	6.15289e-58	9	UQCRH
MRPS36	1.25587e-89	0.515985	0.309	0.06	2.12819e-85	9	MRPS36
FDPS	1.8967e-90	0.515275	0.358	0.077	3.21414e-86	9	FDPS
TCEA1	2.59832e-125	0.514678	0.297	0.042	4.40311e-121	9	TCEA1
MRPS21	2.33908e-71	0.514573	0.475	0.141	3.9638e-67	9	MRPS21
MAP3K13	5.20543e-87	0.514538	0.261	0.046	8.82112e-83	9	MAP3K13
FIS1	1.26152e-102	0.513996	0.38	0.077	2.13777e-98	9	FIS1
HAGH	1.17761e-109	0.513541	0.265	0.038	1.99558e-105	9	HAGH
MDH1	1.22404e-79	0.510124	0.347	0.08	2.07427e-75	9	MDH1
PSMD14	1.74113e-91	0.50861	0.257	0.043	2.95052e-87	9	PSMD14
SDHD	1.11282e-88	0.505042	0.343	0.072	1.88578e-84	9	SDHD
PHB2	1.87072e-82	0.504886	0.35	0.079	3.17012e-78	9	PHB2
TUFM	2.366e-91	0.504512	0.37	0.081	4.00943e-87	9	TUFM
C14orf166	7.51435e-99	0.503816	0.469	0.112	1.27338e-94	9	C14orf166
RBBP7	7.09627e-93	0.503477	0.263	0.044	1.20253e-88	9	RBBP7
DSTN	5.32437e-82	0.503261	0.289	0.057	9.02268e-78	9	DSTN
C17orf89	3.92815e-97	0.502956	0.339	0.066	6.65664e-93	9	C17orf89
ATP5B	4.81866e-77	0.502653	0.533	0.16	8.1657e-73	9	ATP5B
PSMD7	4.56775e-79	0.502493	0.323	0.071	7.74051e-75	9	PSMD7
RNF5	5.20743e-104	0.50222	0.287	0.047	8.82451e-100	9	RNF5
NDUFS6	4.55409e-91	0.501732	0.491	0.126	7.71736e-87	9	NDUFS6
NDUFB9	5.47928e-65	0.501556	0.727	0.278	9.28518e-61	9	NDUFB9
EMC4	2.46089e-74	0.499671	0.301	0.066	4.17023e-70	9	EMC4
NDUFS8	5.72721e-88	0.499579	0.41	0.097	9.70533e-84	9	NDUFS8
GCLM	2.63873e-96	0.498814	0.301	0.054	4.4716e-92	9	GCLM
DLD	2.43677e-77	0.496507	0.253	0.048	4.12935e-73	9	DLD
NDUFA4	1.54281e-53	0.495559	0.824	0.371	2.61444e-49	9	NDUFA4
EIF2AK1	2.65847e-103	0.49364	0.293	0.049	4.50504e-99	9	EIF2AK1
PSMB2	4.37178e-80	0.491782	0.384	0.093	7.40842e-76	9	PSMB2
SNRPA1	3.19919e-90	0.491757	0.285	0.052	5.42134e-86	9	SNRPA1
HNRNPR	2.57141e-87	0.491613	0.305	0.06	4.35752e-83	9	HNRNPR
MAGOH	4.62604e-91	0.488754	0.305	0.058	7.83929e-87	9	MAGOH
COX6A1	9.67662e-66	0.488066	0.65	0.232	1.6398e-61	9	COX6A1
DNAJC15	1.73729e-86	0.487483	0.341	0.073	2.94401e-82	9	DNAJC15
SMC4	1.32132e-85	0.487262	0.349	0.076	2.23912e-81	9	SMC4
BTF3	1.73763e-52	0.487103	0.842	0.431	2.94459e-48	9	BTF3
PSMA7	6.63637e-56	0.486498	0.772	0.332	1.1246e-51	9	PSMA7
MRPL12	6.28928e-104	0.485356	0.255	0.038	1.06578e-99	9	MRPL12
ADRM1	5.19249e-102	0.485245	0.291	0.048	8.79919e-98	9	ADRM1
PARK7	1.6206e-77	0.484982	0.56	0.171	2.74627e-73	9	PARK7
VRK1	4.22044e-71	0.484631	0.285	0.062	7.15195e-67	9	VRK1
ST13	1.76164e-82	0.481908	0.364	0.084	2.98528e-78	9	ST13
WDR61	2.13485e-89	0.481676	0.309	0.06	3.61771e-85	9	WDR61
PSMD8	6.47615e-87	0.481636	0.374	0.085	1.09745e-82	9	PSMD8
DECR1	1.09314e-85	0.481312	0.337	0.072	1.85243e-81	9	DECR1
SF3B5	5.31496e-78	0.481209	0.552	0.166	9.00674e-74	9	SF3B5
GTF2A2	5.64261e-66	0.480849	0.412	0.119	9.56198e-62	9	GTF2A2
RPS3	6.6624e-76	0.480833	0.99	0.732	1.12901e-71	9	RPS3
UQCR10	4.25886e-63	0.479493	0.772	0.306	7.21706e-59	9	UQCR10
MRPL52	4.22775e-84	0.479255	0.374	0.086	7.16434e-80	9	MRPL52
PSMD9	6.34269e-117	0.479132	0.251	0.033	1.07483e-112	9	PSMD9
RPL18	8.17101e-55	0.478687	0.913	0.51	1.38466e-50	9	RPL18
LRRC59	4.42367e-96	0.47843	0.267	0.044	7.49635e-92	9	LRRC59
MORF4L2	4.6917e-69	0.478239	0.257	0.054	7.95056e-65	9	MORF4L2
MPST	4.97821e-117	0.475261	0.275	0.039	8.43608e-113	9	MPST
ATP1B3	7.32297e-87	0.474797	0.291	0.055	1.24095e-82	9	ATP1B3
EEF1B2	2.69132e-56	0.473426	0.851	0.426	4.56072e-52	9	EEF1B2
TCEB2	1.12625e-53	0.471674	0.754	0.318	1.90854e-49	9	TCEB2
SUB1	3.03904e-68	0.470747	0.735	0.27	5.14995e-64	9	SUB1
BSG	2.07382e-59	0.469998	0.489	0.163	3.51429e-55	9	BSG
FRG1	1.68813e-84	0.469676	0.321	0.067	2.8607e-80	9	FRG1
PRDX6	1.59415e-81	0.46894	0.446	0.116	2.70144e-77	9	PRDX6
NUDT1	2.91076e-79	0.467772	0.303	0.064	4.93257e-75	9	NUDT1
POLR2K	3.46058e-72	0.465869	0.378	0.097	5.8643e-68	9	POLR2K
C11orf58	1.70465e-65	0.464332	0.39	0.109	2.8887e-61	9	C11orf58
PSMC6	1.50298e-88	0.463616	0.271	0.048	2.54695e-84	9	PSMC6
MRPL11	1.72207e-105	0.463277	0.287	0.046	2.91822e-101	9	MRPL11
LSM6	2.23501e-65	0.463211	0.295	0.07	3.78745e-61	9	LSM6
RPS27A	6.70743e-79	0.462645	0.994	0.776	1.13664e-74	9	RPS27A
RPS23	1.04807e-68	0.461157	0.986	0.708	1.77607e-64	9	RPS23
RNPS1	1.43314e-84	0.460674	0.267	0.049	2.4286e-80	9	RNPS1
NDUFA9	1.04601e-71	0.460513	0.255	0.051	1.77257e-67	9	NDUFA9
MRPS16	3.48302e-93	0.459943	0.295	0.053	5.90232e-89	9	MRPS16
DPM2	8.40695e-113	0.458536	0.279	0.041	1.42464e-108	9	DPM2
HSD17B10	5.05123e-73	0.458272	0.273	0.057	8.55981e-69	9	HSD17B10
TIMM17A	4.60489e-69	0.456923	0.261	0.055	7.80344e-65	9	TIMM17A
HINT1	5.74634e-57	0.456223	0.774	0.327	9.73775e-53	9	HINT1
APEH	4.09556e-89	0.45547	0.251	0.042	6.94033e-85	9	APEH
LAGE3	5.58423e-66	0.455004	0.255	0.055	9.46303e-62	9	LAGE3
NDUFA10	2.61366e-84	0.454905	0.303	0.06	4.4291e-80	9	NDUFA10
SAP18	1.0306e-60	0.454397	0.503	0.167	1.74646e-56	9	SAP18
PSMF1	3.49962e-86	0.451801	0.303	0.059	5.93045e-82	9	PSMF1
GHITM	6.28187e-77	0.450529	0.442	0.118	1.06453e-72	9	GHITM
RPL29	3.47553e-60	0.450519	0.877	0.439	5.88963e-56	9	RPL29
MRPL55	3.74852e-98	0.450436	0.261	0.041	6.35224e-94	9	MRPL55
DNPH1	2.89824e-72	0.449698	0.261	0.053	4.91136e-68	9	DNPH1
HNRNPK	8.04194e-58	0.44886	0.679	0.264	1.36279e-53	9	HNRNPK
C1D	4.847e-100	0.448192	0.273	0.044	8.21373e-96	9	C1D
RSL1D1	3.42582e-76	0.446985	0.299	0.064	5.8054e-72	9	RSL1D1
POLR2L	2.11967e-61	0.44662	0.709	0.268	3.59198e-57	9	POLR2L
RPS6	1.06162e-71	0.446256	0.998	0.825	1.79903e-67	9	RPS6
RPL35A	1.57871e-62	0.445654	0.984	0.718	2.67528e-58	9	RPL35A
EIF4E2	2.44142e-69	0.445042	0.263	0.055	4.13723e-65	9	EIF4E2
NDUFS4	1.70404e-74	0.444407	0.269	0.054	2.88766e-70	9	NDUFS4
RPL23	1.50191e-51	0.443263	0.919	0.561	2.54513e-47	9	RPL23
SRSF10	8.67037e-59	0.442571	0.265	0.063	1.46928e-54	9	SRSF10
SRSF2	5.43649e-66	0.442215	0.481	0.148	9.21268e-62	9	SRSF2
APOBEC3C	6.01264e-86	0.440938	0.265	0.047	1.0189e-81	9	APOBEC3C
TOMM7	3.8414e-56	0.440457	0.677	0.264	6.50964e-52	9	TOMM7
RPL6	2.93135e-49	0.437843	0.903	0.517	4.96747e-45	9	RPL6
APEX1	1.74957e-76	0.436193	0.432	0.114	2.96483e-72	9	APEX1
PSMC5	9.80192e-78	0.434847	0.352	0.082	1.66103e-73	9	PSMC5
COMMD3	3.6317e-45	0.433784	0.285	0.085	6.15427e-41	9	COMMD3
PDCD5	1.60164e-49	0.432937	0.295	0.084	2.71414e-45	9	PDCD5
E2F4	1.04528e-89	0.43278	0.251	0.041	1.77133e-85	9	E2F4
CTB-63M22.1	1.81347e-73	0.432718	0.331	0.077	3.0731e-69	9	CTB-63M22.1
IK	4.46058e-69	0.43135	0.253	0.052	7.5589e-65	9	IK
EIF4A3	5.8055e-79	0.430632	0.285	0.057	9.838e-75	9	EIF4A3
APRT	7.21048e-67	0.428602	0.463	0.139	1.22189e-62	9	APRT
SLC39A3	2.28481e-92	0.428476	0.265	0.045	3.87183e-88	9	SLC39A3
RPL37A	4.13177e-56	0.428279	0.964	0.628	7.00169e-52	9	RPL37A
NDUFB11	1.10655e-71	0.427003	0.487	0.143	1.87516e-67	9	NDUFB11
RPL7A	2.57643e-47	0.426722	0.899	0.565	4.36603e-43	9	RPL7A
NDUFB7	1.80075e-83	0.426484	0.459	0.119	3.05155e-79	9	NDUFB7
PPDPF	2.60123e-82	0.426231	0.402	0.098	4.40805e-78	9	PPDPF
SLC25A37	1.01598e-74	0.425929	0.457	0.13	1.72169e-70	9	SLC25A37
PSMA1	2.66101e-68	0.425708	0.422	0.118	4.50934e-64	9	PSMA1
AURKAIP1	7.0627e-67	0.422465	0.37	0.098	1.19685e-62	9	AURKAIP1
NACA	3.8737e-44	0.422238	0.915	0.525	6.56437e-40	9	NACA
SEPT2	3.79391e-69	0.4218	0.251	0.051	6.42916e-65	9	SEPT2
HNRNPA2B1	4.57871e-48	0.418145	0.697	0.295	7.75908e-44	9	HNRNPA2B1
SUMO3	7.39873e-71	0.417376	0.352	0.088	1.25379e-66	9	SUMO3
SRP9	1.36231e-73	0.416927	0.552	0.168	2.30857e-69	9	SRP9
RPL7	1.08221e-53	0.416387	0.996	0.781	1.83391e-49	9	RPL7
RPL5	1.45656e-45	0.416169	0.919	0.591	2.46829e-41	9	RPL5
SRSF1	3.27008e-76	0.414463	0.349	0.082	5.54149e-72	9	SRSF1
EIF3D	2.19203e-79	0.414292	0.323	0.07	3.71462e-75	9	EIF3D
POLR2E	2.34234e-69	0.413137	0.263	0.055	3.96933e-65	9	POLR2E
COX7A2	2.90909e-51	0.41255	0.782	0.335	4.92974e-47	9	COX7A2
VDAC1	3.5223e-72	0.41143	0.265	0.054	5.96889e-68	9	VDAC1
ELOVL1	8.45813e-71	0.411415	0.271	0.057	1.43332e-66	9	ELOVL1
NDUFA2	1.9463e-64	0.409998	0.493	0.155	3.2982e-60	9	NDUFA2
RPL38	9.48556e-49	0.408792	0.941	0.553	1.60742e-44	9	RPL38
RPL36AL	5.09012e-37	0.406017	0.848	0.431	8.62572e-33	9	RPL36AL
NDUFAF3	1.37006e-70	0.405995	0.358	0.09	2.32171e-66	9	NDUFAF3
COX7C	1.21853e-41	0.404199	0.844	0.434	2.06492e-37	9	COX7C
COMMD4	2.52234e-80	0.403799	0.261	0.049	4.27436e-76	9	COMMD4
UQCRC2	2.30255e-78	0.403484	0.307	0.065	3.9019e-74	9	UQCRC2
NDUFB3	7.14228e-63	0.401417	0.463	0.143	1.21033e-58	9	NDUFB3
PRPF40A	1.25227e-74	0.401298	0.267	0.054	2.12209e-70	9	PRPF40A
RPL27	5.1646e-52	0.400951	0.97	0.685	8.75193e-48	9	RPL27
SLC25A3	1.68936e-58	0.400833	0.517	0.173	2.86279e-54	9	SLC25A3
RBM3	1.83034e-67	0.400564	0.436	0.125	3.1017e-63	9	RBM3
RP11-620J15.3	1.91915e-48	0.400554	0.319	0.095	3.25218e-44	9	RP11-620J15.3
RPS17	1.00608e-46	0.399964	0.952	0.68	1.7049e-42	9	RPS17
USMG5	3.45823e-50	0.398669	0.693	0.284	5.86032e-46	9	USMG5
COPS5	2.75203e-82	0.398628	0.257	0.046	4.6636e-78	9	COPS5
MORF4L1	3.2457e-54	0.39786	0.412	0.131	5.50016e-50	9	MORF4L1
FUS	7.23677e-72	0.397362	0.418	0.113	1.22634e-67	9	FUS
TMA7	5.13994e-34	0.396767	0.851	0.455	8.71015e-30	9	TMA7
COPS9	8.94154e-55	0.395757	0.459	0.152	1.51523e-50	9	COPS9
NDUFB5	2.40152e-54	0.395193	0.287	0.075	4.06962e-50	9	NDUFB5
UQCRC1	4.17763e-76	0.39455	0.333	0.076	7.07942e-72	9	UQCRC1
CHCHD1	6.26446e-76	0.392876	0.305	0.066	1.06157e-71	9	CHCHD1
TMPO	2.54746e-66	0.391944	0.301	0.071	4.31692e-62	9	TMPO
HNRNPM	1.289e-63	0.391677	0.325	0.082	2.18434e-59	9	HNRNPM
UBE2L6	7.0028e-46	0.390428	0.251	0.068	1.1867e-41	9	UBE2L6
RPL3P4	4.6965e-61	0.390041	0.632	0.226	7.95869e-57	9	RPL3P4
BUD31	1.69791e-71	0.389641	0.333	0.079	2.87728e-67	9	BUD31
UQCRFS1	5.19734e-72	0.387113	0.406	0.108	8.80741e-68	9	UQCRFS1
RPL36	9.7801e-50	0.386088	0.978	0.642	1.65734e-45	9	RPL36
BNIP3L	4.9322e-79	0.385329	0.36	0.083	8.35811e-75	9	BNIP3L
NDFIP1	1.89442e-71	0.383654	0.307	0.069	3.21028e-67	9	NDFIP1
MED4	1.17278e-64	0.383237	0.283	0.065	1.9874e-60	9	MED4
HNRNPD	1.27198e-53	0.38312	0.418	0.134	2.15549e-49	9	HNRNPD
TOMM22	1.06889e-67	0.382436	0.265	0.057	1.81134e-63	9	TOMM22
SUMO1	6.78741e-62	0.382098	0.327	0.085	1.15019e-57	9	SUMO1
TRA2B	1.56962e-74	0.381882	0.358	0.086	2.65987e-70	9	TRA2B
DYNLL1	4.22061e-51	0.378279	0.562	0.209	7.15225e-47	9	DYNLL1
RPS3A	4.51389e-52	0.378156	0.988	0.725	7.64924e-48	9	RPS3A
KARS	1.94815e-76	0.377419	0.293	0.061	3.30134e-72	9	KARS
AP2M1	2.20465e-68	0.377157	0.362	0.093	3.736e-64	9	AP2M1
BANF1	2.05555e-64	0.375787	0.388	0.108	3.48333e-60	9	BANF1
FAM96A	5.59145e-54	0.375127	0.374	0.114	9.47527e-50	9	FAM96A
LSM7	1.89257e-48	0.374459	0.39	0.128	3.20715e-44	9	LSM7
UBE2I	6.2616e-57	0.371111	0.382	0.113	1.06109e-52	9	UBE2I
ECHS1	2.49694e-58	0.370658	0.255	0.059	4.23131e-54	9	ECHS1
SUPT4H1	1.5744e-58	0.368845	0.41	0.123	2.66798e-54	9	SUPT4H1
RPSAP58	1.75514e-67	0.368792	0.319	0.077	2.97426e-63	9	RPSAP58
H1F0	1.66758e-51	0.367527	0.259	0.066	2.82588e-47	9	H1F0
EWSR1	4.33584e-63	0.367411	0.323	0.082	7.34751e-59	9	EWSR1
COPS6	4.01681e-65	0.366901	0.251	0.053	6.80688e-61	9	COPS6
UBE2N	5.86635e-66	0.366486	0.275	0.061	9.94112e-62	9	UBE2N
MPP1	5.70588e-71	0.366238	0.275	0.058	9.66919e-67	9	MPP1
SEC13	1.13889e-56	0.365885	0.253	0.06	1.92997e-52	9	SEC13
SHFM1	1.34793e-42	0.365694	0.602	0.251	2.2842e-38	9	SHFM1
PTBP1	3.42703e-63	0.365492	0.277	0.064	5.80744e-59	9	PTBP1
HAX1	4.16565e-70	0.364955	0.251	0.05	7.05911e-66	9	HAX1
PFDN2	6.86352e-70	0.36058	0.281	0.061	1.16309e-65	9	PFDN2
C19orf53	2.53914e-64	0.360316	0.406	0.114	4.30283e-60	9	C19orf53
RPS13	1.25914e-42	0.356703	0.958	0.634	2.13374e-38	9	RPS13
NDUFS3	2.75276e-67	0.354268	0.271	0.059	4.66484e-63	9	NDUFS3
THOC7	5.42247e-72	0.353639	0.352	0.086	9.18891e-68	9	THOC7
PSMB3	2.75142e-53	0.352306	0.564	0.202	4.66256e-49	9	PSMB3
SPCS2	1.2786e-42	0.350978	0.301	0.094	2.16672e-38	9	SPCS2
RPL21	3.29251e-55	0.347787	1	0.837	5.57949e-51	9	RPL21
MRPL57	5.22099e-65	0.346365	0.436	0.126	8.8475e-61	9	MRPL57
MRPS18B	2.82488e-55	0.345568	0.251	0.06	4.78705e-51	9	MRPS18B
PSMG2	3.22673e-62	0.345464	0.279	0.065	5.46801e-58	9	PSMG2
RPS2	1.84396e-34	0.34404	0.901	0.6	3.12477e-30	9	RPS2
DYNC1I2	2.65595e-52	0.343589	0.251	0.062	4.50078e-48	9	DYNC1I2
MKKS	2.99389e-54	0.343356	0.273	0.069	5.07344e-50	9	MKKS
C11orf31	4.01774e-57	0.342769	0.35	0.099	6.80847e-53	9	C11orf31
TOP2A	1.89605e-55	0.342768	0.251	0.06	3.21304e-51	9	TOP2A
NDUFA12	9.54614e-43	0.342527	0.444	0.162	1.61769e-38	9	NDUFA12
LARP7	5.37493e-48	0.342066	0.297	0.085	9.10836e-44	9	LARP7
UQCRB	1.82715e-41	0.340823	0.721	0.32	3.09629e-37	9	UQCRB
MMADHC	7.91818e-46	0.339946	0.329	0.102	1.34181e-41	9	MMADHC
RBMX	1.70141e-49	0.339686	0.309	0.089	2.88321e-45	9	RBMX
SUMO2	1.91969e-46	0.338502	0.539	0.202	3.2531e-42	9	SUMO2
RWDD1	6.87633e-60	0.333907	0.279	0.067	1.16526e-55	9	RWDD1
EIF3K	1.93092e-60	0.331494	0.564	0.19	3.27213e-56	9	EIF3K
RPL26	8.17115e-42	0.331367	0.964	0.642	1.38468e-37	9	RPL26
RPS12	3.69005e-35	0.329955	0.95	0.738	6.25316e-31	9	RPS12
EIF5	2.50695e-49	0.329147	0.295	0.083	4.24828e-45	9	EIF5
RPL10A	1.83295e-34	0.327343	0.824	0.47	3.10613e-30	9	RPL10A
RSL24D1	1.73075e-58	0.327098	0.347	0.095	2.93293e-54	9	RSL24D1
PPIAP22	1.45396e-79	0.325394	0.339	0.075	2.46389e-75	9	PPIAP22
ATF4	3.15821e-55	0.325334	0.347	0.099	5.3519e-51	9	ATF4
HN1	4.54368e-49	0.324696	0.339	0.102	7.69971e-45	9	HN1
PSMB7	3.89435e-51	0.324047	0.515	0.182	6.59936e-47	9	PSMB7
SNHG9	2.09719e-64	0.322844	0.255	0.055	3.5539e-60	9	SNHG9
HNRNPA0	4.51901e-51	0.322278	0.341	0.1	7.65792e-47	9	HNRNPA0
RPS18	4.34441e-52	0.321489	0.982	0.715	7.36203e-48	9	RPS18
DARS	3.19561e-48	0.320122	0.251	0.065	5.41528e-44	9	DARS
TMEM50A	9.74861e-43	0.318782	0.307	0.096	1.652e-38	9	TMEM50A
NDUFC2	1.92249e-52	0.318627	0.473	0.159	3.25786e-48	9	NDUFC2
GLRX	1.93444e-25	0.318046	0.541	0.266	3.2781e-21	9	GLRX
POLR2J	1.43443e-54	0.318034	0.315	0.086	2.43079e-50	9	POLR2J
C14orf2	1.22206e-32	0.317164	0.772	0.373	2.0709e-28	9	C14orf2
PCMT1	2.02455e-56	0.317081	0.44	0.137	3.4308e-52	9	PCMT1
SRSF11	7.50387e-50	0.312146	0.313	0.09	1.27161e-45	9	SRSF11
HNRNPA3	1.01479e-46	0.311891	0.35	0.11	1.71966e-42	9	HNRNPA3
RPS10	1.85226e-35	0.311583	0.867	0.464	3.13883e-31	9	RPS10
ATP5H	1.02446e-53	0.31061	0.501	0.169	1.73605e-49	9	ATP5H
NAA38	7.61593e-40	0.308987	0.459	0.176	1.2906e-35	9	NAA38
PSMD4	1.6878e-50	0.308583	0.311	0.088	2.86014e-46	9	PSMD4
GSTO1	1.42253e-44	0.306768	0.495	0.183	2.41062e-40	9	GSTO1
RPS15	1.67356e-37	0.305464	0.964	0.683	2.83602e-33	9	RPS15
HSPB11	1.94405e-32	0.305096	0.271	0.093	3.29439e-28	9	HSPB11
DDT	1.1723e-55	0.305061	0.374	0.11	1.98659e-51	9	DDT
RPL36A	3.80935e-39	0.304717	0.933	0.573	6.45532e-35	9	RPL36A
RBM17	6.03065e-56	0.302276	0.273	0.067	1.02195e-51	9	RBM17
FAM96B	1.6597e-48	0.301152	0.285	0.079	2.81253e-44	9	FAM96B
C19orf70	2.808e-44	0.301067	0.265	0.075	4.75843e-40	9	C19orf70
RPS15A	4.5203e-30	0.299776	0.929	0.674	7.6601e-26	9	RPS15A
HNRNPH3	5.6587e-51	0.299255	0.384	0.12	9.58924e-47	9	HNRNPH3
RPS27L	1.40913e-42	0.296894	0.566	0.223	2.38791e-38	9	RPS27L
RPS25	1.02849e-36	0.294325	0.947	0.654	1.74288e-32	9	RPS25
UBL5	2.39903e-31	0.293721	0.78	0.388	4.06539e-27	9	UBL5
MRPL34	3.58152e-50	0.2919	0.255	0.065	6.06924e-46	9	MRPL34
RPS19	2.25631e-34	0.291793	0.998	0.801	3.82354e-30	9	RPS19
RPL14P1	3.56779e-64	0.291088	0.39	0.108	6.04599e-60	9	RPL14P1
RPL32	5.01272e-40	0.290025	0.988	0.76	8.49455e-36	9	RPL32
RPL12	1.33093e-31	0.288512	0.883	0.53	2.25539e-27	9	RPL12
UBE2D3	3.09126e-44	0.287781	0.44	0.156	5.23845e-40	9	UBE2D3
COX5B	6.71608e-39	0.287401	0.677	0.291	1.13811e-34	9	COX5B
PAIP2	5.99816e-39	0.284485	0.299	0.097	1.01645e-34	9	PAIP2
ATP5D	4.73254e-51	0.282712	0.352	0.105	8.01976e-47	9	ATP5D
C1orf43	1.00959e-52	0.282498	0.309	0.085	1.71085e-48	9	C1orf43
SLC4A1	1.34332e-58	0.282491	0.372	0.11	2.27639e-54	9	SLC4A1
RPL13A	4.37728e-33	0.282405	0.95	0.677	7.41773e-29	9	RPL13A
PCBP1	9.63851e-33	0.28239	0.578	0.257	1.63334e-28	9	PCBP1
NDUFB10	3.11744e-53	0.281851	0.394	0.121	5.28282e-49	9	NDUFB10
RPS4Y1	3.16817e-50	0.278764	0.4	0.128	5.36878e-46	9	RPS4Y1
RPS7P1	4.29919e-57	0.276936	0.4	0.119	7.2854e-53	9	RPS7P1
PAPOLA	3.97389e-42	0.27688	0.275	0.081	6.73416e-38	9	PAPOLA
CSNK2B	3.30251e-44	0.273803	0.349	0.112	5.59643e-40	9	CSNK2B
RPS8	3.34453e-30	0.273235	0.941	0.641	5.66764e-26	9	RPS8
NDUFA11	1.85991e-45	0.272895	0.469	0.168	3.1518e-41	9	NDUFA11
DGUOK	8.74422e-40	0.271468	0.265	0.08	1.4818e-35	9	DGUOK
ENY2	3.99218e-46	0.271115	0.45	0.157	6.76515e-42	9	ENY2
OST4	4.72906e-32	0.267832	0.78	0.371	8.01386e-28	9	OST4
RPS20	4.25222e-29	0.267092	0.96	0.69	7.20581e-25	9	RPS20
MDH2	9.01791e-43	0.266146	0.261	0.075	1.52817e-38	9	MDH2
AK2	3.42716e-40	0.262372	0.349	0.118	5.80767e-36	9	AK2
GUK1	9.35195e-51	0.262142	0.386	0.12	1.58478e-46	9	GUK1
EIF3G	5.71302e-58	0.260516	0.291	0.072	9.68128e-54	9	EIF3G
EID1	1.18158e-44	0.259224	0.309	0.093	2.0023e-40	9	EID1
SDHB	9.09078e-44	0.25901	0.253	0.07	1.54052e-39	9	SDHB
AP2S1	3.41716e-43	0.256073	0.392	0.134	5.79071e-39	9	AP2S1
RPL19	2.2737e-34	0.254125	0.962	0.703	3.85301e-30	9	RPL19
HNRNPF	1.63301e-39	0.25283	0.388	0.138	2.76729e-35	9	HNRNPF
RPL34	3.93642e-28	0.251915	0.998	0.868	6.67066e-24	9	RPL34
TESC	1.2963e-50	0.251562	0.271	0.071	2.19672e-46	9	TESC
RP11-632C17--A.1	3.27116e-46	0.250466	0.505	0.186	5.54331e-42	9	RP11-632C17--A.1
RPS28	3.9107e-20	0.250139	0.824	0.568	6.62707e-16	9	RPS28
HBB	9.08593e-83	0.805781	0.957	0.779	1.5397e-78	10	HBB		Erythroid cell_HBB high
HBG2	7.82326e-75	0.724132	0.456	0.144	1.32573e-70	10	HBG2
HBA1	2.55765e-96	0.655401	0.942	0.698	4.3342e-92	10	HBA1
HBA2	2.75972e-97	0.635949	0.945	0.722	4.67662e-93	10	HBA2
HBD	7.11562e-75	0.588293	0.756	0.376	1.20581e-70	10	HBD
AHSP	3.65943e-59	0.564519	0.65	0.282	6.20127e-55	10	AHSP
EEF1D	2.23033e-07	0.500828	0.363	0.283	0.00377952	10	EEF1D
IGLC3	3.74014e-99	0.456303	0.499	0.139	6.33804e-95	10	IGLC3
IGHA1	1.83686e-105	0.439192	0.718	0.298	3.11275e-101	10	IGHA1
IGHG1	2.59113e-83	0.390972	0.494	0.153	4.39093e-79	10	IGHG1
HBM	3.22024e-32	0.389142	0.416	0.181	5.45701e-28	10	HBM
SLC4A1	5.25498e-17	0.378411	0.254	0.117	8.90509e-13	10	SLC4A1
FTH1	6.25002e-20	0.360165	0.703	0.491	1.05913e-15	10	FTH1
S100A9	1.97056e-32	0.329051	0.982	0.952	3.33931e-28	10	S100A9
RPS12	3.17513e-17	0.325923	0.824	0.745	5.38058e-13	10	RPS12
RPL8	5.21538e-09	0.299392	0.675	0.605	8.83798e-05	10	RPL8
PRDX2	1.14608e-17	0.294205	0.418	0.232	1.94215e-13	10	PRDX2
IGKC	5.67742e-57	0.286062	0.899	0.618	9.62096e-53	10	IGKC
CA1	3.76089e-41	0.268012	0.559	0.262	6.3732e-37	10	CA1
RPL5	2.76431e-09	0.263312	0.703	0.603	4.6844e-05	10	RPL5
TRAC	2.89333e-257	1.91529	0.432	0.038	4.90303e-253	11	TRAC		T cell_TRAC high
TRBC2	5.71751e-219	1.90605	0.435	0.047	9.68888e-215	11	TRBC2
IL7R	0	1.7604	0.326	0.011	0	11	IL7R
CD52	2.41846e-160	1.65467	0.573	0.116	4.09832e-156	11	CD52
CD3D	2.65378e-150	1.56423	0.302	0.031	4.4971e-146	11	CD3D
LTB	4.94769e-126	1.52853	0.359	0.054	8.38436e-122	11	LTB
EVL	1.95515e-159	1.46272	0.277	0.024	3.3132e-155	11	EVL
CD3E	9.01872e-183	1.45884	0.261	0.018	1.52831e-178	11	CD3E
IFITM1	9.51825e-130	1.41381	0.432	0.075	1.61296e-125	11	IFITM1
BTG1	2.25887e-95	1.39366	0.601	0.208	3.82788e-91	11	BTG1
DDIT4	1.10592e-97	1.36895	0.283	0.043	1.87409e-93	11	DDIT4
TXNIP	4.33237e-83	1.27822	0.568	0.197	7.34163e-79	11	TXNIP
RPS27	7.72294e-166	1.13086	0.995	0.902	1.30873e-161	11	RPS27
RPL10	8.75106e-125	1.04606	0.976	0.728	1.48295e-120	11	RPL10
SARAF	5.08934e-30	1.00285	0.321	0.133	8.6244e-26	11	SARAF
RPL3	9.89854e-99	0.986183	0.938	0.642	1.67741e-94	11	RPL3
LIMD2	8.37384e-37	0.979631	0.288	0.095	1.41903e-32	11	LIMD2
RPS12	2.32281e-117	0.977525	0.97	0.74	3.93623e-113	11	RPS12
RPS29	3.19971e-133	0.973663	0.992	0.808	5.42224e-129	11	RPS29
RPL13A	1.87711e-104	0.953295	0.965	0.681	3.18096e-100	11	RPL13A
RPS16	3.04858e-90	0.920055	0.913	0.614	5.16613e-86	11	RPS16
EEF1A1	5.4772e-115	0.903485	0.976	0.806	9.28166e-111	11	EEF1A1
RPLP2	2.47707e-112	0.892064	0.986	0.795	4.19765e-108	11	RPLP2
RPS28	4.3421e-80	0.890956	0.889	0.569	7.35812e-76	11	RPS28
RPS4Y1	1.92849e-24	0.884136	0.307	0.135	3.26801e-20	11	RPS4Y1
RPS15A	8.03366e-96	0.875258	0.948	0.677	1.36138e-91	11	RPS15A
RPL23A	4.82228e-76	0.872647	0.878	0.532	8.17183e-72	11	RPL23A
RPS25	3.62199e-78	0.853319	0.908	0.66	6.13782e-74	11	RPS25
RPL21	3.07947e-119	0.851788	0.984	0.84	5.21846e-115	11	RPL21
RPL30	4.93904e-88	0.845943	0.943	0.739	8.3697e-84	11	RPL30
RPS27A	8.99148e-94	0.834916	0.978	0.779	1.5237e-89	11	RPS27A
RPL13	8.48864e-99	0.821854	0.976	0.746	1.43848e-94	11	RPL13
LDHB	1.52263e-33	0.793516	0.492	0.249	2.58025e-29	11	LDHB
RPL9P9	1.28251e-48	0.785489	0.698	0.394	2.17334e-44	11	RPL9P9
RP11-543P15.1	2.70715e-39	0.783522	0.603	0.33	4.58754e-35	11	RP11-543P15.1
RP11-761N21.2	9.24075e-23	0.777951	0.34	0.158	1.56594e-18	11	RP11-761N21.2
RPSA	3.05483e-40	0.771515	0.696	0.424	5.17671e-36	11	RPSA
RPL9	3.32127e-70	0.768737	0.91	0.628	5.62823e-66	11	RPL9
RPL11	5.286e-75	0.751208	0.951	0.722	8.95765e-71	11	RPL11
RPL10A	1.10429e-42	0.745472	0.736	0.478	1.87133e-38	11	RPL10A
RPL3P4	1.10495e-18	0.739321	0.399	0.24	1.87245e-14	11	RPL3P4
TOMM7	2.1721e-17	0.723757	0.432	0.278	3.68084e-13	11	TOMM7
DDX5	2.04417e-21	0.721512	0.413	0.234	3.46405e-17	11	DDX5
RPL19	2.17021e-70	0.714258	0.959	0.706	3.67764e-66	11	RPL19
EEF1D	4.57293e-24	0.705415	0.481	0.279	7.74929e-20	11	EEF1D
RPL13AP5	1.87829e-22	0.697691	0.394	0.204	3.18295e-18	11	RPL13AP5
RPL34	3.94082e-89	0.69448	0.992	0.87	6.67812e-85	11	RPL34
RPL22	6.67565e-40	0.6829	0.696	0.413	1.13126e-35	11	RPL22
HSPA8	5.09328e-19	0.676358	0.389	0.219	8.63107e-15	11	HSPA8
RPS3A	4.24719e-67	0.676102	0.946	0.73	7.19729e-63	11	RPS3A
RP11-864N7.2	1.42982e-18	0.669873	0.345	0.179	2.42298e-14	11	RP11-864N7.2
RPS3	8.50229e-60	0.669147	0.935	0.737	1.4408e-55	11	RPS3
EEF2	4.3116e-17	0.665521	0.429	0.273	7.30643e-13	11	EEF2
RPL32	2.02037e-63	0.662787	0.948	0.764	3.42372e-59	11	RPL32
HLA-E	4.72866e-27	0.659648	0.527	0.304	8.01319e-23	11	HLA-E
RPS10	1.07639e-34	0.657672	0.715	0.475	1.82406e-30	11	RPS10
RPL35A	2.62681e-51	0.652842	0.927	0.723	4.4514e-47	11	RPL35A
MTATP6P1	4.94602e-28	0.64961	0.562	0.325	8.38152e-24	11	MTATP6P1
RPL41	2.54991e-55	0.644726	0.889	0.603	4.32108e-51	11	RPL41
RPL14	1.91127e-39	0.644676	0.764	0.497	3.23885e-35	11	RPL14
RPL4	4.89762e-25	0.640053	0.63	0.44	8.2995e-21	11	RPL4
RP4-765C7.2	3.00579e-14	0.638799	0.334	0.191	5.09361e-10	11	RP4-765C7.2
RPS18	1.00308e-63	0.6382	0.951	0.719	1.69983e-59	11	RPS18
RP11-425L10.1	8.74703e-14	0.630481	0.329	0.192	1.48227e-09	11	RP11-425L10.1
RPL38	3.4149e-42	0.623965	0.821	0.562	5.78688e-38	11	RPL38
TMSB10	1.37879e-59	0.623865	0.948	0.722	2.3365e-55	11	TMSB10
RPL24	5.29045e-29	0.621138	0.704	0.517	8.9652e-25	11	RPL24
RPL27A	1.08858e-68	0.621055	0.965	0.795	1.8447e-64	11	RPL27A
SRSF5	1.29233e-11	0.614591	0.274	0.16	2.18998e-07	11	SRSF5
RPL18	7.15724e-29	0.612201	0.715	0.523	1.21287e-24	11	RPL18
RPL5	4.96262e-37	0.609411	0.815	0.599	8.40966e-33	11	RPL5
RPS5	4.10698e-28	0.60292	0.663	0.438	6.95969e-24	11	RPS5
GAS5	8.76794e-17	0.595958	0.459	0.298	1.48582e-12	11	GAS5
RPL6	9.74829e-29	0.59545	0.734	0.529	1.65195e-24	11	RPL6
RPS13	5.20913e-43	0.58934	0.87	0.642	8.82739e-39	11	RPS13
RPL23	5.09513e-35	0.585756	0.78	0.571	8.6342e-31	11	RPL23
RPS6	7.27655e-63	0.578716	0.978	0.828	1.23308e-58	11	RPS6
RPL28	7.56208e-42	0.575489	0.875	0.682	1.28147e-37	11	RPL28
RPS4X	1.6427e-34	0.57308	0.821	0.607	2.78373e-30	11	RPS4X
RPS15	9.25501e-44	0.56092	0.908	0.688	1.56835e-39	11	RPS15
RPL39	9.99763e-38	0.559365	0.878	0.686	1.6942e-33	11	RPL39
RPS21	5.31403e-34	0.554222	0.823	0.607	9.00515e-30	11	RPS21
ANAPC16	1.55952e-08	0.553117	0.28	0.182	0.000264276	11	ANAPC16
RPS20	4.30035e-38	0.55138	0.87	0.697	7.28738e-34	11	RPS20
RP11-371A22.1	8.48226e-08	0.544262	0.264	0.172	0.0014374	11	RP11-371A22.1
RPL27	1.2144e-32	0.541548	0.845	0.693	2.05793e-28	11	RPL27
ZFP36L2	6.70553e-07	0.534801	0.302	0.213	0.0113632	11	ZFP36L2
RPL7P1	3.34902e-11	0.530916	0.299	0.177	5.67524e-07	11	RPL7P1
RPL18A	3.75017e-34	0.530103	0.804	0.575	6.35505e-30	11	RPL18A
RPS9	1.32171e-27	0.525477	0.78	0.577	2.23977e-23	11	RPS9
EEF1B2	2.45903e-19	0.519831	0.614	0.44	4.16708e-15	11	EEF1B2
FAU	1.37666e-24	0.515393	0.755	0.596	2.33288e-20	11	FAU
RPL37	3.22755e-35	0.513532	0.859	0.687	5.46941e-31	11	RPL37
RPL10AP6	3.72447e-08	0.511213	0.28	0.179	0.000631148	11	RPL10AP6
RPL31	4.62514e-48	0.503993	0.962	0.799	7.83776e-44	11	RPL31
RPL13P12	9.49507e-17	0.49531	0.459	0.278	1.60903e-12	11	RPL13P12
RPS27AP16	2.31586e-09	0.493909	0.266	0.157	3.92445e-05	11	RPS27AP16
EIF3H	2.65689e-06	0.493586	0.255	0.176	0.0450237	11	EIF3H
RPS19	3.26439e-46	0.488127	0.978	0.804	5.53184e-42	11	RPS19
HNRNPA1	5.46374e-10	0.479726	0.489	0.377	9.25885e-06	11	HNRNPA1
RACK1	4.26529e-19	0.478886	0.682	0.527	7.22795e-15	11	RACK1
RPS11	3.41337e-32	0.470542	0.886	0.678	5.78429e-28	11	RPS11
UBA52	2.6142e-23	0.466688	0.761	0.606	4.43002e-19	11	UBA52
SELL	2.12973e-08	0.46466	0.255	0.154	0.000360905	11	SELL
RPL36	3.48915e-30	0.463525	0.848	0.651	5.91272e-26	11	RPL36
RPS14	7.43093e-42	0.449427	0.986	0.894	1.25925e-37	11	RPS14
RPL12	6.93312e-22	0.4452	0.731	0.54	1.17489e-17	11	RPL12
RP11-475C16.1	6.08342e-12	0.442287	0.348	0.211	1.0309e-07	11	RP11-475C16.1
CORO1A	5.71694e-08	0.440602	0.383	0.276	0.000968793	11	CORO1A
RPL26	4.50466e-24	0.438658	0.821	0.652	7.63359e-20	11	RPL26
RPS17	5.45108e-28	0.434334	0.853	0.687	9.23741e-24	11	RPS17
PABPC1	1.3988e-11	0.427405	0.628	0.528	2.3704e-07	11	PABPC1
CD37	4.37398e-06	0.416817	0.274	0.188	0.0741214	11	CD37
RPS8	2.03335e-25	0.414175	0.84	0.649	3.44572e-21	11	RPS8
RPS2	3.01339e-23	0.409062	0.796	0.607	5.10649e-19	11	RPS2
EIF3K	0.000458919	0.40873	0.261	0.206	1	11	EIF3K
TPT1	5.64007e-32	0.406279	0.924	0.858	9.55766e-28	11	TPT1
RPS23	7.8512e-28	0.403949	0.899	0.715	1.33046e-23	11	RPS23
AC007969.5	2.29364e-06	0.397439	0.304	0.213	0.038868	11	AC007969.5
RPL7	5.46959e-28	0.396609	0.932	0.786	9.26876e-24	11	RPL7
MT-ND4L	1.62855e-05	0.390752	0.266	0.19	0.275974	11	MT-ND4L
NPM1	2.04728e-08	0.389627	0.424	0.307	0.000346933	11	NPM1
RPL8	3.56265e-17	0.388938	0.753	0.603	6.03727e-13	11	RPL8
RPL36A	6.63546e-17	0.378172	0.745	0.585	1.12445e-12	11	RPL36A
RPS7	1.12308e-10	0.368558	0.59	0.47	1.90318e-06	11	RPS7
HLA-A	1.37381e-11	0.367535	0.644	0.529	2.32805e-07	11	HLA-A
RPL7A	9.99687e-16	0.35643	0.747	0.575	1.69407e-11	11	RPL7A
SNHG5	1.9177e-05	0.334568	0.348	0.269	0.324973	11	SNHG5
SLC25A6	0.00204763	0.325786	0.283	0.238	1	11	SLC25A6
RPL15	5.2972e-18	0.325153	0.856	0.737	8.97664e-14	11	RPL15
PCBP1	0.00124439	0.323172	0.323	0.271	1	11	PCBP1
MT-ND5	2.32518e-05	0.322528	0.424	0.345	0.394025	11	MT-ND5
RPLP1	7.00799e-24	0.320599	0.954	0.859	1.18757e-19	11	RPLP1
RPL37A	7.06676e-14	0.314227	0.772	0.64	1.19753e-09	11	RPL37A
RPS3AP26	4.04463e-05	0.313069	0.285	0.208	0.685403	11	RPS3AP26
RPL7P9	0.000119656	0.310994	0.31	0.24	1	11	RPL7P9
ITM2B	0.000176373	0.306775	0.337	0.269	1	11	ITM2B
COX7C	4.99883e-07	0.301519	0.53	0.451	0.00847102	11	COX7C
RP11-632C17--A.1	0.000683537	0.280554	0.261	0.199	1	11	RP11-632C17--A.1
RPL15P3	2.90613e-05	0.271182	0.277	0.196	0.492473	11	RPL15P3
HLA-C	1.90759e-10	0.266887	0.704	0.572	3.2326e-06	11	HLA-C
RPL29	4.37303e-07	0.265489	0.554	0.456	0.00741054	11	RPL29
MIF	0.000599759	0.262127	0.253	0.188	1	11	MIF
RPLP0	4.86744e-10	0.253049	0.774	0.629	8.24836e-06	11	RPLP0
BTF3	4.35973e-05	0.252552	0.514	0.448	0.7388	11	BTF3
CCL5	0	3.21999	0.825	0.044	0	12	CCL5		T cell_CCL5 high
GNLY	0	3.02534	0.575	0.021	0	12	GNLY
GZMA	0	2.49893	0.567	0.013	0	12	GZMA
GZMB	0	2.45828	0.452	0.015	0	12	GZMB
GZMH	0	2.12132	0.377	0.01	0	12	GZMH
CCL4	0	2.10929	0.333	0.005	0	12	CCL4
IL32	0	1.91709	0.456	0.022	0	12	IL32
PRF1	0	1.90586	0.345	0.006	0	12	PRF1
CD52	5.33195e-135	1.75609	0.623	0.12	9.03552e-131	12	CD52
CD3D	6.68722e-183	1.7138	0.393	0.032	1.13322e-178	12	CD3D
KLRD1	0	1.69248	0.282	0.004	0	12	KLRD1
TRAC	9.27026e-152	1.6731	0.409	0.043	1.57094e-147	12	TRAC
TRBC2	4.62539e-143	1.66393	0.433	0.051	7.83818e-139	12	TRBC2
FGFBP2	0	1.6329	0.258	0.004	0	12	FGFBP2
FCGR3A	1.21807e-107	1.59917	0.325	0.038	2.06414e-103	12	FCGR3A
TRBC1	1.71877e-131	1.50321	0.298	0.025	2.91264e-127	12	TRBC1
CD2	1.51222e-180	1.49565	0.274	0.014	2.56261e-176	12	CD2
ARL4C	5.80428e-192	1.48599	0.282	0.014	9.83594e-188	12	ARL4C
IFITM1	1.20079e-81	1.41775	0.421	0.08	2.03486e-77	12	IFITM1
NKG7	2.46318e-81	1.41424	0.758	0.307	4.1741e-77	12	NKG7
GIMAP4	2.10414e-126	1.4125	0.302	0.027	3.56568e-122	12	GIMAP4
RARRES3	1.08701e-88	1.34726	0.294	0.037	1.84204e-84	12	RARRES3
CD3E	6.00568e-116	1.28707	0.254	0.021	1.01772e-111	12	CD3E
GIMAP7	3.93175e-103	1.2574	0.262	0.025	6.66275e-99	12	GIMAP7
PCED1B-AS1	3.30549e-82	1.21275	0.294	0.039	5.60148e-78	12	PCED1B-AS1
IL2RG	1.01627e-59	1.1625	0.421	0.102	1.72217e-55	12	IL2RG
CD99	1.02189e-45	1.10734	0.353	0.091	1.73169e-41	12	CD99
ID2	1.37623e-37	1.03511	0.353	0.104	2.33215e-33	12	ID2
HLA-F	5.45267e-26	0.99699	0.29	0.095	9.2401e-22	12	HLA-F
S100A10	1.23184e-48	0.97696	0.345	0.08	2.08747e-44	12	S100A10
TXNIP	8.82467e-25	0.80465	0.456	0.204	1.49543e-20	12	TXNIP
PSMB8	1.21229e-20	0.802364	0.298	0.113	2.05434e-16	12	PSMB8
HLA-A	2.759e-29	0.74823	0.782	0.527	4.6754e-25	12	HLA-A
PSMB9	4.36246e-21	0.735638	0.341	0.136	7.39263e-17	12	PSMB9
UCP2	8.13668e-12	0.707729	0.258	0.121	1.37884e-07	12	UCP2
CTSC	8.03767e-16	0.679663	0.282	0.116	1.36206e-11	12	CTSC
BTG1	1.78838e-14	0.6718	0.405	0.217	3.03059e-10	12	BTG1
PSME2	1.35954e-08	0.671538	0.317	0.19	0.000230387	12	PSME2
CD53	1.61034e-15	0.669165	0.321	0.143	2.72888e-11	12	CD53
LITAF	2.48822e-13	0.667553	0.333	0.165	4.21654e-09	12	LITAF
HCST	3.67401e-21	0.656106	0.571	0.306	6.22598e-17	12	HCST
HLA-E	3.51106e-17	0.634839	0.528	0.306	5.94984e-13	12	HLA-E
CALM1	8.79061e-13	0.625898	0.556	0.39	1.48966e-08	12	CALM1
RPS27	2.69037e-40	0.623423	0.992	0.903	4.5591e-36	12	RPS27
TMSB10	2.28975e-40	0.619023	0.968	0.724	3.88021e-36	12	TMSB10
SUB1	0.000130848	0.616513	0.365	0.29	1	12	SUB1
YWHAZ	1.92764e-12	0.612405	0.31	0.153	3.26658e-08	12	YWHAZ
B2M	1.18945e-62	0.611545	1	0.988	2.01564e-58	12	B2M
PSME1	1.21368e-12	0.60988	0.417	0.238	2.0567e-08	12	PSME1
SH3BGRL3	1.37497e-25	0.605606	0.786	0.533	2.33002e-21	12	SH3BGRL3
EMP3	6.20266e-15	0.605024	0.317	0.142	1.0511e-10	12	EMP3
HSPA8	1.971e-12	0.591337	0.397	0.221	3.34005e-08	12	HSPA8
CORO1A	1.25013e-16	0.582802	0.504	0.274	2.11847e-12	12	CORO1A
RPS4Y1	2.59066e-10	0.577935	0.274	0.138	4.39013e-06	12	RPS4Y1
PPP1CA	3.28816e-11	0.565184	0.302	0.153	5.57211e-07	12	PPP1CA
HLA-C	2.35473e-19	0.532623	0.758	0.572	3.99033e-15	12	HLA-C
ARPC2	6.29989e-13	0.526154	0.639	0.448	1.06758e-08	12	ARPC2
HLA-B	1.64663e-23	0.514146	0.889	0.714	2.79037e-19	12	HLA-B
MYL12B	1.09074e-11	0.483621	0.56	0.383	1.84837e-07	12	MYL12B
HNRNPC	4.10063e-07	0.460125	0.345	0.223	0.00694894	12	HNRNPC
SRSF5	7.43315e-06	0.458013	0.262	0.161	0.125962	12	SRSF5
LSP1	1.87287e-08	0.455761	0.317	0.178	0.000317377	12	LSP1
RPL3	2.1194e-14	0.445693	0.829	0.648	3.59153e-10	12	RPL3
RPL13A	1.56857e-15	0.438741	0.849	0.687	2.6581e-11	12	RPL13A
HNRNPK	5.04818e-07	0.436147	0.413	0.281	0.00855464	12	HNRNPK
CFL1	2.16624e-13	0.435262	0.798	0.692	3.67092e-09	12	CFL1
RPL23A	4.37984e-12	0.433661	0.71	0.54	7.42208e-08	12	RPL23A
CAPZB	1.28992e-07	0.433417	0.333	0.202	0.00218589	12	CAPZB
RPS15A	1.80209e-14	0.432435	0.845	0.683	3.05382e-10	12	RPS15A
TMSB4X	1.58045e-25	0.43143	1	0.967	2.67823e-21	12	TMSB4X
MT2A	5.54563e-08	0.430415	0.31	0.176	0.000939763	12	MT2A
DBI	2.76326e-06	0.418783	0.298	0.186	0.0468262	12	DBI
MTATP6P1	1.98295e-10	0.418091	0.52	0.329	3.36031e-06	12	MTATP6P1
RPS16	2.01627e-17	0.410321	0.841	0.619	3.41677e-13	12	RPS16
MYL12A	2.45526e-10	0.406322	0.659	0.503	4.16069e-06	12	MYL12A
EEF1D	7.55475e-07	0.404324	0.409	0.283	0.0128023	12	EEF1D
POMP	0.00137752	0.400754	0.29	0.218	1	12	POMP
SON	0.000202095	0.393964	0.345	0.256	1	12	SON
RPS29	2.57574e-16	0.392107	0.937	0.811	4.36485e-12	12	RPS29
PFN1	3.57482e-09	0.384988	0.762	0.67	6.0579e-05	12	PFN1
RPL10	6.52312e-16	0.382641	0.901	0.733	1.10541e-11	12	RPL10
UBE2D3	1.09752e-05	0.375073	0.27	0.167	0.185986	12	UBE2D3
S100A4	7.05883e-14	0.36153	0.738	0.497	1.19619e-09	12	S100A4
RAN	0.00012401	0.353818	0.417	0.308	1	12	RAN
RAC2	0.00011312	0.34155	0.377	0.273	1	12	RAC2
CALM3	0.00162131	0.337704	0.254	0.179	1	12	CALM3
SRSF3	0.000844946	0.330725	0.29	0.209	1	12	SRSF3
ANAPC16	9.37331e-05	0.326661	0.282	0.184	1	12	ANAPC16
RPS27A	2.64744e-13	0.326204	0.925	0.783	4.48636e-09	12	RPS27A
LSM3	0.001083	0.324657	0.286	0.205	1	12	LSM3
RPL28	1.39252e-09	0.311058	0.802	0.686	2.35977e-05	12	RPL28
LDHB	0.00045853	0.310539	0.349	0.256	1	12	LDHB
RPL21	3.34007e-10	0.310415	0.937	0.843	5.66008e-06	12	RPL21
EEF1A1	3.00123e-10	0.308248	0.925	0.809	5.08588e-06	12	EEF1A1
H3F3B	4.60877e-06	0.307649	0.544	0.429	0.0781001	12	H3F3B
IFITM2	4.97488e-11	0.306429	0.647	0.453	8.43044e-07	12	IFITM2
PCBP1	0.000383611	0.305497	0.361	0.27	1	12	PCBP1
MT-ND5	8.68838e-06	0.29908	0.484	0.345	0.147233	12	MT-ND5
CD37	0.00331963	0.299066	0.258	0.19	1	12	CD37
ACTG1	3.65995e-07	0.298337	0.762	0.658	0.00620216	12	ACTG1
PSMA7	0.00480016	0.296524	0.405	0.352	1	12	PSMA7
LCP1	8.18195e-05	0.293639	0.456	0.34	1	12	LCP1
C4orf3	0.00310435	0.289091	0.282	0.208	1	12	C4orf3
CAP1	0.00127252	0.279872	0.369	0.279	1	12	CAP1
CLIC1	0.00286604	0.277937	0.361	0.277	1	12	CLIC1
RPL6	1.28375e-06	0.276437	0.687	0.532	0.0217545	12	RPL6
RPL13AP5	4.36052e-05	0.272764	0.313	0.208	0.738934	12	RPL13AP5
RPL3P4	0.00191841	0.269388	0.321	0.244	1	12	RPL3P4
EIF3K	0.00235314	0.26651	0.282	0.206	1	12	EIF3K
PPIA	2.23696e-06	0.261828	0.611	0.475	0.0379076	12	PPIA
SRP14	0.000715072	0.260908	0.492	0.4	1	12	SRP14
RPS28	1.81594e-06	0.259127	0.73	0.576	0.0307729	12	RPS28
TOMM7	0.00376965	0.256052	0.353	0.282	1	12	TOMM7
RPL36AL	0.00026261	0.255854	0.556	0.449	1	12	RPL36AL
RPL30	1.86005e-07	0.255775	0.837	0.743	0.00315205	12	RPL30
FAU	5.56891e-06	0.255004	0.698	0.6	0.0943708	12	FAU
RPL24	4.69994e-05	0.252463	0.643	0.521	0.796451	12	RPL24
UBE2C	7.56072e-69	1.35396	0.402	0.076	1.28124e-64	13	UBE2C		Proliferating cell
PTTG1	2.58372e-57	1.25211	0.477	0.12	4.37837e-53	13	PTTG1
FOLR3	2.35346e-38	1.20467	0.453	0.147	3.98818e-34	13	FOLR3
TOP2A	3.09488e-51	1.16636	0.322	0.064	5.24458e-47	13	TOP2A
CAMP	9.42728e-46	1.12865	0.949	0.621	1.59755e-41	13	CAMP
TCN1	8.85124e-46	1.07561	0.472	0.133	1.49993e-41	13	TCN1
TMSB4XP4	1.51832e-29	1.05909	0.706	0.353	2.57295e-25	13	TMSB4XP4
OLFM4	3.65744e-18	1.04826	0.304	0.115	6.19789e-14	13	OLFM4
CHI3L1	3.9142e-50	1.01242	0.425	0.102	6.63301e-46	13	CHI3L1
KPNA2	3.06391e-38	1.00754	0.28	0.062	5.1921e-34	13	KPNA2
RETN	2.96429e-41	0.998313	0.776	0.43	5.02329e-37	13	RETN
LTF	3.44267e-54	0.985629	0.916	0.501	5.83394e-50	13	LTF
CKS1B	2.03329e-36	0.985234	0.346	0.092	3.44561e-32	13	CKS1B
HMGN2	1.94716e-28	0.948513	0.537	0.248	3.29966e-24	13	HMGN2
TUBA1C	2.00385e-29	0.92588	0.318	0.093	3.39573e-25	13	TUBA1C
H2AFV	5.68141e-30	0.923449	0.556	0.246	9.62772e-26	13	H2AFV
NSUN5	7.68267e-31	0.921619	0.313	0.086	1.30191e-26	13	NSUN5
CCNB1	1.33504e-32	0.907971	0.252	0.058	2.26236e-28	13	CCNB1
NUSAP1	5.90021e-27	0.902176	0.257	0.068	9.9985e-23	13	NUSAP1
S100A8	2.05137e-65	0.893692	1	0.936	3.47625e-61	13	S100A8
LCN2	1.11008e-44	0.890776	0.869	0.489	1.88113e-40	13	LCN2
CEACAM8	6.69815e-35	0.882565	0.607	0.247	1.13507e-30	13	CEACAM8
MMP8	1.52277e-43	0.840007	0.715	0.282	2.58049e-39	13	MMP8
HMGB2	4.83607e-35	0.834096	0.752	0.421	8.1952e-31	13	HMGB2
TUBB	4.41864e-22	0.804843	0.519	0.256	7.48782e-18	13	TUBB
ANXA1	6.15579e-36	0.80466	0.822	0.466	1.04316e-31	13	ANXA1
MNDA	7.73096e-37	0.79415	0.804	0.422	1.31009e-32	13	MNDA
CD59	3.30255e-16	0.793393	0.364	0.163	5.59651e-12	13	CD59
SLPI	2.39211e-32	0.792401	0.626	0.262	4.05367e-28	13	SLPI
HN1	1.41515e-18	0.7922	0.299	0.11	2.39812e-14	13	HN1
ARG1	2.84481e-20	0.78677	0.336	0.123	4.82082e-16	13	ARG1
STOM	1.71648e-20	0.770367	0.449	0.198	2.90875e-16	13	STOM
TMSB4X	6.14766e-68	0.75715	1	0.967	1.04178e-63	13	TMSB4X
ANXA3	1.91123e-27	0.753753	0.621	0.286	3.23878e-23	13	ANXA3
HP1BP3	3.27881e-20	0.740659	0.262	0.083	5.55628e-16	13	HP1BP3
CKS2	3.39811e-15	0.716225	0.318	0.136	5.75844e-11	13	CKS2
TUBB4B	3.7195e-15	0.709985	0.28	0.11	6.30307e-11	13	TUBB4B
MS4A3	1.28177e-26	0.69707	0.636	0.297	2.17209e-22	13	MS4A3
DEFA3	5.1009e-36	0.694916	0.981	0.824	8.64398e-32	13	DEFA3
CD63	7.72118e-22	0.674852	0.687	0.42	1.30843e-17	13	CD63
CYBB	6.73114e-15	0.637782	0.346	0.151	1.14066e-10	13	CYBB
FCN1	4.91917e-31	0.626601	0.799	0.426	8.33602e-27	13	FCN1
ITGAM	9.17042e-19	0.615373	0.332	0.121	1.55402e-14	13	ITGAM
ACTR2	4.97064e-10	0.606394	0.35	0.184	8.42324e-06	13	ACTR2
RGL4	2.10095e-13	0.60263	0.453	0.234	3.56027e-09	13	RGL4
TKT	9.38603e-13	0.598674	0.486	0.288	1.59056e-08	13	TKT
MCEMP1	8.52951e-16	0.598294	0.318	0.126	1.44541e-11	13	MCEMP1
BPI	9.41904e-25	0.596773	0.738	0.405	1.59615e-20	13	BPI
COX7A2L	2.38779e-10	0.587158	0.313	0.157	4.04635e-06	13	COX7A2L
COL17A1	2.23067e-13	0.576919	0.276	0.112	3.78009e-09	13	COL17A1
CALM2	4.34229e-17	0.575716	0.687	0.428	7.35844e-13	13	CALM2
BASP1	1.45452e-12	0.540321	0.29	0.123	2.46483e-08	13	BASP1
FAM101B	2.02393e-10	0.536699	0.285	0.133	3.42976e-06	13	FAM101B
GSN	4.90651e-14	0.532298	0.416	0.195	8.31458e-10	13	GSN
ANP32B	2.60399e-08	0.531711	0.36	0.212	0.000441272	13	ANP32B
PGLYRP1	3.33215e-24	0.527846	0.729	0.397	5.64666e-20	13	PGLYRP1
TUBA1B	2.07853e-16	0.52395	0.664	0.391	3.52227e-12	13	TUBA1B
CPNE3	4.3866e-11	0.512889	0.285	0.129	7.43352e-07	13	CPNE3
CYSTM1	3.46477e-14	0.508624	0.435	0.21	5.87139e-10	13	CYSTM1
CD24	1.17925e-13	0.505214	0.579	0.337	1.99835e-09	13	CD24
IRF2BP2	2.00834e-09	0.502313	0.271	0.128	3.40333e-05	13	IRF2BP2
VIM	1.87138e-15	0.499191	0.72	0.459	3.17124e-11	13	VIM
CAPG	2.81011e-10	0.498823	0.313	0.152	4.762e-06	13	CAPG
ALOX5AP	2.27888e-18	0.495762	0.766	0.485	3.8618e-14	13	ALOX5AP
CDA	1.39757e-12	0.485293	0.416	0.203	2.36832e-08	13	CDA
GYG1	4.97498e-08	0.479687	0.257	0.128	0.000843061	13	GYG1
PRDX5	1.03512e-07	0.474248	0.435	0.278	0.00175411	13	PRDX5
RAB31	4.28492e-11	0.473672	0.355	0.173	7.26122e-07	13	RAB31
EMB	3.42226e-09	0.469752	0.435	0.251	5.79936e-05	13	EMB
MSRB1	4.45128e-11	0.469288	0.439	0.24	7.54314e-07	13	MSRB1
ENY2	9.99006e-07	0.467945	0.29	0.169	0.0169292	13	ENY2
CEACAM6	4.98552e-10	0.451353	0.364	0.187	8.44847e-06	13	CEACAM6
FYB	1.46322e-07	0.450428	0.262	0.136	0.00247957	13	FYB
BLOC1S1	3.03826e-07	0.448337	0.383	0.235	0.00514863	13	BLOC1S1
LST1	5.2771e-09	0.446775	0.533	0.336	8.94257e-05	13	LST1
S100A9	5.19032e-26	0.437233	1	0.952	8.79551e-22	13	S100A9
ACTR3	6.87416e-07	0.432703	0.308	0.177	0.011649	13	ACTR3
APMAP	8.88644e-09	0.429418	0.364	0.199	0.00015059	13	APMAP
CALM3	3.00916e-05	0.421931	0.285	0.178	0.509932	13	CALM3
GNAI2	2.6135e-06	0.421174	0.294	0.17	0.0442883	13	GNAI2
CALM1	1.8777e-07	0.419107	0.551	0.391	0.00318195	13	CALM1
[truncated: 325 more rows]

## Sheet: P-extra2-Remission
Supplementary Table 9-2: Marker genes of P-extra 2 in UMAP pre and post regimen
	p_val	avg_logFC	pct.1	pct.2	p_val_adj	cluster	gene		cell type
DEFA3	0	2.16269	0.991	0.623	0	1	DEFA3		Neutrophil A
DEFA4	0	1.73533	0.966	0.37	0	1	DEFA4
BPI	1.4553e-290	1.5182	0.721	0.185	2.35118e-286	1	BPI
SLPI	1.71244e-259	1.48145	0.707	0.204	2.76662e-255	1	SLPI
SRGN	0	1.36801	0.994	0.667	0	1	SRGN
CEACAM6	1.83305e-161	1.35307	0.377	0.074	2.96148e-157	1	CEACAM6
MS4A3	2.25635e-238	1.27101	0.748	0.244	3.64537e-234	1	MS4A3
CD24	1.00741e-140	1.20652	0.429	0.112	1.62758e-136	1	CD24
RNASE2	4.5267e-242	1.17637	0.811	0.286	7.31334e-238	1	RNASE2
RNASE3	6.13401e-146	1.14914	0.515	0.157	9.91011e-142	1	RNASE3
AZU1	1.79691e-240	1.04608	0.913	0.414	2.90309e-236	1	AZU1
S100P	3.44326e-136	1.02718	0.569	0.199	5.56293e-132	1	S100P
MPO	8.19298e-203	1.00106	0.874	0.414	1.32366e-198	1	MPO
CEACAM8	6.61303e-67	0.898966	0.327	0.115	1.0684e-62	1	CEACAM8
SERPINB1	1.07769e-97	0.897223	0.562	0.249	1.74111e-93	1	SERPINB1
ELANE	3.34492e-225	0.896484	0.959	0.567	5.40404e-221	1	ELANE
RGL4	1.96378e-76	0.89372	0.358	0.124	3.17268e-72	1	RGL4
NUCB2	1.02246e-124	0.878485	0.686	0.313	1.65188e-120	1	NUCB2
PRTN3	3.00302e-191	0.815533	0.856	0.379	4.85168e-187	1	PRTN3
ANXA3	3.71654e-52	0.764142	0.347	0.146	6.00444e-48	1	ANXA3
CD59	3.75394e-38	0.727862	0.303	0.143	6.06486e-34	1	CD59
MIR223	8.45191e-39	0.695155	0.259	0.106	1.36549e-34	1	MIR223
EMB	1.7478e-34	0.680103	0.297	0.142	2.82375e-30	1	EMB
PLAC8	9.85361e-73	0.670323	0.649	0.359	1.59195e-68	1	PLAC8
CTSG	4.96899e-170	0.662961	0.784	0.311	8.0279e-166	1	CTSG
TKT	6.21396e-30	0.622398	0.267	0.129	1.00393e-25	1	TKT
TMSB4XP4	1.61813e-75	0.614745	0.66	0.36	2.61426e-71	1	TMSB4XP4
MALAT1	5.1431e-37	0.611661	0.482	0.292	8.30919e-33	1	MALAT1
CSTA	1.40747e-39	0.594079	0.428	0.234	2.27391e-35	1	CSTA
H2AFY	3.77358e-21	0.564117	0.253	0.139	6.09659e-17	1	H2AFY
LYZ	1.60772e-124	0.543261	0.893	0.492	2.59744e-120	1	LYZ
PSMB7	2.28059e-17	0.489858	0.286	0.178	3.68452e-13	1	PSMB7
P4HB	8.65662e-18	0.482313	0.307	0.193	1.39856e-13	1	P4HB
AIF1	3.48293e-38	0.480791	0.49	0.278	5.62702e-34	1	AIF1
CD63	3.87453e-26	0.475784	0.513	0.357	6.2597e-22	1	CD63
MNDA	6.61345e-46	0.4708	0.516	0.277	1.06847e-41	1	MNDA
GMFG	3.24539e-42	0.462122	0.715	0.517	5.24325e-38	1	GMFG
PRDX5	2.87008e-14	0.455718	0.321	0.218	4.6369e-10	1	PRDX5
H2AFV	4.25771e-16	0.452906	0.317	0.211	6.87875e-12	1	H2AFV
GLRX	1.14957e-16	0.446166	0.308	0.196	1.85724e-12	1	GLRX
FOLR3	3.74228e-30	0.431679	0.315	0.155	6.04602e-26	1	FOLR3
ALOX5AP	9.42494e-27	0.412257	0.49	0.312	1.52269e-22	1	ALOX5AP
GCA	5.57615e-19	0.371547	0.35	0.215	9.00882e-15	1	GCA
GSTP1	2.69839e-16	0.369389	0.477	0.357	4.35951e-12	1	GSTP1
CAT	7.32105e-11	0.358638	0.268	0.182	1.18279e-06	1	CAT
TALDO1	1.00346e-09	0.357313	0.309	0.225	1.62119e-05	1	TALDO1
CST7	3.33478e-30	0.34183	0.635	0.438	5.38767e-26	1	CST7
TXN	2.0788e-21	0.338989	0.621	0.466	3.35851e-17	1	TXN
RETN	1.09704e-23	0.337978	0.344	0.194	1.77238e-19	1	RETN
HMGN1	1.82908e-07	0.323853	0.295	0.228	0.00295506	1	HMGN1
SERF2	4.30877e-28	0.32152	0.857	0.766	6.96124e-24	1	SERF2
TMBIM6	1.85795e-14	0.314164	0.484	0.37	3.0017e-10	1	TMBIM6
TMSB4X	4.06156e-55	0.311256	0.989	0.933	6.56186e-51	1	TMSB4X
LSM5	3.91115e-07	0.307461	0.274	0.206	0.00631885	1	LSM5
HMGB2	4.98897e-13	0.302711	0.366	0.255	8.06018e-09	1	HMGB2
S100A8	5.72987e-121	0.28672	0.999	0.948	9.25719e-117	1	S100A8
STMN1	9.28808e-12	0.286358	0.349	0.245	1.50058e-07	1	STMN1
H2AFZ	2.19483e-18	0.278084	0.602	0.45	3.54597e-14	1	H2AFZ
LST1	2.60033e-15	0.276705	0.351	0.225	4.2011e-11	1	LST1
HSP90AA1	4.71815e-08	0.27602	0.299	0.224	0.000762265	1	HSP90AA1
NDUFB1	1.46843e-08	0.269048	0.393	0.314	0.00023724	1	NDUFB1
VAMP8	2.30827e-11	0.268242	0.398	0.291	3.72925e-07	1	VAMP8
CCL5	0	1.72154	0.859	0.224	0	2	CCL5		T cell_CCL5 high
GNLY	1.61205e-252	1.50189	0.677	0.17	2.60443e-248	2	GNLY
IL32	5.68193e-233	1.47327	0.536	0.105	9.17973e-229	2	IL32
TRBC2	7.9864e-210	1.38066	0.592	0.152	1.29028e-205	2	TRBC2
CD3D	1.32459e-169	1.34812	0.427	0.088	2.14001e-165	2	CD3D
GZMA	1.56874e-172	1.34785	0.482	0.114	2.53446e-168	2	GZMA
TRAC	5.7451e-180	1.34432	0.485	0.11	9.28178e-176	2	TRAC
CD52	1.71394e-255	1.32761	0.767	0.226	2.76904e-251	2	CD52
TRBC1	1.02842e-157	1.32426	0.424	0.093	1.66152e-153	2	TRBC1
IFITM1	4.31647e-168	1.30943	0.448	0.097	6.97369e-164	2	IFITM1
GZMH	8.09482e-137	1.27785	0.41	0.1	1.3078e-132	2	GZMH
TXNIP	1.33724e-149	1.25559	0.459	0.12	2.16045e-145	2	TXNIP
GIMAP7	1.52648e-118	1.20961	0.312	0.064	2.46617e-114	2	GIMAP7
CD2	1.24885e-130	1.18637	0.274	0.043	2.01765e-126	2	CD2
GZMB	1.78671e-124	1.08959	0.427	0.114	2.8866e-120	2	GZMB
LTB	2.84234e-95	1.04948	0.336	0.09	4.59208e-91	2	LTB
NKG7	5.09732e-138	1.03026	0.773	0.434	8.23522e-134	2	NKG7
S100A10	9.71089e-88	0.989788	0.362	0.111	1.56889e-83	2	S100A10
TRAF3IP3	6.44944e-68	0.976059	0.257	0.072	1.04197e-63	2	TRAF3IP3
CORO1A	3.19578e-77	0.95045	0.378	0.134	5.1631e-73	2	CORO1A
HLA-E	5.01902e-89	0.89997	0.55	0.246	8.10873e-85	2	HLA-E
HLA-B	1.00833e-145	0.873633	0.861	0.581	1.62905e-141	2	HLA-B
CD99	6.58676e-52	0.866275	0.288	0.107	1.06416e-47	2	CD99
HLA-C	1.05666e-113	0.859164	0.755	0.442	1.70714e-109	2	HLA-C
CD53	4.05734e-60	0.858683	0.325	0.121	6.55504e-56	2	CD53
IL2RG	3.81495e-59	0.844355	0.359	0.146	6.16343e-55	2	IL2RG
EEF1D	5.60416e-75	0.791892	0.556	0.277	9.05408e-71	2	EEF1D
S100A4	4.384e-103	0.77433	0.763	0.426	7.08279e-99	2	S100A4
DDX5	1.33942e-46	0.751297	0.431	0.23	2.16397e-42	2	DDX5
RPS27	2.83798e-223	0.725203	0.999	0.931	4.58503e-219	2	RPS27
HCST	7.97188e-56	0.721332	0.512	0.275	1.28794e-51	2	HCST
EMP3	3.87416e-40	0.717667	0.355	0.174	6.25909e-36	2	EMP3
TMSB10	4.15351e-168	0.716353	0.972	0.789	6.7104e-164	2	TMSB10
RPL10	1.71073e-156	0.696877	0.974	0.714	2.76385e-152	2	RPL10
HLA-A	8.85277e-66	0.681553	0.677	0.441	1.43025e-61	2	HLA-A
RPS28	1.99411e-85	0.654161	0.783	0.495	3.22168e-81	2	RPS28
LITAF	2.90428e-32	0.646466	0.27	0.123	4.69215e-28	2	LITAF
RPS29	1.86098e-148	0.644965	0.987	0.795	3.0066e-144	2	RPS29
RPL3	3.62269e-113	0.643786	0.921	0.675	5.85282e-109	2	RPL3
RPL13A	1.59737e-122	0.64227	0.932	0.673	2.58071e-118	2	RPL13A
HSPA8	1.38518e-30	0.634053	0.335	0.182	2.2379e-26	2	HSPA8
SH3BGRL3	2.8557e-83	0.633712	0.802	0.539	4.61367e-79	2	SH3BGRL3
RPS15A	1.41305e-108	0.615178	0.908	0.634	2.28292e-104	2	RPS15A
PCBP1	3.63335e-22	0.602965	0.335	0.209	5.87004e-18	2	PCBP1
RPL13	1.58621e-128	0.594044	0.97	0.744	2.56269e-124	2	RPL13
RPL6	8.51365e-65	0.591297	0.742	0.509	1.37547e-60	2	RPL6
RPS12	5.63782e-107	0.5863	0.931	0.719	9.10846e-103	2	RPS12
RPLP2	4.15095e-112	0.575566	0.945	0.753	6.70627e-108	2	RPLP2
RPL21	1.4164e-141	0.570675	0.993	0.861	2.28833e-137	2	RPL21
RPL30	1.33779e-87	0.55427	0.903	0.711	2.16134e-83	2	RPL30
ITGB2	3.44507e-24	0.55323	0.312	0.173	5.56585e-20	2	ITGB2
RPL11	1.37011e-81	0.544218	0.888	0.701	2.21356e-77	2	RPL11
RPL10A	9.58292e-50	0.540356	0.662	0.446	1.54822e-45	2	RPL10A
RPS16	7.07532e-73	0.539708	0.855	0.611	1.14309e-68	2	RPS16
TAGLN2	2.69364e-19	0.5316	0.252	0.141	4.35184e-15	2	TAGLN2
RPL23A	1.28138e-54	0.530441	0.727	0.516	2.07019e-50	2	RPL23A
RPS15	2.60929e-96	0.523454	0.932	0.709	4.21556e-92	2	RPS15
MT-ND5	1.93274e-29	0.519764	0.51	0.356	3.12253e-25	2	MT-ND5
CALM1	3.75099e-33	0.518064	0.569	0.399	6.06011e-29	2	CALM1
EEF1A1	1.14586e-70	0.511827	0.897	0.774	1.85126e-66	2	EEF1A1
RPS27A	7.25816e-100	0.505452	0.963	0.805	1.17263e-95	2	RPS27A
UBA52	1.63906e-48	0.5039	0.749	0.571	2.64806e-44	2	UBA52
RPSA	6.67018e-32	0.502389	0.543	0.37	1.07763e-27	2	RPSA
RPS2	4.98323e-70	0.502188	0.85	0.596	8.0509e-66	2	RPS2
PSME1	4.51042e-15	0.496975	0.321	0.219	7.28704e-11	2	PSME1
PSMB9	2.6302e-18	0.496717	0.288	0.173	4.24935e-14	2	PSMB9
RPL19	4.18285e-73	0.493686	0.897	0.69	6.75782e-69	2	RPL19
CFL1	1.37107e-46	0.49216	0.736	0.563	2.2151e-42	2	CFL1
RPL18	4.462e-54	0.490796	0.749	0.523	7.20881e-50	2	RPL18
RPL28	1.27557e-62	0.49045	0.826	0.628	2.06081e-58	2	RPL28
RPS25	2.12747e-61	0.47732	0.861	0.662	3.43714e-57	2	RPS25
FAU	2.10378e-43	0.474782	0.734	0.563	3.39886e-39	2	FAU
RPL14	6.71383e-40	0.463871	0.656	0.456	1.08469e-35	2	RPL14
IFITM2	7.16474e-52	0.460916	0.659	0.415	1.15753e-47	2	IFITM2
RPL22	2.71575e-26	0.457612	0.49	0.327	4.38756e-22	2	RPL22
RPS3	2.59602e-77	0.453044	0.945	0.764	4.19413e-73	2	RPS3
ACTG1	7.02859e-34	0.448825	0.668	0.504	1.13554e-29	2	ACTG1
SLC25A6	1.0687e-12	0.437843	0.294	0.201	1.72659e-08	2	SLC25A6
RPS3A	3.17267e-83	0.433891	0.963	0.764	5.12577e-79	2	RPS3A
RPS7	2.08502e-29	0.430783	0.616	0.441	3.36856e-25	2	RPS7
UBC	9.37511e-17	0.430263	0.406	0.289	1.51464e-12	2	UBC
RPL27A	2.69557e-76	0.426888	0.961	0.824	4.35497e-72	2	RPL27A
TOMM7	4.71272e-12	0.416406	0.331	0.24	7.61386e-08	2	TOMM7
ANAPC16	1.93532e-13	0.414018	0.265	0.17	3.1267e-09	2	ANAPC16
CLIC1	6.66728e-12	0.411933	0.298	0.206	1.07717e-07	2	CLIC1
ACTB	2.79764e-42	0.403156	0.839	0.681	4.51986e-38	2	ACTB
MIF	2.31948e-15	0.401753	0.273	0.165	3.74735e-11	2	MIF
RPL8	3.2611e-37	0.397667	0.763	0.609	5.26863e-33	2	RPL8
RPL35A	2.95594e-49	0.394854	0.884	0.726	4.77562e-45	2	RPL35A
RPL38	3.86951e-26	0.39225	0.645	0.492	6.25158e-22	2	RPL38
MTATP6P1	5.26116e-22	0.39148	0.412	0.253	8.49992e-18	2	MTATP6P1
RPL41	6.90221e-49	0.390847	0.803	0.56	1.11512e-44	2	RPL41
RPL18A	2.12147e-46	0.388295	0.823	0.634	3.42745e-42	2	RPL18A
RAC2	3.73474e-11	0.3876	0.28	0.19	6.03385e-07	2	RAC2
ITM2B	2.06696e-11	0.384978	0.303	0.211	3.33938e-07	2	ITM2B
RPL36	7.97445e-49	0.384852	0.88	0.712	1.28835e-44	2	RPL36
MYL12B	5.89089e-12	0.384182	0.402	0.311	9.51733e-08	2	MYL12B
RPS9	1.56666e-29	0.37791	0.675	0.512	2.53109e-25	2	RPS9
CD74	2.57665e-23	0.371364	0.462	0.303	4.16283e-19	2	CD74
RP11-543P15.1	1.68076e-24	0.354508	0.545	0.374	2.71544e-20	2	RP11-543P15.1
RPL24	2.23781e-21	0.348277	0.624	0.481	3.6154e-17	2	RPL24
RPL9P9	5.61726e-16	0.344876	0.477	0.35	9.07525e-12	2	RPL9P9
LDHB	1.49185e-10	0.344867	0.353	0.262	2.41023e-06	2	LDHB
SNHG5	6.44292e-10	0.343367	0.283	0.199	1.04092e-05	2	SNHG5
RPL34	7.40246e-62	0.342744	0.985	0.921	1.19594e-57	2	RPL34
RP4-765C7.2	1.32146e-21	0.341089	0.378	0.22	2.13496e-17	2	RP4-765C7.2
EDF1	5.51005e-08	0.341022	0.27	0.2	0.000890204	2	EDF1
RPS11	2.14787e-33	0.339251	0.825	0.688	3.4701e-29	2	RPS11
MYL12A	1.68258e-16	0.333392	0.551	0.432	2.71838e-12	2	MYL12A
MT-CO1	8.89779e-74	0.327504	0.994	0.961	1.43753e-69	2	MT-CO1
RPS4X	1.36391e-30	0.325226	0.844	0.697	2.20353e-26	2	RPS4X
EIF1	1.79805e-16	0.322633	0.614	0.51	2.90492e-12	2	EIF1
RPL32	2.96122e-46	0.32263	0.926	0.81	4.78414e-42	2	RPL32
PPIA	7.72056e-14	0.3196	0.507	0.398	1.24733e-09	2	PPIA
RPL5	6.42151e-27	0.317593	0.76	0.607	1.03746e-22	2	RPL5
RPS20	1.46354e-29	0.314563	0.839	0.708	2.3645e-25	2	RPS20
B2M	1.3875e-76	0.308929	0.997	0.989	2.24165e-72	2	B2M
EEF2	2.73633e-06	0.306216	0.272	0.215	0.0442082	2	EEF2
PFDN5	2.71757e-15	0.304006	0.613	0.508	4.39051e-11	2	PFDN5
RACK1	3.61272e-16	0.299233	0.612	0.506	5.83671e-12	2	RACK1
RPL4	6.88056e-14	0.298203	0.548	0.438	1.11162e-09	2	RPL4
RPL9	1.98538e-21	0.295141	0.74	0.637	3.20758e-17	2	RPL9
RPS5	1.0662e-14	0.293897	0.547	0.433	1.72255e-10	2	RPS5
RPL3P4	1.91705e-06	0.289123	0.318	0.26	0.0309719	2	RPL3P4
SNHG6	1.02608e-06	0.284717	0.283	0.219	0.0165774	2	SNHG6
RPL12	4.75725e-19	0.284642	0.657	0.519	7.68582e-15	2	RPL12
RPL7A	2.99128e-16	0.280024	0.653	0.545	4.83271e-12	2	RPL7A
COX7C	1.09769e-10	0.279977	0.529	0.454	1.77342e-06	2	COX7C
RPL23	4.03857e-18	0.279845	0.644	0.515	6.52472e-14	2	RPL23
RPL37A	1.60133e-29	0.279486	0.798	0.637	2.58711e-25	2	RPL37A
RPL13AP5	5.30584e-13	0.27457	0.316	0.205	8.57212e-09	2	RPL13AP5
RHOA	0.000140936	0.271874	0.287	0.243	1	2	RHOA
RPS6	2.65859e-37	0.270603	0.97	0.871	4.29522e-33	2	RPS6
MT-CYB	5.76761e-24	0.264078	0.885	0.836	9.31815e-20	2	MT-CYB
RPS18	5.26782e-33	0.257585	0.895	0.739	8.51069e-29	2	RPS18
MT-ND2	1.67716e-11	0.254479	0.669	0.583	2.70962e-07	2	MT-ND2
RPL31	1.0215e-35	0.252997	0.949	0.839	1.65033e-31	2	RPL31
RPL29	1.656e-13	0.252424	0.526	0.42	2.67543e-09	2	RPL29
CTSG1	0	2.46957	0.963	0.302	0	3	CTSG		Neutrophil B
PRTN31	0	2.20143	0.953	0.381	0	3	PRTN3
ELANE1	0	1.95892	0.997	0.574	0	3	ELANE
AZU11	0	1.77537	0.987	0.42	0	3	AZU1
MPO1	0	1.70866	0.96	0.418	0	3	MPO
CST71	0	1.69688	0.961	0.401	0	3	CST7
NUCB21	3.63088e-292	1.52242	0.878	0.3	5.86604e-288	3	NUCB2
SRGN1	3.22415e-287	1.39209	0.992	0.677	5.20893e-283	3	SRGN
PRSS57	2.40664e-189	1.32535	0.4	0.059	3.88817e-185	3	PRSS57
DEFA41	2.9035e-138	1.30965	0.789	0.412	4.6909e-134	3	DEFA4
RNASE31	5.53351e-198	1.25344	0.629	0.153	8.93994e-194	3	RNASE3
HSPA5	1.65215e-164	1.23651	0.564	0.147	2.66922e-160	3	HSPA5
P4HB1	1.48905e-152	1.14695	0.581	0.161	2.40571e-148	3	P4HB
RNASE21	6.66827e-206	1.14566	0.848	0.298	1.07733e-201	3	RNASE2
CALR	2.33269e-127	1.13927	0.388	0.085	3.76869e-123	3	CALR
PLAC81	2.2821e-198	1.12058	0.862	0.34	3.68696e-194	3	PLAC8
SERPINB11	7.2788e-169	1.08662	0.723	0.238	1.17596e-164	3	SERPINB1
MS4A31	9.05724e-167	1.00929	0.767	0.257	1.46329e-162	3	MS4A3
IGFBP7	9.92846e-89	0.966894	0.303	0.069	1.60404e-84	3	IGFBP7
CAT1	2.33059e-98	0.93263	0.487	0.156	3.76531e-94	3	CAT
HSP90B1	2.28301e-106	0.923362	0.559	0.194	3.68843e-102	3	HSP90B1
PDIA6	7.34321e-86	0.915532	0.43	0.138	1.18637e-81	3	PDIA6
MGST1	1.18396e-97	0.899335	0.416	0.115	1.91281e-93	3	MGST1
TNFSF13B	6.49915e-84	0.871116	0.29	0.066	1.05e-79	3	TNFSF13B
CNIH4	2.19849e-69	0.86083	0.339	0.103	3.55189e-65	3	CNIH4
PPIB	5.80615e-79	0.85402	0.423	0.141	9.38041e-75	3	PPIB
ABRACL	1.00442e-70	0.836705	0.403	0.138	1.62275e-66	3	ABRACL
IFI6	2.17406e-65	0.806584	0.392	0.138	3.51242e-61	3	IFI6
CEACAM61	5.27277e-60	0.773393	0.305	0.093	8.51869e-56	3	CEACAM6
VAMP81	6.19245e-77	0.750792	0.61	0.267	1.00045e-72	3	VAMP8
GSTP11	1.87413e-77	0.724311	0.69	0.332	3.02784e-73	3	GSTP1
CSTA1	1.20655e-76	0.722247	0.561	0.222	1.94931e-72	3	CSTA
RPS26	5.56891e-98	0.708992	0.875	0.545	8.99714e-94	3	RPS26
SLPI1	3.45748e-76	0.706263	0.577	0.237	5.58591e-72	3	SLPI
NDUFB9	5.16007e-61	0.70018	0.573	0.265	8.33662e-57	3	NDUFB9
SERF21	1.07826e-127	0.686759	0.969	0.754	1.74203e-123	3	SERF2
PSMB71	3.71438e-48	0.643415	0.402	0.167	6.00096e-44	3	PSMB7
GSTO1	3.47946e-46	0.638452	0.391	0.161	5.62141e-42	3	GSTO1
OSTC	5.1671e-35	0.637573	0.278	0.113	8.34797e-31	3	OSTC
TMEM258	3.43769e-55	0.619148	0.669	0.359	5.55393e-51	3	TMEM258
RP11-620J15.3	4.45141e-40	0.611272	0.253	0.089	7.19169e-36	3	RP11-620J15.3
SEC61G	5.21941e-36	0.58647	0.395	0.186	8.43248e-32	3	SEC61G
PABPC1	2.80303e-56	0.586058	0.714	0.402	4.52857e-52	3	PABPC1
PTMA	8.86792e-74	0.579983	0.884	0.635	1.4327e-69	3	PTMA
SHFM1	4.0727e-39	0.575473	0.477	0.241	6.57986e-35	3	SHFM1
SYNGR1	1.1413e-37	0.566412	0.301	0.118	1.84389e-33	3	SYNGR1
NAP1L1	1.52581e-34	0.565702	0.339	0.15	2.46511e-30	3	NAP1L1
MTDH	5.37542e-27	0.55648	0.254	0.111	8.68453e-23	3	MTDH
LRRC75A-AS1	1.5756e-43	0.54952	0.557	0.281	2.54553e-39	3	LRRC75A-AS1
TXN1	2.70289e-56	0.545174	0.763	0.452	4.36679e-52	3	TXN
HMGN11	1.02749e-34	0.541567	0.43	0.212	1.66001e-30	3	HMGN1
LSM7	4.21883e-33	0.540636	0.302	0.128	6.81593e-29	3	LSM7
TMBIM61	5.68242e-42	0.539824	0.621	0.355	9.18052e-38	3	TMBIM6
SEC61B	2.02075e-41	0.537597	0.493	0.244	3.26473e-37	3	SEC61B
H2AFZ1	1.65317e-54	0.537284	0.739	0.436	2.67087e-50	3	H2AFZ
ENO1	5.75721e-42	0.532292	0.511	0.247	9.30135e-38	3	ENO1
NDUFB2	2.82452e-38	0.503365	0.527	0.272	4.56329e-34	3	NDUFB2
RPLP0	1.38726e-52	0.480793	0.854	0.616	2.24126e-48	3	RPLP0
HNRNPU	1.81742e-25	0.47143	0.258	0.114	2.93622e-21	3	HNRNPU
GNAS	7.18509e-30	0.47128	0.368	0.176	1.16082e-25	3	GNAS
LSM51	5.27134e-29	0.467416	0.386	0.194	8.51637e-25	3	LSM5
RNF181	5.91703e-21	0.466595	0.298	0.152	9.55956e-17	3	RNF181
CTSC	1.86323e-26	0.464405	0.266	0.116	3.01023e-22	3	CTSC
CTSD	1.51647e-25	0.464283	0.273	0.123	2.45001e-21	3	CTSD
HSBP1	3.30566e-21	0.446737	0.319	0.165	5.34063e-17	3	HSBP1
COX6B1	7.38194e-31	0.442287	0.588	0.351	1.19263e-26	3	COX6B1
H2AFY1	3.30595e-23	0.436591	0.289	0.138	5.34109e-19	3	H2AFY
MYDGF	5.4666e-24	0.426352	0.265	0.121	8.83184e-20	3	MYDGF
ATP5G1	1.53809e-22	0.420408	0.339	0.178	2.48494e-18	3	ATP5G1
FKBP2	4.11233e-24	0.418179	0.301	0.143	6.64388e-20	3	FKBP2
RGL41	3.3683e-28	0.413565	0.31	0.138	5.44182e-24	3	RGL4
TIMM8B	4.80161e-20	0.411429	0.295	0.151	7.75749e-16	3	TIMM8B
EIF2S2	1.19328e-21	0.410303	0.334	0.176	1.92787e-17	3	EIF2S2
UQCR10	1.87078e-26	0.410063	0.547	0.321	3.02244e-22	3	UQCR10
PRDX51	2.83869e-21	0.403603	0.388	0.213	4.58619e-17	3	PRDX5
MINOS1	9.90706e-19	0.402782	0.297	0.156	1.60059e-14	3	MINOS1
HSP90AA11	2.02051e-21	0.398076	0.39	0.215	3.26434e-17	3	HSP90AA1
GAPDH	1.7693e-29	0.386318	0.814	0.638	2.85847e-25	3	GAPDH
EEF1A11	5.01519e-53	0.382961	0.952	0.769	8.10254e-49	3	EEF1A1
GNG5	1.15398e-21	0.381546	0.488	0.297	1.86438e-17	3	GNG5
ATP5J	1.72147e-24	0.379817	0.58	0.36	2.78121e-20	3	ATP5J
TKT1	6.7254e-20	0.377797	0.271	0.133	1.08656e-15	3	TKT
RPS24	2.10736e-40	0.375765	0.886	0.655	3.40464e-36	3	RPS24
ZFP36L2	3.45573e-19	0.375294	0.277	0.138	5.58307e-15	3	ZFP36L2
ROMO1	2.16638e-18	0.373816	0.445	0.27	3.50001e-14	3	ROMO1
SNRPF	1.46189e-16	0.373118	0.266	0.14	2.36184e-12	3	SNRPF
NPC2	1.90495e-19	0.372697	0.355	0.191	3.07763e-15	3	NPC2
AIF11	6.48505e-32	0.361679	0.524	0.281	1.04773e-27	3	AIF1
SNRPD1	8.44341e-21	0.357342	0.379	0.208	1.36412e-16	3	SNRPD1
H2AFV1	5.10369e-20	0.355967	0.375	0.206	8.24552e-16	3	H2AFV
HSP90AB1	8.45082e-18	0.355944	0.269	0.138	1.36531e-13	3	HSP90AB1
ATP5H	6.54857e-17	0.354906	0.263	0.137	1.05799e-12	3	ATP5H
SLC25A5	1.89386e-16	0.34906	0.251	0.131	3.05973e-12	3	SLC25A5
HNRNPA2B1	2.14695e-18	0.348286	0.392	0.224	3.46861e-14	3	HNRNPA2B1
MRPL51	4.70854e-14	0.345885	0.368	0.231	7.60712e-10	3	MRPL51
STMN11	3.77147e-19	0.322239	0.418	0.24	6.09319e-15	3	STMN1
NDUFA13	6.56663e-16	0.317268	0.257	0.134	1.06091e-11	3	NDUFA13
PGK1	3.14774e-16	0.317209	0.359	0.207	5.08549e-12	3	PGK1
HMGB1	5.19718e-20	0.316441	0.501	0.303	8.39657e-16	3	HMGB1
LDHB1	8.49147e-19	0.314733	0.436	0.253	1.37188e-14	3	LDHB
MRPS18C	5.75715e-12	0.314546	0.258	0.151	9.30125e-08	3	MRPS18C
GYPC	4.87971e-15	0.310678	0.263	0.143	7.88365e-11	3	GYPC
NDUFC2	3.68054e-14	0.309233	0.314	0.185	5.94628e-10	3	NDUFC2
RPL7	1.46921e-45	0.308754	0.969	0.845	2.37366e-41	3	RPL7
NAA38	2.84394e-13	0.305928	0.31	0.184	4.59466e-09	3	NAA38
EEF1B2	6.57033e-23	0.302626	0.624	0.397	1.0615e-18	3	EEF1B2
ATP5A1	4.73574e-15	0.301937	0.342	0.2	7.65106e-11	3	ATP5A1
SLIRP	7.00435e-19	0.301866	0.436	0.254	1.13162e-14	3	SLIRP
COX6C	7.04847e-19	0.301551	0.523	0.321	1.13875e-14	3	COX6C
NDUFA4	3.38273e-16	0.300762	0.582	0.393	5.46514e-12	3	NDUFA4
UQCRQ	6.12002e-17	0.300704	0.553	0.353	9.8875e-13	3	UQCRQ
UQCR11	5.52621e-19	0.300218	0.569	0.366	8.92815e-15	3	UQCR11
FTL	5.40702e-59	0.300001	0.995	0.943	8.73559e-55	3	FTL
USMG5	8.40187e-15	0.299479	0.452	0.288	1.35741e-10	3	USMG5
PKM	4.9761e-15	0.295666	0.266	0.14	8.03939e-11	3	PKM
RAN	3.51275e-15	0.294651	0.424	0.259	5.67519e-11	3	RAN
CD631	2.88691e-19	0.294089	0.561	0.356	4.66409e-15	3	CD63
LSM3	2.25638e-11	0.288686	0.339	0.213	3.6454e-07	3	LSM3
NDUFB8	1.91334e-12	0.28767	0.322	0.195	3.0912e-08	3	NDUFB8
HNRNPA1	2.05267e-15	0.281041	0.476	0.3	3.31629e-11	3	HNRNPA1
COX8A	1.85836e-13	0.276295	0.346	0.207	3.00237e-09	3	COX8A
SSR4	1.33571e-21	0.27548	0.578	0.363	2.15797e-17	3	SSR4
VPS29	9.90198e-12	0.274425	0.31	0.19	1.59976e-07	3	VPS29
DBI	4.72302e-16	0.272749	0.355	0.2	7.6305e-12	3	DBI
PSMA4	1.30483e-12	0.27055	0.285	0.166	2.10808e-08	3	PSMA4
TPI1	9.30038e-15	0.269348	0.323	0.184	1.50257e-10	3	TPI1
SNRPG	5.60227e-16	0.268937	0.457	0.28	9.05103e-12	3	SNRPG
RPL7A1	1.68201e-16	0.268821	0.721	0.538	2.71746e-12	3	RPL7A
OAZ1	2.38153e-13	0.266516	0.674	0.515	3.8476e-09	3	OAZ1
NDUFA1	2.82985e-13	0.263805	0.468	0.304	4.57191e-09	3	NDUFA1
ATP5J2	1.16743e-14	0.262733	0.517	0.337	1.88609e-10	3	ATP5J2
RPLP1	4.54234e-32	0.262564	0.968	0.839	7.33861e-28	3	RPLP1
NDUFA3	1.93583e-12	0.262407	0.407	0.258	3.12753e-08	3	NDUFA3
ATP5I	1.18264e-12	0.251977	0.536	0.365	1.91068e-08	3	ATP5I
RP11-343H5.4	0	1.89161	0.726	0.141	0	4	RP11-343H5.4		AML progenitor cell
RPL7P1	5.49911e-305	1.86714	0.71	0.139	8.88437e-301	4	RPL7P1
MT-TW	1.97175e-262	1.84215	0.761	0.215	3.18556e-258	4	MT-TW
RPS3AP6	1.22963e-269	1.84198	0.713	0.17	1.98658e-265	4	RPS3AP6
RP11-422P24.9	3.90583e-247	1.83347	0.441	0.051	6.31026e-243	4	RP11-422P24.9
RP5-1056L3.3	1.75462e-255	1.83341	0.525	0.078	2.83476e-251	4	RP5-1056L3.3
RPS27AP16	1.7154e-259	1.82567	0.655	0.138	2.7714e-255	4	RPS27AP16
RP11-778D9.4	1.00392e-246	1.80491	0.445	0.053	1.62193e-242	4	RP11-778D9.4
RP11-112J1.1	1.32987e-272	1.79454	0.525	0.07	2.14854e-268	4	RP11-112J1.1
AC004453.8	3.33226e-257	1.78847	0.592	0.106	5.38361e-253	4	AC004453.8
RP11-92K2.2	3.34482e-238	1.7871	0.582	0.113	5.40388e-234	4	RP11-92K2.2
RPL13P12	3.18929e-282	1.78604	0.84	0.268	5.15261e-278	4	RPL13P12
RPS3AP26	8.14238e-249	1.77906	0.721	0.197	1.31548e-244	4	RPS3AP26
RPL15P3	1.29622e-251	1.77436	0.659	0.149	2.09417e-247	4	RPL15P3
RPS2P5	1.90608e-224	1.77275	0.569	0.114	3.07947e-220	4	RPS2P5
RP11-234A1.1	2.062e-258	1.76521	0.74	0.2	3.33137e-254	4	RP11-234A1.1
RPL10P16	3.90905e-244	1.75517	0.533	0.085	6.31546e-240	4	RPL10P16
RP11-69L16.5	4.30378e-198	1.75309	0.339	0.036	6.95318e-194	4	RP11-69L16.5
RP11-761N21.2	6.24239e-252	1.73571	0.727	0.191	1.00852e-247	4	RP11-761N21.2
MT-TV	1.78053e-231	1.73424	0.61	0.127	2.87662e-227	4	MT-TV
RPS18P12	2.63005e-225	1.7278	0.427	0.053	4.24911e-221	4	RPS18P12
RP5-827C21.1	7.44945e-211	1.72457	0.45	0.067	1.20353e-206	4	RP5-827C21.1
RP11-572P18.1	2.00969e-229	1.72093	0.602	0.129	3.24686e-225	4	RP11-572P18.1
RPL34P18	1.73363e-206	1.69747	0.504	0.092	2.80085e-202	4	RPL34P18
RPS23P8	1.06943e-183	1.68572	0.502	0.106	1.72777e-179	4	RPS23P8
RPL10P9	2.93458e-209	1.67918	0.481	0.079	4.74111e-205	4	RPL10P9
RP11-475C16.1	4.77385e-233	1.67004	0.704	0.189	7.71264e-229	4	RP11-475C16.1
AC090498.1	2.59888e-215	1.65846	0.59	0.129	4.19875e-211	4	AC090498.1
RP4-765C7.21	1.02685e-245	1.65284	0.723	0.187	1.65898e-241	4	RP4-765C7.2
RPL26P19	3.25389e-189	1.64061	0.461	0.082	5.25699e-185	4	RPL26P19
RP11-864N7.2	1.42489e-218	1.6362	0.602	0.133	2.30205e-214	4	RP11-864N7.2
RP11-466H18.1	2.63945e-214	1.62909	0.7	0.208	4.26429e-210	4	RP11-466H18.1
RPS3AP47	4.92904e-178	1.62607	0.401	0.063	7.96336e-174	4	RPS3AP47
RPL7P9	2.38117e-222	1.62515	0.73	0.225	3.84701e-218	4	RPL7P9
RP11-543P15.11	4.3903e-229	1.61965	0.843	0.348	7.09296e-225	4	RP11-543P15.1
RPL39P3	1.21543e-179	1.61414	0.433	0.075	1.96365e-175	4	RPL39P3
RPL18AP3	2.59352e-218	1.61087	0.741	0.236	4.19009e-214	4	RPL18AP3
RPL13AP51	3.34854e-192	1.5927	0.632	0.174	5.4099e-188	4	RPL13AP5
AC016739.2	1.13145e-180	1.57344	0.529	0.118	1.82798e-176	4	AC016739.2
AC007969.5	1.38266e-187	1.57235	0.643	0.19	2.23383e-183	4	AC007969.5
RPS15AP1	3.2344e-177	1.55667	0.441	0.079	5.22549e-173	4	RPS15AP1
RP11-889L3.1	3.40654e-172	1.55265	0.401	0.065	5.5036e-168	4	RP11-889L3.1
MTATP6P11	6.87852e-192	1.50733	0.7	0.227	1.11129e-187	4	MTATP6P1
RP11-175B9.3	3.51934e-145	1.50052	0.324	0.048	5.68584e-141	4	RP11-175B9.3
RPS19P1	1.12893e-151	1.4988	0.287	0.034	1.82389e-147	4	RPS19P1
RPL12P4	9.07881e-145	1.49868	0.362	0.063	1.46677e-140	4	RPL12P4
RP11-146N23.1	5.21602e-155	1.48476	0.257	0.025	8.427e-151	4	RP11-146N23.1
RP3-417G15.1	1.44645e-136	1.47153	0.317	0.05	2.33688e-132	4	RP3-417G15.1
RP11-632C17--A.1	1.8494e-154	1.4631	0.496	0.12	2.98788e-150	4	RP11-632C17--A.1
RPS2P46	1.1632e-177	1.4574	0.658	0.208	1.87927e-173	4	RPS2P46
RPS13P2	3.82512e-122	1.45587	0.364	0.077	6.17986e-118	4	RPS13P2
EEF1B2P3	1.61818e-128	1.4529	0.305	0.049	2.61434e-124	4	EEF1B2P3
RPL21P75	5.79883e-143	1.43047	0.27	0.031	9.36858e-139	4	RPL21P75
RPS19P3	2.74469e-137	1.42863	0.296	0.042	4.43432e-133	4	RPS19P3
RPL5P34	3.81283e-115	1.41857	0.262	0.039	6.16001e-111	4	RPL5P34
MT-TP	9.10125e-121	1.38247	0.456	0.125	1.4704e-116	4	MT-TP
SC22CB-1E7.1	6.20184e-120	1.37253	0.334	0.064	1.00197e-115	4	SC22CB-1E7.1
RPL13AP25	8.76425e-121	1.36138	0.479	0.142	1.41595e-116	4	RPL13AP25
MT-TL1	1.09847e-119	1.34682	0.435	0.113	1.77468e-115	4	MT-TL1
MT-ATP8	7.11527e-100	1.34318	0.351	0.086	1.14954e-95	4	MT-ATP8
RPL14P1	2.60587e-117	1.33985	0.357	0.076	4.21004e-113	4	RPL14P1
CTD-2287O16.1	9.27839e-129	1.33767	0.47	0.126	1.49902e-124	4	CTD-2287O16.1
MT-RNR1	7.54833e-177	1.33417	0.906	0.602	1.21951e-172	4	MT-RNR1
RP11-371A22.1	2.13408e-112	1.3151	0.451	0.133	3.44782e-108	4	RP11-371A22.1
RPL10AP6	8.93627e-123	1.31332	0.45	0.121	1.44374e-118	4	RPL10AP6
FTLP3	7.19524e-101	1.30842	0.379	0.099	1.16246e-96	4	FTLP3
MT-ND4L	2.73609e-99	1.28749	0.502	0.184	4.42042e-95	4	MT-ND4L
RPS28P7	3.61317e-95	1.25942	0.263	0.049	5.83744e-91	4	RPS28P7
MTCO1P12	2.51749e-124	1.25546	0.529	0.166	4.06726e-120	4	MTCO1P12
ZFAS1	1.02103e-106	1.25455	0.512	0.179	1.64957e-102	4	ZFAS1
RPL411	1.13433e-210	1.24707	0.938	0.554	1.83262e-206	4	RPL41
RP11-408P14.1	3.20385e-87	1.24546	0.253	0.049	5.17614e-83	4	RP11-408P14.1
RPL23AP42	8.34329e-81	1.20295	0.291	0.07	1.34794e-76	4	RPL23AP42
RP11-425L10.1	1.60786e-83	1.18813	0.394	0.127	2.59766e-79	4	RP11-425L10.1
RPLP0P6	6.08332e-86	1.18802	0.311	0.075	9.82821e-82	4	RPLP0P6
RPS181	5.1689e-227	1.18574	0.98	0.736	8.35088e-223	4	RPS18
RPL9P91	3.2554e-125	1.17368	0.71	0.328	5.25943e-121	4	RPL9P9
MTND3P19	8.85041e-87	1.16165	0.308	0.072	1.42987e-82	4	MTND3P19
RPL3P41	8.91119e-93	1.15631	0.555	0.235	1.43969e-88	4	RPL3P4
MT-RNR2	1.94578e-199	1.13706	0.994	0.952	3.14359e-195	4	MT-RNR2
RPS7P1	2.74832e-63	1.10062	0.314	0.101	4.44018e-59	4	RPS7P1
RPL37A1	1.7082e-173	1.05769	0.941	0.627	2.75976e-169	4	RPL37A
RPL39	4.8481e-163	1.05737	0.918	0.6	7.83259e-159	4	RPL39
SNHG51	4.03044e-67	1.04477	0.447	0.184	6.51157e-63	4	SNHG5
RPL6P27	1.33776e-62	1.03979	0.379	0.142	2.16129e-58	4	RPL6P27
RPL18A1	5.94017e-156	1.03704	0.929	0.629	9.59693e-152	4	RPL18A
RPL291	4.61932e-94	1.0199	0.729	0.401	7.46297e-90	4	RPL29
SNHG61	7.46159e-70	1.01931	0.47	0.201	1.20549e-65	4	SNHG6
RPS3A1	1.08216e-184	1.00773	0.972	0.771	1.74834e-180	4	RPS3A
RPL23A1	2.31655e-121	0.997952	0.841	0.512	3.74261e-117	4	RPL23A
RPL36A	3.56158e-140	0.993014	0.891	0.596	5.75408e-136	4	RPL36A
RPL131	1.08018e-182	0.987024	0.982	0.751	1.74514e-178	4	RPL13
RPL37	1.05375e-140	0.984284	0.895	0.613	1.70243e-136	4	RPL37
RPL311	3.32875e-207	0.979188	0.986	0.839	5.37792e-203	4	RPL31
MT-TT	6.12178e-55	0.977909	0.308	0.105	9.89035e-51	4	MT-TT
GAS5	7.20872e-59	0.963167	0.529	0.279	1.16464e-54	4	GAS5
RPS22	5.02895e-133	0.950993	0.909	0.599	8.12477e-129	4	RPS2
EEF1B21	3.98732e-73	0.933132	0.667	0.396	6.44192e-69	4	EEF1B2
RPL231	6.8608e-101	0.901562	0.803	0.502	1.10843e-96	4	RPL23
RPS291	3.05194e-175	0.896183	0.986	0.802	4.93071e-171	4	RPS29
ATP5G2	4.38451e-49	0.893928	0.448	0.221	7.08361e-45	4	ATP5G2
RPL26	1.91305e-123	0.881751	0.898	0.634	3.09072e-119	4	RPL26
RPS19	2.94741e-198	0.879404	0.994	0.915	4.76184e-194	4	RPS19
RPL221	6.29072e-64	0.874727	0.587	0.323	1.01633e-59	4	RPL22
RPL121	1.34767e-86	0.864439	0.781	0.511	2.17729e-82	4	RPL12
RPL15	8.62788e-125	0.84337	0.946	0.753	1.39392e-120	4	RPL15
RPL91	1.09725e-100	0.842174	0.875	0.626	1.77272e-96	4	RPL9
HINT1	7.63695e-65	0.831032	0.658	0.39	1.23383e-60	4	HINT1
RPL361	2.11291e-126	0.816593	0.941	0.711	3.41361e-122	4	RPL36
RPS31	3.54778e-130	0.816472	0.968	0.768	5.73179e-126	4	RPS3
RPL13A1	7.47772e-126	0.815125	0.946	0.681	1.2081e-121	4	RPL13A
SNHG8	1.22139e-30	0.808881	0.274	0.122	1.97327e-26	4	SNHG8
RPS23	1.73984e-125	0.806627	0.945	0.738	2.81088e-121	4	RPS23
RPL321	2.93045e-146	0.804941	0.974	0.809	4.73444e-142	4	RPL32
RPL10A1	4.80195e-69	0.801535	0.716	0.448	7.75803e-65	4	RPL10A
RPS251	2.13608e-116	0.800745	0.923	0.662	3.45105e-112	4	RPS25
RPS51	5.51865e-54	0.788921	0.656	0.425	8.91592e-50	4	RPS5
RPL101	1.28409e-123	0.783151	0.957	0.726	2.07458e-119	4	RPL10
RPS15A1	1.36667e-113	0.780751	0.917	0.644	2.20798e-109	4	RPS15A
RPS121	2.32081e-119	0.759856	0.955	0.724	3.7495e-115	4	RPS12
RPS27A1	2.61362e-136	0.756317	0.975	0.81	4.22257e-132	4	RPS27A
RPS151	1.14684e-103	0.753057	0.935	0.717	1.85283e-99	4	RPS15
RPL27A1	1.14589e-135	0.747389	0.975	0.828	1.85129e-131	4	RPL27A
RPS13	2.13147e-75	0.736758	0.844	0.603	3.4436e-71	4	RPS13
LRRC75A-AS11	1.81301e-32	0.731921	0.479	0.294	2.9291e-28	4	LRRC75A-AS1
RPL381	6.30709e-64	0.729082	0.733	0.488	1.01897e-59	4	RPL38
RPS21	9.35116e-79	0.722131	0.831	0.588	1.51077e-74	4	RPS21
RPL35A1	3.04948e-96	0.717106	0.929	0.727	4.92674e-92	4	RPL35A
RPS91	5.86812e-51	0.706524	0.72	0.513	9.48053e-47	4	RPS9
RPL71	2.10182e-122	0.703899	0.977	0.846	3.3957e-118	4	RPL7
RPL301	5.4995e-92	0.686858	0.918	0.716	8.885e-88	4	RPL30
RPS271	3.96964e-153	0.682592	0.995	0.934	6.41335e-149	4	RPS27
RPL191	2.73794e-81	0.678905	0.889	0.698	4.42342e-77	4	RPL19
RPL111	5.67817e-80	0.676897	0.897	0.707	9.17365e-76	4	RPL11
RPS241	1.63954e-77	0.67441	0.864	0.661	2.64884e-73	4	RPS24
RPS10	1.20688e-38	0.673489	0.586	0.385	1.94984e-34	4	RPS10
RPL211	1.15579e-117	0.661901	0.986	0.867	1.86729e-113	4	RPL21
RPS61	3.2833e-117	0.658066	0.986	0.873	5.30449e-113	4	RPS6
MT-ND1	2.36518e-51	0.652592	0.786	0.606	3.82118e-47	4	MT-ND1
BTF3	1.28396e-33	0.648387	0.622	0.45	2.07437e-29	4	BTF3
RPS4X1	1.99134e-73	0.638751	0.901	0.697	3.2172e-69	4	RPS4X
RPS71	5.27283e-45	0.632771	0.663	0.442	8.51878e-41	4	RPS7
RPL341	2.12807e-133	0.629733	0.986	0.923	3.43811e-129	4	RPL34
RPS201	1.07501e-75	0.62448	0.908	0.706	1.73678e-71	4	RPS20
RPL241	1.35337e-42	0.62415	0.675	0.48	2.18651e-38	4	RPL24
RPS8	3.89185e-57	0.623811	0.82	0.645	6.28767e-53	4	RPS8
NPM1	1.69396e-24	0.618725	0.441	0.28	2.73675e-20	4	NPM1
RPL51	5.12791e-48	0.61631	0.787	0.61	8.28465e-44	4	RPL5
RPS14	5.68864e-138	0.597698	0.991	0.957	9.19057e-134	4	RPS14
RPLP11	2.50383e-86	0.594469	0.955	0.842	4.04518e-82	4	RPLP1
RPL141	3.29874e-33	0.588164	0.643	0.465	5.32945e-29	4	RPL14
RPS281	5.76986e-43	0.577177	0.718	0.513	9.32178e-39	4	RPS28
PFDN51	3.64686e-35	0.562698	0.667	0.506	5.89186e-31	4	PFDN5
RPS111	1.09432e-54	0.556074	0.852	0.691	1.76798e-50	4	RPS11
RPL7A2	8.14334e-34	0.551448	0.712	0.542	1.31564e-29	4	RPL7A
MT-CO11	1.153e-114	0.541597	0.995	0.962	1.86279e-110	4	MT-CO1
RPL61	1.71485e-36	0.538064	0.716	0.52	2.77052e-32	4	RPL6
RPS17	5.69616e-50	0.535075	0.849	0.694	9.20271e-46	4	RPS17
RPL181	1.32053e-28	0.52524	0.683	0.539	2.13344e-24	4	RPL18
RPLP21	1.61184e-63	0.507507	0.926	0.762	2.60409e-59	4	RPLP2
RPL33	1.07666e-51	0.503872	0.877	0.689	1.73945e-47	4	RPL3
MIF1	8.98961e-15	0.503112	0.28	0.168	1.45236e-10	4	MIF
RPL27	2.95882e-42	0.491995	0.797	0.633	4.78027e-38	4	RPL27
MT-ND4	2.74476e-68	0.488885	0.968	0.9	4.43444e-64	4	MT-ND4
RPL81	2.06487e-38	0.485612	0.789	0.612	3.336e-34	4	RPL8
RPL281	5.19085e-35	0.479842	0.781	0.64	8.38633e-31	4	RPL28
MT-ATP6	3.52258e-69	0.475792	0.972	0.913	5.69107e-65	4	MT-ATP6
RACK11	2.77983e-22	0.4718	0.643	0.506	4.4911e-18	4	RACK1
MT-ND3	2.49545e-28	0.45346	0.733	0.621	4.03164e-24	4	MT-ND3
RPS161	1.02287e-27	0.42815	0.773	0.629	1.65254e-23	4	RPS16
MT-CO3	7.94608e-71	0.418781	0.992	0.963	1.28377e-66	4	MT-CO3
SNRPD2	2.11017e-10	0.412797	0.421	0.333	3.40919e-06	4	SNRPD2
NACA	4.91533e-15	0.410425	0.621	0.53	7.9412e-11	4	NACA
MT-ND51	6.8219e-12	0.404328	0.465	0.366	1.10215e-07	4	MT-ND5
RPL42	7.95136e-14	0.402447	0.545	0.442	1.28462e-09	4	RPL4
FAU1	1.93713e-16	0.387797	0.667	0.577	3.12962e-12	4	FAU
FTH1	3.46661e-31	0.369712	0.726	0.495	5.60066e-27	4	FTH1
MT-ND21	1.16908e-14	0.359133	0.663	0.587	1.88877e-10	4	MT-ND2
TPT1	3.24062e-24	0.355234	0.86	0.783	5.23555e-20	4	TPT1
COX7C1	1.52169e-09	0.348584	0.521	0.458	2.45844e-05	4	COX7C
COX4I1	3.85929e-06	0.348364	0.487	0.448	0.0623507	4	COX4I1
RPLP01	1.46403e-19	0.341149	0.744	0.632	2.36528e-15	4	RPLP0
RPS27L	0.000507797	0.336787	0.327	0.291	1	4	RPS27L
SH3BGRL31	5.352e-18	0.330972	0.696	0.56	8.64669e-14	4	SH3BGRL3
ATP5L	1.31967e-09	0.330937	0.559	0.499	2.13205e-05	4	ATP5L
RPL35	1.62991e-19	0.315989	0.783	0.688	2.63328e-15	4	RPL35
RPSA1	1.48602e-07	0.302227	0.456	0.386	0.00240081	4	RPSA
UBA521	7.15494e-10	0.265975	0.653	0.588	1.15595e-05	4	UBA52
COMMD6	5.60563e-05	0.262253	0.458	0.414	0.905646	4	COMMD6
UQCRB	0.00683136	0.250921	0.33	0.301	1	4	UQCRB
MT-CYB1	3.06371e-17	0.250842	0.883	0.838	4.94973e-13	4	MT-CYB
IFITM3	9.06431e-08	0.250795	0.296	0.208	0.00146443	4	IFITM3
IGLL5	3.31424e-44	3.40726	0.276	0.089	5.35449e-40	5	IGLL5		B cell_IGLL5 high
IGLC3	4.15434e-49	3.22552	0.58	0.338	6.71175e-45	5	IGLC3
JCHAIN	2.80213e-139	3.17602	0.482	0.121	4.52712e-135	5	JCHAIN
IGLC2	1.63084e-35	3.02109	0.781	0.621	2.63479e-31	5	IGLC2
IGHG3	2.98947e-56	2.87649	0.566	0.291	4.82979e-52	5	IGHG3
IGHG4	7.08481e-52	2.84674	0.708	0.479	1.14462e-47	5	IGHG4
IGHG1	1.06449e-73	2.74349	0.664	0.378	1.71979e-69	5	IGHG1
IGHA1	1.18732e-52	2.60764	0.76	0.556	1.91823e-48	5	IGHA1
IGHG2	2.72334e-23	2.53801	0.399	0.22	4.39982e-19	5	IGHG2
IGKC	2.78013e-59	2.44836	0.966	0.934	4.49157e-55	5	IGKC
MZB1	0	2.43925	0.822	0.106	0	5	MZB1
IGHA2	3.68397e-12	2.29799	0.29	0.168	5.95182e-08	5	IGHA2
DERL3	0	2.11685	0.603	0.053	0	5	DERL3
SEC11C	0	2.01273	0.698	0.089	0	5	SEC11C
FKBP11	0	1.86541	0.42	0.017	0	5	FKBP11
HERPUD1	3.686e-258	1.85369	0.523	0.066	5.95509e-254	5	HERPUD1
PRDX4	1.07898e-257	1.65925	0.521	0.064	1.74319e-253	5	PRDX4
SSR41	3.58801e-195	1.47228	0.858	0.344	5.79678e-191	5	SSR4
XBP1	3.84273e-169	1.45103	0.585	0.134	6.20831e-165	5	XBP1
SPCS3	9.57897e-140	1.34246	0.431	0.081	1.54758e-135	5	SPCS3
ISG20	1.76723e-162	1.30145	0.44	0.07	2.85513e-158	5	ISG20
FKBP21	5.67913e-111	1.22803	0.486	0.13	9.1752e-107	5	FKBP2
MYDGF1	4.62942e-110	1.21841	0.441	0.109	7.47929e-106	5	MYDGF
ITM2C	9.32795e-131	1.21181	0.315	0.044	1.50702e-126	5	ITM2C
HSP90B11	8.25371e-92	1.19476	0.564	0.205	1.33347e-87	5	HSP90B1
SUB1	3.52689e-103	1.15995	0.664	0.26	5.69804e-99	5	SUB1
SELK	3.76826e-111	1.12587	0.418	0.093	6.088e-107	5	SELK
PLPP5	3.08285e-124	1.09128	0.253	0.028	4.98065e-120	5	PLPP5
SPCS2	1.61319e-91	1.0626	0.415	0.108	2.60627e-87	5	SPCS2
SSR3	1.016e-86	1.0313	0.361	0.086	1.64145e-82	5	SSR3
EAF2	4.50732e-46	0.946686	0.276	0.086	7.28203e-42	5	EAF2
SDF2L1	2.81153e-62	0.904727	0.301	0.079	4.54231e-58	5	SDF2L1
PPIB1	1.65504e-60	0.89038	0.425	0.15	2.67388e-56	5	PPIB
SPCS1	1.56971e-56	0.830367	0.473	0.184	2.53602e-52	5	SPCS1
SEC61G1	5.77876e-49	0.770966	0.454	0.187	9.33616e-45	5	SEC61G
TMEM2581	5.23415e-43	0.661955	0.658	0.37	8.45629e-39	5	TMEM258
SEC61B1	4.00887e-34	0.632286	0.495	0.252	6.47672e-30	5	SEC61B
TMEM59	3.1639e-32	0.620549	0.425	0.204	5.1116e-28	5	TMEM59
SEC62	5.93555e-23	0.617276	0.436	0.247	9.58947e-19	5	SEC62
TMED9	1.8992e-27	0.580331	0.292	0.121	3.06835e-23	5	TMED9
ZNF706	2.34707e-23	0.521316	0.251	0.103	3.79192e-19	5	ZNF706
HSPA51	4.98273e-18	0.516829	0.342	0.182	8.05009e-14	5	HSPA5
PDIA61	1.62519e-17	0.496576	0.306	0.159	2.62566e-13	5	PDIA6
SERP1	4.27448e-19	0.475525	0.297	0.145	6.90585e-15	5	SERP1
TMBIM62	9.39972e-17	0.450081	0.559	0.37	1.51862e-12	5	TMBIM6
OST4	7.75247e-19	0.414955	0.587	0.382	1.25249e-14	5	OST4
SSR2	6.51826e-12	0.349052	0.263	0.144	1.05309e-07	5	SSR2
NPC21	1.48218e-07	0.306297	0.302	0.201	0.00239462	5	NPC2
CD741	3.40549e-30	0.298482	0.571	0.301	5.50191e-26	5	CD74
CYBA	6.57153e-09	0.284638	0.42	0.283	0.00010617	5	CYBA
MIF2	1.59648e-07	0.261232	0.27	0.171	0.00257927	5	MIF
DAD1	1.79745e-07	0.259873	0.288	0.186	0.00290396	5	DAD1
PSME2	1.76088e-06	0.256855	0.315	0.219	0.0284488	5	PSME2
B2M1	4.52463e-10	0.255875	0.996	0.989	7.30999e-06	5	B2M
CAMP	1.58969e-246	2.06195	0.969	0.501	2.5683e-242	6	CAMP		Neutrophil C_LTF high
LTF	0	2.01813	0.942	0.292	0	6	LTF
LCN2	3.98311e-287	1.87374	0.867	0.242	6.43511e-283	6	LCN2
MMP8	7.21972e-281	1.8543	0.673	0.112	1.16642e-276	6	MMP8
RETN1	2.78842e-222	1.71299	0.704	0.171	4.50497e-218	6	RETN
S100A81	9.04902e-270	1.6166	1	0.951	1.46196e-265	6	S100A8
FOLR31	3.85766e-191	1.59086	0.611	0.138	6.23244e-187	6	FOLR3
TCN1	4.07971e-159	1.56308	0.344	0.044	6.59119e-155	6	TCN1
PGLYRP1	5.5549e-179	1.52357	0.649	0.171	8.9745e-175	6	PGLYRP1
CEACAM81	1.0521e-144	1.3956	0.498	0.112	1.69978e-140	6	CEACAM8
CYBB	2.131e-118	1.36217	0.36	0.068	3.44284e-114	6	CYBB
S100A9	2.45929e-253	1.35772	1	0.932	3.97323e-249	6	S100A9
CRISP3	1.44614e-101	1.3504	0.353	0.075	2.33638e-97	6	CRISP3
FCN1	5.41232e-159	1.31051	0.673	0.196	8.74415e-155	6	FCN1
S100A12	2.08245e-133	1.27666	0.931	0.631	3.3644e-129	6	S100A12
LYZ1	6.77588e-196	1.17012	0.985	0.51	1.09471e-191	6	LYZ
ANXA31	1.36052e-94	1.16336	0.476	0.147	2.19806e-90	6	ANXA3
MNDA1	3.39259e-105	1.13146	0.678	0.278	5.48107e-101	6	MNDA
PADI4	7.69208e-78	1.11966	0.298	0.068	1.24273e-73	6	PADI4
ALOX5AP1	1.36912e-120	1.09346	0.731	0.301	2.21195e-116	6	ALOX5AP
TMSB4XP41	3.0418e-96	1.06558	0.773	0.369	4.91434e-92	6	TMSB4XP4
CDA	9.76411e-64	1.04729	0.296	0.078	1.57749e-59	6	CDA
VIM	1.58427e-82	1.01527	0.611	0.269	2.55954e-78	6	VIM
CD241	3.08223e-61	1.01258	0.395	0.136	4.97964e-57	6	CD24
S100P1	3.63532e-76	0.991237	0.556	0.224	5.87322e-72	6	S100P
CYSTM1	1.55606e-60	0.979815	0.356	0.116	2.51397e-56	6	CYSTM1
ANXA1	5.43129e-77	0.925773	0.716	0.401	8.7748e-73	6	ANXA1
GCA1	1.26496e-61	0.910658	0.498	0.21	2.04367e-57	6	GCA
BPI1	2.98247e-77	0.906807	0.584	0.232	4.81848e-73	6	BPI
RGL42	8.37956e-38	0.874137	0.336	0.141	1.3538e-33	6	RGL4
MIR2231	3.149e-34	0.854767	0.287	0.114	5.08752e-30	6	MIR223
GRN	2.66844e-30	0.823765	0.262	0.105	4.31113e-26	6	GRN
FCER1G	1.77778e-41	0.772784	0.469	0.232	2.87218e-37	6	FCER1G
LST11	4.25773e-37	0.723673	0.444	0.225	6.87879e-33	6	LST1
EMB1	1.48868e-28	0.722541	0.324	0.15	2.40511e-24	6	EMB
APMAP	2.02847e-24	0.697539	0.269	0.123	3.27719e-20	6	APMAP
MYL6	2.12396e-77	0.673114	0.905	0.735	3.43146e-73	6	MYL6
TMSB4X1	2.75177e-116	0.664532	1	0.936	4.44576e-112	6	TMSB4X
S100A6	2.84146e-58	0.657256	0.822	0.599	4.59066e-54	6	S100A6
TKT2	7.88608e-17	0.653773	0.258	0.139	1.27407e-12	6	TKT
DEFA31	2.74775e-114	0.63724	0.982	0.648	4.43926e-110	6	DEFA3
HMGB21	1.15545e-21	0.628234	0.416	0.257	1.86675e-17	6	HMGB2
ARPC5	1.05925e-21	0.613982	0.395	0.238	1.71132e-17	6	ARPC5
TSPO	1.56863e-22	0.607273	0.422	0.259	2.53428e-18	6	TSPO
MYL12A1	7.29386e-34	0.599609	0.635	0.431	1.1784e-29	6	MYL12A
ACTB1	3.77575e-57	0.583079	0.88	0.686	6.1001e-53	6	ACTB
CD591	9.01989e-14	0.570131	0.265	0.156	1.45725e-09	6	CD59
CAP1	1.58366e-16	0.561417	0.333	0.199	2.55856e-12	6	CAP1
SLPI2	1.63809e-36	0.556317	0.507	0.255	2.64649e-32	6	SLPI
CSTA2	6.32061e-20	0.546153	0.411	0.248	1.02116e-15	6	CSTA
BLOC1S1	4.44635e-14	0.538849	0.3	0.182	7.18353e-10	6	BLOC1S1
MALAT11	3.13142e-15	0.526872	0.44	0.308	5.05913e-11	6	MALAT1
GMFG1	2.22866e-34	0.523401	0.722	0.529	3.60062e-30	6	GMFG
S100A11	1.5257e-35	0.51606	0.693	0.463	2.46492e-31	6	S100A11
CD632	2.90474e-16	0.506938	0.5	0.368	4.69289e-12	6	CD63
H2AFV2	2.90396e-10	0.483161	0.313	0.218	4.69164e-06	6	H2AFV
MS4A32	7.43613e-21	0.459278	0.487	0.301	1.20138e-16	6	MS4A3
GLRX1	2.43183e-08	0.423124	0.289	0.205	0.000392886	6	GLRX
AIF12	2.17222e-15	0.395158	0.445	0.296	3.50944e-11	6	AIF1
PFN1	3.671e-16	0.38288	0.693	0.569	5.93086e-12	6	PFN1
TYROBP	1.21961e-13	0.381767	0.447	0.31	1.97041e-09	6	TYROBP
LCP1	2.19611e-09	0.379892	0.324	0.221	3.54803e-05	6	LCP1
TXN2	3.61713e-13	0.346251	0.598	0.478	5.84384e-09	6	TXN
ACTG11	6.594e-14	0.338331	0.64	0.516	1.06533e-09	6	ACTG1
NDUFB11	5.37195e-06	0.33126	0.382	0.32	0.0867892	6	NDUFB1
ARPC3	7.19552e-08	0.314169	0.465	0.385	0.00116251	6	ARPC3
SEC621	1.56592e-05	0.313895	0.32	0.258	0.25299	6	SEC62
SON	2.63935e-06	0.310178	0.375	0.296	0.0426414	6	SON
TALDO11	0.000378607	0.302595	0.285	0.233	1	6	TALDO1
YWHAB	0.000220413	0.277321	0.34	0.287	1	6	YWHAB
PRDX52	0.00046772	0.2762	0.28	0.229	1	6	PRDX5
GNG51	6.67187e-05	0.269196	0.375	0.314	1	6	GNG5
CYBA1	4.27995e-05	0.266197	0.355	0.29	0.691469	6	CYBA
TRBC21	7.08717e-85	1.14181	0.558	0.186	1.145e-80	7	TRBC2		T cell_TRBC2 high
TRAC1	1.8877e-59	1.04309	0.426	0.141	3.04977e-55	7	TRAC
CCL51	1.05959e-110	1.03841	0.768	0.276	1.71188e-106	7	CCL5
CD521	5.42291e-78	1.00749	0.658	0.273	8.76126e-74	7	CD52
TRBC11	5.11726e-49	0.984713	0.364	0.121	8.26744e-45	7	TRBC1
GZMH1	6.12038e-48	0.900768	0.371	0.125	9.88809e-44	7	GZMH
LTB1	2.25226e-35	0.87608	0.305	0.11	3.63875e-31	7	LTB
GZMA1	1.88626e-44	0.872084	0.394	0.147	3.04745e-40	7	GZMA
IL321	1.15479e-39	0.862565	0.378	0.147	1.86568e-35	7	IL32
NKG71	7.62401e-75	0.840325	0.795	0.457	1.23173e-70	7	NKG7
IGLC7	2.46306e-53	0.839949	0.285	0.075	3.97932e-49	7	IGLC7
GZMB1	6.08765e-39	0.799516	0.369	0.141	9.83521e-35	7	GZMB
EEF1D1	6.47998e-32	0.788739	0.513	0.301	1.04691e-27	7	EEF1D
IGHA21	4.24864e-102	0.744956	0.531	0.153	6.8641e-98	7	IGHA2
GNLY1	3.59765e-62	0.742743	0.56	0.215	5.81236e-58	7	GNLY
TMSB101	4.93658e-92	0.72823	0.966	0.802	7.97554e-88	7	TMSB10
IFITM11	7.54515e-24	0.726863	0.301	0.133	1.21899e-19	7	IFITM1
CORO1A1	3.58877e-21	0.72119	0.317	0.156	5.79802e-17	7	CORO1A
CD3D1	2.20744e-21	0.693338	0.276	0.123	3.56634e-17	7	CD3D
EMP31	3.39542e-21	0.690138	0.353	0.187	5.48564e-17	7	EMP3
HCST1	7.99006e-26	0.682996	0.49	0.294	1.29087e-21	7	HCST
HLA-E1	3.68614e-21	0.632132	0.446	0.275	5.95532e-17	7	HLA-E
IGHG21	4.81183e-126	0.619755	0.665	0.205	7.77399e-122	7	IGHG2
HLA-C1	3.4686e-31	0.607265	0.677	0.47	5.60388e-27	7	HLA-C
IGHG11	1.22899e-144	0.575047	0.879	0.368	1.98556e-140	7	IGHG1
S100A41	2.78809e-30	0.574947	0.679	0.456	4.50444e-26	7	S100A4
IGHA11	3.3208e-148	0.557119	0.959	0.546	5.36509e-144	7	IGHA1
RPS282	1.87166e-32	0.556848	0.736	0.519	3.02386e-28	7	RPS28
RPL282	6.51088e-37	0.549946	0.825	0.642	1.0519e-32	7	RPL28
RPS122	1.43306e-43	0.526265	0.888	0.737	2.31525e-39	7	RPS12
RPL310	8.29459e-39	0.524081	0.872	0.696	1.34007e-34	7	RPL3
HLA-B1	4.10656e-36	0.520671	0.809	0.605	6.63456e-32	7	HLA-B
IL2RG1	1.68333e-09	0.519682	0.264	0.168	2.71959e-05	7	IL2RG
UBA522	4.14911e-27	0.511111	0.729	0.585	6.7033e-23	7	UBA52
RPL132	5.51199e-51	0.507881	0.938	0.762	8.90516e-47	7	RPL13
EDF11	4.24517e-09	0.506633	0.298	0.203	6.8585e-05	7	EDF1
SH3BGRL32	8.61966e-25	0.485173	0.729	0.563	1.39259e-20	7	SH3BGRL3
RPL212	6.91241e-53	0.481251	0.968	0.872	1.11677e-48	7	RPL21
RPL102	7.1931e-39	0.471827	0.902	0.738	1.16212e-34	7	RPL10
FAU2	6.21588e-23	0.466673	0.718	0.576	1.00424e-18	7	FAU
HLA-A1	1.02295e-19	0.461672	0.631	0.461	1.65267e-15	7	HLA-A
RPL82	1.34538e-26	0.461428	0.774	0.619	2.1736e-22	7	RPL8
RPLP22	2.76212e-30	0.456346	0.866	0.772	4.46248e-26	7	RPLP2
RPL142	2.8974e-20	0.455859	0.633	0.472	4.68104e-16	7	RPL14
TOMM71	2.76443e-07	0.451914	0.326	0.247	0.00446622	7	TOMM7
PSMB91	1.76473e-07	0.446285	0.267	0.182	0.0028511	7	PSMB9
RPS15A2	5.84343e-29	0.443018	0.838	0.659	9.44064e-25	7	RPS15A
PCBP11	1.32551e-05	0.433047	0.289	0.221	0.214149	7	PCBP1
RPS152	3.85005e-27	0.420924	0.859	0.731	6.22014e-23	7	RPS15
RPS162	1.17358e-22	0.416949	0.79	0.633	1.89603e-18	7	RPS16
ITGB21	2.76371e-08	0.415037	0.28	0.185	0.000446505	7	ITGB2
IGKC1	2.29745e-152	0.411532	1	0.932	3.71177e-148	7	IGKC
RPL182	1.00445e-16	0.404235	0.654	0.546	1.62279e-12	7	RPL18
RPL112	1.29564e-30	0.402661	0.888	0.714	2.09323e-26	7	RPL11
IFITM21	1.29288e-22	0.39271	0.636	0.434	2.08877e-18	7	IFITM2
PSME11	0.000170812	0.385132	0.285	0.229	1	7	PSME1
DDX51	1.95242e-06	0.377151	0.33	0.252	0.0315433	7	DDX5
IGHM	7.55858e-39	0.370527	0.262	0.081	1.22116e-34	7	IGHM
CALM11	2.68922e-09	0.368217	0.508	0.416	4.34471e-05	7	CALM1
MT-ND52	6.7271e-11	0.36794	0.49	0.368	1.08683e-06	7	MT-ND5
MZB11	2.86633e-19	0.366125	0.326	0.157	4.63085e-15	7	MZB1
RPS272	5.68471e-37	0.363634	0.977	0.937	9.18422e-33	7	RPS27
ACTG12	9.44274e-15	0.357605	0.656	0.517	1.52557e-10	7	ACTG1
RPL62	2.22195e-14	0.352584	0.658	0.532	3.58978e-10	7	RPL6
RPL13A2	2.00547e-24	0.352367	0.866	0.696	3.24004e-20	7	RPL13A
EEF21	0.000174801	0.350962	0.278	0.218	1	7	EEF2
UBC1	4.16457e-06	0.349384	0.371	0.299	0.0672828	7	UBC
SLC25A61	0.00103594	0.348517	0.257	0.21	1	7	SLC25A6
PFDN52	9.94423e-11	0.346975	0.595	0.517	1.60659e-06	7	PFDN5
RPS92	7.25857e-11	0.32026	0.624	0.527	1.1727e-06	7	RPS9
IGHG41	7.42347e-132	0.31579	0.909	0.469	1.19934e-127	7	IGHG4
RPSA2	8.53487e-06	0.310801	0.453	0.389	0.137889	7	RPSA
RPL52	1.71142e-15	0.309474	0.731	0.62	2.76498e-11	7	RPL5
RPS210	1.69396e-17	0.309212	0.786	0.619	2.73677e-13	7	RPS2
HBG2	9.05136e-50	0.303418	0.31	0.089	1.46234e-45	7	HBG2
EIF11	1.1048e-07	0.303065	0.576	0.52	0.00178492	7	EIF1
RPS112	8.66939e-13	0.300995	0.777	0.702	1.40063e-08	7	RPS11
RPS3A2	6.00401e-23	0.298388	0.893	0.783	9.70007e-19	7	RPS3A
RPL302	1.09691e-17	0.297736	0.847	0.729	1.77217e-13	7	RPL30
RACK12	3.81213e-07	0.286514	0.569	0.516	0.00615888	7	RACK1
RPS27A2	3.34499e-16	0.281788	0.891	0.821	5.40416e-12	7	RPS27A
RPS4X2	2.32033e-14	0.27989	0.786	0.712	3.74872e-10	7	RPS4X
ACTB2	4.30919e-15	0.277789	0.82	0.694	6.96193e-11	7	ACTB
RPS171	2.47647e-11	0.277579	0.802	0.703	4.00099e-07	7	RPS17
HBB	6.42551e-111	0.266673	0.986	0.791	1.0381e-106	7	HBB
PSAP	0.00263205	0.264924	0.253	0.209	1	7	PSAP
RPL322	2.20541e-18	0.260444	0.902	0.82	3.56306e-14	7	RPL32
SKP1	0.0061622	0.259678	0.31	0.278	1	7	SKP1
RPL10A2	6.64842e-08	0.258457	0.56	0.468	0.00107412	7	RPL10A
MS4A6A	7.70164e-266	2.07342	0.415	0.028	1.24428e-261	8	MS4A6A		Monocyte
ANXA2	3.56871e-153	1.61595	0.467	0.075	5.76562e-149	8	ANXA2
LGALS1	2.6912e-117	1.59259	0.661	0.221	4.34791e-113	8	LGALS1
RP11-1143G9.4	5.94369e-100	1.38418	0.318	0.051	9.60262e-96	8	RP11-1143G9.4
CST3	4.31788e-70	1.37795	0.27	0.052	6.97597e-66	8	CST3
LYZ2	8.74116e-80	1.36819	0.822	0.531	1.41222e-75	8	LYZ
CD742	8.58282e-107	1.33657	0.756	0.294	1.38664e-102	8	CD74
CTSS	5.76351e-78	1.32762	0.424	0.116	9.31153e-74	8	CTSS
HLA-DRA	1.08973e-71	1.19526	0.391	0.1	1.76057e-67	8	HLA-DRA
IFITM31	3.2033e-60	1.19247	0.509	0.196	5.17525e-56	8	IFITM3
HLA-DRB1	3.28511e-68	1.17605	0.367	0.093	5.30742e-64	8	HLA-DRB1
AIF13	8.49516e-72	1.15032	0.656	0.285	1.37248e-67	8	AIF1
LST12	2.20413e-57	1.07181	0.54	0.222	3.561e-53	8	LST1
FCER1G1	5.80947e-58	1.06496	0.55	0.232	9.38577e-54	8	FCER1G
FCN11	7.96656e-46	1.04251	0.495	0.219	1.28708e-41	8	FCN1
CARD16	3.90282e-38	0.958932	0.382	0.149	6.3054e-34	8	CARD16
PSAP1	3.72516e-30	0.946117	0.41	0.198	6.01837e-26	8	PSAP
TMSB4XP42	4.44968e-36	0.904533	0.649	0.386	7.1889e-32	8	TMSB4XP4
FTL1	1.83964e-107	0.897482	0.998	0.946	2.97213e-103	8	FTL
FOS	3.07377e-36	0.883105	0.313	0.108	4.96598e-32	8	FOS
TNFSF13B1	1.11286e-35	0.855547	0.261	0.081	1.79794e-31	8	TNFSF13B
C1orf162	3.82076e-32	0.85114	0.358	0.148	6.17283e-28	8	C1orf162
SAT1	2.82723e-21	0.847388	0.251	0.105	4.56766e-17	8	SAT1
CALM2	2.75824e-53	0.844168	0.732	0.399	4.45621e-49	8	CALM2
VIM1	2.84478e-35	0.824807	0.543	0.281	4.59603e-31	8	VIM
PSME21	5.46291e-34	0.811113	0.457	0.211	8.82588e-30	8	PSME2
MNDA2	1.45552e-40	0.747828	0.585	0.293	2.35153e-36	8	MNDA
DBI1	5.03632e-30	0.747084	0.431	0.203	8.13668e-26	8	DBI
S100A111	1.64807e-44	0.739871	0.754	0.464	2.66262e-40	8	S100A11
MRPL33	6.17527e-27	0.734519	0.303	0.121	9.97676e-23	8	MRPL33
GRN1	1.63084e-24	0.698039	0.273	0.107	2.63479e-20	8	GRN
CSTA3	7.26602e-29	0.689653	0.488	0.246	1.1739e-24	8	CSTA
H2AFZ2	6.24563e-26	0.668767	0.645	0.46	1.00904e-21	8	H2AFZ
S100A101	5.04228e-20	0.666447	0.294	0.134	8.14631e-16	8	S100A10
ARPC2	2.97952e-30	0.656309	0.645	0.397	4.81371e-26	8	ARPC2
S100A61	6.70399e-40	0.635172	0.825	0.604	1.0831e-35	8	S100A6
ARPC1B	1.42071e-17	0.614167	0.4	0.227	2.2953e-13	8	ARPC1B
TYROBP1	3.39488e-18	0.605118	0.495	0.309	5.48476e-14	8	TYROBP
STMN12	2.23804e-11	0.596899	0.382	0.252	3.61579e-07	8	STMN1
POMP	7.22864e-20	0.591426	0.41	0.222	1.16786e-15	8	POMP
S100A42	3.8352e-27	0.590591	0.701	0.455	6.19616e-23	8	S100A4
ISG15	3.36072e-13	0.590492	0.284	0.149	5.42958e-09	8	ISG15
NDUFA12	1.98273e-15	0.587923	0.336	0.185	3.2033e-11	8	NDUFA12
ARPC31	5.50878e-25	0.574841	0.611	0.376	8.89999e-21	8	ARPC3
ARPC51	1.0123e-20	0.574099	0.441	0.238	1.63547e-16	8	ARPC5
TMSB4X2	1.21656e-62	0.573021	0.993	0.938	1.96547e-58	8	TMSB4X
BST2	2.64163e-13	0.571234	0.277	0.147	4.26782e-09	8	BST2
TMSB102	2.70855e-53	0.554928	0.972	0.802	4.37593e-49	8	TMSB10
PSMA41	1.44999e-13	0.551426	0.31	0.171	2.34261e-09	8	PSMA4
HSBP11	9.35707e-16	0.537462	0.327	0.173	1.51173e-11	8	HSBP1
VPS291	9.08612e-13	0.532945	0.336	0.195	1.46795e-08	8	VPS29
HMGB22	2.94936e-11	0.532776	0.396	0.262	4.76499e-07	8	HMGB2
MYL12A2	3.45263e-21	0.525774	0.652	0.434	5.57808e-17	8	MYL12A
GMFG2	2.25158e-26	0.507047	0.751	0.531	3.63765e-22	8	GMFG
HMGB11	1.17692e-16	0.500087	0.505	0.314	1.90142e-12	8	HMGB1
CKLF	5.02794e-13	0.491123	0.27	0.139	8.12314e-09	8	CKLF
NPC22	1.24695e-12	0.484718	0.346	0.201	2.01456e-08	8	NPC2
ENO11	9.21786e-12	0.46209	0.412	0.268	1.48924e-07	8	ENO1
COX6C1	1.01178e-15	0.462043	0.517	0.333	1.63463e-11	8	COX6C
CAP11	5.17359e-11	0.461404	0.336	0.201	8.35845e-07	8	CAP1
H2AFV3	3.74331e-10	0.459116	0.344	0.218	6.0477e-06	8	H2AFV
ATP5H1	1.63718e-09	0.453222	0.251	0.145	2.64503e-05	8	ATP5H
H3F3B	3.38757e-14	0.453049	0.597	0.434	5.47295e-10	8	H3F3B
ATP5O	2.59466e-12	0.448684	0.443	0.289	4.19193e-08	8	ATP5O
SON1	1.47636e-13	0.447249	0.455	0.292	2.38521e-09	8	SON
SRP9	8.62396e-10	0.445185	0.251	0.142	1.39329e-05	8	SRP9
LCP11	1.37587e-10	0.444994	0.358	0.22	2.22286e-06	8	LCP1
NOP10	9.40571e-11	0.44482	0.391	0.257	1.51959e-06	8	NOP10
SHFM11	6.78759e-13	0.440255	0.417	0.258	1.0966e-08	8	SHFM1
BLOC1S11	3.52659e-10	0.439082	0.308	0.184	5.69755e-06	8	BLOC1S1
PSMB3	8.63388e-10	0.43648	0.329	0.206	1.39489e-05	8	PSMB3
B2M2	2.78084e-52	0.436227	1	0.989	4.49272e-48	8	B2M
GNG52	1.44165e-14	0.435657	0.483	0.308	2.32913e-10	8	GNG5
COX8A1	1.9808e-09	0.425844	0.334	0.215	3.20019e-05	8	COX8A
MGST11	9.61838e-10	0.420006	0.254	0.143	1.55394e-05	8	MGST1
MINOS11	5.31817e-07	0.418101	0.258	0.167	0.00859204	8	MINOS1
YWHAB1	4.20781e-11	0.415884	0.429	0.282	6.79813e-07	8	YWHAB
MGST3	1.92196e-09	0.415751	0.251	0.143	3.10512e-05	8	MGST3
H2AFY2	5.07329e-09	0.41495	0.256	0.148	8.19641e-05	8	H2AFY
OAZ11	4.71468e-14	0.412986	0.685	0.523	7.61703e-10	8	OAZ1
ATP6V1G1	5.78098e-08	0.409855	0.263	0.162	0.000933975	8	ATP6V1G1
FTH11	1.13269e-06	0.409095	0.621	0.511	0.0182997	8	FTH1
VAMP82	5.65237e-10	0.408628	0.445	0.297	9.13197e-06	8	VAMP8
ANAPC11	5.7729e-07	0.401075	0.294	0.198	0.00932669	8	ANAPC11
CD531	4.89313e-10	0.400751	0.256	0.141	7.90534e-06	8	CD53
PLAC82	2.25883e-10	0.399882	0.536	0.392	3.64936e-06	8	PLAC8
RNASE22	5.56351e-13	0.390095	0.531	0.35	8.98841e-09	8	RNASE2
DYNLL1	7.50111e-06	0.388869	0.306	0.214	0.121188	8	DYNLL1
RHOA1	3.12562e-10	0.383635	0.377	0.24	5.04975e-06	8	RHOA
SH3BGRL33	2.16802e-16	0.378515	0.754	0.562	3.50265e-12	8	SH3BGRL3
NDUFB12	1.60341e-10	0.375171	0.464	0.316	2.59047e-06	8	NDUFB1
NDUFB91	3.33909e-10	0.370227	0.431	0.292	5.39464e-06	8	NDUFB9
NDUFC21	9.73284e-08	0.368296	0.299	0.193	0.00157244	8	NDUFC2
ATP5J21	1.20964e-08	0.36644	0.481	0.349	0.00019543	8	ATP5J2
TPI11	2.77422e-06	0.363784	0.287	0.194	0.0448203	8	TPI1
COX7B	3.26356e-09	0.361739	0.417	0.282	5.2726e-05	8	COX7B
C14orf2	8.21077e-09	0.361591	0.491	0.363	0.000132653	8	C14orf2
SLIRP1	1.05847e-10	0.3573	0.412	0.265	1.71006e-06	8	SLIRP
S100A82	6.24478e-26	0.352555	0.972	0.954	1.00891e-21	8	S100A8
UQCR101	1.92282e-08	0.349722	0.469	0.339	0.00031065	8	UQCR10
TUBA1B	5.37372e-05	0.34526	0.419	0.343	0.868179	8	TUBA1B
PTMA1	1.23807e-12	0.344964	0.756	0.657	2.00022e-08	8	PTMA
NDUFB21	2.23941e-09	0.344658	0.436	0.292	3.61799e-05	8	NDUFB2
LSM52	2.31558e-07	0.342376	0.315	0.209	0.00374106	8	LSM5
ANXA11	1.23885e-10	0.341298	0.576	0.417	2.00149e-06	8	ANXA1
TRAPPC1	2.22981e-07	0.340293	0.306	0.198	0.00360248	8	TRAPPC1
COX5B	2.19443e-09	0.338162	0.415	0.271	3.54533e-05	8	COX5B
COX7A2	8.91749e-09	0.336418	0.509	0.365	0.000144071	8	COX7A2
PSMB92	5.40638e-05	0.331502	0.263	0.183	0.873455	8	PSMB9
SNRPG1	2.13118e-06	0.325976	0.4	0.294	0.0344314	8	SNRPG
LAMTOR5	1.1773e-05	0.32579	0.287	0.2	0.190204	8	LAMTOR5
LSM31	0.000120697	0.322548	0.299	0.223	1	8	LSM3
DAZAP2	7.59113e-07	0.322344	0.322	0.214	0.0122642	8	DAZAP2
ATP5L1	2.00021e-09	0.314761	0.635	0.496	3.23153e-05	8	ATP5L
UQCR111	3.65233e-07	0.314393	0.493	0.382	0.00590071	8	UQCR11
RAN1	4.49878e-06	0.310655	0.37	0.272	0.0726823	8	RAN
CLIC11	3.47255e-06	0.30916	0.31	0.212	0.0561025	8	CLIC1
ITM2B1	0.000299088	0.305324	0.291	0.219	1	8	ITM2B
PRR13	3.29521e-07	0.304225	0.308	0.2	0.00532373	8	PRR13
USMG51	1.92525e-07	0.303411	0.424	0.299	0.00311044	8	USMG5
CFL11	1.8893e-09	0.302929	0.697	0.579	3.05236e-05	8	CFL1
ATP5E	1.97734e-12	0.298766	0.832	0.716	3.1946e-08	8	ATP5E
LAPTM5	4.0426e-05	0.294507	0.398	0.303	0.653122	8	LAPTM5
SUB11	2.14239e-08	0.288547	0.415	0.287	0.000346125	8	SUB1
NAA381	3.66036e-05	0.288098	0.277	0.193	0.591368	8	NAA38
SERF22	5.18334e-16	0.284651	0.891	0.771	8.37421e-12	8	SERF2
ITGB22	1.05158e-06	0.282903	0.287	0.185	0.0169894	8	ITGB2
PFN11	1.63658e-08	0.277966	0.69	0.572	0.000264407	8	PFN1
HNRNPK	1.73025e-05	0.277829	0.329	0.233	0.279539	8	HNRNPK
GSTP12	7.49977e-07	0.277751	0.483	0.366	0.0121166	8	GSTP1
HSPE1	0.000764685	0.274399	0.265	0.199	1	8	HSPE1
ALDOA	3.28132e-06	0.274246	0.263	0.169	0.0530131	8	ALDOA
PSMA7	6.69648e-05	0.273999	0.367	0.277	1	8	PSMA7
NDUFA31	4.24673e-05	0.273697	0.36	0.269	0.686102	8	NDUFA3
EIF3K	0.000120173	0.273591	0.265	0.19	1	8	EIF3K
HSP90AA12	0.000254625	0.273502	0.308	0.23	1	8	HSP90AA1
IFI61	2.00441e-06	0.273108	0.254	0.162	0.0323832	8	IFI6
ATP5G21	0.00291791	0.27295	0.296	0.24	1	8	ATP5G2
TCEB2	3.03391e-06	0.27097	0.481	0.361	0.0490158	8	TCEB2
ATP5F1	5.07486e-05	0.265097	0.251	0.172	0.819895	8	ATP5F1
TMA7	1.77706e-06	0.262691	0.578	0.455	0.0287102	8	TMA7
NDUFA41	6.66077e-07	0.26232	0.54	0.406	0.0107611	8	NDUFA4
C4orf3	3.47551e-05	0.259414	0.299	0.211	0.561503	8	C4orf3
HNRNPA2B11	0.0012753	0.258006	0.303	0.24	1	8	HNRNPA2B1
S100A91	1.08222e-17	0.256052	0.967	0.936	1.74844e-13	8	S100A9
NDUFA11	9.44726e-05	0.251525	0.415	0.317	1	8	NDUFA1
CA1	9.98758e-271	2.22346	0.731	0.102	1.61359e-266	9	CA1		Erythroid cell
PRDX2	9.61803e-259	2.14474	0.875	0.19	1.55389e-254	9	PRDX2
BLVRB	0	2.01071	0.858	0.123	0	9	BLVRB
AHSP	3.09775e-242	2.00557	0.903	0.216	5.00472e-238	9	AHSP
IFI27	1.63904e-118	1.60262	0.358	0.048	2.64804e-114	9	IFI27
HBB1	1.64926e-147	1.59586	0.981	0.794	2.66454e-143	9	HBB
APOC1	6.27133e-305	1.56472	0.333	0.008	1.0132e-300	9	APOC1
HBD	4.04844e-181	1.56238	0.822	0.214	6.54066e-177	9	HBD
TMEM14C	1.03737e-212	1.51835	0.506	0.052	1.67598e-208	9	TMEM14C
REXO2	2.08711e-244	1.50587	0.503	0.042	3.37194e-240	9	REXO2
TMEM14B	1.47246e-200	1.5051	0.558	0.069	2.3789e-196	9	TMEM14B
ATPIF1	1.17977e-160	1.48791	0.875	0.279	1.90603e-156	9	ATPIF1
CA2	2.20256e-213	1.48177	0.439	0.036	3.55846e-209	9	CA2
SLIRP2	9.75043e-155	1.45718	0.844	0.241	1.57528e-150	9	SLIRP
AKR1C3	1.15739e-270	1.45115	0.35	0.013	1.86988e-266	9	AKR1C3
HSPE11	7.60734e-136	1.44544	0.694	0.174	1.22904e-131	9	HSPE1
MPC2	1.30001e-153	1.42695	0.556	0.09	2.1003e-149	9	MPC2
TFRC	1.12151e-149	1.36902	0.381	0.041	1.81191e-145	9	TFRC
UROD	2.60873e-147	1.33952	0.528	0.085	4.21466e-143	9	UROD
FAM178B	3.43254e-224	1.31787	0.294	0.011	5.54561e-220	9	FAM178B
KIAA0101	1.19801e-143	1.31141	0.564	0.099	1.93551e-139	9	KIAA0101
CD36	2.38563e-159	1.29156	0.369	0.035	3.85422e-155	9	CD36
HBA1	3.88644e-84	1.28432	0.919	0.656	6.27894e-80	9	HBA1
FTH12	3.88045e-146	1.27971	0.964	0.492	6.26925e-142	9	FTH1
HMGB12	7.32275e-116	1.25937	0.819	0.297	1.18306e-111	9	HMGB1
ATP5G11	1.34145e-110	1.20281	0.653	0.17	2.16725e-106	9	ATP5G1
SRI	1.01757e-104	1.17741	0.519	0.112	1.64398e-100	9	SRI
BOLA3	7.40359e-133	1.17603	0.367	0.043	1.19612e-128	9	BOLA3
RAN2	1.48353e-106	1.17347	0.753	0.25	2.39679e-102	9	RAN
FBXO7	4.73191e-134	1.1652	0.356	0.04	7.64487e-130	9	FBXO7
SOD1	1.40129e-114	1.14833	0.619	0.142	2.26392e-110	9	SOD1
NPM11	4.08697e-113	1.14257	0.8	0.266	6.60291e-109	9	NPM1
NOP101	1.53249e-93	1.13967	0.717	0.239	2.47589e-89	9	NOP10
GYPB	6.35874e-125	1.13545	0.317	0.033	1.02732e-120	9	GYPB
HSPD1	1.95576e-103	1.12099	0.425	0.075	3.15973e-99	9	HSPD1
SNRPE	4.55065e-107	1.10777	0.703	0.195	7.35202e-103	9	SNRPE
GYPA	1.12246e-103	1.1039	0.297	0.036	1.81345e-99	9	GYPA
METAP2	1.91663e-99	1.0737	0.35	0.053	3.09651e-95	9	METAP2
CCNB1	5.98153e-103	1.07282	0.275	0.031	9.66377e-99	9	CCNB1
CACYBP	9.16954e-92	1.06071	0.414	0.079	1.48143e-87	9	CACYBP
LXN	1.5291e-124	1.05725	0.256	0.021	2.47042e-120	9	LXN
NME1	4.80894e-78	1.04581	0.403	0.086	7.76932e-74	9	NME1
MRPL13	2.57881e-83	1.04401	0.358	0.065	4.16633e-79	9	MRPL13
NDUFB6	7.627e-73	1.03399	0.547	0.159	1.23222e-68	9	NDUFB6
HBA2	3.49095e-44	0.997925	0.875	0.698	5.63998e-40	9	HBA2
HMBS	7.88397e-94	0.992792	0.283	0.036	1.27373e-89	9	HMBS
RPL22L1	5.13862e-76	0.99256	0.386	0.081	8.30195e-72	9	RPL22L1
CKS2	1.75066e-71	0.990388	0.436	0.106	2.82837e-67	9	CKS2
CALM21	7.57434e-65	0.987866	0.8	0.398	1.22371e-60	9	CALM2
BLVRA	2.56124e-85	0.986404	0.342	0.058	4.13795e-81	9	BLVRA
PRDX3	3.79962e-79	0.983123	0.475	0.114	6.13866e-75	9	PRDX3
SNRPD11	7.92354e-70	0.980151	0.617	0.205	1.28013e-65	9	SNRPD1
TUBA1B1	2.28978e-81	0.975377	0.783	0.322	3.69937e-77	9	TUBA1B
HEBP1	9.04911e-112	0.97419	0.256	0.024	1.46197e-107	9	HEBP1
AK6	3.36153e-72	0.970124	0.325	0.061	5.43089e-68	9	AK6
POMP1	7.64227e-62	0.955077	0.592	0.213	1.23468e-57	9	POMP
NME4	1.95275e-68	0.950099	0.308	0.058	3.15487e-64	9	NME4
SNRPG2	1.763e-67	0.945121	0.714	0.276	2.8483e-63	9	SNRPG
YBX1	2.38586e-67	0.93975	0.561	0.174	3.8546e-63	9	YBX1
STMN13	1.09781e-64	0.934023	0.653	0.237	1.77362e-60	9	STMN1
GYPC1	1.91878e-69	0.928897	0.5	0.136	3.09999e-65	9	GYPC
NOP58	7.1143e-75	0.928699	0.342	0.064	1.14939e-70	9	NOP58
GTF3C6	1.4524e-66	0.926903	0.444	0.115	2.34649e-62	9	GTF3C6
ATP5G3	1.01637e-62	0.922573	0.583	0.193	1.64205e-58	9	ATP5G3
CKS1B	3.13501e-60	0.920093	0.336	0.075	5.06493e-56	9	CKS1B
TAF9	3.43739e-55	0.92008	0.353	0.088	5.55345e-51	9	TAF9
MGST31	8.37351e-46	0.909312	0.414	0.135	1.35282e-41	9	MGST3
RPS261	8.83663e-85	0.908072	0.944	0.562	1.42765e-80	9	RPS26
PTTG1	3.7667e-68	0.904804	0.428	0.103	6.08548e-64	9	PTTG1
MINOS12	7.27405e-64	0.902411	0.514	0.152	1.1752e-59	9	MINOS1
RANBP1	7.75325e-76	0.894076	0.431	0.096	1.25262e-71	9	RANBP1
HMGA1	4.2233e-62	0.892137	0.336	0.074	6.82316e-58	9	HMGA1
CCT6A	1.28599e-72	0.891164	0.336	0.064	2.07765e-68	9	CCT6A
MRPL21	3.58341e-68	0.890947	0.333	0.067	5.78935e-64	9	MRPL21
TCP1	8.93212e-72	0.88798	0.328	0.061	1.44307e-67	9	TCP1
HSP90AA13	1.0827e-50	0.868071	0.567	0.216	1.7492e-46	9	HSP90AA1
SNRPC	1.30363e-54	0.866445	0.458	0.139	2.10614e-50	9	SNRPC
ATP5C1	1.34246e-60	0.86637	0.4	0.1	2.16887e-56	9	ATP5C1
TIMM8B1	1.23228e-57	0.864582	0.489	0.149	1.99087e-53	9	TIMM8B
HBM	2.46997e-61	0.853901	0.411	0.108	3.99048e-57	9	HBM
NDUFAB1	2.33834e-64	0.844907	0.469	0.125	3.77783e-60	9	NDUFAB1
CENPW	1.14997e-50	0.841894	0.303	0.071	1.85789e-46	9	CENPW
NHP2	3.81214e-62	0.838256	0.422	0.108	6.15889e-58	9	NHP2
PA2G4	9.25879e-60	0.835432	0.361	0.085	1.49585e-55	9	PA2G4
SLC25A51	3.47965e-62	0.832558	0.461	0.126	5.62173e-58	9	SLC25A5
LDHB2	5.99006e-55	0.830753	0.644	0.252	9.67754e-51	9	LDHB
DDX18	1.33561e-45	0.829826	0.308	0.079	2.15781e-41	9	DDX18
TXNL1	7.59841e-59	0.828917	0.308	0.065	1.2276e-54	9	TXNL1
PSMB5	2.3916e-53	0.828725	0.292	0.064	3.86387e-49	9	PSMB5
TPRKB	1.43272e-47	0.827646	0.342	0.092	2.31471e-43	9	TPRKB
PHB	1.84933e-55	0.820656	0.286	0.059	2.98778e-51	9	PHB
VDAC3	3.40934e-44	0.815819	0.325	0.089	5.50813e-40	9	VDAC3
DANCR	4.66293e-57	0.814904	0.258	0.048	7.53343e-53	9	DANCR
SRSF7	2.95095e-52	0.814467	0.467	0.144	4.76756e-48	9	SRSF7
COX7B1	1.86325e-51	0.813131	0.661	0.268	3.01026e-47	9	COX7B
SYNGR11	6.21366e-61	0.803955	0.45	0.121	1.00388e-56	9	SYNGR1
EXOSC8	6.52234e-52	0.803275	0.303	0.069	1.05375e-47	9	EXOSC8
SSBP1	3.46116e-54	0.797742	0.506	0.16	5.59185e-50	9	SSBP1
CCT2	4.37055e-59	0.793758	0.264	0.049	7.06106e-55	9	CCT2
MRPL22	7.33405e-49	0.790447	0.3	0.071	1.18489e-44	9	MRPL22
UQCRQ1	2.0803e-55	0.78783	0.767	0.353	3.36094e-51	9	UQCRQ
UQCC2	1.11583e-51	0.782442	0.292	0.065	1.80273e-47	9	UQCC2
ILF2	4.83282e-55	0.779521	0.339	0.08	7.8079e-51	9	ILF2
NDUFC1	2.84138e-52	0.774502	0.458	0.137	4.59053e-48	9	NDUFC1
ERH	1.64867e-45	0.769023	0.381	0.111	2.66359e-41	9	ERH
TCEB1	1.48677e-37	0.767772	0.378	0.126	2.40202e-33	9	TCEB1
TIMM13	2.81806e-47	0.764208	0.311	0.078	4.55286e-43	9	TIMM13
PCNA	2.63677e-45	0.761791	0.378	0.11	4.25996e-41	9	PCNA
NUTF2	3.08941e-48	0.759833	0.261	0.056	4.99124e-44	9	NUTF2
H2AFZ3	3.63871e-53	0.759027	0.842	0.45	5.87871e-49	9	H2AFZ
EIF5B	2.94095e-41	0.757061	0.364	0.112	4.7514e-37	9	EIF5B
PSMB1	2.16669e-43	0.756196	0.517	0.193	3.5005e-39	9	PSMB1
TRMT112	1.48203e-44	0.754481	0.514	0.186	2.39436e-40	9	TRMT112
NDUFA8	9.262e-50	0.754059	0.269	0.058	1.49637e-45	9	NDUFA8
SSB	1.55317e-40	0.751179	0.289	0.077	2.5093e-36	9	SSB
DUT	7.78283e-45	0.750488	0.461	0.156	1.25739e-40	9	DUT
HSP90AB11	7.37648e-42	0.74594	0.414	0.138	1.19174e-37	9	HSP90AB1
SNRPB	4.75549e-46	0.7451	0.361	0.101	7.68297e-42	9	SNRPB
MRPL27	1.08829e-46	0.743803	0.286	0.067	1.75824e-42	9	MRPL27
MRPS15	4.28508e-51	0.739761	0.267	0.056	6.92298e-47	9	MRPS15
RP11-620J15.31	8.98277e-45	0.730013	0.342	0.094	1.45126e-40	9	RP11-620J15.3
NDUFS5	3.24998e-43	0.725805	0.617	0.259	5.25066e-39	9	NDUFS5
SNRPD3	4.87375e-46	0.724879	0.392	0.115	7.87402e-42	9	SNRPD3
TUBB	5.73859e-46	0.724849	0.528	0.19	9.27127e-42	9	TUBB
HMGB23	3.25929e-47	0.719799	0.628	0.25	5.26572e-43	9	HMGB2
NDUFB4	1.73071e-39	0.718833	0.417	0.142	2.79613e-35	9	NDUFB4
GADD45GIP1	4.36174e-45	0.715834	0.314	0.081	7.04683e-41	9	GADD45GIP1
PTMA2	9.05578e-62	0.710092	0.942	0.647	1.46305e-57	9	PTMA
ATP5O1	1.43874e-42	0.709033	0.647	0.279	2.32442e-38	9	ATP5O
SNRPF1	1.32983e-42	0.703232	0.428	0.139	2.14847e-38	9	SNRPF
POLR2I	5.55875e-40	0.700833	0.308	0.085	8.98071e-36	9	POLR2I
ATP5F11	1.02546e-39	0.697561	0.456	0.16	1.65674e-35	9	ATP5F1
RPA3	9.39829e-42	0.694843	0.378	0.116	1.51839e-37	9	RPA3
S100A62	1.74233e-70	0.693225	0.944	0.599	2.81491e-66	9	S100A6
PEBP1	6.0049e-36	0.691429	0.381	0.129	9.70152e-32	9	PEBP1
GTF2A2	5.36647e-36	0.690418	0.344	0.11	8.67007e-32	9	GTF2A2
COX6C2	5.58941e-43	0.687056	0.711	0.323	9.03024e-39	9	COX6C
CYC1	8.97985e-48	0.686983	0.278	0.063	1.45078e-43	9	CYC1
PSMA3	4.93955e-35	0.68263	0.289	0.084	7.98033e-31	9	PSMA3
EIF3M	1.20535e-32	0.682312	0.333	0.11	1.94736e-28	9	EIF3M
PSMB6	1.4452e-36	0.682296	0.436	0.158	2.33487e-32	9	PSMB6
ETFB	7.35885e-43	0.679897	0.294	0.075	1.1889e-38	9	ETFB
SF3B6	9.95707e-41	0.678459	0.481	0.169	1.60866e-36	9	SF3B6
SDHD	6.3261e-46	0.67723	0.258	0.057	1.02204e-41	9	SDHD
HSPA81	2.33215e-30	0.675747	0.456	0.187	3.76782e-26	9	HSPA8
HNRNPC	6.48586e-39	0.673383	0.475	0.173	1.04786e-34	9	HNRNPC
MRPS21	4.04225e-34	0.673233	0.408	0.148	6.53066e-30	9	MRPS21
ATG3	1.42878e-40	0.671082	0.275	0.069	2.30834e-36	9	ATG3
ATP5I1	8.55273e-38	0.660853	0.708	0.366	1.38178e-33	9	ATP5I
EIF5A	1.79587e-41	0.657367	0.256	0.06	2.90141e-37	9	EIF5A
MRPS18C1	1.23859e-38	0.656649	0.433	0.148	2.00107e-34	9	MRPS18C
CYCS	2.11994e-34	0.656126	0.336	0.108	3.42498e-30	9	CYCS
NDUFA6	5.41677e-40	0.655627	0.392	0.123	8.75133e-36	9	NDUFA6
ATP5J1	4.29759e-34	0.653605	0.694	0.367	6.94319e-30	9	ATP5J
ECH1	3.62117e-32	0.649264	0.292	0.089	5.85036e-28	9	ECH1
PSMA2	3.46597e-32	0.639092	0.392	0.141	5.59961e-28	9	PSMA2
DNAJC19	5.39919e-36	0.636279	0.256	0.067	8.72293e-32	9	DNAJC19
MRPL511	8.2127e-37	0.635824	0.556	0.229	1.32684e-32	9	MRPL51
DPY30	2.60989e-31	0.634059	0.272	0.082	4.21653e-27	9	DPY30
EEF1E1	8.12098e-33	0.630549	0.256	0.071	1.31203e-28	9	EEF1E1
ESD	6.4727e-40	0.629349	0.264	0.065	1.04573e-35	9	ESD
EIF3I	8.45956e-35	0.625092	0.289	0.083	1.36673e-30	9	EIF3I
SNU13	6.42737e-36	0.624478	0.372	0.123	1.03841e-31	9	SNU13
RPL351	1.09489e-58	0.623296	0.956	0.683	1.7689e-54	9	RPL35
SRSF3	8.66391e-28	0.614906	0.419	0.173	1.39974e-23	9	SRSF3
SNRPD21	4.45311e-34	0.611673	0.672	0.322	7.19445e-30	9	SNRPD2
MDH1	1.82862e-30	0.610821	0.258	0.077	2.95432e-26	9	MDH1
C8orf59	3.72424e-31	0.609272	0.372	0.133	6.01688e-27	9	C8orf59
UBB	1.92054e-40	0.606442	0.9	0.579	3.10283e-36	9	UBB
LSM53	2.47246e-30	0.605862	0.481	0.2	3.9945e-26	9	LSM5
RPLP02	2.997e-49	0.605431	0.908	0.628	4.84195e-45	9	RPLP0
HSPB1	2.51417e-36	0.602627	0.328	0.098	4.0619e-32	9	HSPB1
LSM32	1.9463e-30	0.601917	0.503	0.212	3.14444e-26	9	LSM3
RPS211	8.66745e-48	0.601819	0.903	0.595	1.40031e-43	9	RPS21
COX6A1	3.30244e-30	0.599843	0.489	0.205	5.33542e-26	9	COX6A1
PSMA42	1.11501e-27	0.595421	0.414	0.166	1.8014e-23	9	PSMA4
ATP5A11	9.15177e-35	0.589561	0.506	0.199	1.47856e-30	9	ATP5A1
PPIA1	6.69807e-29	0.588216	0.692	0.396	1.08214e-24	9	PPIA
CWC15	1.22109e-24	0.587625	0.261	0.088	1.9728e-20	9	CWC15
PARK7	4.75769e-27	0.58583	0.394	0.157	7.68653e-23	9	PARK7
SERBP1	1.65999e-33	0.585227	0.3	0.09	2.68187e-29	9	SERBP1
SRP14	9.73352e-30	0.584941	0.686	0.388	1.57255e-25	9	SRP14
SKP11	2.88087e-30	0.584574	0.581	0.262	4.65433e-26	9	SKP1
ATP5J22	2.50764e-29	0.582759	0.658	0.34	4.05134e-25	9	ATP5J2
AK2	6.72152e-29	0.579648	0.258	0.078	1.08593e-24	9	AK2
NCL	1.26492e-29	0.579189	0.283	0.089	2.04361e-25	9	NCL
RBX1	4.68086e-30	0.574625	0.553	0.245	7.56239e-26	9	RBX1
CBX3	5.04296e-24	0.573297	0.339	0.133	8.14741e-20	9	CBX3
ACP1	3.11633e-24	0.572911	0.256	0.087	5.03474e-20	9	ACP1
UQCRH	2.70619e-29	0.568991	0.603	0.286	4.37212e-25	9	UQCRH
VPS292	7.87792e-27	0.568763	0.45	0.19	1.27276e-22	9	VPS29
PTGES3	2.96317e-32	0.567404	0.367	0.125	4.78731e-28	9	PTGES3
SRP91	1.53315e-29	0.555184	0.375	0.136	2.47695e-25	9	SRP9
EIF2S21	1.67375e-21	0.552824	0.403	0.182	2.70411e-17	9	EIF2S2
DNAJA1	1.27132e-28	0.552349	0.267	0.082	2.05395e-24	9	DNAJA1
SUMO1	9.89303e-28	0.551905	0.256	0.078	1.59832e-23	9	SUMO1
PPA1	1.30756e-31	0.551863	0.267	0.077	2.11249e-27	9	PPA1
PRDX1	2.25508e-27	0.542879	0.308	0.105	3.6433e-23	9	PRDX1
TCEB21	4.95582e-25	0.54246	0.65	0.352	8.00662e-21	9	TCEB2
MORF4L1	1.54047e-20	0.538122	0.283	0.111	2.48879e-16	9	MORF4L1
UQCR102	1.30758e-27	0.535726	0.647	0.329	2.11253e-23	9	UQCR10
COX5A	1.65785e-29	0.535521	0.464	0.188	2.67842e-25	9	COX5A
RPL242	2.08528e-33	0.533851	0.817	0.481	3.36897e-29	9	RPL24
NDUFB81	6.86193e-23	0.530911	0.439	0.196	1.10861e-18	9	NDUFB8
NDUFA42	6.58459e-28	0.528613	0.719	0.397	1.06381e-23	9	NDUFA4
NDUFS6	3.82937e-22	0.525727	0.319	0.124	6.18673e-18	9	NDUFS6
NDUFB92	9.04948e-26	0.523548	0.578	0.284	1.46203e-21	9	NDUFB9
COX5B1	2.89738e-24	0.519868	0.553	0.264	4.681e-20	9	COX5B
NDUFS8	1.51334e-20	0.517054	0.261	0.097	2.44496e-16	9	NDUFS8
NDUFA2	5.22332e-26	0.516998	0.383	0.149	8.43879e-22	9	NDUFA2
C14orf21	1.12645e-23	0.514727	0.667	0.354	1.81989e-19	9	C14orf2
BANF1	1.70945e-24	0.511885	0.281	0.097	2.76178e-20	9	BANF1
RPL271	2.03721e-37	0.498587	0.928	0.633	3.29132e-33	9	RPL27
SAP18	1.09824e-21	0.4962	0.397	0.174	1.77432e-17	9	SAP18
FAM96A	2.32239e-23	0.488819	0.294	0.107	3.75205e-19	9	FAM96A
RPL382	2.15921e-31	0.487001	0.853	0.493	3.48842e-27	9	RPL38
NAA382	6.90934e-18	0.485	0.392	0.187	1.11627e-13	9	NAA38
ANAPC111	5.85742e-25	0.48284	0.444	0.19	9.46325e-21	9	ANAPC11
TXN3	7.95593e-26	0.480252	0.792	0.471	1.28536e-21	9	TXN
TXNDC17	6.73079e-18	0.479922	0.3	0.126	1.08743e-13	9	TXNDC17
MRPL20	8.73045e-21	0.479132	0.308	0.122	1.41049e-16	9	MRPL20
C14orf166	9.1548e-20	0.477163	0.267	0.102	1.47905e-15	9	C14orf166
SUB12	9.40249e-25	0.472834	0.581	0.278	1.51907e-20	9	SUB1
POLR2L	2.73418e-21	0.471902	0.528	0.263	4.41734e-17	9	POLR2L
C11orf58	3.39743e-17	0.470894	0.281	0.116	5.48888e-13	9	C11orf58
NDUFB3	8.28844e-20	0.470469	0.281	0.109	1.33908e-15	9	NDUFB3
GLRX2	2.28741e-15	0.466289	0.397	0.201	3.69554e-11	9	GLRX
MRPL52	1.86169e-23	0.464343	0.264	0.09	3.00775e-19	9	MRPL52
PSMA71	3.84253e-23	0.46251	0.553	0.267	6.20799e-19	9	PSMA7
RBM8A	1.35787e-20	0.460207	0.3	0.118	2.19378e-16	9	RBM8A
RPS72	2.25287e-28	0.45949	0.775	0.446	3.63974e-24	9	RPS7
HNRNPA11	6.0145e-24	0.458367	0.606	0.304	9.71703e-20	9	HNRNPA1
MIF3	1.60372e-09	0.456413	0.308	0.172	2.59097e-05	9	MIF
PSMA1	1.7155e-22	0.454836	0.297	0.109	2.77156e-18	9	PSMA1
RPL143	3.64787e-24	0.45338	0.769	0.466	5.8935e-20	9	RPL14
TMA71	5.89547e-21	0.44956	0.736	0.447	9.52472e-17	9	TMA7
LSM71	2.80176e-18	0.445733	0.325	0.138	4.52652e-14	9	LSM7
SNRPB2	1.11477e-17	0.444889	0.319	0.138	1.80102e-13	9	SNRPB2
SHFM12	1.67251e-16	0.441252	0.483	0.256	2.7021e-12	9	SHFM1
ATP5H2	1.58346e-18	0.441215	0.333	0.141	2.55823e-14	9	ATP5H
SUPT4H1	6.48288e-18	0.434784	0.269	0.107	1.04737e-13	9	SUPT4H1
DYNLL11	2.84114e-19	0.431332	0.444	0.207	4.59015e-15	9	DYNLL1
RPL43	2.41826e-22	0.430171	0.744	0.435	3.90694e-18	9	RPL4
RPS131	1.70159e-25	0.429859	0.878	0.613	2.74909e-21	9	RPS13
COPS9	2.40832e-17	0.428399	0.389	0.182	3.89089e-13	9	COPS9
ATP5B	6.51677e-15	0.425035	0.275	0.121	1.05285e-10	9	ATP5B
NACA1	2.19264e-22	0.418985	0.8	0.523	3.54243e-18	9	NACA
MRPL57	1.08444e-15	0.415887	0.283	0.123	1.75202e-11	9	MRPL57
ANP32B	6.83417e-19	0.41411	0.344	0.147	1.10413e-14	9	ANP32B
RPS52	4.03878e-22	0.410225	0.739	0.431	6.52505e-18	9	RPS5
NDUFA131	5.05628e-18	0.404323	0.325	0.138	8.16892e-14	9	NDUFA13
EEF1B22	5.33302e-18	0.404197	0.669	0.409	8.61602e-14	9	EEF1B2
PSMB31	1.13276e-14	0.401401	0.403	0.203	1.83009e-10	9	PSMB3
RPL232	4.24491e-20	0.400867	0.8	0.517	6.85808e-16	9	RPL23
ENY2	2.58946e-17	0.399213	0.314	0.135	4.18353e-13	9	ENY2
NDUFB13	2.75e-18	0.395985	0.594	0.309	4.4429e-14	9	NDUFB1
USMG52	2.19594e-14	0.394752	0.522	0.294	3.54776e-10	9	USMG5
SUMO2	2.18213e-17	0.393885	0.378	0.171	3.52545e-13	9	SUMO2
RPS231	1.6871e-32	0.391484	0.964	0.746	2.72567e-28	9	RPS23
UQCRB1	1.66408e-16	0.389234	0.531	0.291	2.68849e-12	9	UQCRB
NDUFB111	8.9508e-17	0.386981	0.339	0.151	1.44609e-12	9	NDUFB11
NDUFA121	3.64863e-15	0.386291	0.378	0.184	5.89473e-11	9	NDUFA12
GTF3A	5.44978e-15	0.379468	0.267	0.115	8.80467e-11	9	GTF3A
UBL5	1.46658e-15	0.37857	0.65	0.383	2.3694e-11	9	UBL5
RPS163	8.00185e-22	0.377565	0.881	0.63	1.29278e-17	9	RPS16
GHITM	1.35641e-14	0.37684	0.256	0.109	2.19142e-10	9	GHITM
RPL72	4.43683e-36	0.376421	0.975	0.852	7.16814e-32	9	RPL7
RPL83	2.97902e-23	0.37376	0.889	0.614	4.8129e-19	9	RPL8
RPL261	2.08488e-25	0.372515	0.897	0.646	3.36833e-21	9	RPL26
MT-CO2	1.53156e-26	0.370878	0.981	0.92	2.47438e-22	9	MT-CO2
COX7A21	1.8788e-17	0.36831	0.65	0.358	3.0354e-13	9	COX7A2
HNRNPA2B12	1.60165e-12	0.368138	0.425	0.233	2.58763e-08	9	HNRNPA2B1
COX7C2	3.17353e-15	0.360008	0.722	0.449	5.12716e-11	9	COX7C
S100A43	1.04659e-20	0.354887	0.756	0.455	1.69087e-16	9	S100A4
RPS62	5.87086e-37	0.354659	0.994	0.878	9.48497e-33	9	RPS6
CHCHD2	1.38418e-15	0.354132	0.514	0.27	2.23628e-11	9	CHCHD2
RPS182	8.11984e-31	0.342793	0.956	0.749	1.31184e-26	9	RPS18
NDUFB7	1.85751e-11	0.338306	0.267	0.128	3.00099e-07	9	NDUFB7
RPL7A3	7.42278e-15	0.336563	0.783	0.546	1.19922e-10	9	RPL7A
BTF31	1.04888e-16	0.335134	0.731	0.452	1.69457e-12	9	BTF3
RPS101	4.36309e-16	0.333089	0.672	0.39	7.04901e-12	9	RPS10
RPL292	1.00809e-18	0.324113	0.717	0.417	1.62867e-14	9	RPL29
RPS172	1.26576e-16	0.322487	0.894	0.699	2.04496e-12	9	RPS17
RPL36AL	9.45702e-12	0.31832	0.794	0.551	1.52788e-07	9	RPL36AL
HMGN2	1.24804e-11	0.315791	0.261	0.123	2.01633e-07	9	HMGN2
MT-ND11	1.90191e-13	0.313204	0.831	0.612	3.07273e-09	9	MT-ND1
EIF3K1	1.31159e-13	0.311602	0.372	0.184	2.119e-09	9	EIF3K
ROMO11	3.15967e-14	0.310217	0.519	0.277	5.10477e-10	9	ROMO1
NDUFA32	2.30827e-11	0.309282	0.464	0.264	3.72924e-07	9	NDUFA3
APRT	2.49644e-11	0.307041	0.303	0.152	4.03326e-07	9	APRT
SON2	1.445e-07	0.298694	0.456	0.294	0.00233455	9	SON
RPSA3	1.53732e-09	0.298323	0.581	0.382	2.48369e-05	9	RPSA
RPL37A2	7.37167e-18	0.294702	0.886	0.646	1.19097e-13	9	RPL37A
C19orf53	6.39106e-12	0.289384	0.269	0.127	1.03254e-07	9	C19orf53
H2AFV4	3.36942e-13	0.28575	0.422	0.214	5.44363e-09	9	H2AFV
COX8A2	2.95424e-10	0.285352	0.383	0.213	4.77288e-06	9	COX8A
TOMM72	8.57665e-12	0.281763	0.444	0.241	1.38564e-07	9	TOMM7
TPI12	1.73659e-13	0.280877	0.383	0.189	2.80564e-09	9	TPI1
SF3B5	1.42303e-09	0.278381	0.278	0.142	2.29905e-05	9	SF3B5
RPS242	7.27239e-15	0.273297	0.875	0.67	1.17493e-10	9	RPS24
NDUFC22	2.82905e-10	0.27285	0.358	0.19	4.57061e-06	9	NDUFC2
LAMTOR51	2.12759e-09	0.271416	0.356	0.197	3.43734e-05	9	LAMTOR5
RPS32	1.87155e-20	0.270242	0.956	0.778	3.02368e-16	9	RPS3
SNHG81	6.29426e-11	0.267655	0.272	0.13	1.0169e-06	9	SNHG8
RPL35A2	2.31549e-19	0.266977	0.947	0.735	3.7409e-15	9	RPL35A
MT-CO31	2.25687e-20	0.260221	0.994	0.965	3.64619e-16	9	MT-CO3
PSMB72	5.07272e-10	0.258401	0.344	0.185	8.19548e-06	9	PSMB7
RPL371	2.52121e-17	0.253695	0.878	0.627	4.07327e-13	9	RPL37
UBE2D3	2.19177e-09	0.253416	0.267	0.137	3.54102e-05	9	UBE2D3
NDUFB22	7.67527e-08	0.253308	0.458	0.292	0.00124002	9	NDUFB2
RPS202	2.13382e-13	0.250104	0.911	0.715	3.44739e-09	9	RPS20
MMP9	1.82205e-198	2.0271	0.464	0.049	2.9437e-194	10	MMP9		Neutrophil C_S100A12 high
S100A121	3.74438e-154	2.00858	0.969	0.639	6.04943e-150	10	S100A12
FCGR3B	9.05971e-128	1.67173	0.402	0.058	1.46369e-123	10	FCGR3B
FPR1	1.05012e-126	1.62677	0.348	0.043	1.69657e-122	10	FPR1
PGLYRP11	1.22255e-94	1.54741	0.601	0.19	1.97515e-90	10	PGLYRP1
PLBD1	2.96806e-102	1.48685	0.387	0.067	4.79519e-98	10	PLBD1
S100A92	1.9419e-174	1.47475	1	0.934	3.13733e-170	10	S100A9
CRISP31	3.80774e-69	1.46021	0.359	0.084	6.15179e-65	10	CRISP3
GCA2	3.45265e-108	1.45903	0.664	0.21	5.5781e-104	10	GCA
LTF1	1.5749e-59	1.4541	0.644	0.33	2.54441e-55	10	LTF
TFF3	1.78787e-62	1.40809	0.274	0.053	2.88848e-58	10	TFF3
MMP81	9.6219e-74	1.39559	0.484	0.141	1.55451e-69	10	MMP8
PADI41	2.87917e-90	1.38923	0.376	0.071	4.65159e-86	10	PADI4
S100A83	2.76446e-140	1.36382	1	0.953	4.46626e-136	10	S100A8
HP	7.0941e-86	1.34621	0.345	0.062	1.14612e-81	10	HP
IFITM22	3.07145e-54	1.34561	0.732	0.432	4.96224e-50	10	IFITM2
MCEMP1	2.93874e-91	1.33046	0.319	0.049	4.74783e-87	10	MCEMP1
LCN21	4.28166e-59	1.31764	0.61	0.277	6.91745e-55	10	LCN2
FCN12	4.31241e-84	1.31138	0.624	0.214	6.96714e-80	10	FCN1
CAMP1	1.0764e-38	1.28002	0.718	0.53	1.73903e-34	10	CAMP
QPCT	4.25209e-75	1.26683	0.276	0.045	6.86968e-71	10	QPCT
CYSTM11	1.0339e-57	1.25649	0.405	0.121	1.67037e-53	10	CYSTM1
ALOX5AP2	1.01066e-85	1.20161	0.729	0.315	1.63282e-81	10	ALOX5AP
FOLR32	2.20252e-47	1.16395	0.444	0.163	3.55839e-43	10	FOLR3
CLC	3.96458e-48	1.15366	0.311	0.084	6.40518e-44	10	CLC
FOS1	3.71032e-35	1.15305	0.319	0.11	5.9944e-31	10	FOS
S100A112	4.28498e-79	1.13015	0.823	0.463	6.92282e-75	10	S100A11
CDA1	4.10417e-56	1.12164	0.333	0.083	6.6307e-52	10	CDA
CSF3R	1.81825e-31	1.08013	0.308	0.111	2.93756e-27	10	CSF3R
FCER1G2	2.75258e-54	1.00062	0.57	0.234	4.44707e-50	10	FCER1G
MSRB1	6.44053e-39	0.99133	0.313	0.096	1.04053e-34	10	MSRB1
S100A63	2.04334e-74	0.988306	0.883	0.603	3.30122e-70	10	S100A6
MNDA3	1.07875e-51	0.969881	0.638	0.293	1.74284e-47	10	MNDA
RETN2	6.04029e-27	0.946133	0.422	0.204	9.75869e-23	10	RETN
SELL	3.35288e-28	0.93754	0.271	0.093	5.41691e-24	10	SELL
VIM2	1.20926e-43	0.926447	0.584	0.282	1.95369e-39	10	VIM
TYROBP2	1.12363e-43	0.919124	0.607	0.305	1.81534e-39	10	TYROBP
IFITM32	1.44559e-20	0.906797	0.39	0.207	2.3355e-16	10	IFITM3
ANXA32	3.86097e-36	0.899656	0.413	0.161	6.23779e-32	10	ANXA3
LTA4H	1.55539e-26	0.897291	0.251	0.085	2.51289e-22	10	LTA4H
S100P2	6.87933e-37	0.85403	0.519	0.237	1.11142e-32	10	S100P
LITAF1	1.52119e-18	0.828954	0.293	0.134	2.45764e-14	10	LITAF
LST13	2.22983e-21	0.772605	0.433	0.232	3.60251e-17	10	LST1
CARD161	2.91813e-21	0.744127	0.336	0.154	4.71454e-17	10	CARD16
TSPO1	2.567e-20	0.725085	0.456	0.263	4.14724e-16	10	TSPO
APMAP1	1.49998e-13	0.724891	0.256	0.128	2.42337e-09	10	APMAP
ARPC52	5.77058e-17	0.7098	0.413	0.242	9.32295e-13	10	ARPC5
EMB2	5.61908e-17	0.708726	0.316	0.156	9.07819e-13	10	EMB
MIR2232	2.79045e-19	0.705364	0.282	0.12	4.50825e-15	10	MIR223
CTSS1	5.7363e-14	0.703608	0.262	0.129	9.26757e-10	10	CTSS
RGL43	9.7428e-18	0.696321	0.313	0.149	1.57405e-13	10	RGL4
CAP12	9.53671e-20	0.691089	0.385	0.2	1.54075e-15	10	CAP1
ANP32A	5.84573e-15	0.677251	0.288	0.145	9.44436e-11	10	ANP32A
MYL12A3	1.02017e-26	0.657234	0.664	0.436	1.64819e-22	10	MYL12A
GMFG3	4.81284e-31	0.607158	0.758	0.533	7.77562e-27	10	GMFG
LCP12	1.07002e-12	0.606187	0.368	0.221	1.72872e-08	10	LCP1
ACTB3	4.62235e-38	0.605604	0.88	0.692	7.46787e-34	10	ACTB
CKLF1	5.12509e-10	0.569251	0.254	0.142	8.28009e-06	10	CKLF
ARPC21	4.19336e-16	0.548913	0.575	0.404	6.77479e-12	10	ARPC2
ANXA12	7.2474e-16	0.548015	0.578	0.419	1.17089e-11	10	ANXA1
MYL61	1.6099e-32	0.547891	0.88	0.742	2.60096e-28	10	MYL6
ITM2B2	2.30523e-06	0.533276	0.308	0.219	0.0372433	10	ITM2B
ITGB23	1.89251e-11	0.506375	0.322	0.184	3.05755e-07	10	ITGB2
TMSB4XP43	7.15561e-12	0.497426	0.55	0.395	1.15606e-07	10	TMSB4XP4
H3F3B1	4.32937e-10	0.472027	0.544	0.439	6.99452e-06	10	H3F3B
BLOC1S12	2.62466e-07	0.47165	0.288	0.186	0.0042404	10	BLOC1S1
TALDO12	2.26341e-08	0.469146	0.342	0.231	0.000365677	10	TALDO1
SNX3	4.63007e-08	0.467645	0.271	0.167	0.000748034	10	SNX3
MT-TV1	8.03709e-08	0.42091	0.282	0.169	0.00129847	10	MT-TV
LYZ3	4.29722e-17	0.41316	0.715	0.541	6.94258e-13	10	LYZ
PSAP2	4.09764e-06	0.402572	0.299	0.207	0.0662014	10	PSAP
DAZAP21	0.000649125	0.39985	0.282	0.218	1	10	DAZAP2
PFN12	3.35463e-10	0.372701	0.67	0.575	5.41974e-06	10	PFN1
MT-RNR21	2.90562e-28	0.366015	0.98	0.955	4.69433e-24	10	MT-RNR2
LAPTM51	4.7727e-08	0.365985	0.425	0.303	0.000771078	10	LAPTM5
GLRX3	8.66102e-05	0.365829	0.282	0.208	1	10	GLRX
RAC21	0.000327617	0.334718	0.268	0.199	1	10	RAC2
ARHGDIB	1.09232e-09	0.332948	0.704	0.582	1.76475e-05	10	ARHGDIB
TXN4	1.62043e-06	0.330316	0.578	0.483	0.0261796	10	TXN
C4orf31	0.00025151	0.327074	0.282	0.213	1	10	C4orf3
TMSB4X3	7.49139e-21	0.325658	0.989	0.939	1.21031e-16	10	TMSB4X
BPI2	6.85797e-07	0.286055	0.37	0.256	0.0110797	10	BPI
ARPC1B1	0.000555075	0.285907	0.305	0.235	1	10	ARPC1B
MALAT12	0.00462609	0.275873	0.37	0.316	1	10	MALAT1
PRR131	0.00196909	0.270544	0.268	0.203	1	10	PRR13
ACTG13	7.69675e-07	0.266052	0.63	0.521	0.0124349	10	ACTG1
HBM1	0	3.37291	0.951	0.098	0	11	HBM		Erythroid cell_HBM high
HBA21	9.34547e-133	3.28074	1	0.698	1.50985e-128	11	HBA2
HBA11	2.68841e-132	3.22537	1	0.66	4.34339e-128	11	HBA1
HBD1	1.07976e-168	3.12955	0.907	0.227	1.74446e-164	11	HBD
HBB2	1.43928e-129	2.94023	1	0.798	2.3253e-125	11	HBB
CA11	1.11666e-216	2.83654	0.82	0.115	1.80408e-212	11	CA1
HBG21	2.50011e-19	2.74821	0.278	0.098	4.03918e-15	11	HBG2
AHSP1	1.94748e-200	2.64114	0.985	0.23	3.14635e-196	11	AHSP
CA21	4.59703e-266	2.40585	0.61	0.041	7.42696e-262	11	CA2
GYPA1	0	2.39086	0.629	0.032	0	11	GYPA
GYPB1	0	2.38095	0.654	0.029	0	11	GYPB
PRDX21	9.11845e-172	2.26586	0.922	0.206	1.47318e-167	11	PRDX2
SLC4A1	1.25684e-215	2.15779	0.517	0.035	2.03054e-211	11	SLC4A1
BLVRB1	1.28501e-201	2.09693	0.883	0.141	2.07605e-197	11	BLVRB
ALAS2	7.63952e-285	2.05467	0.561	0.029	1.23424e-280	11	ALAS2
HEMGN	1.09249e-287	1.97088	0.473	0.018	1.76503e-283	11	HEMGN
IFI271	4.0018e-67	1.84602	0.351	0.056	6.46531e-63	11	IFI27
UROD1	2.42285e-103	1.66267	0.561	0.095	3.91436e-99	11	UROD
HMBS1	2.28557e-136	1.65893	0.42	0.038	3.69257e-132	11	HMBS
MGST32	7.95114e-85	1.56894	0.605	0.135	1.28459e-80	11	MGST3
CD361	5.93734e-97	1.52767	0.376	0.043	9.59236e-93	11	CD36
TFRC1	7.62807e-98	1.51193	0.4	0.049	1.23239e-93	11	TFRC
SLC25A37	2.63389e-90	1.50557	0.361	0.042	4.25532e-86	11	SLC25A37
RHAG	1.42941e-131	1.37888	0.273	0.015	2.30935e-127	11	RHAG
RHCE	6.38381e-210	1.3274	0.254	0.005	1.03137e-205	11	RHCE
MYL4	4.12792e-130	1.28522	0.254	0.012	6.66908e-126	11	MYL4
TMEM14B1	3.37711e-50	1.20759	0.395	0.087	5.45605e-46	11	TMEM14B
SLC25A39	6.38275e-62	1.20145	0.317	0.047	1.0312e-57	11	SLC25A39
SMIM1	5.55819e-70	1.20054	0.268	0.03	8.97981e-66	11	SMIM1
GYPC2	1.21625e-47	1.16038	0.507	0.145	1.96497e-43	11	GYPC
FTH13	3.59023e-67	1.10841	0.937	0.505	5.80037e-63	11	FTH1
PTTG11	7.36025e-39	1.07991	0.41	0.112	1.18912e-34	11	PTTG1
TMEM14C1	4.38118e-34	1.05303	0.298	0.07	7.07824e-30	11	TMEM14C
HMGB24	1.96171e-32	1.04884	0.595	0.26	3.16934e-28	11	HMGB2
KIAA01011	8.40183e-28	0.94846	0.371	0.117	1.3574e-23	11	KIAA0101
BSG	6.61459e-26	0.893162	0.361	0.114	1.06865e-21	11	BSG
TUBA1B2	6.61039e-31	0.884326	0.668	0.337	1.06797e-26	11	TUBA1B
NME41	1.19002e-27	0.822123	0.268	0.065	1.92259e-23	11	NME4
ATPIF11	3.25464e-24	0.785592	0.61	0.303	5.2582e-20	11	ATPIF1
TUBB1	3.73466e-22	0.748992	0.478	0.2	6.03372e-18	11	TUBB
SRI1	2.92855e-19	0.74717	0.346	0.128	4.73136e-15	11	SRI
MPC21	1.41723e-16	0.710895	0.302	0.11	2.28968e-12	11	MPC2
RPA31	5.7816e-13	0.691255	0.298	0.125	9.34075e-09	11	RPA3
NDUFA61	3.69516e-14	0.653421	0.322	0.132	5.9699e-10	11	NDUFA6
RBX11	1.03761e-12	0.626044	0.478	0.255	1.67636e-08	11	RBX1
CKS21	4.16835e-12	0.609925	0.283	0.119	6.73439e-08	11	CKS2
UCP2	4.99695e-11	0.584366	0.278	0.12	8.07308e-07	11	UCP2
AP2S1	2.18146e-10	0.515881	0.268	0.116	3.52437e-06	11	AP2S1
YBX11	8.93828e-09	0.479273	0.356	0.191	0.000144407	11	YBX1
ANP32B1	2.82587e-08	0.474658	0.302	0.153	0.000456548	11	ANP32B
CALM22	6.78231e-06	0.450142	0.546	0.416	0.109575	11	CALM2
HSP90AA14	2.29871e-05	0.449591	0.366	0.231	0.371379	11	HSP90AA1
UBB1	3.90297e-13	0.428562	0.82	0.59	6.30564e-09	11	UBB
CAT2	3.19043e-07	0.427575	0.341	0.19	0.00515447	11	CAT
EIF2S22	3.47817e-07	0.42625	0.341	0.189	0.00561933	11	EIF2S2
GUK1	1.82009e-07	0.422806	0.263	0.13	0.00294053	11	GUK1
NDUFB41	2.29158e-06	0.419979	0.278	0.153	0.0370227	11	NDUFB4
SOD11	1.07425e-07	0.394435	0.312	0.164	0.00173555	11	SOD1
NDUFC11	7.91697e-06	0.3836	0.273	0.151	0.127907	11	NDUFC1
HMGB13	3.41389e-07	0.378762	0.507	0.32	0.00551548	11	HMGB1
RAN3	7.31981e-07	0.376498	0.449	0.273	0.0118259	11	RAN
ANAPC112	4.22767e-05	0.357497	0.327	0.2	0.683023	11	ANAPC11
TCEB22	8.02978e-05	0.346672	0.502	0.365	1	11	TCEB2
SRSF71	6.62611e-05	0.33212	0.273	0.158	1	11	SRSF7
NDUFA21	0.000477174	0.323072	0.254	0.159	1	11	NDUFA2
TIMM8B2	0.000545433	0.313476	0.263	0.165	1	11	TIMM8B
PSMB61	0.000967381	0.301034	0.263	0.171	1	11	PSMB6
POMP2	0.000204701	0.297572	0.351	0.231	1	11	POMP
SNRPG3	8.15365e-05	0.276355	0.444	0.296	1	11	SNRPG
NDUFB61	0.000514164	0.269422	0.283	0.177	1	11	NDUFB6
VPS293	0.00199878	0.255955	0.298	0.201	1	11	VPS29
GNLY2	1.43336e-115	1.88847	0.828	0.219	2.31574e-111	12	GNLY		T cell_GNLY high
FGFBP2	2.55597e-147	1.82697	0.466	0.044	4.12942e-143	12	FGFBP2
GZMB2	7.66913e-126	1.80536	0.721	0.138	1.23902e-121	12	GZMB
FCGR3A	6.54925e-133	1.79094	0.51	0.06	1.0581e-128	12	FCGR3A
GZMH2	1.91068e-114	1.66089	0.667	0.125	3.0869e-110	12	GZMH
CCL4	4.05121e-89	1.64215	0.392	0.051	6.54514e-85	12	CCL4
CCL52	6.09885e-129	1.62062	0.98	0.287	9.85331e-125	12	CCL5
CX3CR1	2.55085e-102	1.52802	0.353	0.036	4.12115e-98	12	CX3CR1
CTSW	4.70759e-64	1.461	0.363	0.061	7.60559e-60	12	CTSW
GZMA2	5.76911e-96	1.4133	0.681	0.147	9.32057e-92	12	GZMA
KLRD1	1.04694e-57	1.37352	0.324	0.053	1.69144e-53	12	KLRD1
TRGC2	9.37041e-44	1.36803	0.255	0.043	1.51388e-39	12	TRGC2
PRF1	1.07431e-52	1.30136	0.304	0.051	1.73566e-48	12	PRF1
ARL4C	1.11663e-40	1.28503	0.294	0.06	1.80402e-36	12	ARL4C
CD3D2	1.31174e-60	1.26926	0.51	0.121	2.11925e-56	12	CD3D
NKG72	6.60108e-69	1.209	0.907	0.466	1.06647e-64	12	NKG7
CD247	2.65237e-45	1.20288	0.275	0.048	4.28518e-41	12	CD247
TRBC12	3.59568e-54	1.19624	0.5	0.126	5.80917e-50	12	TRBC1
IL322	1.88104e-48	1.17789	0.525	0.151	3.039e-44	12	IL32
GIMAP71	4.98551e-40	1.16479	0.363	0.089	8.05459e-36	12	GIMAP7
CD522	1.4791e-69	1.14312	0.824	0.282	2.38963e-65	12	CD52
APOBEC3G	1.6179e-38	1.12107	0.26	0.049	2.61388e-34	12	APOBEC3G
EVL	1.14856e-35	1.12057	0.294	0.066	1.85562e-31	12	EVL
IFITM12	1.88748e-43	1.112	0.475	0.134	3.0494e-39	12	IFITM1
C12orf75	1.4511e-39	1.10425	0.27	0.051	2.3444e-35	12	C12orf75
TXNIP1	1.83513e-36	1.098	0.475	0.155	2.96484e-32	12	TXNIP
TRAC2	1.78986e-36	1.09072	0.466	0.15	2.89169e-32	12	TRAC
S100A102	5.13347e-33	1.07669	0.426	0.135	8.29363e-29	12	S100A10
ID2	1.42459e-24	1.06819	0.309	0.097	2.30156e-20	12	ID2
TRBC22	9.93989e-44	1.04944	0.588	0.199	1.60589e-39	12	TRBC2
GIMAP4	2.30695e-31	1.04153	0.265	0.06	3.72711e-27	12	GIMAP4
RARRES3	1.50348e-23	0.988973	0.275	0.079	2.42902e-19	12	RARRES3
HLA-C2	2.74939e-50	0.980433	0.873	0.472	4.44192e-46	12	HLA-C
APOBEC3C	1.09573e-25	0.962894	0.265	0.07	1.77026e-21	12	APOBEC3C
SLC9A3R1	2.85235e-24	0.949985	0.265	0.072	4.60826e-20	12	SLC9A3R1
PCED1B-AS1	7.01045e-21	0.941221	0.299	0.1	1.13261e-16	12	PCED1B-AS1
CORO1A2	6.86455e-30	0.931455	0.451	0.158	1.10904e-25	12	CORO1A
S100A44	1.70788e-37	0.902137	0.819	0.46	2.75925e-33	12	S100A4
CD991	2.11414e-17	0.874561	0.319	0.125	3.41561e-13	12	CD99
HLA-B2	2.78246e-49	0.865857	0.926	0.609	4.49535e-45	12	HLA-B
HLA-A2	8.74038e-41	0.85204	0.848	0.46	1.4121e-36	12	HLA-A
UCP21	2.87879e-19	0.839867	0.324	0.118	4.65097e-15	12	UCP2
HOPX	1.86446e-20	0.834812	0.26	0.078	3.01222e-16	12	HOPX
MT2A	1.03514e-18	0.827577	0.275	0.092	1.67237e-14	12	MT2A
IL2RG2	3.46747e-19	0.827451	0.392	0.167	5.60204e-15	12	IL2RG
PLEK	1.87928e-15	0.818992	0.27	0.102	3.03617e-11	12	PLEK
DDX52	3.07984e-18	0.818725	0.48	0.25	4.97578e-14	12	DDX5
ANXA21	1.71508e-18	0.800385	0.279	0.095	2.77089e-14	12	ANXA2
ARHGDIA	1.17807e-14	0.799286	0.255	0.095	1.90329e-10	12	ARHGDIA
HLA-E2	1.64524e-24	0.798806	0.569	0.277	2.65805e-20	12	HLA-E
ITGB24	1.8397e-18	0.790694	0.417	0.184	2.97222e-14	12	ITGB2
PPP1CA	5.55145e-17	0.776109	0.343	0.14	8.96893e-13	12	PPP1CA
LSP1	5.94789e-14	0.775991	0.26	0.1	9.60941e-10	12	LSP1
HCST2	2.14382e-20	0.77082	0.569	0.299	3.46356e-16	12	HCST
PSMB93	2.54015e-16	0.734148	0.397	0.181	4.10386e-12	12	PSMB9
CALM12	9.19261e-20	0.721	0.657	0.415	1.48516e-15	12	CALM1
TAGLN21	9.7309e-10	0.712956	0.299	0.151	1.57212e-05	12	TAGLN2
CD532	1.02124e-10	0.69939	0.299	0.143	1.64991e-06	12	CD53
CLIC12	7.55619e-15	0.695296	0.422	0.212	1.22078e-10	12	CLIC1
EMP32	4.96831e-16	0.68253	0.412	0.191	8.0268e-12	12	EMP3
LGALS11	3.2098e-21	0.67696	0.52	0.241	5.18576e-17	12	LGALS1
TMSB103	1.62319e-42	0.653604	0.98	0.808	2.62243e-38	12	TMSB10
EEF1D2	7.88168e-14	0.640959	0.525	0.308	1.27336e-09	12	EEF1D
HLA-DRB11	3.3919e-12	0.626786	0.26	0.106	5.47996e-08	12	HLA-DRB1
LITAF2	2.22618e-08	0.625612	0.27	0.138	0.000359661	12	LITAF
CFL12	1.11301e-20	0.615804	0.819	0.579	1.79817e-16	12	CFL1
HSPA82	2.4032e-10	0.605114	0.363	0.197	3.88261e-06	12	HSPA8
MT-ND53	2.91476e-12	0.603673	0.564	0.37	4.70909e-08	12	MT-ND5
ARL6IP5	7.40009e-09	0.601594	0.265	0.131	0.000119556	12	ARL6IP5
PSME12	1.00032e-08	0.596009	0.377	0.228	0.000161612	12	PSME1
UBC2	1.9472e-10	0.593872	0.475	0.299	3.1459e-06	12	UBC
SH3BGRL34	4.45384e-23	0.588174	0.819	0.566	7.19562e-19	12	SH3BGRL3
PCBP12	2.88031e-09	0.564866	0.382	0.221	4.65343e-05	12	PCBP1
ACTB4	2.99166e-22	0.561629	0.907	0.696	4.83332e-18	12	ACTB
RAC22	8.97178e-07	0.545721	0.324	0.198	0.0144948	12	RAC2
IFITM23	2.64282e-19	0.533815	0.691	0.44	4.26973e-15	12	IFITM2
ACTG14	2.04074e-12	0.517332	0.711	0.52	3.29703e-08	12	ACTG1
ITM2B3	3.58015e-07	0.511056	0.358	0.219	0.0057841	12	ITM2B
APRT1	1.67535e-06	0.497376	0.275	0.157	0.027067	12	APRT
RPS273	1.58987e-32	0.469308	1	0.938	2.5686e-28	12	RPS27
B2M3	3.93787e-47	0.466842	1	0.99	6.36202e-43	12	B2M
HNRNPK1	0.000294081	0.466165	0.324	0.237	1	12	HNRNPK
RPL63	2.94953e-14	0.458864	0.74	0.534	4.76525e-10	12	RPL6
ARPC22	2.58872e-08	0.457778	0.559	0.409	0.000418234	12	ARPC2
YWHAB2	7.33359e-05	0.445916	0.387	0.289	1	12	YWHAB
RPL103	1.27565e-20	0.436083	0.926	0.744	2.06094e-16	12	RPL10
CD743	1.98625e-15	0.43599	0.574	0.316	3.20898e-11	12	CD74
UBA523	1.21374e-10	0.428884	0.725	0.59	1.96092e-06	12	UBA52
MYL12A4	1.90957e-09	0.424827	0.623	0.443	3.08509e-05	12	MYL12A
RPL312	2.44438e-17	0.423718	0.922	0.701	3.94914e-13	12	RPL3
LAPTM52	6.36556e-07	0.419521	0.451	0.305	0.0102842	12	LAPTM5
RPS15A3	8.19126e-16	0.417036	0.868	0.665	1.32338e-11	12	RPS15A
PFN13	3.16647e-09	0.403606	0.721	0.575	5.11575e-05	12	PFN1
RPS283	9.90562e-11	0.402163	0.735	0.527	1.60035e-06	12	RPS28
RPL283	1.95316e-13	0.401308	0.824	0.649	3.15552e-09	12	RPL28
RPS292	1.50589e-21	0.400416	0.98	0.816	2.43292e-17	12	RPS29
RPS153	2.79376e-18	0.388525	0.936	0.733	4.5136e-14	12	RPS15
EDF12	0.000937124	0.379603	0.289	0.207	1	12	EDF1
FAU3	9.47075e-09	0.379378	0.721	0.581	0.000153009	12	FAU
RPL13A3	7.10139e-14	0.378633	0.902	0.701	1.1473e-09	12	RPL13A
RPLP23	1.57908e-13	0.363494	0.912	0.774	2.55116e-09	12	RPLP2
PPIA2	2.78293e-06	0.361638	0.559	0.408	0.0449611	12	PPIA
EIF12	1.65995e-07	0.358871	0.667	0.519	0.00268181	12	EIF1
RPL213	5.47422e-18	0.357182	0.985	0.875	8.84416e-14	12	RPL21
RPS164	7.87855e-12	0.351685	0.843	0.637	1.27286e-07	12	RPS16
MIF4	0.00107036	0.345876	0.26	0.177	1	12	MIF
H3F3B2	1.26513e-07	0.344576	0.603	0.439	0.00204395	12	H3F3B
PSME22	0.00570207	0.325683	0.294	0.225	1	12	PSME2
EIF3K2	0.00666321	0.323448	0.26	0.192	1	12	EIF3K
RPL243	1.47464e-06	0.312835	0.637	0.496	0.0238242	12	RPL24
MYL12B1	0.000201471	0.31212	0.426	0.32	1	12	MYL12B
RPL133	8.71631e-15	0.300075	0.946	0.769	1.40821e-10	12	RPL13
RPS27A3	1.10483e-12	0.298729	0.951	0.822	1.78496e-08	12	RPS27A
CST72	2.80017e-14	0.29831	0.75	0.457	4.52396e-10	12	CST7
RPS123	9.07144e-14	0.295703	0.931	0.742	1.46558e-09	12	RPS12
MT-CO12	1.39143e-18	0.292483	1	0.965	2.24799e-14	12	MT-CO1
RPS33	6.89922e-12	0.282266	0.936	0.783	1.11464e-07	12	RPS3
IGHA22	2.57144e-21	0.279585	0.426	0.171	4.15442e-17	12	IGHA2
TMSB4X4	1.20293e-14	0.279431	1	0.939	1.94346e-10	12	TMSB4X
RPSA4	0.00249582	0.276827	0.495	0.39	1	12	RPSA
RPL192	1.3534e-08	0.273957	0.873	0.712	0.000218656	12	RPL19
RPL183	1.32871e-06	0.267701	0.711	0.548	0.0214667	12	RPL18
SRP141	0.00146894	0.263011	0.49	0.402	1	12	SRP14
RPL144	6.55806e-05	0.255796	0.603	0.479	1	12	RPL14
EEF1A12	2.4091e-08	0.253828	0.902	0.787	0.000389213	12	EEF1A1
RACK13	0.000271287	0.252957	0.632	0.516	1	12	RACK1
GZMB3	6.92612e-16	1.4354	0.451	0.152	1.11898e-11	13	GZMB		T cell_GZMB high
GNLY3	5.41075e-19	1.2151	0.604	0.233	8.74161e-15	13	GNLY
GZMA3	4.08583e-16	1.17597	0.462	0.159	6.60106e-12	13	GZMA
RP11-761N21.21	2.30372e-14	1.1473	0.538	0.241	3.72189e-10	13	RP11-761N21.2
MT-TL11	1.41637e-09	1.04566	0.352	0.142	2.28829e-05	13	MT-TL1
RPL10P91	1.00435e-14	1.03992	0.374	0.116	1.62263e-10	13	RPL10P9
AC090498.11	2.61564e-13	1.01234	0.451	0.172	4.22583e-09	13	AC090498.1
IL323	5.47259e-21	0.997174	0.527	0.157	8.84152e-17	13	IL32
RP11-343H5.41	7.48102e-14	0.983024	0.495	0.196	1.20863e-09	13	RP11-343H5.4
RP11-889L3.11	9.13634e-12	0.981283	0.308	0.096	1.47607e-07	13	RP11-889L3.1
RPS18P121	5.03091e-12	0.957916	0.297	0.088	8.12794e-08	13	RPS18P12
RP11-543P15.12	5.1031e-12	0.955407	0.692	0.393	8.24456e-08	13	RP11-543P15.1
RP11-234A1.11	3.8193e-14	0.954987	0.571	0.249	6.17046e-10	13	RP11-234A1.1
RPS2P51	2.21957e-09	0.951485	0.374	0.157	3.58594e-05	13	RPS2P5
HSPE12	0.000137376	0.951148	0.341	0.201	1	13	HSPE1
RPL10P161	2.52262e-07	0.949652	0.297	0.128	0.00407554	13	RPL10P16
RP11-422P24.91	1.54632e-09	0.940153	0.264	0.088	2.49823e-05	13	RP11-422P24.9
CD21	1.5727e-13	0.934891	0.275	0.071	2.54085e-09	13	CD2
RPL7P11	3.50799e-09	0.93292	0.418	0.193	5.66751e-05	13	RPL7P1
RP5-1056L3.31	4.45247e-11	0.927048	0.341	0.12	7.19341e-07	13	RP5-1056L3.3
MT-TV2	1.40444e-10	0.917161	0.418	0.172	2.26901e-06	13	MT-TV
RPL13P121	2.05172e-11	0.916117	0.604	0.321	3.31476e-07	13	RPL13P12
MT-TW1	1.14211e-10	0.906117	0.549	0.266	1.84519e-06	13	MT-TW
RPL34P181	3.57342e-09	0.895065	0.33	0.131	5.77321e-05	13	RPL34P18
RPS3AP61	2.67683e-11	0.894152	0.484	0.221	4.32469e-07	13	RPS3AP6
RP11-112J1.11	3.06696e-06	0.882849	0.264	0.114	0.0495499	13	RP11-112J1.1
MT2A1	1.96393e-08	0.882627	0.275	0.095	0.000317293	13	MT2A
AC004453.81	2.38451e-11	0.872924	0.396	0.152	3.85241e-07	13	AC004453.8
S100A103	1.73337e-10	0.867774	0.374	0.141	2.80043e-06	13	S100A10
RP11-475C16.11	4.60162e-09	0.858161	0.473	0.238	7.43437e-05	13	RP11-475C16.1
CD3D3	3.87097e-11	0.850333	0.363	0.13	6.25394e-07	13	CD3D
RPL10AP61	5.46924e-06	0.838233	0.308	0.152	0.088361	13	RPL10AP6
RPS7P11	2.7425e-09	0.837677	0.319	0.12	4.43078e-05	13	RPS7P1
GIMAP72	6.48748e-10	0.832849	0.286	0.095	1.04812e-05	13	GIMAP7
CD44	1.03694e-08	0.829417	0.253	0.086	0.000167528	13	CD44
RPL26P191	1.08109e-06	0.825605	0.275	0.118	0.0174661	13	RPL26P19
RP11-864N7.21	5.76037e-07	0.823202	0.363	0.178	0.00930645	13	RP11-864N7.2
RPL13AP52	2.40229e-12	0.808701	0.505	0.216	3.88115e-08	13	RPL13AP5
CD523	4.42378e-12	0.803227	0.626	0.294	7.14706e-08	13	CD52
RP11-778D9.41	9.84677e-09	0.801799	0.264	0.09	0.000159084	13	RP11-778D9.4
RP11-92K2.21	1.1215e-09	0.798899	0.385	0.157	1.8119e-05	13	RP11-92K2.2
SC22CB-1E7.11	5.40637e-09	0.79639	0.264	0.089	8.73454e-05	13	SC22CB-1E7.1
RPS2P461	1.60599e-08	0.792872	0.473	0.25	0.000259463	13	RPS2P46
RP4-765C7.22	2.65477e-07	0.787549	0.451	0.238	0.00428905	13	RP4-765C7.2
RPS15AP11	1.22545e-05	0.7851	0.253	0.113	0.197984	13	RPS15AP1
RPS23P81	1.969e-06	0.782862	0.308	0.143	0.0318112	13	RPS23P8
RPL39P31	1.39477e-07	0.780737	0.275	0.109	0.00225338	13	RPL39P3
AC007969.51	3.26148e-07	0.775998	0.44	0.232	0.00526925	13	AC007969.5
MTATP6P12	6.16855e-10	0.773944	0.549	0.27	9.9659e-06	13	MTATP6P1
PCED1B-AS11	2.72392e-08	0.770389	0.286	0.104	0.000440077	13	PCED1B-AS1
RPS27AP161	5.07926e-09	0.765993	0.418	0.187	8.20606e-05	13	RPS27AP16
MT-TP1	8.5567e-06	0.735509	0.319	0.156	0.138242	13	MT-TP
RPS3AP261	1.86971e-06	0.732917	0.429	0.247	0.0302071	13	RPS3AP26
MT-ATP81	4.22034e-08	0.730055	0.286	0.11	0.000681839	13	MT-ATP8
RP11-466H18.11	1.56359e-07	0.727132	0.473	0.255	0.00252613	13	RP11-466H18.1
RPL15P31	1.93606e-08	0.725891	0.418	0.197	0.00031279	13	RPL15P3
RPL412	3.8145e-11	0.721021	0.835	0.589	6.1627e-07	13	RPL41
LGALS12	0.000203013	0.720715	0.407	0.248	1	13	LGALS1
RP5-827C21.11	2.40663e-06	0.701553	0.253	0.104	0.0388816	13	RP5-827C21.1
RP11-632C17--A.11	0.000548329	0.699808	0.275	0.157	1	13	RP11-632C17--A.1
RPL13AP251	0.000467361	0.699445	0.297	0.174	1	13	RPL13AP25
DBI2	2.48269e-05	0.698718	0.374	0.216	0.401103	13	DBI
RPL7P91	1.83918e-06	0.693976	0.473	0.273	0.0297137	13	RPL7P9
MTCO1P121	2.08306e-07	0.688543	0.407	0.2	0.0033654	13	MTCO1P12
TRBC23	8.4146e-11	0.686529	0.495	0.207	1.35946e-06	13	TRBC2
MT-ND4L1	4.44216e-08	0.680878	0.44	0.213	0.000717676	13	MT-ND4L
TRAC3	2.09792e-08	0.673481	0.374	0.157	0.000338939	13	TRAC
RPL18AP31	1.19005e-05	0.662351	0.462	0.285	0.192265	13	RPL18AP3
MT-RNR11	2.96993e-05	0.658881	0.747	0.631	0.479822	13	MT-RNR1
RP11-371A22.11	2.26748e-05	0.650112	0.319	0.162	0.366334	13	RP11-371A22.1
RPL23A2	3.70401e-09	0.64975	0.747	0.542	5.9842e-05	13	RPL23A
RP11-572P18.11	0.000302382	0.625196	0.308	0.175	1	13	RP11-572P18.1
GZMH3	0.000175135	0.624587	0.275	0.14	1	13	GZMH
HLA-DRB12	7.6897e-07	0.615654	0.275	0.109	0.0124235	13	HLA-DRB1
TRBC13	4.222e-05	0.61416	0.286	0.136	0.682107	13	TRBC1
PSMA21	0.000586176	0.612425	0.275	0.153	1	13	PSMA2
RPL9P92	1.98171e-05	0.609094	0.538	0.364	0.320164	13	RPL9P9
IFITM13	0.000151554	0.608702	0.275	0.143	1	13	IFITM1
MT-RNR22	8.67088e-05	0.588512	0.967	0.956	1	13	MT-RNR2
RP11-425L10.11	4.50767e-05	0.585461	0.308	0.152	0.728259	13	RP11-425L10.1
RPL372	3.80955e-08	0.55649	0.78	0.639	0.000615471	13	RPL37
RPL391	2.22311e-07	0.551096	0.802	0.629	0.00359166	13	RPL39
SOD12	0.000737994	0.550616	0.297	0.167	1	13	SOD1
RPS27L1	0.00734012	0.545794	0.385	0.293	1	13	RPS27L
TMSB104	1.72464e-09	0.537728	0.923	0.812	2.78633e-05	13	TMSB10
SH3BGRL35	2.23822e-08	0.53606	0.78	0.571	0.000361606	13	SH3BGRL3
NPM12	9.33185e-05	0.534267	0.462	0.294	1	13	NPM1
IFITM24	8.64607e-06	0.532897	0.637	0.445	0.139686	13	IFITM2
TMA72	4.32278e-06	0.524047	0.626	0.461	0.0698389	13	TMA7
PSMB11	0.00845759	0.523301	0.319	0.209	1	13	PSMB1
SNRPG4	0.00243735	0.523197	0.407	0.299	1	13	SNRPG
CCL53	1.07168e-09	0.509466	0.637	0.305	1.73141e-05	13	CCL5
RPL3P42	0.000811465	0.503372	0.396	0.266	1	13	RPL3P4
RPS183	1.13437e-09	0.500624	0.945	0.758	1.83268e-05	13	RPS18
HNRNPC1	0.00604737	0.498036	0.297	0.188	1	13	HNRNPC
AC016739.21	0.00162315	0.497789	0.275	0.158	1	13	AC016739.2
RPS274	6.58217e-11	0.489665	1	0.939	1.06342e-06	13	RPS27
IL2RG3	0.000114538	0.483622	0.33	0.172	1	13	IL2RG
CFL13	3.34872e-06	0.480578	0.747	0.584	0.0541019	13	CFL1
RPL244	0.000231336	0.474198	0.615	0.498	1	13	RPL24
RPS293	1.02261e-06	0.469529	0.934	0.819	0.0165212	13	RPS29
RPS73	0.000261808	0.468835	0.604	0.462	1	13	RPS7
S100A45	1.47846e-05	0.460566	0.67	0.468	0.238859	13	S100A4
HINT11	1.54215e-05	0.457379	0.615	0.414	0.249149	13	HINT1
RPS252	4.37264e-06	0.449384	0.813	0.687	0.0706444	13	RPS25
MYL12A5	0.000252142	0.439853	0.615	0.446	1	13	MYL12A
RPL262	2.1672e-06	0.438803	0.835	0.658	0.0350133	13	RPL26
RPL13A4	1.23829e-06	0.435355	0.901	0.705	0.0200058	13	RPL13A
RPL36A1	7.05621e-05	0.428085	0.736	0.624	1	13	RPL36A
RPL35A3	3.86303e-07	0.418441	0.857	0.746	0.00624111	13	RPL35A
ATP5L2	0.00244654	0.417454	0.626	0.503	1	13	ATP5L
RPS102	0.000148039	0.417439	0.571	0.403	1	13	RPS10
RPL313	1.38421e-06	0.414164	0.945	0.852	0.0223633	13	RPL31
RPL134	6.314e-05	0.40854	0.835	0.773	1	13	RPL13
RPL10A3	0.0018627	0.404506	0.626	0.473	1	13	RPL10A
RPS212	0.000323266	0.401702	0.725	0.629	1	13	RPS2
NKG73	0.000100548	0.39936	0.637	0.477	1	13	NKG7
COX6C3	0.00415245	0.392246	0.451	0.343	1	13	COX6C
RPL362	2.20626e-06	0.392028	0.901	0.732	0.0356444	13	RPL36
ZFAS11	0.00358025	0.387418	0.33	0.211	1	13	ZFAS1
MT-ND54	0.000836839	0.386279	0.516	0.374	1	13	MT-ND5
RPL18A2	0.000545247	0.3778	0.78	0.657	1	13	RPL18A
RPS154	3.36489e-05	0.375921	0.857	0.738	0.543631	13	RPS15
RPL145	0.00256218	0.375432	0.626	0.481	1	13	RPL14
RPS34	1.76713e-05	0.372336	0.945	0.786	0.285498	13	RPS3
RPS3A3	0.000112945	0.365587	0.901	0.789	1	13	RPS3A
RPS132	0.000143434	0.364573	0.769	0.625	1	13	RPS13
RPL104	1.07991e-05	0.361894	0.846	0.748	0.17447	13	RPL10
MT-ND41	6.45578e-07	0.354505	0.967	0.905	0.01043	13	MT-ND4
RPL352	0.000167967	0.353157	0.824	0.696	1	13	RPL35
RPS191	3.70366e-08	0.340014	0.978	0.922	0.000598363	13	RPS19
RPS284	0.00337199	0.339113	0.67	0.532	1	13	RPS28
RPL303	0.00101948	0.335442	0.835	0.735	1	13	RPL30
RPL193	0.000500762	0.326957	0.824	0.716	1	13	RPL19
RPL184	0.00197252	0.322114	0.67	0.552	1	13	RPL18
RPL214	4.53362e-05	0.319268	0.934	0.878	0.732452	13	RPL21
MT-CO32	1.1691e-07	0.312001	1	0.966	0.00188881	13	MT-CO3
RPS4X3	0.00545825	0.311025	0.824	0.716	1	13	RPS4X
RPL272	0.0016372	0.308556	0.714	0.648	1	13	RPL27
COMMD61	0.00284463	0.301991	0.571	0.416	1	13	COMMD6
RPS213	0.00491212	0.299848	0.703	0.611	1	13	RPS21
RPL37A3	0.000402305	0.296371	0.791	0.657	1	13	RPL37A
RPL323	0.00014205	0.296085	0.912	0.824	1	13	RPL32
RPL27A2	0.00260133	0.292695	0.89	0.842	1	13	RPL27A
BTF32	0.000712616	0.290435	0.615	0.465	1	13	BTF3
RPS232	0.00289534	0.289678	0.868	0.757	1	13	RPS23
RPL233	0.00775308	0.287518	0.626	0.531	1	13	RPL23
RPLP12	0.00115794	0.279472	0.901	0.853	1	13	RPLP1
RPS141	9.26686e-06	0.279238	1	0.96	0.149715	13	RPS14
RPS27A4	0.000354935	0.278172	0.923	0.825	1	13	RPS27A
RPL92	0.00364831	0.275091	0.791	0.649	1	13	RPL9
RPS165	0.000373651	0.272257	0.791	0.641	1	13	RPS16
MT-ATP61	2.29689e-05	0.270597	1	0.918	0.371085	13	MT-ATP6
RPL284	0.00286337	0.270525	0.736	0.653	1	13	RPL28
MT-CO13	3.18657e-05	0.257331	0.978	0.966	0.514822	13	MT-CO1
RPL73	0.00012205	0.251788	0.945	0.858	1	13	RPL7
MS4A1	0	2.51297	0.569	0.008	0	14	MS4A1		Promonocyte
CD744	1.76746e-55	2.39375	0.985	0.317	2.85551e-51	14	CD74
HLA-DRA1	1.74653e-89	2.3917	0.862	0.111	2.8217e-85	14	HLA-DRA
HLA-DRB13	1.54477e-68	2.18768	0.754	0.104	2.49573e-64	14	HLA-DRB1
CD79A	5.47214e-94	2.14211	0.446	0.024	8.84079e-90	14	CD79A
LTB2	7.04019e-42	1.93053	0.646	0.118	1.13741e-37	14	LTB
HLA-DPA1	3.21503e-68	1.91655	0.6	0.063	5.19421e-64	14	HLA-DPA1
HLA-DQB1	5.97527e-130	1.86365	0.4	0.013	9.65365e-126	14	HLA-DQB1
HLA-DPB1	8.23638e-23	1.47414	0.338	0.056	1.33067e-18	14	HLA-DPB1
CD524	4.40796e-22	1.23269	0.785	0.294	7.1215e-18	14	CD52
CD533	1.00025e-14	1.17265	0.477	0.145	1.616e-10	14	CD53
CD37	2.21658e-13	1.15184	0.415	0.123	3.58111e-09	14	CD37
IGHM1	2.46913e-19	0.968618	0.4	0.09	3.98912e-15	14	IGHM
GPSM3	2.19893e-09	0.953544	0.308	0.093	3.55259e-05	14	GPSM3
CIRBP	4.80912e-08	0.875682	0.277	0.086	0.000776961	14	CIRBP
CORO1A3	7.15689e-08	0.817951	0.415	0.165	0.00115627	14	CORO1A
ANAPC161	1.99101e-06	0.778325	0.4	0.181	0.0321668	14	ANAPC16
RPL13A5	2.74303e-16	0.762021	0.954	0.705	4.43164e-12	14	RPL13A
LIMD2	2.27377e-07	0.761542	0.292	0.096	0.00367351	14	LIMD2
HLA-E3	3.08518e-05	0.716931	0.508	0.284	0.498441	14	HLA-E
TRBC24	4.80514e-08	0.716646	0.492	0.209	0.000776318	14	TRBC2
RPS166	3.22742e-11	0.695992	0.877	0.641	5.21422e-07	14	RPS16
BTG1	5.4323e-05	0.690432	0.323	0.146	0.877642	14	BTG1
RPL314	1.04394e-10	0.686064	0.923	0.706	1.68658e-06	14	RPL3
TRBC14	9.13773e-05	0.676846	0.308	0.136	1	14	TRBC1
EIF3H	0.000767526	0.663828	0.277	0.14	1	14	EIF3H
TAGLN22	2.7609e-05	0.658258	0.338	0.154	0.44605	14	TAGLN2
LAPTM53	4.61157e-06	0.620578	0.554	0.307	0.0745046	14	LAPTM5
RPL64	6.80648e-08	0.587566	0.831	0.537	0.00109965	14	RPL6
RPL105	3.07559e-11	0.576925	0.969	0.747	4.96892e-07	14	RPL10
GZMB4	0.000675394	0.575329	0.308	0.155	1	14	GZMB
RPS275	6.13678e-15	0.568655	1	0.939	9.91458e-11	14	RPS27
RPL215	1.31427e-11	0.561655	0.985	0.878	2.12333e-07	14	RPL21
EDF13	0.00141331	0.554284	0.354	0.208	1	14	EDF1
TMSB105	4.90768e-12	0.544847	0.985	0.812	7.92884e-08	14	TMSB10
RPL23A3	8.02954e-08	0.538672	0.8	0.542	0.00129725	14	RPL23A
RPS15A4	3.43921e-09	0.538153	0.923	0.669	5.55638e-05	14	RPS15A
RPS294	1.83392e-10	0.534904	0.985	0.819	2.96289e-06	14	RPS29
MIF5	0.00184006	0.534121	0.323	0.178	1	14	MIF
HNRNPK2	0.000754077	0.530049	0.4	0.238	1	14	HNRNPK
RPL9P93	9.19224e-05	0.529809	0.554	0.365	1	14	RPL9P9
RPL13AP53	3.43955e-06	0.522917	0.477	0.217	0.0555693	14	RPL13AP5
RPS214	1.73563e-07	0.521865	0.846	0.628	0.00280408	14	RPS2
FAU4	2.47727e-05	0.518777	0.785	0.584	0.400227	14	FAU
HLA-B3	2.88304e-08	0.508633	0.862	0.616	0.000465784	14	HLA-B
RPS155	5.13475e-09	0.508478	0.954	0.737	8.29569e-05	14	RPS15
TXNIP2	0.000625466	0.503181	0.323	0.164	1	14	TXNIP
MT-ND55	0.000275955	0.492489	0.554	0.375	1	14	MT-ND5
RPS285	8.68835e-07	0.491546	0.785	0.531	0.0140369	14	RPS28
RPLP24	1.85941e-07	0.48421	0.908	0.777	0.00300406	14	RPLP2
PSME13	0.00454264	0.482954	0.369	0.232	1	14	PSME1
MSN	0.0014063	0.481504	0.262	0.127	1	14	MSN
MT-ND4L2	0.00202379	0.477668	0.369	0.214	1	14	MT-ND4L
RPL273	4.67253e-05	0.475269	0.785	0.648	0.754893	14	RPL27
DDX53	0.00383542	0.475064	0.4	0.256	1	14	DDX5
EEF1A13	1.13057e-07	0.471768	0.908	0.789	0.00182655	14	EEF1A1
RPL84	4.91757e-07	0.467184	0.831	0.628	0.00794483	14	RPL8
TRAC4	0.00109293	0.466856	0.308	0.159	1	14	TRAC
UBC3	0.00507886	0.466469	0.431	0.303	1	14	UBC
RPL304	2.95893e-06	0.456088	0.908	0.735	0.0478045	14	RPL30
RP11-425L10.12	0.00544854	0.446698	0.277	0.153	1	14	RP11-425L10.1
RPS27A5	2.29283e-07	0.440284	0.954	0.825	0.0037043	14	RPS27A
CCL54	1.54039e-05	0.437612	0.569	0.307	0.248865	14	CCL5
RPS74	0.00117017	0.436455	0.615	0.463	1	14	RPS7
RPL27A3	1.02655e-08	0.43645	0.969	0.841	0.000165849	14	RPL27A
RPL44	0.00638262	0.433349	0.554	0.452	1	14	RPL4
RPL113	1.05135e-06	0.429126	0.892	0.724	0.0169856	14	RPL11
EEF1D3	0.0066918	0.428792	0.462	0.314	1	14	EEF1D
RPL413	6.44877e-07	0.427081	0.862	0.59	0.0104186	14	RPL41
RPL135	2.11879e-07	0.420158	0.954	0.772	0.00342312	14	RPL13
RPS124	4.66881e-06	0.419831	0.877	0.746	0.0754293	14	RPS12
RPL392	6.304e-05	0.419358	0.769	0.63	1	14	RPL39
RPL18A3	1.2361e-06	0.416067	0.862	0.657	0.0199704	14	RPL18A
RPS35	3.81016e-05	0.415841	0.923	0.787	0.61557	14	RPS3
RPL53	0.000230554	0.413802	0.754	0.626	1	14	RPL5
RPL342	1.3858e-09	0.40923	1	0.929	2.2389e-05	14	RPL34
RPL185	0.000176798	0.407473	0.708	0.552	1	14	RPL18
EIF13	0.000993341	0.406462	0.708	0.522	1	14	EIF1
RPL10A4	0.000343691	0.404378	0.662	0.473	1	14	RPL10A
MTATP6P13	0.00274705	0.386486	0.446	0.273	1	14	MTATP6P1
RPS81	5.04343e-05	0.381526	0.8	0.661	0.814816	14	RPS8
SH3BGRL36	0.000363941	0.37562	0.754	0.572	1	14	SH3BGRL3
RPL383	0.00144352	0.374128	0.692	0.511	1	14	RPL38
MT-CO14	1.45232e-10	0.371887	0.985	0.966	2.34636e-06	14	MT-CO1
RPS253	0.000536271	0.370703	0.815	0.687	1	14	RPS25
PPIA3	0.00300686	0.368182	0.569	0.411	1	14	PPIA
PFDN53	0.00614612	0.359448	0.662	0.521	1	14	PFDN5
RPS113	6.97707e-07	0.35645	0.938	0.704	0.0112721	14	RPS11
RPS133	2.93403e-05	0.352723	0.785	0.626	0.474022	14	RPS13
RPL93	0.00262392	0.352248	0.769	0.65	1	14	RPL9
RPL285	0.000858314	0.342956	0.815	0.653	1	14	RPL28
MT-ND22	0.000897854	0.338917	0.738	0.593	1	14	MT-ND2
FTH14	0.00181903	0.330318	0.723	0.516	1	14	FTH1
RPL35A4	7.86293e-05	0.33014	0.892	0.746	1	14	RPL35A
RPL245	0.00249094	0.328084	0.631	0.499	1	14	RPL24
HLA-C3	0.00431371	0.306775	0.646	0.483	1	14	HLA-C
RP11-543P15.13	0.00040041	0.3067	0.6	0.395	1	14	RP11-543P15.1
RPL373	0.00143034	0.299524	0.769	0.64	1	14	RPL37
RPS233	6.18669e-05	0.298348	0.923	0.757	0.999521	14	RPS23
RPS184	8.06933e-05	0.297366	0.877	0.759	1	14	RPS18
RPS93	0.00867714	0.294701	0.662	0.532	1	14	RPS9
RPS3A4	2.75306e-05	0.292912	0.985	0.789	0.444784	14	RPS3A
RPL234	0.000381788	0.290268	0.723	0.531	1	14	RPL23
MT-ATP62	0.00481877	0.282542	0.954	0.919	1	14	MT-ATP6
MT-CO33	5.65255e-06	0.276822	1	0.966	0.0913226	14	MT-CO3
RPL194	0.00822854	0.275809	0.8	0.717	1	14	RPL19
GZMH4	0.00445532	0.274402	0.277	0.141	1	14	GZMH
RPL151	0.000702395	0.273328	0.954	0.771	1	14	RPL15
MT-ND42	4.11785e-05	0.269237	1	0.905	0.66528	14	MT-ND4
RPLP13	0.000157532	0.257969	0.954	0.853	1	14	RPLP1

## Sheet: P20-Relapse
Supplementary Table 9-3: Marker genes of P20 in UMAP pre and post regimen
	p_val	avg_logFC	pct.1	pct.2	p_val_adj	cluster	gene		cell type
HBB	0	0.660026	0.998	0.911	0	1	HBB		AML progenitor cell_nonspecificity
HBG2	2.45152e-06	0.64788	0.504	0.72	0.00490303	1	HBG2
IGHG4	1.72791e-13	0.59342	0.385	0.52	3.45582e-10	1	IGHG4
HBA1	0	0.591099	0.959	0.778	0	1	HBA1
HBA2	0	0.575201	0.966	0.808	0	1	HBA2
DEFA3	0	0.460411	0.855	0.726	0	1	DEFA3
MPO	0	0.453245	0.99	0.955	0	1	MPO
PRTN3	0	0.415832	0.945	0.862	0	1	PRTN3
S100A9	0	0.412077	1	0.998	0	1	S100A9
CFD	5.46915e-40	0.406682	0.702	0.857	1.09383e-36	1	CFD
CST3	2.0175e-28	0.399806	0.65	0.82	4.035e-25	1	CST3
LGALS1	1.22716e-69	0.351138	0.72	0.787	2.45433e-66	1	LGALS1
AZU1	8.77763e-99	0.343312	0.769	0.786	1.75553e-95	1	AZU1
HBD	7.09714e-137	0.341562	0.525	0.475	1.41943e-133	1	HBD
S100A12	0	0.341514	0.946	0.863	0	1	S100A12
DEFB1	6.9851e-125	0.339987	0.255	0.592	1.39702e-121	1	DEFB1
DEFA4	1.9614e-63	0.335801	0.636	0.706	3.92279e-60	1	DEFA4
SOX4	0.000207786	0.333591	0.445	0.619	0.415571	1	SOX4
ELANE	1.73513e-286	0.297559	0.956	0.878	3.47026e-283	1	ELANE
CAMP	1.25698e-299	0.28975	0.84	0.774	2.51395e-296	1	CAMP
FCGRT	2.16553e-163	0.288251	0.269	0.618	4.33105e-160	1	FCGRT
LYZ	1.75297e-250	0.26739	1	0.987	3.50595e-247	1	LYZ
LCN2	1.41555e-144	0.260782	0.736	0.763	2.83111e-141	1	LCN2
TRH	8.71804e-116	0.725871	0.696	0.551	1.74361e-112	2	TRH		AML progenitor cell
HPGDS	0.0058342	0.693849	0.386	0.39	1	2	HPGDS
NPM1	2.35005e-178	0.667095	0.744	0.553	4.7001e-175	2	NPM1
ITM2A	4.62815e-05	0.657048	0.406	0.393	0.0925629	2	ITM2A
PRSS57	1.06894e-155	0.596346	0.745	0.634	2.13789e-152	2	PRSS57
HLA-DPA1	7.55277e-132	0.566742	0.798	0.658	1.51055e-128	2	HLA-DPA1
RP11-234A1.1	1.19886e-76	0.515648	0.581	0.405	2.39773e-73	2	RP11-234A1.1
AKR1C3	2.00249e-16	0.487336	0.33	0.319	4.00499e-13	2	AKR1C3
MTATP6P1	2.01646e-215	0.486012	0.878	0.7	4.03293e-212	2	MTATP6P1
CAV1	7.29417e-62	0.484455	0.6	0.465	1.45883e-58	2	CAV1
EEF1A1	9.60055e-240	0.481499	0.895	0.731	1.92011e-236	2	EEF1A1
CD74	0	0.470148	0.972	0.88	0	2	CD74
EGFL7	0.000595043	0.46026	0.457	0.432	1	2	EGFL7
HLA-DPB1	1.00435e-60	0.452936	0.694	0.632	2.00869e-57	2	HLA-DPB1
RP11-466H18.1	2.34682e-156	0.448071	0.741	0.538	4.69364e-153	2	RP11-466H18.1
DBI	8.36799e-99	0.442216	0.718	0.572	1.6736e-95	2	DBI
RP11-543P15.1	1.67187e-71	0.435021	0.593	0.407	3.34375e-68	2	RP11-543P15.1
RPS18	0	0.434637	0.996	0.974	0	2	RPS18
TPM4	8.7975e-30	0.433788	0.409	0.443	1.7595e-26	2	TPM4
PEBP1	1.05829e-06	0.428416	0.545	0.469	0.00211657	2	PEBP1
CD69	1.69416e-57	0.425713	0.281	0.301	3.38831e-54	2	CD69
RPL10AP6	2.95379e-224	0.420796	0.708	0.503	5.90758e-221	2	RPL10AP6
RPL7P9	2.21507e-20	0.420313	0.434	0.284	4.43013e-17	2	RPL7P9
SOX4	1.21473e-06	0.416194	0.582	0.578	0.00242947	2	SOX4
CYTL1	2.81998e-17	0.415187	0.622	0.535	5.63996e-14	2	CYTL1
TAGLN2	3.44946e-06	0.412365	0.547	0.497	0.00689891	2	TAGLN2
RPS25	7.84805e-192	0.410781	0.902	0.778	1.56961e-188	2	RPS25
ITM2C	3.85869e-43	0.403356	0.632	0.516	7.71738e-40	2	ITM2C
RPLP0	1.6611e-234	0.377559	0.959	0.858	3.32219e-231	2	RPLP0
S100B	6.05661e-11	0.368812	0.479	0.512	1.21132e-07	2	S100B
IGFBP7	1.92208e-10	0.367533	0.41	0.422	3.84416e-07	2	IGFBP7
RPS29	2.68275e-278	0.364966	0.987	0.939	5.36549e-275	2	RPS29
HLA-DRB1	4.99289e-86	0.361989	0.737	0.663	9.98578e-83	2	HLA-DRB1
PIM1	1.22593e-107	0.359663	0.309	0.403	2.45187e-104	2	PIM1
EEF1B2	1.07839e-119	0.359005	0.829	0.716	2.15679e-116	2	EEF1B2
MIF	1.27593e-186	0.354853	0.798	0.598	2.55186e-183	2	MIF
RP11-475C16.1	6.0188e-183	0.353231	0.71	0.499	1.20376e-179	2	RP11-475C16.1
ESD	3.85024e-05	0.352926	0.526	0.456	0.0770049	2	ESD
RP11-354E11.2	2.88671e-118	0.347823	0.254	0.282	5.77341e-115	2	RP11-354E11.2
RPS27	0	0.347289	0.998	0.986	0	2	RPS27
RPS3AP6	4.40303e-160	0.343068	0.655	0.428	8.80606e-157	2	RPS3AP6
MYC	0.00250331	0.342563	0.334	0.267	1	2	MYC
CLEC2B	1.46484e-75	0.337943	0.254	0.28	2.92968e-72	2	CLEC2B
SLC25A5	1.14754e-37	0.332834	0.635	0.504	2.29507e-34	2	SLC25A5
CLIC1	1.41289e-83	0.329943	0.801	0.646	2.82578e-80	2	CLIC1
HIST1H2AC	1.8948e-123	0.329835	0.612	0.448	3.7896e-120	2	HIST1H2AC
CD38	9.29924e-32	0.327254	0.328	0.327	1.85985e-28	2	CD38
RPS7P1	3.34132e-82	0.324946	0.526	0.358	6.68264e-79	2	RPS7P1
RPL41	1.61605e-107	0.3219	0.876	0.767	3.23209e-104	2	RPL41
RPL31	2.35314e-248	0.320376	0.995	0.974	4.70627e-245	2	RPL31
C1orf186	2.78071e-35	0.317929	0.521	0.406	5.56142e-32	2	C1orf186
VTRNA1-1	1.08943e-76	0.317742	0.593	0.47	2.17886e-73	2	VTRNA1-1
TUBA1A	2.13625e-117	0.313191	0.264	0.37	4.27251e-114	2	TUBA1A
PSMB8	3.35558e-21	0.295671	0.434	0.302	6.71116e-18	2	PSMB8
RPS6	6.34103e-249	0.292818	0.998	0.979	1.26821e-245	2	RPS6
CHST12	0.000223944	0.29033	0.433	0.375	0.447889	2	CHST12
RPL6P27	1.90161e-61	0.288578	0.559	0.392	3.80321e-58	2	RPL6P27
LDHB	1.93158e-60	0.288501	0.735	0.646	3.86316e-57	2	LDHB
FAM212A	1.84071e-07	0.285695	0.383	0.347	0.000368142	2	FAM212A
PPIA	8.71409e-76	0.28179	0.839	0.701	1.74282e-72	2	PPIA
LGALS3BP	4.58603e-150	0.281423	0.189	0.219	9.17207e-147	2	LGALS3BP
RP11-386I14.4	8.25051e-05	0.272969	0.397	0.358	0.16501	2	RP11-386I14.4
UCP2	5.56308e-51	0.257441	0.363	0.426	1.11262e-47	2	UCP2
TMEM176A	3.32969e-76	0.255903	0.674	0.541	6.65938e-73	2	TMEM176A
ECI2	1.09629e-12	0.25447	0.293	0.241	2.19258e-09	2	ECI2
PHB	3.12203e-73	0.25378	0.552	0.373	6.24407e-70	2	PHB
HLA-DRA	1.48466e-124	0.251737	0.876	0.81	2.96933e-121	2	HLA-DRA
RPS27AP16	9.37272e-144	0.25088	0.701	0.509	1.87454e-140	2	RPS27AP16
NHP2	4.69617e-07	0.250325	0.494	0.488	0.000939234	2	NHP2
CST3	0	1.45076	0.935	0.768	0	3	CST3		Monocyte
CD14	6.54908e-58	1.32987	0.552	0.504	1.30982e-54	3	CD14
MS4A6A	2.73942e-170	1.32546	0.771	0.618	5.47884e-167	3	MS4A6A
CTSS	1.65697e-225	1.32238	0.816	0.588	3.31393e-222	3	CTSS
VCAN	1.86076e-43	1.18373	0.509	0.476	3.72151e-40	3	VCAN
ANXA2	2.2178e-161	1.13275	0.635	0.358	4.43561e-158	3	ANXA2
FOS	3.81544e-172	1.1306	0.773	0.489	7.63088e-169	3	FOS
LGALS2	2.32839e-86	1.12485	0.584	0.512	4.65678e-83	3	LGALS2
DUSP1	4.59548e-131	1.08816	0.653	0.481	9.19095e-128	3	DUSP1
RGS2	4.67325e-46	1.07191	0.564	0.561	9.34651e-43	3	RGS2
CTSB	7.6924e-102	0.956334	0.643	0.526	1.53848e-98	3	CTSB
S100A4	1.0985e-207	0.941782	0.937	0.77	2.19701e-204	3	S100A4
FCN1	2.48913e-92	0.922951	0.797	0.721	4.97825e-89	3	FCN1
CPVL	5.75837e-62	0.916421	0.527	0.423	1.15167e-58	3	CPVL
PILRA	2.0344e-54	0.906577	0.554	0.557	4.0688e-51	3	PILRA
SAMHD1	9.25305e-78	0.893974	0.529	0.414	1.85061e-74	3	SAMHD1
HLA-DRB1	6.992e-143	0.883643	0.862	0.674	1.3984e-139	3	HLA-DRB1
RNASE6	3.86621e-67	0.882472	0.592	0.556	7.73242e-64	3	RNASE6
S100A10	2.21659e-107	0.833411	0.678	0.486	4.43318e-104	3	S100A10
FGL2	2.41144e-39	0.766472	0.397	0.305	4.82287e-36	3	FGL2
JUN	1.29769e-50	0.746356	0.547	0.547	2.59538e-47	3	JUN
FTH1	1.41745e-69	0.726674	0.917	0.854	2.83491e-66	3	FTH1
LYZ	1.60119e-296	0.722559	1	0.989	3.20238e-293	3	LYZ
CD74	8.18091e-194	0.721436	0.976	0.907	1.63618e-190	3	CD74
IGSF6	8.43376e-13	0.714911	0.424	0.421	1.68675e-09	3	IGSF6
MPEG1	2.09035e-24	0.70644	0.486	0.511	4.18071e-21	3	MPEG1
SCPEP1	1.7108e-26	0.700748	0.548	0.571	3.4216e-23	3	SCPEP1
S100A6	1.33987e-155	0.663233	0.908	0.695	2.67974e-152	3	S100A6
HLA-DRA	3.16813e-100	0.656058	0.922	0.825	6.33626e-97	3	HLA-DRA
CCL3	1.01703e-35	0.65337	0.453	0.412	2.03407e-32	3	CCL3
CSTA	2.44534e-103	0.651485	0.842	0.719	4.89068e-100	3	CSTA
LGALS1	1.23866e-120	0.633196	0.893	0.762	2.47732e-117	3	LGALS1
MS4A7	3.04996e-10	0.629571	0.428	0.444	6.09992e-07	3	MS4A7
POU2F2	6.69004e-34	0.590462	0.476	0.459	1.33801e-30	3	POU2F2
CCL3L3	3.41815e-48	0.581454	0.462	0.413	6.8363e-45	3	CCL3L3
VIM	4.19722e-77	0.569746	0.768	0.576	8.39443e-74	3	VIM
HLA-DMB	1.31179e-68	0.565798	0.569	0.495	2.62358e-65	3	HLA-DMB
TNFSF10	1.08167e-09	0.560847	0.389	0.388	2.16334e-06	3	TNFSF10
JAML	1.12291e-06	0.550464	0.471	0.518	0.00224583	3	JAML
ZFP36	3.41541e-22	0.549997	0.515	0.522	6.83082e-19	3	ZFP36
LGALS3	1.48461e-28	0.547471	0.57	0.574	2.96921e-25	3	LGALS3
KCTD12	5.23128e-20	0.544134	0.351	0.309	1.04626e-16	3	KCTD12
FCGRT	5.68644e-64	0.541189	0.574	0.536	1.13729e-60	3	FCGRT
FPR1	5.54265e-06	0.53934	0.509	0.551	0.0110853	3	FPR1
SLC11A1	5.42979e-25	0.539133	0.494	0.52	1.08596e-21	3	SLC11A1
CSTB	1.02012e-11	0.536937	0.476	0.487	2.04024e-08	3	CSTB
SULT1A1	7.10901e-38	0.509377	0.524	0.511	1.4218e-34	3	SULT1A1
SAT1	1.79076e-16	0.50914	0.572	0.557	3.58153e-13	3	SAT1
GIMAP4	2.09771e-27	0.499166	0.396	0.34	4.19543e-24	3	GIMAP4
TMSB4X	5.16038e-267	0.493245	1	0.991	1.03208e-263	3	TMSB4X
FCER1G	1.24677e-101	0.492527	0.921	0.832	2.49353e-98	3	FCER1G
SERPINF1	8.46193e-31	0.480056	0.527	0.554	1.69239e-27	3	SERPINF1
CFD	4.09851e-91	0.476352	0.881	0.816	8.19702e-88	3	CFD
IRF8	9.09112e-25	0.462334	0.47	0.461	1.81822e-21	3	IRF8
CD68	1.45591e-12	0.461945	0.351	0.33	2.91183e-09	3	CD68
MNDA	3.52964e-56	0.453292	0.695	0.591	7.05929e-53	3	MNDA
LILRB2	7.66017e-21	0.452901	0.479	0.489	1.53203e-17	3	LILRB2
CD36	3.05765e-10	0.45246	0.386	0.394	6.1153e-07	3	CD36
RASSF4	9.93888e-14	0.450683	0.494	0.527	1.98778e-10	3	RASSF4
RP11-108M9.4	7.40158e-11	0.437563	0.435	0.468	1.48032e-07	3	RP11-108M9.4
GIMAP7	9.6264e-06	0.430006	0.344	0.348	0.0192528	3	GIMAP7
HLA-DPB1	8.51726e-37	0.420836	0.752	0.645	1.70345e-33	3	HLA-DPB1
HLA-DPA1	2.29609e-43	0.420465	0.787	0.7	4.59219e-40	3	HLA-DPA1
FTL	1.52068e-172	0.420125	1	0.997	3.04136e-169	3	FTL
BLVRB	4.4757e-52	0.39543	0.681	0.622	8.95141e-49	3	BLVRB
HLA-DQB1	1.50693e-28	0.394222	0.473	0.447	3.01387e-25	3	HLA-DQB1
ASGR1	1.06775e-22	0.386383	0.334	0.241	2.13549e-19	3	ASGR1
B2M	9.07933e-192	0.380811	1	0.993	1.81587e-188	3	B2M
CD86	0.000626679	0.364804	0.346	0.345	1	3	CD86
TMEM176A	2.76693e-41	0.362984	0.61	0.586	5.53386e-38	3	TMEM176A
TSPO	2.41648e-90	0.357982	0.818	0.712	4.83297e-87	3	TSPO
CLEC7A	3.60456e-13	0.349745	0.377	0.372	7.20912e-10	3	CLEC7A
CD1D	1.07159e-10	0.349738	0.421	0.429	2.14318e-07	3	CD1D
CECR1	1.96363e-12	0.337292	0.488	0.53	3.92726e-09	3	CECR1
ASGR2	7.11699e-27	0.3351	0.443	0.425	1.4234e-23	3	ASGR2
PLBD1	4.81733e-24	0.332292	0.522	0.501	9.63466e-21	3	PLBD1
AHNAK	0.00338979	0.310232	0.296	0.39	1	3	AHNAK
SCIMP	0.0051425	0.304969	0.38	0.426	1	3	SCIMP
RP11-386I14.4	1.11541e-32	0.303812	0.419	0.368	2.23083e-29	3	RP11-386I14.4
CLIC1	3.20633e-24	0.285674	0.74	0.698	6.41266e-21	3	CLIC1
FCGR3A	7.60124e-17	0.28353	0.18	0.324	1.52025e-13	3	FCGR3A
SDHD	6.13446e-15	0.274234	0.423	0.398	1.22689e-11	3	SDHD
CEBPD	5.43412e-18	0.265873	0.458	0.444	1.08682e-14	3	CEBPD
MGST3	1.54984e-21	0.262316	0.524	0.467	3.09969e-18	3	MGST3
KLF6	2.50905e-26	0.258512	0.527	0.448	5.0181e-23	3	KLF6
WARS	1.40127e-13	0.252088	0.385	0.377	2.80254e-10	3	WARS
TFF3	0	2.83638	0.953	0.708	0	4	TFF3		Neutrophil C
PGLYRP1	0	2.32108	0.975	0.735	0	4	PGLYRP1
LTF	0	2.24841	0.855	0.526	0	4	LTF
CD177	0	2.1767	0.849	0.574	0	4	CD177
MMP8	1.22289e-224	2.05783	0.723	0.448	2.44577e-221	4	MMP8
CAMP	0	2.05453	0.948	0.776	0	4	CAMP
HP	0	2.04332	0.812	0.524	0	4	HP
MMP9	1.98552e-197	2.04221	0.729	0.502	3.97104e-194	4	MMP9
S100A12	0	2.03354	0.977	0.874	0	4	S100A12
LCN2	0	2.01893	0.918	0.744	0	4	LCN2
PLBD1	0	1.96616	0.799	0.478	0	4	PLBD1
ARG1	3.0695e-259	1.83852	0.734	0.464	6.139e-256	4	ARG1
ALOX5AP	0	1.78773	0.885	0.587	0	4	ALOX5AP
ANXA3	1.65908e-276	1.75979	0.806	0.459	3.31816e-273	4	ANXA3
S100A8	0	1.71115	1	0.997	0	4	S100A8
FCN1	0	1.64559	0.943	0.709	0	4	FCN1
FPR1	4.4599e-266	1.63848	0.79	0.528	8.91981e-263	4	FPR1
CDA	6.45008e-294	1.60173	0.839	0.574	1.29002e-290	4	CDA
ORM1	2.96346e-274	1.58932	0.75	0.542	5.92691e-271	4	ORM1
OLFM4	6.74134e-66	1.56555	0.594	0.492	1.34827e-62	4	OLFM4
S100P	0	1.55215	0.923	0.628	0	4	S100P
CYSTM1	9.53759e-245	1.53774	0.837	0.569	1.90752e-241	4	CYSTM1
RGL4	9.32565e-254	1.52549	0.763	0.433	1.86513e-250	4	RGL4
TSPO	0	1.49608	0.945	0.702	0	4	TSPO
G0S2	8.67176e-154	1.49477	0.698	0.558	1.73435e-150	4	G0S2
GCA	0	1.49101	0.885	0.484	0	4	GCA
PADI4	1.55079e-37	1.47378	0.536	0.405	3.10158e-34	4	PADI4
S100A6	0	1.45818	0.948	0.693	0	4	S100A6
TCN1	2.09654e-17	1.44236	0.5	0.461	4.19308e-14	4	TCN1
MCEMP1	9.30338e-238	1.43375	0.77	0.55	1.86068e-234	4	MCEMP1
MSRB1	8.72761e-212	1.43355	0.771	0.526	1.74552e-208	4	MSRB1
FCGR3B	4.31951e-63	1.40475	0.569	0.449	8.63901e-60	4	FCGR3B
CHI3L1	7.00614e-216	1.37695	0.684	0.444	1.40123e-212	4	CHI3L1
S100A9	0	1.35798	1	0.999	0	4	S100A9
QPCT	7.17878e-45	1.30463	0.536	0.394	1.43576e-41	4	QPCT
CEACAM1	1.85236e-191	1.29415	0.646	0.381	3.70472e-188	4	CEACAM1
BCL2A1	1.094e-234	1.18246	0.729	0.519	2.188e-231	4	BCL2A1
ALOX5	6.64565e-157	1.17998	0.624	0.427	1.32913e-153	4	ALOX5
MNDA	1.35533e-145	1.17439	0.748	0.588	2.71066e-142	4	MNDA
CMTM2	2.55209e-109	1.1304	0.696	0.548	5.10419e-106	4	CMTM2
C5AR1	2.22826e-108	1.11515	0.622	0.492	4.45652e-105	4	C5AR1
OLR1	6.32185e-60	1.11417	0.531	0.413	1.26437e-56	4	OLR1
CYP4F3	3.14082e-28	1.11026	0.501	0.439	6.28163e-25	4	CYP4F3
FCER1G	1.09103e-200	1.09844	0.961	0.829	2.18205e-197	4	FCER1G
LGALS3	2.5404e-202	1.08116	0.73	0.561	5.0808e-199	4	LGALS3
CD24	4.86578e-77	1.0116	0.649	0.498	9.73156e-74	4	CD24
CPNE3	0.00325009	1.01018	0.403	0.383	1	4	CPNE3
CLEC4E	7.71357e-243	1.00179	0.648	0.357	1.54271e-239	4	CLEC4E
BPI	9.12348e-26	0.977029	0.535	0.485	1.8247e-22	4	BPI
CLEC4D	2.19099e-242	0.950832	0.632	0.296	4.38199e-239	4	CLEC4D
CEACAM8	0.000229408	0.901837	0.497	0.53	0.458816	4	CEACAM8
TMSB4X	0	0.897272	0.999	0.991	0	4	TMSB4X
VNN2	1.07782e-143	0.886449	0.684	0.531	2.15564e-140	4	VNN2
TSPAN2	1.57669e-149	0.843261	0.633	0.445	3.15338e-146	4	TSPAN2
IFITM3	1.85426e-57	0.837273	0.742	0.605	3.70851e-54	4	IFITM3
CA4	1.62291e-210	0.832467	0.65	0.439	3.24582e-207	4	CA4
P2RY13	4.7701e-20	0.795309	0.312	0.418	9.5402e-17	4	P2RY13
TUBA4A	3.11473e-158	0.792293	0.7	0.5	6.22945e-155	4	TUBA4A
JAML	9.90003e-171	0.778634	0.675	0.501	1.98001e-167	4	JAML
GLRX	3.02603e-54	0.765225	0.705	0.556	6.05206e-51	4	GLRX
CSTB	1.70771e-174	0.727319	0.684	0.47	3.41541e-171	4	CSTB
FAM101B	4.14315e-11	0.715497	0.315	0.377	8.2863e-08	4	FAM101B
VIM	8.4309e-88	0.696146	0.766	0.577	1.68618e-84	4	VIM
FOLR3	2.45194e-70	0.682021	0.503	0.31	4.90388e-67	4	FOLR3
RGS2	1.40257e-09	0.675517	0.614	0.557	2.80514e-06	4	RGS2
TNFAIP6	2.56282e-157	0.665721	0.628	0.448	5.12564e-154	4	TNFAIP6
DRC1	9.37052e-164	0.659515	0.602	0.376	1.8741e-160	4	DRC1
LILRB2	1.10809e-54	0.640577	0.564	0.482	2.21618e-51	4	LILRB2
RETN	6.43853e-34	0.5903	0.826	0.838	1.28771e-30	4	RETN
UGCG	8.25805e-28	0.5896	0.229	0.311	1.65161e-24	4	UGCG
CLC	7.45287e-17	0.586406	0.216	0.248	1.49057e-13	4	CLC
SUSD3	6.53063e-156	0.58557	0.591	0.341	1.30613e-152	4	SUSD3
IER3	3.18997e-111	0.572115	0.614	0.491	6.37993e-108	4	IER3
ACSL1	2.27396e-60	0.571246	0.535	0.368	4.54792e-57	4	ACSL1
B4GALT5	5.7359e-06	0.553579	0.234	0.26	0.0114718	4	B4GALT5
SVIP	5.45317e-09	0.543483	0.373	0.274	1.09063e-05	4	SVIP
COL17A1	5.24736e-48	0.530501	0.46	0.292	1.04947e-44	4	COL17A1
CTSS	2.9383e-62	0.526697	0.732	0.596	5.87661e-59	4	CTSS
CSTA	3.24837e-33	0.514241	0.817	0.722	6.49675e-30	4	CSTA
FPR2	0.00331414	0.506779	0.395	0.355	1	4	FPR2
CXCL8	9.07814e-78	0.47027	0.639	0.541	1.81563e-74	4	CXCL8
KLF6	1.944e-79	0.447225	0.682	0.435	3.88799e-76	4	KLF6
GCLM	5.52852e-34	0.444964	0.479	0.357	1.1057e-30	4	GCLM
OSCAR	1.40124e-66	0.437328	0.61	0.503	2.80247e-63	4	OSCAR
CHIT1	0.000432595	0.437296	0.186	0.09	0.865191	4	CHIT1
SAT1	3.43348e-30	0.434264	0.675	0.549	6.86696e-27	4	SAT1
SULT1A1	1.4403e-81	0.432873	0.648	0.501	2.8806e-78	4	SULT1A1
STX3	1.25741e-34	0.428289	0.496	0.414	2.51481e-31	4	STX3
JUNB	5.96587e-15	0.41325	0.592	0.542	1.19317e-11	4	JUNB
RBP7	6.54618e-73	0.407026	0.6	0.471	1.30924e-69	4	RBP7
IGSF6	1.40526e-08	0.402994	0.389	0.424	2.81051e-05	4	IGSF6
PTX3	2.28278e-111	0.399349	0.421	0.117	4.56556e-108	4	PTX3
HSPA6	9.06994e-88	0.380078	0.616	0.538	1.81399e-84	4	HSPA6
ADAM8	1.87513e-61	0.37943	0.488	0.317	3.75026e-58	4	ADAM8
FAM107B	7.17348e-06	0.371099	0.3	0.337	0.014347	4	FAM107B
RP11-1143G9.4	3.21783e-07	0.365673	0.636	0.65	0.000643567	4	RP11-1143G9.4
KIAA0513	1.20167e-47	0.357851	0.48	0.368	2.40335e-44	4	KIAA0513
INHBA	5.75672e-79	0.350148	0.515	0.364	1.15134e-75	4	INHBA
VNN1	4.21675e-22	0.346544	0.222	0.224	8.43349e-19	4	VNN1
LYZ	6.61799e-84	0.334112	0.999	0.989	1.3236e-80	4	LYZ
RASGRP4	8.05868e-48	0.333591	0.571	0.459	1.61174e-44	4	RASGRP4
NAMPT	1.63356e-31	0.332823	0.353	0.484	3.26712e-28	4	NAMPT
RAB10	2.16627e-09	0.332668	0.436	0.361	4.33254e-06	4	RAB10
BTNL8	4.21325e-36	0.327644	0.504	0.434	8.42651e-33	4	BTNL8
MT-RNR2	1.87199e-93	0.323188	0.998	0.998	3.74399e-90	4	MT-RNR2
TRMT6	4.28237e-174	0.322185	0.588	0.309	8.56475e-171	4	TRMT6
APOBEC3A	5.04669e-23	0.319913	0.429	0.32	1.00934e-19	4	APOBEC3A
SLC37A3	3.29457e-34	0.31408	0.381	0.195	6.58915e-31	4	SLC37A3
KBTBD7	8.12759e-16	0.312146	0.193	0.261	1.62552e-12	4	KBTBD7
PILRA	3.48591e-24	0.307781	0.616	0.551	6.97181e-21	4	PILRA
FAR2	1.52249e-71	0.303555	0.227	0.41	3.04497e-68	4	FAR2
TMSB4XP4	1.18963e-31	0.300894	0.5	0.354	2.37927e-28	4	TMSB4XP4
TMEM63A	2.54846e-99	0.296857	0.594	0.428	5.09693e-96	4	TMEM63A
RBM38	2.05905e-92	0.296677	0.557	0.413	4.11811e-89	4	RBM38
LRRC4	1.41579e-14	0.296489	0.369	0.253	2.83158e-11	4	LRRC4
ADGRE3	2.32599e-50	0.29018	0.524	0.441	4.65199e-47	4	ADGRE3
ZNF467	1.18987e-105	0.28607	0.599	0.47	2.37973e-102	4	ZNF467
FAM65B	1.54559e-31	0.285111	0.457	0.343	3.09117e-28	4	FAM65B
ZFP36	4.98274e-104	0.271426	0.661	0.51	9.96549e-101	4	ZFP36
SULT1B1	7.97557e-08	0.269393	0.457	0.44	0.000159511	4	SULT1B1
VEPH1	3.16867e-45	0.267996	0.154	0.157	6.33734e-42	4	VEPH1
CSF2RB	3.53988e-54	0.261241	0.498	0.364	7.07976e-51	4	CSF2RB
GGTA1P	1.04385e-14	0.252381	0.395	0.286	2.08769e-11	4	GGTA1P
UBE2C	5.83016e-73	1.20259	0.628	0.384	1.16603e-69	5	UBE2C		Proliferating cell
KIAA0101	7.68326e-168	1.04225	0.777	0.398	1.53665e-164	5	KIAA0101
HMGB2	2.07495e-196	0.969548	0.916	0.558	4.1499e-193	5	HMGB2
CKS1B	2.3465e-64	0.954215	0.604	0.296	4.69301e-61	5	CKS1B
HMGB1	3.06414e-179	0.938787	0.943	0.608	6.12828e-176	5	HMGB1
TK1	2.36184e-11	0.88187	0.504	0.319	4.72368e-08	5	TK1
PTTG1	1.77458e-121	0.866126	0.673	0.321	3.54916e-118	5	PTTG1
TYMS	7.11312e-108	0.840608	0.71	0.417	1.42262e-104	5	TYMS
LSM4	1.02605e-82	0.807691	0.661	0.382	2.0521e-79	5	LSM4
MIF	1.18509e-223	0.784027	0.938	0.647	2.37019e-220	5	MIF
DUT	3.27915e-43	0.778856	0.612	0.309	6.5583e-40	5	DUT
TUBB	1.13973e-107	0.771247	0.807	0.484	2.27946e-104	5	TUBB
CKS2	2.86259e-174	0.745785	0.801	0.427	5.72519e-171	5	CKS2
TUBA1B	2.74159e-154	0.707413	0.915	0.624	5.48317e-151	5	TUBA1B
NUSAP1	2.35269e-49	0.700446	0.522	0.26	4.70537e-46	5	NUSAP1
CDK1	5.97526e-59	0.694968	0.523	0.222	1.19505e-55	5	CDK1
MAD2L1	1.89031e-14	0.694829	0.458	0.232	3.78063e-11	5	MAD2L1
PCNA	3.35306e-69	0.688233	0.616	0.267	6.70613e-66	5	PCNA
CDC20	0.00572451	0.686246	0.458	0.371	1	5	CDC20
GGH	8.77663e-115	0.682459	0.63	0.29	1.75533e-111	5	GGH
PPIA	5.6387e-154	0.679468	0.982	0.732	1.12774e-150	5	PPIA
CENPM	4.06942e-24	0.659639	0.57	0.423	8.13884e-21	5	CENPM
ATP5G3	8.78728e-115	0.648836	0.888	0.565	1.75746e-111	5	ATP5G3
CDKN3	5.57633e-41	0.642376	0.562	0.339	1.11527e-37	5	CDKN3
ARL6IP1	8.94071e-16	0.641284	0.443	0.242	1.78814e-12	5	ARL6IP1
SNRPB	3.1108e-145	0.63528	0.835	0.503	6.2216e-142	5	SNRPB
CCNB1	2.28692e-06	0.624178	0.473	0.334	0.00457385	5	CCNB1
H2AFZ	7.44463e-145	0.621805	0.949	0.628	1.48893e-141	5	H2AFZ
RANBP1	7.48094e-56	0.621464	0.594	0.311	1.49619e-52	5	RANBP1
AURKB	1.0486e-37	0.613617	0.557	0.333	2.0972e-34	5	AURKB
NUTF2	7.72346e-91	0.608287	0.676	0.368	1.54469e-87	5	NUTF2
HMGN2	1.68162e-161	0.607098	0.881	0.635	3.36323e-158	5	HMGN2
CDK4	1.92779e-110	0.603216	0.699	0.403	3.85557e-107	5	CDK4
RAN	8.84682e-71	0.601521	0.746	0.409	1.76936e-67	5	RAN
SLC25A5	2.77959e-95	0.601171	0.809	0.53	5.55918e-92	5	SLC25A5
TUBA1C	3.94502e-08	0.596925	0.508	0.372	7.89004e-05	5	TUBA1C
TUBB4B	1.43835e-103	0.595656	0.714	0.433	2.8767e-100	5	TUBB4B
CDCA3	5.223e-83	0.594418	0.587	0.312	1.0446e-79	5	CDCA3
EEF1B2	2.25493e-116	0.577246	0.957	0.74	4.50987e-113	5	EEF1B2
SOD1	9.16919e-71	0.576765	0.683	0.37	1.83384e-67	5	SOD1
RPA3	1.18767e-41	0.573987	0.6	0.336	2.37534e-38	5	RPA3
HSPD1	2.15957e-37	0.571382	0.557	0.296	4.31915e-34	5	HSPD1
COX8A	1.38432e-128	0.565369	0.878	0.559	2.76864e-125	5	COX8A
ASF1B	1.08535e-65	0.562461	0.581	0.335	2.1707e-62	5	ASF1B
PA2G4	2.83796e-48	0.562278	0.621	0.358	5.67592e-45	5	PA2G4
FABP5	3.65338e-286	0.555899	0.851	0.552	7.30675e-283	5	FABP5
CCT2	8.94988e-41	0.551584	0.578	0.334	1.78998e-37	5	CCT2
CENPW	6.58221e-31	0.549309	0.548	0.312	1.31644e-27	5	CENPW
PEBP1	2.32134e-40	0.547554	0.7	0.48	4.64267e-37	5	PEBP1
HMGA1	1.23019e-130	0.542653	0.771	0.459	2.46038e-127	5	HMGA1
KPNA2	0.00317201	0.539068	0.448	0.329	1	5	KPNA2
C19orf48	1.07697e-18	0.537715	0.544	0.375	2.15394e-15	5	C19orf48
HSPE1	6.1168e-41	0.536848	0.65	0.383	1.22336e-37	5	HSPE1
NPM1	1.54102e-83	0.531677	0.873	0.6	3.08205e-80	5	NPM1
NHP2	8.09401e-52	0.527815	0.715	0.472	1.6188e-48	5	NHP2
ZWINT	1.63737e-53	0.515264	0.556	0.28	3.27473e-50	5	ZWINT
NUCB2	1.3419e-82	0.514979	0.891	0.614	2.68379e-79	5	NUCB2
DTYMK	3.85907e-26	0.514762	0.527	0.327	7.71815e-23	5	DTYMK
PPA2	1.75913e-176	0.505123	0.752	0.414	3.51825e-173	5	PPA2
RPL41	1.01185e-98	0.504301	0.979	0.791	2.02369e-95	5	RPL41
EIF5A	1.50696e-141	0.500963	0.783	0.471	3.01393e-138	5	EIF5A
CCNB2	8.95379e-12	0.50079	0.47	0.291	1.79076e-08	5	CCNB2
CENPU	4.30876e-06	0.498395	0.443	0.278	0.00861752	5	CENPU
SRP9	1.46024e-75	0.494705	0.692	0.403	2.92047e-72	5	SRP9
TMEM14C	1.24445e-216	0.494238	0.814	0.484	2.48891e-213	5	TMEM14C
UBE2T	7.26555e-49	0.492754	0.558	0.309	1.45311e-45	5	UBE2T
FUS	3.084e-123	0.489865	0.76	0.471	6.168e-120	5	FUS
CACYBP	1.09393e-18	0.487665	0.531	0.317	2.18785e-15	5	CACYBP
ATP5G1	1.75423e-47	0.485681	0.657	0.388	3.50846e-44	5	ATP5G1
RP11-234A1.1	4.77508e-55	0.485587	0.705	0.448	9.55016e-52	5	RP11-234A1.1
SUB1	9.65878e-56	0.485118	0.767	0.494	1.93176e-52	5	SUB1
MTATP6P1	8.16028e-128	0.483808	0.949	0.748	1.63206e-124	5	MTATP6P1
RRM2	5.8452e-40	0.483335	0.597	0.389	1.16904e-36	5	RRM2
PLK1	3.69724e-56	0.483028	0.523	0.279	7.39448e-53	5	PLK1
RPS26	3.88442e-85	0.481696	0.9	0.651	7.76883e-82	5	RPS26
RPLP0	6.10665e-138	0.468618	0.998	0.885	1.22133e-134	5	RPLP0
DEK	1.06371e-155	0.45982	0.734	0.374	2.12743e-152	5	DEK
DDX39A	0.00143332	0.457072	0.464	0.342	1	5	DDX39A
RPL7P9	1.89192e-80	0.448377	0.655	0.312	3.78384e-77	5	RPL7P9
HMGB3	1.28983e-09	0.448231	0.449	0.274	2.57966e-06	5	HMGB3
CALM2	3.79893e-75	0.441963	0.831	0.529	7.59786e-72	5	CALM2
PRSS57	1.34024e-59	0.440218	0.853	0.659	2.68048e-56	5	PRSS57
RNF5	2.4384e-86	0.436845	0.639	0.388	4.8768e-83	5	RNF5
ANP32B	1.19806e-108	0.431918	0.786	0.444	2.39611e-105	5	ANP32B
ITM2A	2.08885e-07	0.43136	0.525	0.387	0.00041777	5	ITM2A
BRIX1	9.02392e-31	0.429999	0.468	0.228	1.80478e-27	5	BRIX1
PHF19	8.73368e-15	0.42854	0.499	0.327	1.74674e-11	5	PHF19
IGLL1	6.1702e-05	0.42559	0.547	0.442	0.123404	5	IGLL1
BIRC5	1.26743e-153	0.423741	0.682	0.345	2.53486e-150	5	BIRC5
RFC4	3.2085e-26	0.421227	0.521	0.314	6.41701e-23	5	RFC4
TPM4	1.01389e-30	0.415114	0.627	0.415	2.02777e-27	5	TPM4
TMPO	4.06765e-133	0.412125	0.734	0.423	8.13531e-130	5	TMPO
EEF1A1	1.43671e-91	0.410268	0.961	0.775	2.87342e-88	5	EEF1A1
PSMG1	1.37029e-68	0.398972	0.636	0.384	2.74057e-65	5	PSMG1
CCT6A	1.07544e-17	0.3981	0.507	0.316	2.15087e-14	5	CCT6A
TRH	7.25419e-38	0.39474	0.773	0.588	1.45084e-34	5	TRH
RPS25	1.33273e-81	0.393166	0.97	0.81	2.66545e-78	5	RPS25
CALR	4.01252e-59	0.392742	0.843	0.583	8.02504e-56	5	CALR
RBBP7	5.28852e-09	0.389315	0.473	0.305	1.0577e-05	5	RBBP7
GMNN	5.08298e-32	0.387689	0.558	0.366	1.0166e-28	5	GMNN
BOLA3	1.96322e-16	0.38649	0.466	0.277	3.92643e-13	5	BOLA3
MRPS34	3.01479e-84	0.385256	0.666	0.365	6.02958e-81	5	MRPS34
ATP5H	5.50535e-133	0.382254	0.814	0.5	1.10107e-129	5	ATP5H
PHB	9.24056e-51	0.381051	0.652	0.419	1.84811e-47	5	PHB
S100B	7.6636e-21	0.37647	0.661	0.488	1.53272e-17	5	S100B
PSMB8	3.18664e-24	0.375536	0.559	0.332	6.37328e-21	5	PSMB8
CAV1	1.07411e-93	0.375159	0.735	0.495	2.14821e-90	5	CAV1
MND1	8.98545e-142	0.374868	0.677	0.393	1.79709e-138	5	MND1
HLA-DRB1	4.64426e-49	0.373087	0.857	0.676	9.28852e-46	5	HLA-DRB1
DNPH1	7.68939e-75	0.369311	0.676	0.461	1.53788e-71	5	DNPH1
WDR34	1.7275e-43	0.368468	0.617	0.425	3.45499e-40	5	WDR34
TMEM14B	5.56246e-132	0.368318	0.759	0.467	1.11249e-128	5	TMEM14B
SLIRP	2.54242e-27	0.365676	0.646	0.386	5.08484e-24	5	SLIRP
DHFR	7.24059e-151	0.360465	0.678	0.343	1.44812e-147	5	DHFR
IGFBP7	1.31583e-13	0.360332	0.577	0.405	2.63165e-10	5	IGFBP7
MGST2	4.80295e-77	0.358383	0.634	0.368	9.6059e-74	5	MGST2
TAGLN2	1.37443e-27	0.357319	0.693	0.501	2.74885e-24	5	TAGLN2
EGFL7	6.55041e-28	0.356016	0.616	0.427	1.31008e-24	5	EGFL7
PRDX4	7.94315e-22	0.354928	0.532	0.338	1.58863e-18	5	PRDX4
LDHB	2.31477e-53	0.353808	0.858	0.663	4.62954e-50	5	LDHB
EXOSC5	7.83016e-81	0.352908	0.663	0.427	1.56603e-77	5	EXOSC5
MRPL14	6.2549e-49	0.348845	0.617	0.384	1.25098e-45	5	MRPL14
YBX1	1.26609e-53	0.348643	0.689	0.417	2.53218e-50	5	YBX1
SPC25	1.91686e-16	0.348053	0.525	0.358	3.83372e-13	5	SPC25
PDIA3	7.17065e-27	0.344078	0.654	0.453	1.43413e-23	5	PDIA3
HSPA8	1.50102e-57	0.342929	0.795	0.551	3.00205e-54	5	HSPA8
HSP90B1	3.74781e-20	0.341034	0.552	0.323	7.49562e-17	5	HSP90B1
CYC1	7.2946e-05	0.339622	0.511	0.385	0.145892	5	CYC1
VDAC3	8.71873e-05	0.336533	0.456	0.294	0.174375	5	VDAC3
NOP16	2.94323e-17	0.334705	0.591	0.423	5.88647e-14	5	NOP16
DBI	3.97059e-36	0.334509	0.808	0.609	7.94119e-33	5	DBI
SRI	1.39433e-05	0.33212	0.463	0.301	0.0278865	5	SRI
MYDGF	2.74326e-27	0.329118	0.641	0.415	5.48652e-24	5	MYDGF
RP11-466H18.1	1.2057e-90	0.329074	0.839	0.591	2.41141e-87	5	RP11-466H18.1
TTK	3.88619e-118	0.328865	0.611	0.297	7.77238e-115	5	TTK
CENPN	1.28198e-14	0.327668	0.499	0.322	2.56395e-11	5	CENPN
NEXN	2.96244e-81	0.327367	0.6	0.326	5.92488e-78	5	NEXN
DKC1	2.28362e-09	0.326412	0.411	0.229	4.56723e-06	5	DKC1
AURKA	2.53066e-17	0.325882	0.532	0.386	5.06131e-14	5	AURKA
HADH	2.10189e-36	0.322979	0.546	0.323	4.20377e-33	5	HADH
RP11-475C16.1	7.8968e-140	0.319501	0.824	0.554	1.57936e-136	5	RP11-475C16.1
CYTL1	3.3395e-58	0.317703	0.801	0.547	6.67901e-55	5	CYTL1
RPL13AP25	2.163e-136	0.317676	0.71	0.359	4.32599e-133	5	RPL13AP25
NDC80	8.71734e-55	0.315179	0.565	0.341	1.74347e-51	5	NDC80
MPC2	5.47308e-57	0.314552	0.762	0.539	1.09462e-53	5	MPC2
PDIA6	2.25063e-10	0.314324	0.481	0.259	4.50126e-07	5	PDIA6
NUDC	2.76876e-11	0.314087	0.517	0.35	5.53753e-08	5	NUDC
KIFC1	2.84095e-47	0.314059	0.529	0.271	5.68189e-44	5	KIFC1
MRPL17	0.0045407	0.311188	0.449	0.322	1	5	MRPL17
C1QBP	1.19542e-135	0.310821	0.809	0.552	2.39083e-132	5	C1QBP
CSE1L	1.59832e-06	0.309206	0.426	0.272	0.00319665	5	CSE1L
ATPIF1	1.50333e-49	0.306387	0.793	0.507	3.00666e-46	5	ATPIF1
CCDC34	5.94805e-59	0.305429	0.536	0.261	1.18961e-55	5	CCDC34
XRCC6	8.69004e-88	0.303669	0.66	0.356	1.73801e-84	5	XRCC6
RPS29	3.43782e-79	0.303464	0.997	0.953	6.87564e-76	5	RPS29
BEX3	4.25294e-193	0.296192	0.8	0.477	8.50588e-190	5	BEX3
ADK	1.45749e-84	0.295846	0.605	0.307	2.91497e-81	5	ADK
HSP90AA1	6.6657e-52	0.295464	0.84	0.602	1.33314e-48	5	HSP90AA1
TIMM21	8.72688e-37	0.294604	0.514	0.276	1.74538e-33	5	TIMM21
PPIB	8.72211e-72	0.294351	0.8	0.532	1.74442e-68	5	PPIB
HDDC2	1.66947e-84	0.292061	0.658	0.404	3.33895e-81	5	HDDC2
TUBG1	2.81587e-32	0.290883	0.519	0.288	5.63174e-29	5	TUBG1
ESD	4.16291e-14	0.290652	0.62	0.47	8.32581e-11	5	ESD
RP11-543P15.1	2.77885e-46	0.287786	0.714	0.454	5.5577e-43	5	RP11-543P15.1
PPIG	4.51907e-123	0.287639	0.719	0.408	9.03814e-120	5	PPIG
RANGRF	2.16871e-19	0.286961	0.519	0.336	4.33743e-16	5	RANGRF
KNSTRN	6.1357e-71	0.286925	0.538	0.234	1.22714e-67	5	KNSTRN
SEC13	3.13337e-23	0.286777	0.61	0.442	6.26675e-20	5	SEC13
KIF11	4.87981e-149	0.286286	0.677	0.382	9.75962e-146	5	KIF11
PAFAH1B3	3.51433e-49	0.285779	0.641	0.435	7.02867e-46	5	PAFAH1B3
POLE3	1.67107e-40	0.284788	0.542	0.307	3.34214e-37	5	POLE3
PRC1	2.58444e-182	0.284749	0.675	0.332	5.16887e-179	5	PRC1
RPS3AP6	1.3948e-91	0.281359	0.753	0.489	2.78961e-88	5	RPS3AP6
BUB1B	6.55224e-69	0.28104	0.611	0.384	1.31045e-65	5	BUB1B
CCNA2	5.63828e-12	0.280856	0.425	0.225	1.12766e-08	5	CCNA2
SAE1	0.000150433	0.28085	0.441	0.301	0.300866	5	SAE1
RFC5	3.35474e-64	0.280669	0.578	0.326	6.70948e-61	5	RFC5
RPS27AP16	1.18816e-184	0.277727	0.821	0.557	2.37632e-181	5	RPS27AP16
FANCL	5.55592e-29	0.277055	0.553	0.356	1.11118e-25	5	FANCL
RP11-761N21.2	4.95887e-81	0.276684	0.681	0.385	9.91774e-78	5	RP11-761N21.2
TPGS2	6.18422e-85	0.274966	0.597	0.302	1.23684e-81	5	TPGS2
AKR1C3	7.37775e-10	0.271594	0.353	0.321	1.47555e-06	5	AKR1C3
RPS18	6.40059e-73	0.270493	1	0.981	1.28012e-69	5	RPS18
MRPL24	0.000122152	0.270436	0.493	0.356	0.244304	5	MRPL24
SNRNP35	1.12466e-22	0.269234	0.473	0.262	2.24931e-19	5	SNRNP35
HLA-DPB1	1.90051e-26	0.267091	0.816	0.641	3.80102e-23	5	HLA-DPB1
FADS2	1.17031e-188	0.266888	0.778	0.544	2.34061e-185	5	FADS2
HSPA5	4.6895e-21	0.266301	0.587	0.373	9.379e-18	5	HSPA5
METTL5	2.50125e-29	0.265145	0.584	0.381	5.0025e-26	5	METTL5
CD74	1.76169e-59	0.263539	0.989	0.906	3.52338e-56	5	CD74
EEF1B2P3	1.55204e-221	0.262626	0.779	0.488	3.10407e-218	5	EEF1B2P3
MZT1	9.65541e-44	0.261774	0.602	0.403	1.93108e-40	5	MZT1
SDHD	1.5076e-131	0.261368	0.698	0.377	3.01519e-128	5	SDHD
RACGAP1	1.16323e-38	0.259893	0.473	0.202	2.32646e-35	5	RACGAP1
MT2A	2.49479e-15	0.259774	0.592	0.424	4.98957e-12	5	MT2A
SLC29A1	5.86583e-134	0.256588	0.64	0.323	1.17317e-130	5	SLC29A1
REXO2	1.477e-21	0.251183	0.555	0.394	2.95401e-18	5	REXO2
SUCLG1	2.54714e-14	0.250613	0.639	0.493	5.09428e-11	5	SUCLG1
DEFA3	0	1.93195	0.965	0.739	0	6	DEFA3		Neutrophil A
DEFA4	0	1.81483	0.955	0.67	0	6	DEFA4
SLPI	1.07642e-201	1.54278	0.812	0.548	2.15285e-198	6	SLPI
CD24	4.25697e-157	1.46643	0.769	0.489	8.51394e-154	6	CD24
BPI	1.02119e-237	1.44048	0.818	0.463	2.04238e-234	6	BPI
RNASE3	9.70128e-129	1.28054	0.841	0.61	1.94026e-125	6	RNASE3
CEACAM8	1.46065e-59	1.19585	0.692	0.515	2.9213e-56	6	CEACAM8
RETN	7.34882e-166	1.14564	0.99	0.825	1.46976e-162	6	RETN
S100P	3.00103e-166	1.13959	0.878	0.633	6.00206e-163	6	S100P
CEACAM6	4.67822e-12	1.10315	0.498	0.316	9.35643e-09	6	CEACAM6
TSPO	1.24639e-209	1.06368	0.956	0.702	2.49279e-206	6	TSPO
RNASE2	7.18976e-138	0.975534	0.914	0.77	1.43795e-134	6	RNASE2
MS4A3	2.72151e-127	0.917661	0.809	0.572	5.44303e-124	6	MS4A3
ANXA3	5.98906e-20	0.91746	0.592	0.478	1.19781e-16	6	ANXA3
DPY19L1P1	9.63538e-219	0.889167	0.779	0.515	1.92708e-215	6	DPY19L1P1
RGL4	9.67855e-11	0.864746	0.556	0.451	1.93571e-07	6	RGL4
DEFA8P	6.28319e-50	0.847292	0.271	0.291	1.25664e-46	6	DEFA8P
OLFM4	1.51321e-131	0.811112	0.76	0.48	3.02641e-128	6	OLFM4
COL17A1	5.09225e-07	0.778185	0.366	0.3	0.00101845	6	COL17A1
TCN1	1.47833e-240	0.75752	0.783	0.439	2.95666e-237	6	TCN1
CYSTM1	2.25091e-134	0.757298	0.844	0.57	4.50182e-131	6	CYSTM1
S100A8	4.79657e-295	0.753629	1	0.997	9.59314e-292	6	S100A8
SRGN	7.95324e-191	0.748449	0.996	0.944	1.59065e-187	6	SRGN
ALOX5AP	2.24063e-50	0.722323	0.743	0.6	4.48126e-47	6	ALOX5AP
FAM107B	4.9908e-19	0.647007	0.334	0.334	9.9816e-16	6	FAM107B
CDA	4.29696e-173	0.610819	0.83	0.576	8.59393e-170	6	CDA
CPNE3	7.89995e-19	0.600026	0.355	0.387	1.57999e-15	6	CPNE3
S100A9	2.81086e-195	0.595587	1	0.999	5.62173e-192	6	S100A9
GGTA1P	8.81373e-05	0.564205	0.438	0.283	0.176275	6	GGTA1P
LYZ	2.25485e-147	0.547373	1	0.989	4.5097e-144	6	LYZ
FAM101B	4.93448e-17	0.536165	0.351	0.374	9.86896e-14	6	FAM101B
FAR2	7.9554e-80	0.529926	0.614	0.379	1.59108e-76	6	FAR2
MNDA	4.02336e-18	0.516955	0.654	0.596	8.04672e-15	6	MNDA
ALAS1	3.79291e-61	0.505433	0.618	0.381	7.58581e-58	6	ALAS1
ELANE	4.98488e-92	0.502988	0.961	0.891	9.96975e-89	6	ELANE
HMGN2	2.29067e-44	0.497804	0.856	0.637	4.58133e-41	6	HMGN2
TMSB4XP4	1.26891e-40	0.497798	0.588	0.348	2.53783e-37	6	TMSB4XP4
MSRB1	9.55138e-59	0.494576	0.725	0.531	1.91028e-55	6	MSRB1
GCA	1.50195e-50	0.491709	0.743	0.497	3.00391e-47	6	GCA
B4GALT5	3.16702e-33	0.482186	0.258	0.258	6.33404e-30	6	B4GALT5
GLRX	2.5218e-12	0.463462	0.679	0.559	5.0436e-09	6	GLRX
CSTA	1.79979e-21	0.460411	0.86	0.719	3.59957e-18	6	CSTA
UGCG	4.7284e-42	0.457713	0.283	0.307	9.45679e-39	6	UGCG
TMSB4X	3.18526e-127	0.449346	1	0.991	6.37051e-124	6	TMSB4X
MCEMP1	4.94745e-150	0.447139	0.82	0.548	9.89491e-147	6	MCEMP1
SLC15A4	5.25817e-43	0.436597	0.491	0.221	1.05163e-39	6	SLC15A4
TUBA4A	1.08712e-22	0.435756	0.652	0.505	2.17423e-19	6	TUBA4A
MARCKS	4.02396e-17	0.406798	0.345	0.345	8.04791e-14	6	MARCKS
CYP4F3	1.08856e-16	0.405511	0.404	0.447	2.17712e-13	6	CYP4F3
AIG1	3.17098e-13	0.404517	0.36	0.34	6.34196e-10	6	AIG1
MMP8	0.000480664	0.386657	0.54	0.464	0.961329	6	MMP8
LCN2	1.56454e-27	0.381539	0.885	0.747	3.12907e-24	6	LCN2
AZI2	3.67744e-21	0.376035	0.586	0.411	7.35487e-18	6	AZI2
RP11-1143G9.4	1.18049e-40	0.375651	0.842	0.634	2.36098e-37	6	RP11-1143G9.4
CHI3L1	1.02696e-46	0.3639	0.634	0.45	2.05392e-43	6	CHI3L1
TOP2A	4.37815e-64	0.363641	0.206	0.275	8.7563e-61	6	TOP2A
RRM2	8.42605e-08	0.354297	0.422	0.403	0.000168521	6	RRM2
CEACAM1	4.85411e-29	0.350504	0.58	0.388	9.70823e-26	6	CEACAM1
PCNA	3.32243e-06	0.338693	0.44	0.281	0.00664486	6	PCNA
SLC28A3	4.24722e-125	0.338062	0.704	0.447	8.49444e-122	6	SLC28A3
IER3	2.91251e-190	0.321826	0.746	0.481	5.82502e-187	6	IER3
PGLYRP1	6.39842e-52	0.314235	0.915	0.741	1.27968e-48	6	PGLYRP1
SVIP	0.000603697	0.310076	0.35	0.276	1	6	SVIP
DEK	1.43554e-12	0.309286	0.394	0.401	2.87108e-09	6	DEK
DMXL2	4.17168e-23	0.304806	0.547	0.36	8.34336e-20	6	DMXL2
ARG1	4.65488e-10	0.301646	0.58	0.478	9.30977e-07	6	ARG1
TSPAN2	1.72464e-124	0.285202	0.699	0.441	3.44927e-121	6	TSPAN2
SLC40A1	3.90295e-116	0.283176	0.171	0.289	7.80591e-113	6	SLC40A1
CRISP3	5.97734e-106	0.280549	0.124	0.203	1.19547e-102	6	CRISP3
FCN1	8.96765e-45	0.279168	0.895	0.714	1.79353e-41	6	FCN1
CORO2A	5.64024e-06	0.265964	0.32	0.307	0.0112805	6	CORO2A
P2RY13	3.10122e-29	0.263738	0.582	0.397	6.20245e-26	6	P2RY13
H1F0	1.59002e-62	0.254872	0.301	0.409	3.18004e-59	6	H1F0
IFI44L	7.69365e-105	0.254659	0.108	0.206	1.53873e-101	6	IFI44L
CTSG	0	2.05444	0.971	0.597	0	7	CTSG		Neutrophil B
ELANE	0	1.622	1	0.889	0	7	ELANE
PRTN3	0	1.52032	0.997	0.873	0	7	PRTN3
CST7	0	1.35973	0.981	0.714	0	7	CST7
AZU1	4.98577e-307	1.2654	0.993	0.768	9.97155e-304	7	AZU1
SRGN	0	1.24515	0.999	0.944	0	7	SRGN
RNASE3	1.3231e-146	1.12298	0.823	0.613	2.64621e-143	7	RNASE3
MS4A3	5.76898e-190	1.04286	0.884	0.57	1.1538e-186	7	MS4A3
RNASE2	3.38132e-181	1.03129	0.959	0.768	6.76265e-178	7	RNASE2
DEFB1	8.25909e-30	0.977847	0.633	0.508	1.65182e-26	7	DEFB1
P4HB	5.25051e-81	0.939237	0.732	0.487	1.0501e-77	7	P4HB
NUCB2	1.0088e-135	0.769758	0.933	0.615	2.0176e-132	7	NUCB2
RETN	1.31445e-108	0.762483	0.971	0.828	2.6289e-105	7	RETN
PLAC8	1.0396e-132	0.761419	0.942	0.735	2.07921e-129	7	PLAC8
RP11-84C10.2	4.9259e-09	0.758636	0.511	0.436	9.85179e-06	7	RP11-84C10.2
RGL4	1.2656e-42	0.690068	0.623	0.448	2.5312e-39	7	RGL4
AIG1	1.70098e-32	0.636232	0.522	0.329	3.40195e-29	7	AIG1
CLU	3.35933e-151	0.622659	0.791	0.551	6.71866e-148	7	CLU
CSTA	2.53832e-60	0.60837	0.866	0.72	5.07665e-57	7	CSTA
MYDGF	1.77668e-118	0.605522	0.778	0.409	3.55335e-115	7	MYDGF
S100P	2.00974e-70	0.580408	0.81	0.64	4.01947e-67	7	S100P
CEACAM6	5.93532e-24	0.57337	0.506	0.317	1.18706e-20	7	CEACAM6
DEFA8P	0.00181625	0.568204	0.344	0.286	1	7	DEFA8P
HSPA5	2.24724e-24	0.521131	0.597	0.375	4.49447e-21	7	HSPA5
MPO	3.61769e-120	0.481319	0.996	0.961	7.23539e-117	7	MPO
DEFA4	1.60911e-39	0.477529	0.816	0.682	3.21821e-36	7	DEFA4
CITED2	9.98417e-29	0.467096	0.507	0.299	1.99683e-25	7	CITED2
CHCHD7	4.03928e-24	0.463436	0.533	0.331	8.07857e-21	7	CHCHD7
LYZ	5.28824e-71	0.44697	1	0.989	1.05765e-67	7	LYZ
IDI1	1.92294e-27	0.435201	0.526	0.323	3.84587e-24	7	IDI1
PPIB	2.75105e-14	0.435039	0.651	0.546	5.5021e-11	7	PPIB
TSPO	8.96141e-72	0.420976	0.902	0.708	1.79228e-68	7	TSPO
ALAS1	1.38128e-47	0.415345	0.567	0.387	2.76257e-44	7	ALAS1
TMSB4X	3.42216e-116	0.388191	1	0.991	6.84432e-113	7	TMSB4X
SDF2L1	2.69321e-08	0.386279	0.455	0.321	5.38641e-05	7	SDF2L1
IGFBP7	4.25902e-67	0.379776	0.715	0.398	8.51804e-64	7	IGFBP7
HSP90B1	1.38774e-14	0.379752	0.542	0.327	2.77547e-11	7	HSP90B1
DMXL2	1.96582e-84	0.377282	0.605	0.358	3.93164e-81	7	DMXL2
CALR	6.56165e-37	0.368999	0.802	0.589	1.31233e-33	7	CALR
PDIA6	7.7887e-07	0.365322	0.452	0.264	0.00155774	7	PDIA6
EEF1B2	1.43094e-29	0.363008	0.915	0.746	2.86187e-26	7	EEF1B2
PPIA	2.93956e-38	0.352843	0.943	0.737	5.87912e-35	7	PPIA
GGTA1P	0.00112089	0.347626	0.349	0.291	1	7	GGTA1P
FAM107B	4.18144e-05	0.347128	0.361	0.333	0.0836288	7	FAM107B
BEX1	2.83352e-25	0.334435	0.174	0.129	5.66704e-22	7	BEX1
GLRX	8.84979e-19	0.326742	0.688	0.56	1.76996e-15	7	GLRX
COX8A	6.18927e-28	0.315276	0.751	0.572	1.23785e-24	7	COX8A
ROGDI	4.5377e-104	0.301728	0.726	0.491	9.0754e-101	7	ROGDI
TMSB4XP4	7.93388e-30	0.297579	0.567	0.352	1.58678e-26	7	TMSB4XP4
SMIM10	7.91371e-07	0.280603	0.508	0.421	0.00158274	7	SMIM10
RPL41	7.7614e-21	0.260913	0.946	0.796	1.55228e-17	7	RPL41
YBX1	4.33461e-22	0.254433	0.612	0.426	8.66922e-19	7	YBX1
MANF	4.91411e-05	0.250558	0.45	0.322	0.0982821	7	MANF
AHSP	3.01131e-277	2.78461	0.992	0.575	6.02262e-274	8	AHSP		Erythroid cell
HBA1	4.41717e-203	2.7117	0.984	0.814	8.83434e-200	8	HBA1
HBA2	4.24675e-158	2.70898	0.964	0.84	8.4935e-155	8	HBA2
HBD	5.92655e-211	2.61691	0.956	0.471	1.18531e-207	8	HBD
HBB	2.20016e-248	2.61319	1	0.929	4.40032e-245	8	HBB
HBG2	3.32448e-146	2.51452	0.897	0.664	6.64896e-143	8	HBG2
PRDX2	4.5676e-276	2.48899	0.974	0.493	9.1352e-273	8	PRDX2
BLVRB	8.34609e-219	2.26117	0.941	0.617	1.66922e-215	8	BLVRB
SLC4A1	1.04126e-210	2.23125	0.869	0.42	2.08253e-207	8	SLC4A1
ALAS2	1.17754e-168	2.17186	0.826	0.453	2.35508e-165	8	ALAS2
GYPA	1.58145e-91	2.06627	0.701	0.279	3.16291e-88	8	GYPA
GYPB	2.02298e-67	1.95167	0.677	0.363	4.04597e-64	8	GYPB
FAM178B	5.33936e-207	1.65351	0.867	0.509	1.06787e-203	8	FAM178B
APOC1	7.936e-58	1.52651	0.701	0.467	1.5872e-54	8	APOC1
TMEM14B	2.14965e-93	1.48142	0.788	0.479	4.29931e-90	8	TMEM14B
SLC25A37	2.32498e-76	1.47152	0.768	0.515	4.64996e-73	8	SLC25A37
HMBS	4.15286e-88	1.46785	0.711	0.32	8.30572e-85	8	HMBS
TMEM14C	3.58739e-139	1.39463	0.883	0.497	7.17478e-136	8	TMEM14C
CD36	2.15017e-54	1.36856	0.663	0.385	4.30034e-51	8	CD36
HBM	3.44383e-57	1.30057	0.634	0.186	6.88766e-54	8	HBM
UROD	2.82521e-72	1.27523	0.733	0.348	5.65042e-69	8	UROD
MYL4	5.24348e-111	1.2061	0.747	0.429	1.0487e-107	8	MYL4
SMIM1	9.75784e-57	1.18045	0.638	0.313	1.95157e-53	8	SMIM1
HEMGN	3.75838e-17	1.16456	0.511	0.151	7.51676e-14	8	HEMGN
MGST3	2.32866e-56	1.11491	0.733	0.463	4.65732e-53	8	MGST3
HBQ1	8.75657e-140	1.11264	0.743	0.34	1.75131e-136	8	HBQ1
SLC25A39	4.7445e-22	1.08508	0.586	0.352	9.48899e-19	8	SLC25A39
KLF1	8.09465e-160	1.05209	0.776	0.363	1.61893e-156	8	KLF1
REXO2	1.01897e-56	1.00129	0.689	0.397	2.03795e-53	8	REXO2
RFESD	2.18376e-05	0.986383	0.453	0.172	0.0436752	8	RFESD
TFRC	1.97508e-26	0.97895	0.596	0.33	3.95016e-23	8	TFRC
MPC2	2.35712e-57	0.974679	0.798	0.548	4.71425e-54	8	MPC2
RHAG	0.00184951	0.957293	0.358	0.153	1	8	RHAG
PTTG1	4.23686e-44	0.93959	0.663	0.337	8.47373e-41	8	PTTG1
GYPC	1.34837e-81	0.937823	0.889	0.508	2.69675e-78	8	GYPC
SELENBP1	3.95836e-05	0.936477	0.459	0.231	0.0791671	8	SELENBP1
CA2	1.11202e-31	0.924782	0.545	0.226	2.22404e-28	8	CA2
KIAA0101	5.79802e-44	0.924108	0.693	0.418	1.1596e-40	8	KIAA0101
FECH	1.76293e-28	0.922067	0.6	0.397	3.52586e-25	8	FECH
HAGH	1.87406e-118	0.894441	0.762	0.436	3.74812e-115	8	HAGH
UBAC1	1.95043e-22	0.892864	0.566	0.351	3.90087e-19	8	UBAC1
METAP2	4.43124e-23	0.88791	0.614	0.39	8.86247e-20	8	METAP2
ATPIF1	2.7353e-66	0.877746	0.851	0.518	5.4706e-63	8	ATPIF1
SNCA	6.33715e-22	0.866858	0.535	0.29	1.26743e-18	8	SNCA
NARF	1.5717e-120	0.855771	0.752	0.309	3.14339e-117	8	NARF
DNAJA4	1.19435e-44	0.849952	0.6	0.308	2.3887e-41	8	DNAJA4
GFI1B	6.59377e-41	0.838069	0.626	0.395	1.31875e-37	8	GFI1B
TSTA3	2.77629e-93	0.837733	0.749	0.449	5.55257e-90	8	TSTA3
BLVRA	9.58067e-21	0.829745	0.533	0.243	1.91613e-17	8	BLVRA
ARL6IP1	1.81614e-53	0.82505	0.642	0.245	3.63227e-50	8	ARL6IP1
CNRIP1	1.0749e-92	0.825045	0.76	0.47	2.1498e-89	8	CNRIP1
ANK1	1.08102e-52	0.821079	0.592	0.189	2.16203e-49	8	ANK1
TUBG1	1.86949e-52	0.809509	0.624	0.295	3.73898e-49	8	TUBG1
STRADB	4.187e-61	0.807364	0.63	0.301	8.374e-58	8	STRADB
TUBB	3.26268e-57	0.806256	0.832	0.497	6.52535e-54	8	TUBB
HMGB2	7.24316e-53	0.805005	0.808	0.577	1.44863e-49	8	HMGB2
SOD1	2.37734e-46	0.80041	0.715	0.383	4.75468e-43	8	SOD1
EPB42	0.000103447	0.797663	0.428	0.126	0.206894	8	EPB42
ALAD	5.96176e-25	0.785501	0.636	0.468	1.19235e-21	8	ALAD
LGALS3	4.32049e-118	0.781272	0.848	0.565	8.64098e-115	8	LGALS3
SLC2A1	9.95929e-204	0.750466	0.792	0.291	1.99186e-200	8	SLC2A1
RAN	1.48027e-41	0.746631	0.733	0.425	2.96055e-38	8	RAN
HEBP1	4.15216e-12	0.746194	0.604	0.525	8.30432e-09	8	HEBP1
MINPP1	9.62643e-19	0.738931	0.535	0.295	1.92529e-15	8	MINPP1
BOLA3	0.000102542	0.738603	0.467	0.285	0.205084	8	BOLA3
CDK1	5.83796e-17	0.72863	0.501	0.236	1.16759e-13	8	CDK1
TUBB4B	9.14412e-126	0.728059	0.832	0.441	1.82882e-122	8	TUBB4B
TPGS2	1.36463e-109	0.722226	0.747	0.31	2.72926e-106	8	TPGS2
LMNA	7.62937e-78	0.716364	0.632	0.242	1.52587e-74	8	LMNA
KCNH2	2.229e-57	0.714596	0.659	0.427	4.45799e-54	8	KCNH2
FTH1	3.03133e-75	0.707155	0.97	0.856	6.06267e-72	8	FTH1
TSC22D1	2.18824e-52	0.705219	0.622	0.294	4.37648e-49	8	TSC22D1
GYPE	5.12293e-69	0.698264	0.624	0.272	1.02459e-65	8	GYPE
CYB5A	0.000697119	0.693639	0.483	0.364	1	8	CYB5A
CCNB2	1.02909e-12	0.691213	0.515	0.298	2.05818e-09	8	CCNB2
EIF2AK1	3.84289e-36	0.690796	0.588	0.312	7.68578e-33	8	EIF2AK1
RAD23A	1.53058e-09	0.686883	0.543	0.374	3.06117e-06	8	RAD23A
PA2G4	1.1745e-109	0.68658	0.82	0.364	2.349e-106	8	PA2G4
SMIM5	1.90077e-76	0.684836	0.651	0.284	3.80155e-73	8	SMIM5
RRM2	1.22685e-77	0.68423	0.715	0.394	2.45371e-74	8	RRM2
HSPA8	4.85562e-47	0.684157	0.822	0.561	9.71124e-44	8	HSPA8
CPOX	1.04685e-62	0.681452	0.606	0.234	2.09369e-59	8	CPOX
LXN	5.37056e-19	0.678818	0.638	0.459	1.07411e-15	8	LXN
NUSAP1	3.92788e-09	0.677075	0.495	0.273	7.85577e-06	8	NUSAP1
UBE2T	0.000155199	0.663731	0.477	0.322	0.310398	8	UBE2T
NOP16	1.3681e-64	0.663266	0.725	0.426	2.7362e-61	8	NOP16
DHFR	1.52051e-30	0.661084	0.596	0.361	3.04102e-27	8	DHFR
ATP5G1	1.19146e-10	0.660061	0.586	0.403	2.38292e-07	8	ATP5G1
LINC01133	0.000193153	0.658958	0.362	0.249	0.386307	8	LINC01133
HMGA1	1.88197e-99	0.645791	0.844	0.471	3.76394e-96	8	HMGA1
NME4	1.86167e-30	0.640133	0.622	0.349	3.72334e-27	8	NME4
HSP90AA1	1.19754e-22	0.636551	0.772	0.614	2.39507e-19	8	HSP90AA1
PCNA	3.54997e-15	0.629594	0.558	0.284	7.09995e-12	8	PCNA
GLRX5	8.6782e-41	0.625517	0.63	0.379	1.73564e-37	8	GLRX5
HSPE1	1.2853e-16	0.622577	0.636	0.395	2.5706e-13	8	HSPE1
MRPS9	1.26543e-15	0.607917	0.321	0.368	2.53087e-12	8	MRPS9
BIRC5	2.09395e-35	0.606914	0.606	0.362	4.1879e-32	8	BIRC5
HBG1	1.71548e-169	0.603934	0.788	0.442	3.43096e-166	8	HBG1
ASF1A	1.34913e-65	0.597001	0.661	0.297	2.69825e-62	8	ASF1A
PPA2	4.61035e-69	0.596794	0.743	0.429	9.22071e-66	8	PPA2
FADS2	1.36795e-131	0.583288	0.824	0.553	2.7359e-128	8	FADS2
CDKN3	0.000356765	0.578989	0.388	0.355	0.71353	8	CDKN3
RFC4	3.52417e-09	0.578619	0.511	0.324	7.04834e-06	8	RFC4
CCNB1	8.74711e-07	0.573233	0.362	0.343	0.00174942	8	CCNB1
AQP1	1.15417e-09	0.566326	0.434	0.082	2.30834e-06	8	AQP1
CA1	1.2779e-43	0.56334	0.554	0.175	2.5558e-40	8	CA1
UCP2	5.80188e-25	0.549035	0.661	0.396	1.16038e-21	8	UCP2
CACYBP	1.08791e-06	0.547359	0.513	0.327	0.00217581	8	CACYBP
ARV1	1.27402e-27	0.542724	0.58	0.335	2.54804e-24	8	ARV1
CKS1B	9.3432e-09	0.523329	0.511	0.313	1.86864e-05	8	CKS1B
ZWINT	5.5872e-18	0.522219	0.539	0.292	1.11744e-14	8	ZWINT
RGS16	5.14966e-153	0.521959	0.762	0.364	1.02993e-149	8	RGS16
HTRA2	0.000431462	0.520161	0.453	0.267	0.862925	8	HTRA2
CTSE	0.00692371	0.518936	0.366	0.255	1	8	CTSE
SNRPB	8.01397e-30	0.518083	0.768	0.52	1.60279e-26	8	SNRPB
PSMG1	1.70538e-11	0.514176	0.57	0.398	3.41076e-08	8	PSMG1
UBE2C	0.00579853	0.513644	0.503	0.399	1	8	UBE2C
DNPH1	2.96415e-23	0.511003	0.644	0.472	5.9283e-20	8	DNPH1
HMGB1	1.32746e-32	0.510224	0.836	0.627	2.65493e-29	8	HMGB1
ABCB10	3.80102e-26	0.509652	0.588	0.407	7.60204e-23	8	ABCB10
BCCIP	4.28438e-07	0.505338	0.323	0.236	0.000856876	8	BCCIP
APOBEC3C	9.15651e-78	0.501657	0.786	0.442	1.8313e-74	8	APOBEC3C
PHB	1.01716e-28	0.49371	0.677	0.429	2.03432e-25	8	PHB
RBM38	1.50078e-93	0.492253	0.715	0.415	3.00155e-90	8	RBM38
NUTF2	5.8371e-16	0.482748	0.6	0.384	1.16742e-12	8	NUTF2
CENPW	1.34115e-06	0.482635	0.509	0.324	0.00268231	8	CENPW
PPDPF	8.13872e-25	0.480306	0.602	0.366	1.62774e-21	8	PPDPF
CKS2	7.13975e-10	0.478746	0.602	0.45	1.42795e-06	8	CKS2
HIST1H4C	2.83871e-11	0.478673	0.384	0.445	5.67742e-08	8	HIST1H4C
HK1	4.41097e-38	0.478513	0.62	0.38	8.82194e-35	8	HK1
HMGN5	4.79704e-16	0.47774	0.281	0.261	9.59408e-13	8	HMGN5
HSPD1	1.055e-23	0.469245	0.586	0.307	2.11001e-20	8	HSPD1
RNF5	2.10993e-17	0.46672	0.582	0.401	4.21986e-14	8	RNF5
ANP32B	1.70514e-32	0.46166	0.743	0.461	3.41028e-29	8	ANP32B
MRPS34	3.93703e-43	0.450067	0.665	0.378	7.87406e-40	8	MRPS34
DDX39A	5.32152e-06	0.445147	0.503	0.346	0.010643	8	DDX39A
CHAC2	6.27182e-14	0.443537	0.263	0.137	1.25436e-10	8	CHAC2
ATP5G3	1.42546e-15	0.440889	0.754	0.584	2.85093e-12	8	ATP5G3
CR1L	1.60326e-72	0.440251	0.604	0.192	3.20653e-69	8	CR1L
GDF15	1.08429e-143	0.438748	0.697	0.357	2.16859e-140	8	GDF15
CTSL	5.96021e-57	0.438133	0.638	0.394	1.19204e-53	8	CTSL
S100A6	1.358e-38	0.433396	0.897	0.707	2.71599e-35	8	S100A6
SLC29A1	8.01148e-05	0.42648	0.477	0.342	0.16023	8	SLC29A1
C19orf48	2.82299e-65	0.425438	0.717	0.377	5.64598e-62	8	C19orf48
AURKA	6.69627e-13	0.423328	0.545	0.392	1.33925e-09	8	AURKA
EIF5A	1.29612e-32	0.417946	0.713	0.487	2.59224e-29	8	EIF5A
SLC38A5	9.25277e-08	0.415999	0.505	0.344	0.000185055	8	SLC38A5
METTL5	7.82071e-07	0.414877	0.533	0.391	0.00156414	8	METTL5
RPS26	5.55104e-22	0.413531	0.844	0.664	1.11021e-18	8	RPS26
CCT2	2.20882e-26	0.41259	0.616	0.344	4.41764e-23	8	CCT2
RPA3	4.09688e-05	0.407815	0.531	0.35	0.0819376	8	RPA3
MIR144	1.03885e-33	0.405676	0.497	0.286	2.0777e-30	8	MIR144
TUBA1C	2.77922e-52	0.404086	0.693	0.372	5.55843e-49	8	TUBA1C
PAK1IP1	3.86063e-06	0.403001	0.386	0.402	0.00772125	8	PAK1IP1
ADD2	0.00417138	0.402974	0.398	0.371	1	8	ADD2
TSPAN17	5.69666e-14	0.394062	0.485	0.25	1.13933e-10	8	TSPAN17
ACKR1	1.23543e-24	0.39341	0.543	0.282	2.47085e-21	8	ACKR1
NUP37	0.00245664	0.391216	0.436	0.279	1	8	NUP37
H1F0	4.42786e-05	0.38748	0.384	0.402	0.0885571	8	H1F0
CYC1	4.45508e-18	0.381982	0.604	0.388	8.91017e-15	8	CYC1
SPTB	9.59785e-17	0.378489	0.497	0.217	1.91957e-13	8	SPTB
RUVBL2	7.96484e-43	0.377449	0.665	0.401	1.59297e-39	8	RUVBL2
NHP2	0.000199249	0.375402	0.59	0.487	0.398498	8	NHP2
SSSCA1	2.03644e-37	0.372364	0.655	0.396	4.07288e-34	8	SSSCA1
TUBA1B	3.42418e-20	0.370644	0.826	0.64	6.84836e-17	8	TUBA1B
NUF2	1.98753e-24	0.370184	0.283	0.264	3.97507e-21	8	NUF2
SRI	5.90321e-07	0.366556	0.543	0.305	0.00118064	8	SRI
EEF1B2	6.84992e-14	0.363975	0.907	0.751	1.36998e-10	8	EEF1B2
LRR1	2.89513e-23	0.357086	0.586	0.409	5.79026e-20	8	LRR1
HINT2	3.05654e-09	0.354527	0.539	0.37	6.11308e-06	8	HINT2
RPL41	7.17015e-16	0.35319	0.949	0.801	1.43403e-12	8	RPL41
BRIX1	0.00127005	0.352837	0.426	0.24	1	8	BRIX1
PRPS1	9.40977e-06	0.35281	0.509	0.371	0.0188195	8	PRPS1
LSM4	1.82531e-34	0.350941	0.671	0.394	3.65062e-31	8	LSM4
UCA1	6.26825e-157	0.349272	0.756	0.36	1.25365e-153	8	UCA1
DKC1	9.54933e-45	0.349238	0.578	0.232	1.90987e-41	8	DKC1
MRPL14	0.0045872	0.347693	0.416	0.4	1	8	MRPL14
DMTN	3.55848e-80	0.345993	0.622	0.234	7.11697e-77	8	DMTN
SDHD	0.00351777	0.344297	0.402	0.4	1	8	SDHD
MLLT3	5.45632e-52	0.343593	0.586	0.237	1.09126e-48	8	MLLT3
GLRX	3.00421e-19	0.341504	0.749	0.562	6.00843e-16	8	GLRX
MRPS17	9.14826e-23	0.340639	0.572	0.353	1.82965e-19	8	MRPS17
TK1	2.32292e-06	0.340062	0.364	0.332	0.00464583	8	TK1
SPC25	3.81969e-10	0.339317	0.523	0.366	7.63939e-07	8	SPC25
RACGAP1	7.07137e-14	0.338107	0.283	0.22	1.41427e-10	8	RACGAP1
PPME1	7.76462e-102	0.337061	0.665	0.228	1.55292e-98	8	PPME1
XRCC6	1.42349e-55	0.334288	0.691	0.368	2.84698e-52	8	XRCC6
SLC1A5	4.37362e-72	0.330026	0.673	0.335	8.74723e-69	8	SLC1A5
KEL	1.8062e-143	0.329836	0.711	0.276	3.61239e-140	8	KEL
CENPN	0.00311047	0.32942	0.382	0.334	1	8	CENPN
CDK4	1.90693e-17	0.329372	0.614	0.418	3.81387e-14	8	CDK4
TSPO2	5.31243e-165	0.324877	0.719	0.294	1.06249e-161	8	TSPO2
SLC40A1	1.00886e-33	0.322325	0.549	0.272	2.01772e-30	8	SLC40A1
DUT	2.68053e-08	0.319615	0.545	0.325	5.36106e-05	8	DUT
TPM1	1.06843e-36	0.315877	0.291	0.424	2.13686e-33	8	TPM1
TMCC2	3.34006e-94	0.314732	0.434	0.076	6.68012e-91	8	TMCC2
KPNA2	7.94002e-06	0.306565	0.354	0.337	0.01588	8	KPNA2
CCNA2	3.78971e-07	0.304758	0.453	0.233	0.000757943	8	CCNA2
MCM2	4.92053e-115	0.303527	0.762	0.404	9.84107e-112	8	MCM2
PBK	2.10728e-35	0.302983	0.261	0.279	4.21456e-32	8	PBK
CDCA3	8.42336e-38	0.302729	0.248	0.335	1.68467e-34	8	CDCA3
MAP2K3	4.50322e-66	0.302354	0.719	0.465	9.00645e-63	8	MAP2K3
PRKAB1	3.45243e-06	0.300962	0.556	0.43	0.00690485	8	PRKAB1
POLE2	4.65493e-08	0.299353	0.503	0.332	9.30987e-05	8	POLE2
MTHFD1	1.75985e-44	0.297799	0.624	0.329	3.5197e-41	8	MTHFD1
TMEM14A	1.00831e-12	0.295754	0.275	0.271	2.01661e-09	8	TMEM14A
IFI27	5.36613e-08	0.294729	0.42	0.148	0.000107323	8	IFI27
SLIRP	3.16666e-09	0.293286	0.636	0.398	6.33332e-06	8	SLIRP
PAFAH1B3	6.11511e-25	0.290561	0.614	0.445	1.22302e-21	8	PAFAH1B3
EBNA1BP2	3.01323e-14	0.289541	0.289	0.295	6.02647e-11	8	EBNA1BP2
RPF2	2.11673e-08	0.288131	0.319	0.315	4.23347e-05	8	RPF2
MZT1	7.96201e-18	0.284197	0.574	0.413	1.5924e-14	8	MZT1
PPT2	3.54741e-08	0.28283	0.537	0.419	7.09482e-05	8	PPT2
KIAA1586	2.08214e-38	0.28092	0.202	0.269	4.16429e-35	8	KIAA1586
TSPAN13	0.00538584	0.279913	0.323	0.237	1	8	TSPAN13
OSBP2	1.97985e-171	0.274342	0.772	0.402	3.95969e-168	8	OSBP2
NCAPG	5.50178e-50	0.27434	0.64	0.365	1.10036e-46	8	NCAPG
PTMS	0.00133902	0.272552	0.382	0.316	1	8	PTMS
SPDL1	4.04244e-06	0.270126	0.412	0.168	0.00808489	8	SPDL1
GMPR	1.21446e-123	0.269893	0.697	0.273	2.42892e-120	8	GMPR
TMEM56	1.22691e-50	0.268245	0.162	0.072	2.45382e-47	8	TMEM56
NFIA	8.58928e-08	0.265795	0.299	0.105	0.000171786	8	NFIA
CALM2	5.12662e-15	0.264917	0.802	0.543	1.02532e-11	8	CALM2
PLK1	0.00253267	0.259799	0.457	0.292	1	8	PLK1
KIF2C	1.63409e-74	0.259211	0.707	0.419	3.26817e-71	8	KIF2C
COMMD4	1.03397e-06	0.253307	0.608	0.467	0.00206794	8	COMMD4
C9orf40	1.03884e-35	0.252174	0.543	0.232	2.07768e-32	8	C9orf40
YBX1	0.00220463	0.251285	0.564	0.433	1	8	YBX1
IGLC2	9.98956e-22	4.34781	0.683	0.331	1.99791e-18	9	IGLC2		B cell
IGHG1	3.46913e-24	4.10895	0.657	0.341	6.93827e-21	9	IGHG1
IGHA1	1.9823e-47	4.06962	0.737	0.323	3.96461e-44	9	IGHA1
IGHG3	3.13418e-20	3.94652	0.653	0.388	6.26836e-17	9	IGHG3
IGKC	4.07147e-106	3.75285	0.97	0.576	8.14293e-103	9	IGKC
IGLL5	9.37538e-176	3.02617	0.977	0.512	1.87508e-172	9	IGLL5
MZB1	3.45886e-123	2.83547	0.883	0.246	6.91771e-120	9	MZB1
IGHA2	3.23039e-39	2.79277	0.69	0.156	6.46079e-36	9	IGHA2
DERL3	6.36208e-121	2.54168	0.887	0.336	1.27242e-117	9	DERL3
HERPUD1	6.28658e-130	2.33069	0.917	0.326	1.25732e-126	9	HERPUD1
FKBP11	2.01505e-198	2.31754	0.967	0.37	4.0301e-195	9	FKBP11
IGKV4-1	7.53424e-307	2.27476	0.98	0.179	1.50685e-303	9	IGKV4-1
IGHG4	3.72442e-21	2.16452	0.71	0.485	7.44883e-18	9	IGHG4
IGLC7	1.46964e-62	2.13082	0.213	0.132	2.93928e-59	9	IGLC7
JCHAIN	0.00162466	2.05787	0.547	0.193	1	9	JCHAIN
XBP1	5.91029e-101	1.97776	0.92	0.299	1.18206e-97	9	XBP1
IGLV6-57	2.97423e-20	1.89048	0.34	0.157	5.94845e-17	9	IGLV6-57
ISG20	3.25493e-69	1.88208	0.78	0.257	6.50986e-66	9	ISG20
TNFRSF17	2.25892e-124	1.62413	0.85	0.145	4.51784e-121	9	TNFRSF17
IGKV1D-13	1.48659e-189	1.5821	0.973	0.497	2.97317e-186	9	IGKV1D-13
IGLV7-43	2.30584e-192	1.57685	0.94	0.419	4.61167e-189	9	IGLV7-43
IGLV1-44	1.59268e-181	1.56605	0.97	0.528	3.18536e-178	9	IGLV1-44
SEC11C	7.05171e-57	1.49698	0.787	0.393	1.41034e-53	9	SEC11C
PPIB	4.11919e-91	1.39633	0.977	0.544	8.23837e-88	9	PPIB
MANF	2.31524e-132	1.31652	0.95	0.318	4.63048e-129	9	MANF
HSP90B1	4.53018e-18	1.25888	0.68	0.334	9.06035e-15	9	HSP90B1
SELM	1.49824e-213	1.23146	0.97	0.157	2.99647e-210	9	SELM
SPCS3	0.000220389	1.19852	0.583	0.357	0.440777	9	SPCS3
FCRL5	0	1.02363	0.97	0.169	0	9	FCRL5
IGLV3-19	7.03867e-201	0.962974	0.96	0.408	1.40773e-197	9	IGLV3-19
PLPP5	1.21999e-11	0.948153	0.373	0.317	2.43999e-08	9	PLPP5
ITM2C	4.41321e-94	0.942782	0.98	0.549	8.82641e-91	9	ITM2C
SLAMF7	3.54779e-27	0.933143	0.31	0.086	7.09558e-24	9	SLAMF7
SUB1	1.3257e-24	0.92949	0.743	0.51	2.6514e-21	9	SUB1
PIM2	2.45565e-78	0.882973	0.797	0.273	4.91131e-75	9	PIM2
CD38	9.56255e-91	0.877134	0.9	0.317	1.91251e-87	9	CD38
IFI27	1.57642e-61	0.87642	0.173	0.156	3.15283e-58	9	IFI27
CD27	7.89539e-14	0.872772	0.613	0.252	1.57908e-10	9	CD27
SDF2L1	1.83075e-91	0.858378	0.92	0.318	3.66151e-88	9	SDF2L1
IGKV3-20	2.28319e-180	0.846663	0.897	0.154	4.56637e-177	9	IGKV3-20
GNL3	2.56412e-165	0.814948	0.967	0.332	5.12823e-162	9	GNL3
PDIA3	4.25059e-83	0.805591	0.97	0.459	8.50119e-80	9	PDIA3
TSC22D3	4.14372e-125	0.800496	0.917	0.274	8.28744e-122	9	TSC22D3
TXNDC15	0.00151265	0.798629	0.527	0.25	1	9	TXNDC15
PRDX4	0.00678967	0.793839	0.58	0.348	1	9	PRDX4
FAM92B	0	0.788826	0.927	0.156	0	9	FAM92B
IGLV3-1	1.16028e-209	0.770845	0.96	0.381	2.32055e-206	9	IGLV3-1
SCNN1B	0	0.76855	0.977	0.181	0	9	SCNN1B
RAB30	0	0.74711	0.953	0.166	0	9	RAB30
IGHV6-1	7.88546e-261	0.74626	0.867	0.2	1.57709e-257	9	IGHV6-1
LMO4	2.45507e-161	0.696026	0.967	0.412	4.91015e-158	9	LMO4
SVIP	4.12432e-83	0.668854	0.89	0.27	8.24864e-80	9	SVIP
VIMP	6.57755e-27	0.649942	0.307	0.253	1.31551e-23	9	VIMP
TPD52	2.98719e-50	0.618248	0.243	0.107	5.97438e-47	9	TPD52
DPEP1	2.71417e-227	0.617658	0.933	0.289	5.42834e-224	9	DPEP1
IGLV5-45	0	0.603222	0.94	0.173	0	9	IGLV5-45
CRISP3	5.61266e-30	0.591399	0.177	0.198	1.12253e-26	9	CRISP3
IGLV1-47	5.15582e-232	0.569807	0.97	0.161	1.03116e-228	9	IGLV1-47
MYDGF	1.10393e-05	0.537501	0.45	0.431	0.0220786	9	MYDGF
IGKV1-9	0	0.533566	0.97	0.172	0	9	IGKV1-9
CD79A	7.64166e-43	0.529923	0.693	0.235	1.52833e-39	9	CD79A
TMEM14A	8.65978e-162	0.507557	0.95	0.258	1.73196e-158	9	TMEM14A
IGHV2-5	0	0.503902	0.97	0.172	0	9	IGHV2-5
IGHV3-7	8.53828e-263	0.503828	0.937	0.26	1.70766e-259	9	IGHV3-7
TMSB4XP4	1.74638e-06	0.500156	0.42	0.364	0.00349276	9	TMSB4XP4
CAST	2.93409e-146	0.481321	0.943	0.308	5.86818e-143	9	CAST
PRDX2	4.37082e-14	0.475899	0.813	0.502	8.74165e-11	9	PRDX2
APOBEC3G	2.38746e-100	0.46695	0.853	0.274	4.77492e-97	9	APOBEC3G
SERPINI1	3.9871e-192	0.445283	0.963	0.359	7.97419e-189	9	SERPINI1
HIST1H4C	2.46577e-83	0.434386	0.903	0.435	4.93155e-80	9	HIST1H4C
IGLV5-48	0	0.434177	0.94	0.201	0	9	IGLV5-48
RP11-1143G9.4	1.32203e-69	0.427705	0.98	0.643	2.64406e-66	9	RP11-1143G9.4
FOLR3	4.50779e-42	0.420308	0.233	0.326	9.01558e-39	9	FOLR3
MDK	1.6055e-67	0.415165	0.777	0.292	3.21099e-64	9	MDK
SGPP1	3.34888e-217	0.40899	0.97	0.197	6.69775e-214	9	SGPP1
DRAP1	2.80894e-67	0.405636	0.897	0.446	5.61789e-64	9	DRAP1
NFKBIA	7.31354e-124	0.401163	0.97	0.524	1.46271e-120	9	NFKBIA
CRELD2	5.99654e-42	0.397332	0.243	0.239	1.19931e-38	9	CRELD2
SLIRP	1.53806e-12	0.396795	0.74	0.399	3.07611e-09	9	SLIRP
LSR	0	0.395727	0.937	0.176	0	9	LSR
SEC13	2.48118e-82	0.375127	0.907	0.446	4.96237e-79	9	SEC13
SPAG4	6.52956e-125	0.37338	0.12	0.153	1.30591e-121	9	SPAG4
BIRC3	1.43038e-113	0.372565	0.123	0.292	2.86075e-110	9	BIRC3
CTHRC1	1.83718e-282	0.371138	0.933	0.147	3.67436e-279	9	CTHRC1
PTP4A3	4.27652e-200	0.36936	0.94	0.282	8.55303e-197	9	PTP4A3
CD9	3.4389e-157	0.367805	0.927	0.155	6.87781e-154	9	CD9
PBK	6.07114e-147	0.357191	0.853	0.267	1.21423e-143	9	PBK
IGKJ1	3.2954e-16	0.355648	0.127	0.357	6.59079e-13	9	IGKJ1
IGHV3-49	4.63568e-186	0.355123	0.857	0.301	9.27136e-183	9	IGHV3-49
DUSP1	2.35084e-104	0.354505	0.98	0.485	4.70167e-101	9	DUSP1
IGHV1-69-2	0	0.343536	0.94	0.202	0	9	IGHV1-69-2
PPCDC	1.24362e-27	0.338435	0.35	0.393	2.48724e-24	9	PPCDC
IGKV1-13	0	0.330222	0.97	0.182	0	9	IGKV1-13
PELI1	2.82516e-179	0.330142	0.947	0.223	5.65033e-176	9	PELI1
JUNB	1.11609e-140	0.323339	0.973	0.537	2.23218e-137	9	JUNB
MIF	6.82797e-56	0.321829	0.99	0.662	1.36559e-52	9	MIF
WARS	0.00372777	0.320113	0.673	0.373	1	9	WARS
ALDH1L2	7.85759e-244	0.316237	0.94	0.16	1.57152e-240	9	ALDH1L2
B9D1	7.35293e-190	0.314592	0.927	0.171	1.47059e-186	9	B9D1
SGK1	0.000378587	0.289347	0.397	0.29	0.757174	9	SGK1
NFKBIZ	1.22271e-126	0.282614	0.93	0.466	2.44541e-123	9	NFKBIZ
SRP68	7.15065e-29	0.279335	0.843	0.295	1.43013e-25	9	SRP68
QPCT	2.4427e-07	0.274049	0.78	0.398	0.000488539	9	QPCT
C11orf24	3.38221e-48	0.27381	0.197	0.323	6.76441e-45	9	C11orf24
RGCC	5.42858e-85	0.267058	0.877	0.329	1.08572e-81	9	RGCC
B2M	3.46392e-19	0.263585	1	0.994	6.92784e-16	9	B2M
REXO2	1.5485e-95	0.258235	0.943	0.396	3.09699e-92	9	REXO2
CCL5	0.00143667	1.77286	0.594	0.411	1	10	CCL5		T cell
GZMA	2.12127e-18	1.76566	0.703	0.162	4.24253e-15	10	GZMA
CCL4	1.46991e-07	1.71115	0.594	0.101	0.000293983	10	CCL4
IL32	3.11577e-29	1.49063	0.752	0.057	6.23154e-26	10	IL32
CD52	4.37392e-17	1.44838	0.733	0.277	8.74783e-14	10	CD52
TRBC1	0.00160562	1.39455	0.564	0.245	1	10	TRBC1
CD3D	1.05381e-06	1.27964	0.594	0.132	0.00210762	10	CD3D
GIMAP4	2.1028e-10	1.27565	0.653	0.343	4.2056e-07	10	GIMAP4
C12orf75	7.69253e-05	1.06207	0.574	0.231	0.153851	10	C12orf75
RP11-543P15.1	4.36619e-22	1.05591	0.931	0.47	8.73237e-19	10	RP11-543P15.1
CCL3	1.34821e-05	1.02677	0.634	0.414	0.0269641	10	CCL3
CD69	2.96837e-30	0.943879	0.832	0.29	5.93673e-27	10	CD69
LGALS1	2.71099e-07	0.938066	0.901	0.771	0.000542197	10	LGALS1
EVL	5.30654e-12	0.876471	0.693	0.274	1.06131e-08	10	EVL
GZMK	2.09113e-14	0.843283	0.634	0.082	4.18226e-11	10	GZMK
BIRC3	9.66375e-25	0.809397	0.762	0.286	1.93275e-21	10	BIRC3
TRDC	2.87014e-20	0.806683	0.158	0.262	5.74029e-17	10	TRDC
CSTB	0.000779017	0.789331	0.743	0.484	1	10	CSTB
S100A10	4.17099e-17	0.775718	0.911	0.499	8.34198e-14	10	S100A10
LAIR2	2.52281e-30	0.764291	0.158	0.026	5.04562e-27	10	LAIR2
CCL4L2	1.01258e-05	0.755639	0.267	0.126	0.0202517	10	CCL4L2
BRIX1	2.84623e-05	0.734603	0.584	0.244	0.0569246	10	BRIX1
ANXA2	1.68261e-10	0.707056	0.752	0.378	3.36523e-07	10	ANXA2
EEF1B2	6.23448e-07	0.672487	0.95	0.755	0.0012469	10	EEF1B2
LCK	6.6999e-07	0.672371	0.337	0.002	0.00133998	10	LCK
JUN	5.8715e-50	0.670829	0.97	0.544	1.1743e-46	10	JUN
COX8A	3.71099e-09	0.667332	0.822	0.581	7.42198e-06	10	COX8A
ASF1A	1.22522e-24	0.654234	0.812	0.305	2.45044e-21	10	ASF1A
TRAC	2.70411e-13	0.629697	0.653	0.073	5.40822e-10	10	TRAC
MT-ATP8	6.68214e-21	0.580749	0.921	0.529	1.33643e-17	10	MT-ATP8
THAP9-AS1	2.78335e-25	0.576343	0.802	0.28	5.56669e-22	10	THAP9-AS1
KLRB1	3.83993e-131	0.570543	0.891	0.071	7.67985e-128	10	KLRB1
LTB	3.77515e-44	0.563626	0.871	0.269	7.5503e-41	10	LTB
RGS1	9.67776e-50	0.560042	0.901	0.392	1.93555e-46	10	RGS1
RPS25	9.47101e-07	0.549877	0.941	0.821	0.0018942	10	RPS25
UCP2	5.9935e-05	0.549579	0.673	0.402	0.11987	10	UCP2
MRPL24	1.04268e-21	0.545285	0.822	0.363	2.08536e-18	10	MRPL24
ECI2	7.6828e-25	0.530653	0.782	0.256	1.53656e-21	10	ECI2
HSPE1	5.67919e-06	0.529257	0.752	0.4	0.0113584	10	HSPE1
DBI	2.46414e-06	0.510126	0.792	0.623	0.00492827	10	DBI
FCGR3A	1.01462e-24	0.490921	0.188	0.313	2.02925e-21	10	FCGR3A
NUTF2	2.30508e-16	0.480885	0.832	0.388	4.61016e-13	10	NUTF2
GTSF1	4.46791e-12	0.47457	0.762	0.362	8.93583e-09	10	GTSF1
HSP90AA1	3.62031e-08	0.466933	0.871	0.618	7.24062e-05	10	HSP90AA1
H2AFZ	6.17536e-05	0.466661	0.772	0.651	0.123507	10	H2AFZ
RPS26	5.47508e-05	0.466021	0.931	0.667	0.109502	10	RPS26
CENPM	2.39351e-22	0.462268	0.842	0.431	4.78703e-19	10	CENPM
CCDC94	2.65619e-22	0.462002	0.792	0.363	5.31239e-19	10	CCDC94
RPL41	0.000807864	0.461555	0.921	0.805	1	10	RPL41
DIMT1	1.54172e-20	0.458638	0.772	0.364	3.08343e-17	10	DIMT1
SRI	0.000495817	0.455293	0.614	0.311	0.991634	10	SRI
GGH	4.32444e-18	0.454319	0.782	0.312	8.64888e-15	10	GGH
RP11-761N21.2	0.00162813	0.447549	0.644	0.405	1	10	RP11-761N21.2
CD27	1.10324e-12	0.445189	0.267	0.259	2.20649e-09	10	CD27
PPIA	0.00022712	0.436182	0.871	0.749	0.45424	10	PPIA
SPATA1	2.66582e-47	0.435805	0.871	0.354	5.33164e-44	10	SPATA1
TAF9	1.36072e-11	0.435728	0.752	0.297	2.72144e-08	10	TAF9
CALM2	0.0033539	0.430558	0.762	0.55	1	10	CALM2
EEF1B2P3	1.46659e-33	0.427721	0.911	0.507	2.93317e-30	10	EEF1B2P3
KIAA0101	4.20546e-05	0.421215	0.683	0.425	0.0841092	10	KIAA0101
KIF20B	1.4298e-10	0.410553	0.545	0.27	2.85961e-07	10	KIF20B
INIP	1.05935e-25	0.407569	0.802	0.302	2.1187e-22	10	INIP
CENPW	1.82265e-14	0.405115	0.782	0.326	3.64529e-11	10	CENPW
DUT	1.41079e-18	0.396985	0.851	0.328	2.82158e-15	10	DUT
MTATP6P1	2.38428e-13	0.391194	0.97	0.762	4.76857e-10	10	MTATP6P1
MT1X	6.90737e-15	0.387986	0.297	0.452	1.38147e-11	10	MT1X
NCAPG	0.000356502	0.373463	0.693	0.371	0.713003	10	NCAPG
FABP5	2.77446e-27	0.369337	0.941	0.572	5.54892e-24	10	FABP5
DNTT	6.93822e-13	0.364582	0.545	0.036	1.38764e-09	10	DNTT
CCDC82	1.86557e-11	0.362979	0.238	0.272	3.73114e-08	10	CCDC82
SRP9	0.000267008	0.359379	0.683	0.423	0.534015	10	SRP9
ELP4	2.38381e-10	0.354563	0.703	0.245	4.76763e-07	10	ELP4
PPDPF	1.08895e-36	0.346628	0.911	0.37	2.17789e-33	10	PPDPF
ITM2C	3.9906e-11	0.344429	0.861	0.555	7.9812e-08	10	ITM2C
CLEC11A	1.0969e-06	0.343714	0.802	0.458	0.00219381	10	CLEC11A
ZFP36	4.7365e-24	0.343708	0.891	0.519	9.47301e-21	10	ZFP36
CTD-2240J17.1	2.56391e-32	0.338832	0.792	0.22	5.12781e-29	10	CTD-2240J17.1
LDHB	0.00285645	0.333698	0.842	0.676	1	10	LDHB
TXNDC15	3.67144e-09	0.333659	0.248	0.255	7.34289e-06	10	TXNDC15
CCL3L3	1.32944e-36	0.330783	0.871	0.414	2.65887e-33	10	CCL3L3
SNCA	3.49661e-22	0.324816	0.822	0.294	6.99321e-19	10	SNCA
TGS1	2.05653e-24	0.320318	0.762	0.291	4.11306e-21	10	TGS1
MZT1	2.39163e-07	0.32022	0.337	0.418	0.000478327	10	MZT1
RUVBL2	5.11576e-05	0.317654	0.653	0.407	0.102315	10	RUVBL2
H2AFV	0.00432396	0.315408	0.584	0.265	1	10	H2AFV
C1orf54	3.24955e-09	0.3144	0.861	0.414	6.49911e-06	10	C1orf54
TAGLN2	0.000165161	0.314106	0.762	0.513	0.330323	10	TAGLN2
AURKB	1.40864e-19	0.314026	0.832	0.347	2.81727e-16	10	AURKB
RPL13AP25	2.68265e-20	0.313427	0.871	0.382	5.3653e-17	10	RPL13AP25
TMPO	1.76931e-29	0.312479	0.921	0.443	3.53862e-26	10	TMPO
UBE2T	7.53245e-24	0.312333	0.822	0.324	1.50649e-20	10	UBE2T
CSRP2	3.34449e-23	0.309751	0.703	0.157	6.68898e-20	10	CSRP2
RP11-234A1.1	5.49197e-08	0.307926	0.822	0.465	0.000109839	10	RP11-234A1.1
XBP1	0.000238148	0.299162	0.644	0.309	0.476296	10	XBP1
MAL	4.26936e-75	0.296658	0.901	0.087	8.53873e-72	10	MAL
ITK	1.0434e-06	0.296609	0.545	0.222	0.0020868	10	ITK
ADCY7	1.33048e-07	0.294123	0.287	0.324	0.000266096	10	ADCY7
MINPP1	9.00702e-09	0.292699	0.673	0.3	1.8014e-05	10	MINPP1
FGFR1OP2	4.19642e-06	0.290986	0.634	0.287	0.00839285	10	FGFR1OP2
RFC5	8.22112e-32	0.289191	0.119	0.346	1.64422e-28	10	RFC5
B2M	2.02362e-10	0.287382	1	0.994	4.04725e-07	10	B2M
ZNF346	4.26869e-34	0.287326	0.129	0.287	8.53739e-31	10	ZNF346
PPA2	0.000711902	0.284487	0.683	0.437	1	10	PPA2
PRKAB1	3.66438e-23	0.283192	0.861	0.431	7.32876e-20	10	PRKAB1
DRAP1	3.65953e-15	0.274803	0.891	0.451	7.31906e-12	10	DRAP1
LYSMD2	6.34472e-07	0.272533	0.693	0.401	0.00126894	10	LYSMD2
NFKBIA	1.06496e-26	0.272174	0.901	0.53	2.12992e-23	10	NFKBIA
NOTCH1	2.26782e-06	0.271029	0.594	0.307	0.00453565	10	NOTCH1
SAE1	6.19178e-40	0.265559	0.891	0.307	1.23836e-36	10	SAE1
CISD1	6.19639e-13	0.264659	0.297	0.431	1.23928e-09	10	CISD1
SPC25	3.95178e-24	0.264585	0.881	0.367	7.90356e-21	10	SPC25
RP11-386I14.4	6.79468e-11	0.263707	0.713	0.37	1.35894e-07	10	RP11-386I14.4
ARL4C	2.62438e-18	0.263568	0.257	0.078	5.24877e-15	10	ARL4C
CITED2	3.80766e-17	0.259429	0.782	0.309	7.61532e-14	10	CITED2
ISOC1	0.000170124	0.258908	0.416	0.425	0.340247	10	ISOC1
FAM216A	1.22046e-09	0.258267	0.782	0.401	2.44092e-06	10	FAM216A
PPP1R14A	9.06835e-11	0.257014	0.634	0.149	1.81367e-07	10	PPP1R14A
S100A4	0.00330224	0.256849	0.891	0.783	1	10	S100A4
ADK	1.60731e-08	0.256195	0.287	0.329	3.21462e-05	10	ADK
DST	1.57063e-43	0.254558	0.832	0.124	3.14125e-40	10	DST
NMT2	2.57308e-64	0.253443	0.871	0.238	5.14616e-61	10	NMT2
FADS2	9.37068e-38	0.252861	0.931	0.559	1.87414e-34	10	FADS2
PPCDC	3.53883e-09	0.252587	0.366	0.392	7.07766e-06	10	PPCDC
PLK1	0.0016634	0.251707	0.366	0.297	1	10	PLK1
CRYL1	2.08244e-33	0.251311	0.901	0.442	4.16488e-30	10	CRYL1

## Sheet: P04-Partial remission
Supplementary Table 9-4: Marker genes of P04 in UMAP pre and post regimen
	p_val	avg_logFC	pct.1	pct.2	p_val_adj	cluster	gene		cell type
LCN2	2.14292e-110	0.499336	0.637	0.714	4.28584e-107	1	LCN2		AML progenitor cell_nonspecificity
CFD	1.2482e-12	0.456298	0.552	0.747	2.4964e-09	1	CFD
HP	1.14434e-29	0.449882	0.377	0.662	2.28867e-26	1	HP
CD52	2.50101e-10	0.438496	0.457	0.606	5.00202e-07	1	CD52
PGLYRP1	5.66053e-214	0.416254	0.81	0.844	1.13211e-210	1	PGLYRP1
CD177	1.42839e-169	0.391078	0.233	0.603	2.85678e-166	1	CD177
LTB	3.85802e-207	0.37827	0.211	0.592	7.71604e-204	1	LTB
C10orf54	7.81707e-134	0.36525	0.283	0.644	1.56341e-130	1	C10orf54
CDA	1.72457e-53	0.363702	0.367	0.678	3.44914e-50	1	CDA
SERPINA1	6.39797e-155	0.348135	0.246	0.607	1.27959e-151	1	SERPINA1
CAMP	0	0.344503	0.975	0.915	0	1	CAMP
HBA1	0	0.310145	0.88	0.782	0	1	HBA1
GNLY	6.24789e-145	0.310043	0.174	0.516	1.24958e-141	1	GNLY
HBA2	0	0.299687	0.814	0.699	0	1	HBA2
TIMP1	2.89293e-144	0.297482	0.253	0.605	5.78587e-141	1	TIMP1
PNPLA2	0	0.292111	0.158	0.572	0	1	PNPLA2
CMTM2	2.48112e-109	0.289881	0.162	0.498	4.96224e-106	1	CMTM2
CST3	7.34757e-245	0.281446	0.846	0.868	1.46951e-241	1	CST3
IFITM3	4.17024e-93	0.279692	0.81	0.854	8.34047e-90	1	IFITM3
IGHG4	8.6481e-13	0.279679	0.368	0.499	1.72962e-09	1	IGHG4
S100A9	0	0.269882	1	1	0	1	S100A9
TRBC1	6.9383e-262	0.267698	0.132	0.526	1.38766e-258	1	TRBC1
MMP9	1.78062e-57	0.261071	0.343	0.65	3.56123e-54	1	MMP9
FCER1G	2.88543e-13	0.25606	0.639	0.774	5.77087e-10	1	FCER1G
TRAC	1.7088e-285	0.252577	0.139	0.538	3.4176e-282	1	TRAC
TRBC2	3.61324e-08	0.250299	0.198	0.428	7.22647e-05	1	TRBC2
SLC25A5	3.04086e-159	0.812198	0.622	0.274	6.08172e-156	2	SLC25A5		AML progenitor cell_SOX4 high
FCER1A	3.45325e-236	0.763428	0.631	0.287	6.90649e-233	2	FCER1A
PEBP1	0	0.752901	0.759	0.343	0	2	PEBP1
RPS7	0	0.740048	0.886	0.572	0	2	RPS7
CD74	0	0.706954	0.969	0.807	0	2	CD74
RPS2	3.99423e-190	0.689985	0.993	0.912	7.98846e-187	2	RPS2
SOX4	2.59319e-55	0.688047	0.331	0.237	5.18639e-52	2	SOX4
HLA-DPB1	6.97211e-303	0.68234	0.802	0.448	1.39442e-299	2	HLA-DPB1
RPS18	0	0.674331	0.99	0.859	0	2	RPS18
RPLP0	0	0.662309	0.981	0.765	0	2	RPLP0
EEF1B2	8.34673e-233	0.658224	0.81	0.515	1.66935e-229	2	EEF1B2
FAM30A	5.29975e-19	0.653192	0.375	0.253	1.05995e-15	2	FAM30A
BEX3	0.000366206	0.640442	0.36	0.161	0.732411	2	BEX3
HNRNPA1	2.05845e-136	0.63974	0.721	0.436	4.11691e-133	2	HNRNPA1
HSPE1	0.00374626	0.632383	0.42	0.196	1	2	HSPE1
HSPD1	2.32866e-273	0.618712	0.661	0.275	4.65732e-270	2	HSPD1
SPINK2	0.00799642	0.612916	0.412	0.184	1	2	SPINK2
HMGB1	1.03128e-146	0.60253	0.71	0.395	2.06257e-143	2	HMGB1
RPS21	0	0.600527	0.926	0.623	0	2	RPS21
HLA-DPA1	2.32086e-217	0.59817	0.812	0.471	4.64172e-214	2	HLA-DPA1
KIAA0101	0.000227172	0.594293	0.459	0.244	0.454345	2	KIAA0101
PPIA	7.53304e-116	0.594002	0.732	0.498	1.50661e-112	2	PPIA
RPSA	3.0267e-254	0.592221	0.872	0.524	6.05339e-251	2	RPSA
HOPX	3.62766e-73	0.590144	0.321	0.251	7.25532e-70	2	HOPX
PTMA	0	0.581148	0.983	0.826	0	2	PTMA
HSP90AB1	1.02256e-129	0.578678	0.646	0.338	2.04512e-126	2	HSP90AB1
RAN	8.03316e-53	0.564277	0.603	0.344	1.60663e-49	2	RAN
RPS29	0	0.560864	0.995	0.888	0	2	RPS29
NPM1	2.33934e-163	0.555797	0.83	0.589	4.67869e-160	2	NPM1
EGFL7	0	0.547424	0.646	0.217	0	2	EGFL7
ATP5G3	2.37555e-67	0.544564	0.663	0.42	4.7511e-64	2	ATP5G3
RPL7A	2.59089e-237	0.541455	0.909	0.688	5.18177e-234	2	RPL7A
FLT3	1.61721e-75	0.540882	0.305	0.189	3.23443e-72	2	FLT3
EEF1A1	1.20995e-292	0.54037	0.927	0.709	2.41989e-289	2	EEF1A1
RPL22L1	1.77864e-17	0.539745	0.351	0.194	3.55728e-14	2	RPL22L1
VPREB1	4.91716e-68	0.526008	0.292	0.158	9.83432e-65	2	VPREB1
HLA-DRB1	4.23946e-138	0.524355	0.803	0.494	8.47892e-135	2	HLA-DRB1
YBX1	0	0.521398	0.859	0.444	0	2	YBX1
ERH	0.000360398	0.51909	0.419	0.25	0.720796	2	ERH
HSP90AA1	0	0.518497	0.833	0.404	0	2	HSP90AA1
HPRT1	1.48694e-127	0.516877	0.532	0.202	2.97388e-124	2	HPRT1
IMPDH2	0	0.507266	0.669	0.293	0	2	IMPDH2
RPL24	1.10239e-203	0.504164	0.865	0.575	2.20479e-200	2	RPL24
SMIM24	3.32784e-108	0.499103	0.257	0.138	6.65569e-105	2	SMIM24
HLA-DMA	4.87272e-59	0.496683	0.558	0.296	9.74544e-56	2	HLA-DMA
LDHB	1.58012e-42	0.49351	0.653	0.468	3.16023e-39	2	LDHB
IGLL1	1.66512e-119	0.492075	0.508	0.182	3.33025e-116	2	IGLL1
NUDT5	1.07653e-22	0.49135	0.495	0.252	2.15307e-19	2	NUDT5
CKS1B	1.70471e-21	0.491322	0.32	0.143	3.40942e-18	2	CKS1B
RPL23	5.2621e-224	0.486539	0.897	0.644	1.05242e-220	2	RPL23
RPS27A	0	0.481207	0.99	0.861	0	2	RPS27A
RBBP7	0	0.477213	0.703	0.274	0	2	RBBP7
RPS25	4.54116e-290	0.476985	0.948	0.668	9.08233e-287	2	RPS25
CCT2	1.32826e-05	0.474206	0.473	0.271	0.0265652	2	CCT2
PAICS	2.49098e-134	0.472495	0.53	0.186	4.98196e-131	2	PAICS
RPS24	0	0.467876	0.975	0.804	0	2	RPS24
DNTT	1.85349e-60	0.465435	0.316	0.176	3.70698e-57	2	DNTT
UBE2C	6.73702e-132	0.461673	0.585	0.26	1.3474e-128	2	UBE2C
HMGA1	0	0.450823	0.729	0.32	0	2	HMGA1
RPL27	3.24449e-227	0.450203	0.924	0.685	6.48898e-224	2	RPL27
ANXA2	0	0.444159	0.814	0.432	0	2	ANXA2
TK1	6.38952e-181	0.439726	0.632	0.299	1.2779e-177	2	TK1
RPL38	1.69648e-193	0.438191	0.86	0.577	3.39296e-190	2	RPL38
EIF5A	0	0.437423	0.712	0.29	0	2	EIF5A
TMEM14B	7.83428e-242	0.436475	0.62	0.247	1.56686e-238	2	TMEM14B
ANP32B	4.18743e-222	0.431911	0.727	0.345	8.37486e-219	2	ANP32B
PA2G4	3.23122e-237	0.430627	0.681	0.331	6.46245e-234	2	PA2G4
MT-ATP8	3.9533e-19	0.428166	0.443	0.347	7.9066e-16	2	MT-ATP8
RPL31	0	0.427175	0.995	0.914	0	2	RPL31
RPLP1	0	0.426343	0.999	0.955	0	2	RPLP1
PSMA3	2.37954e-27	0.422148	0.348	0.218	4.75907e-24	2	PSMA3
MDK	1.00515e-105	0.421751	0.316	0.252	2.01031e-102	2	MDK
PDCD5	8.63744e-28	0.41478	0.349	0.214	1.72749e-24	2	PDCD5
NHP2	3.96861e-10	0.407144	0.514	0.303	7.93722e-07	2	NHP2
RPL26	2.52499e-232	0.406796	0.949	0.737	5.04999e-229	2	RPL26
CDCA7	3.33079e-148	0.40351	0.546	0.206	6.66158e-145	2	CDCA7
ITM2A	1.92902e-42	0.402097	0.31	0.17	3.85804e-39	2	ITM2A
PPA2	2.6864e-174	0.401766	0.589	0.261	5.3728e-171	2	PPA2
EEF1E1	0.00571117	0.399458	0.369	0.139	1	2	EEF1E1
RPL41	3.10892e-206	0.39648	0.902	0.624	6.21785e-203	2	RPL41
RPS13	1.74891e-217	0.394245	0.938	0.763	3.49781e-214	2	RPS13
CKS2	6.49636e-35	0.393635	0.318	0.178	1.29927e-31	2	CKS2
EBNA1BP2	0	0.392507	0.608	0.201	0	2	EBNA1BP2
CLEC2B	6.96678e-94	0.391981	0.307	0.247	1.39336e-90	2	CLEC2B
HLA-DRB6	1.62465e-173	0.390877	0.678	0.361	3.24931e-170	2	HLA-DRB6
SNRPE	2.92005e-06	0.388023	0.528	0.324	0.0058401	2	SNRPE
RPL37A	3.28201e-195	0.387662	0.941	0.736	6.56403e-192	2	RPL37A
RPL27A	2.61617e-280	0.382927	0.989	0.87	5.23234e-277	2	RPL27A
IRF8	0	0.382107	0.672	0.298	0	2	IRF8
SNRPB	5.023e-230	0.381139	0.76	0.409	1.0046e-226	2	SNRPB
PCNA	5.72243e-61	0.380151	0.569	0.291	1.14449e-57	2	PCNA
NOP58	1.02345e-203	0.3777	0.619	0.27	2.04691e-200	2	NOP58
DNPH1	0	0.377466	0.69	0.237	0	2	DNPH1
KCNE5	0	0.377086	0.643	0.254	0	2	KCNE5
TUBA1C	0	0.376085	0.712	0.323	0	2	TUBA1C
TUBA1B	8.21236e-88	0.375739	0.853	0.664	1.64247e-84	2	TUBA1B
CDK1	0	0.375417	0.643	0.215	0	2	CDK1
HLA-DRA	8.47512e-53	0.372819	0.826	0.686	1.69502e-49	2	HLA-DRA
DNAJC9	0	0.369063	0.661	0.272	0	2	DNAJC9
TCF4	4.09933e-52	0.365333	0.332	0.202	8.19866e-49	2	TCF4
BRIX1	0.000160042	0.364552	0.383	0.15	0.320083	2	BRIX1
MRPL1	1.37347e-29	0.362465	0.434	0.168	2.74695e-26	2	MRPL1
PSMA5	0.000103821	0.359111	0.426	0.264	0.207641	2	PSMA5
DDX18	3.9172e-73	0.358898	0.511	0.209	7.8344e-70	2	DDX18
CDK4	1.57185e-11	0.356173	0.475	0.258	3.14371e-08	2	CDK4
AKR1C3	3.77913e-125	0.355178	0.275	0.209	7.55826e-122	2	AKR1C3
NME1	9.32146e-47	0.354422	0.324	0.213	1.86429e-43	2	NME1
MAD2L1	1.08384e-11	0.350973	0.339	0.156	2.16769e-08	2	MAD2L1
RPS27	0	0.349383	0.999	0.964	0	2	RPS27
PPIB	1.75633e-71	0.347164	0.568	0.268	3.51266e-68	2	PPIB
TMPO	2.3931e-98	0.346334	0.52	0.209	4.78619e-95	2	TMPO
CENPH	0	0.346131	0.641	0.188	0	2	CENPH
MIR4458HG	4.82898e-228	0.344558	0.182	0.076	9.65796e-225	2	MIR4458HG
UBE2T	1.78882e-92	0.344455	0.268	0.164	3.57764e-89	2	UBE2T
PTTG1	2.20396e-13	0.343968	0.446	0.203	4.40792e-10	2	PTTG1
HLA-DQA1	0	0.341651	0.68	0.291	0	2	HLA-DQA1
NOP56	7.13448e-114	0.339718	0.571	0.275	1.4269e-110	2	NOP56
TUBB	1.29041e-58	0.338186	0.686	0.44	2.58082e-55	2	TUBB
RPL34	3.85281e-307	0.336923	0.999	0.964	7.70562e-304	2	RPL34
DUT	2.59456e-62	0.333559	0.624	0.349	5.18912e-59	2	DUT
RANBP1	2.27469e-229	0.331074	0.68	0.313	4.54938e-226	2	RANBP1
RPF2	9.60093e-31	0.33098	0.46	0.199	1.92019e-27	2	RPF2
COX6C	1.56195e-52	0.329326	0.651	0.359	3.12391e-49	2	COX6C
ARL6IP1	1.58821e-174	0.328855	0.603	0.253	3.17642e-171	2	ARL6IP1
NUCKS1	1.07231e-96	0.327657	0.58	0.269	2.14462e-93	2	NUCKS1
TYMS	4.64972e-230	0.327069	0.729	0.377	9.29943e-227	2	TYMS
TMEM14C	7.52817e-300	0.324675	0.647	0.263	1.50563e-296	2	TMEM14C
NDUFAF2	5.38502e-61	0.323379	0.513	0.234	1.077e-57	2	NDUFAF2
TPM4	1.17951e-110	0.322653	0.59	0.312	2.35902e-107	2	TPM4
HLA-DQB1	0	0.32206	0.747	0.365	0	2	HLA-DQB1
HEMGN	0.000157101	0.320024	0.41	0.18	0.314203	2	HEMGN
C12orf75	8.9135e-17	0.314332	0.406	0.289	1.7827e-13	2	C12orf75
METTL5	1.33519e-24	0.313907	0.346	0.206	2.67038e-21	2	METTL5
NOP16	8.736e-99	0.313442	0.514	0.197	1.7472e-95	2	NOP16
NCL	9.15358e-124	0.311846	0.643	0.327	1.83072e-120	2	NCL
SMC4	2.94472e-300	0.309805	0.666	0.267	5.88944e-297	2	SMC4
NUSAP1	0	0.306101	0.633	0.216	0	2	NUSAP1
RPS26	8.21336e-37	0.306034	0.694	0.493	1.64267e-33	2	RPS26
HDDC2	3.17803e-295	0.30102	0.654	0.306	6.35606e-292	2	HDDC2
MYC	1.64808e-173	0.29989	0.571	0.237	3.29615e-170	2	MYC
GGH	9.11044e-242	0.297827	0.588	0.2	1.82209e-238	2	GGH
DECR1	4.42862e-18	0.296891	0.496	0.26	8.85725e-15	2	DECR1
C11orf74	1.05536e-90	0.296279	0.295	0.193	2.11073e-87	2	C11orf74
HMGB2	7.20595e-61	0.292063	0.723	0.464	1.44119e-57	2	HMGB2
CYCS	1.73611e-37	0.288615	0.521	0.257	3.47221e-34	2	CYCS
FEN1	1.67927e-171	0.288393	0.559	0.208	3.35853e-168	2	FEN1
FAM212A	0	0.28218	0.633	0.194	0	2	FAM212A
HLA-DQA2	0	0.28126	0.729	0.258	0	2	HLA-DQA2
VDAC3	1.0282e-70	0.279664	0.553	0.269	2.0564e-67	2	VDAC3
PSMG1	1.82831e-59	0.278365	0.511	0.234	3.65662e-56	2	PSMG1
FABP5	1.93011e-237	0.277995	0.571	0.194	3.86022e-234	2	FABP5
ACY3	2.56006e-116	0.277455	0.529	0.209	5.12011e-113	2	ACY3
NDUFAB1	1.90542e-06	0.274801	0.478	0.258	0.00381084	2	NDUFAB1
ADK	9.90667e-50	0.274355	0.468	0.179	1.98133e-46	2	ADK
IL1B	3.24696e-281	0.273238	0.218	0.18	6.49392e-278	2	IL1B
ITM2C	2.24837e-74	0.272139	0.35	0.284	4.49674e-71	2	ITM2C
SNHG7	0	0.272119	0.673	0.303	0	2	SNHG7
LGALS1	1.50466e-20	0.271899	0.716	0.592	3.00933e-17	2	LGALS1
SERBP1	0	0.266426	0.68	0.261	0	2	SERBP1
MRPL14	1.90906e-67	0.264472	0.517	0.233	3.81812e-64	2	MRPL14
DERA	1.17827e-16	0.261562	0.454	0.204	2.35655e-13	2	DERA
ZWINT	2.41607e-195	0.260022	0.589	0.244	4.83213e-192	2	ZWINT
C19orf48	7.0806e-80	0.259776	0.523	0.229	1.41612e-76	2	C19orf48
CENPU	2.46596e-54	0.254295	0.493	0.201	4.93193e-51	2	CENPU
DTYMK	0	0.253502	0.687	0.283	0	2	DTYMK
GMNN	6.17241e-113	0.252601	0.541	0.224	1.23448e-109	2	GMNN
GAR1	3.69068e-40	0.252206	0.491	0.244	7.38135e-37	2	GAR1
MMP8	0	1.53833	0.726	0.551	0	3	MMP8		Neutrophil C
LTF	0	1.4033	0.971	0.92	0	3	LTF
ARG1	2.56111e-127	1.32338	0.531	0.445	5.12222e-124	3	ARG1
MMP9	3.50997e-105	1.27154	0.607	0.558	7.01994e-102	3	MMP9
CAMP	0	1.22924	0.955	0.927	0	3	CAMP
FCGR3B	2.93961e-50	1.11872	0.549	0.533	5.87922e-47	3	FCGR3B
CLC	3.40053e-46	1.10674	0.412	0.377	6.80105e-43	3	CLC
PLBD1	1.11143e-55	1.08305	0.476	0.44	2.22286e-52	3	PLBD1
TCN1	7.95588e-08	1.07819	0.362	0.394	0.000159118	3	TCN1
S100A12	0	1.07705	0.995	0.982	0	3	S100A12
PGLYRP1	0	1.07311	0.907	0.821	0	3	PGLYRP1
CHI3L1	5.45289e-50	1.03118	0.501	0.504	1.09058e-46	3	CHI3L1
HP	1.02651e-94	0.995792	0.621	0.577	2.05302e-91	3	HP
ANXA3	3.80128e-71	0.956487	0.553	0.495	7.60256e-68	3	ANXA3
CKAP4	5.95719e-21	0.93783	0.437	0.458	1.19144e-17	3	CKAP4
LCN2	8.52679e-34	0.920061	0.639	0.702	1.70536e-30	3	LCN2
FPR1	2.23019e-45	0.881123	0.56	0.546	4.46039e-42	3	FPR1
S100A8	0	0.867356	1	1	0	3	S100A8
S100P	7.7512e-112	0.864711	0.635	0.546	1.55024e-108	3	S100P
CDA	1.9024e-57	0.832852	0.604	0.59	3.8048e-54	3	CDA
CD177	9.15313e-21	0.825219	0.467	0.508	1.83063e-17	3	CD177
ALOX5	1.90979e-07	0.806864	0.4	0.451	0.000381959	3	ALOX5
CLEC4E	9.49715e-05	0.771727	0.371	0.427	0.189943	3	CLEC4E
CYSTM1	2.39827e-23	0.750632	0.529	0.548	4.79654e-20	3	CYSTM1
RGL4	4.33632e-09	0.669954	0.319	0.335	8.67263e-06	3	RGL4
FCN1	2.8527e-266	0.664497	0.923	0.852	5.70541e-263	3	FCN1
RETN	2.97577e-07	0.653238	0.297	0.34	0.000595153	3	RETN
ALOX5AP	1.6434e-127	0.643236	0.742	0.66	3.2868e-124	3	ALOX5AP
CHIT1	0.00228171	0.635089	0.299	0.413	1	3	CHIT1
VNN2	0.00550246	0.628036	0.4	0.469	1	3	VNN2
MNDA	1.86086e-142	0.615078	0.799	0.732	3.72173e-139	3	MNDA
CMTM2	3.64454e-24	0.612021	0.389	0.409	7.28907e-21	3	CMTM2
IFITM2	2.31702e-148	0.595406	0.903	0.862	4.63403e-145	3	IFITM2
P2RY13	2.75619e-14	0.584191	0.258	0.385	5.51239e-11	3	P2RY13
TNFAIP6	0.00660211	0.575825	0.364	0.44	1	3	TNFAIP6
TSPO	2.07463e-123	0.568795	0.823	0.778	4.14927e-120	3	TSPO
FOLR3	1.60132e-38	0.5582	0.291	0.261	3.20264e-35	3	FOLR3
RAB31	0.000664852	0.554144	0.395	0.499	1	3	RAB31
CD24	1.58578e-06	0.55223	0.482	0.527	0.00317156	3	CD24
RGS2	2.46093e-43	0.546206	0.412	0.367	4.92187e-40	3	RGS2
OLFM4	5.45229e-13	0.525353	0.104	0.219	1.09046e-09	3	OLFM4
FFAR2	0.00386513	0.520627	0.307	0.417	1	3	FFAR2
BASP1	2.45624e-36	0.505118	0.194	0.352	4.91248e-33	3	BASP1
TMSB4X	0	0.502775	1	0.998	0	3	TMSB4X
S100A9	0	0.460617	1	1	0	3	S100A9
S100A6	4.7502e-199	0.455628	0.963	0.924	9.5004e-196	3	S100A6
TFF3	3.93573e-46	0.440607	0.127	0.297	7.87146e-43	3	TFF3
HIST1H2AC	3.16846e-11	0.425577	0.295	0.31	6.33692e-08	3	HIST1H2AC
SERPINB10	5.62454e-06	0.412053	0.329	0.438	0.0112491	3	SERPINB10
PTAFR	3.70584e-20	0.402124	0.327	0.466	7.41168e-17	3	PTAFR
COL17A1	1.64805e-13	0.399555	0.248	0.255	3.29611e-10	3	COL17A1
DYSF	1.25292e-39	0.388913	0.252	0.419	2.50584e-36	3	DYSF
G0S2	1.79233e-39	0.387945	0.292	0.263	3.58467e-36	3	G0S2
C3AR1	2.90567e-14	0.386946	0.305	0.444	5.81133e-11	3	C3AR1
FAR2	5.78463e-05	0.385389	0.212	0.31	0.115693	3	FAR2
IL1RN	1.32562e-05	0.352562	0.289	0.41	0.0265124	3	IL1RN
CSTA	1.21822e-23	0.337136	0.67	0.675	2.43645e-20	3	CSTA
JAML	0.000111408	0.291652	0.367	0.482	0.222817	3	JAML
STX3	3.64202e-24	0.289932	0.226	0.367	7.28404e-21	3	STX3
CTB-61M7.2	3.16286e-12	0.285916	0.14	0.228	6.32572e-09	3	CTB-61M7.2
MANSC1	1.96638e-23	0.285574	0.207	0.343	3.93275e-20	3	MANSC1
GCLM	1.99833e-35	0.281048	0.236	0.389	3.99666e-32	3	GCLM
ID2	4.48069e-06	0.254308	0.339	0.446	0.00896138	3	ID2
CTSG	0	1.59696	0.826	0.48	0	4	CTSG		Neutrophil D
ELANE	0	1.57408	0.987	0.891	0	4	ELANE
SRGN	0	1.50198	1	0.947	0	4	SRGN
DEFA4	4.4053e-136	1.45739	0.84	0.687	8.81061e-133	4	DEFA4
PRTN3	0	1.42449	0.963	0.783	0	4	PRTN3
CST7	0	1.40361	0.82	0.516	0	4	CST7
RNASE3	0	1.39696	0.842	0.525	0	4	RNASE3
AZU1	0	1.33042	0.98	0.813	0	4	AZU1
CEACAM6	2.19907e-46	1.26032	0.499	0.24	4.39813e-43	4	CEACAM6
MS4A3	0	1.08779	0.773	0.371	0	4	MS4A3
DEFA3	5.57605e-148	1.08287	0.65	0.402	1.11521e-144	4	DEFA3
NUCB2	1.37076e-297	1.01248	0.793	0.38	2.74152e-294	4	NUCB2
BPI	1.30129e-161	0.99478	0.765	0.532	2.60259e-158	4	BPI
MPO	0	0.969934	0.959	0.823	0	4	MPO
SLPI	8.89821e-142	0.905824	0.675	0.392	1.77964e-138	4	SLPI
CLEC11A	3.22035e-185	0.857623	0.727	0.419	6.44071e-182	4	CLEC11A
RNASE2	1.68994e-250	0.830302	0.866	0.596	3.37987e-247	4	RNASE2
BEX1	5.34359e-117	0.828116	0.579	0.337	1.06872e-113	4	BEX1
RGL4	1.53613e-16	0.784524	0.492	0.307	3.07226e-13	4	RGL4
DEFA8P	2.56074e-48	0.709142	0.274	0.227	5.12148e-45	4	DEFA8P
COL17A1	2.01845e-36	0.655544	0.457	0.221	4.03691e-33	4	COL17A1
MGST1	2.01273e-24	0.653937	0.483	0.27	4.02546e-21	4	MGST1
RP11-84C10.2	0.00272174	0.644818	0.438	0.288	1	4	RP11-84C10.2
CD24	3.54285e-85	0.641046	0.713	0.49	7.08569e-82	4	CD24
CEACAM8	3.89444e-82	0.584297	0.686	0.454	7.78888e-79	4	CEACAM8
ALAS1	3.76041e-224	0.55179	0.629	0.31	7.52083e-221	4	ALAS1
NKG7	2.21195e-101	0.547469	0.796	0.561	4.42389e-98	4	NKG7
S100P	1.00692e-24	0.531977	0.653	0.544	2.01385e-21	4	S100P
GGTA1P	1.54056e-43	0.527183	0.542	0.367	3.08112e-40	4	GGTA1P
SERPINB10	2.72338e-264	0.515701	0.691	0.378	5.44676e-261	4	SERPINB10
DPY19L1P1	1.26922e-50	0.506933	0.421	0.194	2.53845e-47	4	DPY19L1P1
CSTA	6.17551e-98	0.491215	0.862	0.644	1.2351e-94	4	CSTA
IGFBP2	0	0.483496	0.665	0.33	0	4	IGFBP2
PIWIL4	1.85367e-07	0.461669	0.332	0.214	0.000370734	4	PIWIL4
RAB31	6.77713e-58	0.45888	0.662	0.455	1.35543e-54	4	RAB31
TSPO	2.06724e-44	0.395305	0.914	0.764	4.13449e-41	4	TSPO
ANXA3	3.13071e-23	0.393731	0.631	0.484	6.26142e-20	4	ANXA3
MARCKS	5.65314e-06	0.392496	0.314	0.186	0.0113063	4	MARCKS
PRSS57	2.99093e-17	0.374619	0.376	0.314	5.98186e-14	4	PRSS57
TESC	2.36226e-261	0.368204	0.693	0.395	4.72452e-258	4	TESC
MLC1	1.01013e-15	0.363134	0.336	0.255	2.02025e-12	4	MLC1
SPARC	0	0.349979	0.746	0.386	0	4	SPARC
CALR	4.28869e-07	0.345883	0.529	0.365	0.000857738	4	CALR
GSN	1.75284e-05	0.329991	0.515	0.378	0.0350568	4	GSN
HSPA5	0.000247357	0.329695	0.425	0.352	0.494714	4	HSPA5
TMSB4XP4	3.08289e-20	0.319396	0.437	0.21	6.16578e-17	4	TMSB4XP4
DUT	6.74776e-22	0.316877	0.584	0.388	1.34955e-18	4	DUT
RPL26	1.56161e-32	0.29202	0.898	0.77	3.12323e-29	4	RPL26
RPLP1	5.8492e-96	0.288674	0.993	0.961	1.16984e-92	4	RPLP1
GGH	2.57415e-09	0.286746	0.373	0.281	5.14829e-06	4	GGH
ATP8A1	2.94788e-80	0.282031	0.22	0.183	5.89577e-77	4	ATP8A1
TCTEX1D1	7.92789e-72	0.254353	0.467	0.2	1.58558e-68	4	TCTEX1D1
CD14	1.66718e-169	1.4038	0.666	0.516	3.33436e-166	5	CD14		Monocyte
CTSS	2.03446e-275	1.26798	0.87	0.699	4.06893e-272	5	CTSS
VCAN	1.48649e-41	1.16701	0.467	0.422	2.97297e-38	5	VCAN
CPVL	2.05957e-64	0.972772	0.587	0.509	4.11915e-61	5	CPVL
TNFSF10	3.08186e-41	0.95692	0.486	0.437	6.16371e-38	5	TNFSF10
MS4A6A	7.52333e-74	0.935353	0.633	0.555	1.50467e-70	5	MS4A6A
FGL2	1.85696e-51	0.928777	0.505	0.449	3.71392e-48	5	FGL2
PILRA	2.93553e-29	0.92782	0.419	0.403	5.87105e-26	5	PILRA
SAT1	1.08977e-93	0.866179	0.596	0.437	2.17954e-90	5	SAT1
GIMAP7	1.95617e-26	0.851472	0.394	0.375	3.91233e-23	5	GIMAP7
MAFB	7.09242e-31	0.84197	0.37	0.331	1.41848e-27	5	MAFB
RNF130	9.84037e-33	0.841553	0.492	0.459	1.96807e-29	5	RNF130
ANXA2	1.13363e-61	0.831433	0.603	0.516	2.26726e-58	5	ANXA2
MPEG1	1.79012e-28	0.816944	0.434	0.414	3.58024e-25	5	MPEG1
GIMAP4	3.47743e-30	0.793929	0.482	0.476	6.95486e-27	5	GIMAP4
MS4A7	2.74656e-19	0.786935	0.383	0.388	5.49311e-16	5	MS4A7
TGFBI	2.1738e-37	0.781422	0.406	0.36	4.3476e-34	5	TGFBI
CST3	1.91891e-186	0.779477	0.937	0.854	3.83782e-183	5	CST3
LGALS2	1.01177e-07	0.777552	0.391	0.413	0.000202353	5	LGALS2
LY96	8.29236e-18	0.761693	0.381	0.391	1.65847e-14	5	LY96
CTSB	5.85397e-32	0.719603	0.545	0.507	1.17079e-28	5	CTSB
FCGR3A	4.20794e-06	0.716131	0.312	0.427	0.00841588	5	FCGR3A
S100A10	2.30797e-93	0.698781	0.692	0.541	4.61595e-90	5	S100A10
DUSP1	2.43339e-28	0.698379	0.39	0.337	4.86679e-25	5	DUSP1
CD86	8.70384e-17	0.686618	0.378	0.39	1.74077e-13	5	CD86
HLA-DRB1	5.89982e-55	0.669383	0.64	0.561	1.17996e-51	5	HLA-DRB1
LPAR6	1.29878e-39	0.661698	0.351	0.289	2.59756e-36	5	LPAR6
S100A4	4.53581e-162	0.657186	0.889	0.763	9.07162e-159	5	S100A4
SAMHD1	5.99889e-19	0.644028	0.436	0.415	1.19978e-15	5	SAMHD1
CD36	1.61915e-05	0.637115	0.394	0.424	0.032383	5	CD36
TIMP1	6.34185e-24	0.629099	0.506	0.508	1.26837e-20	5	TIMP1
CD74	2.26016e-171	0.622208	0.939	0.837	4.52032e-168	5	CD74
SLC7A7	9.23972e-15	0.613225	0.373	0.401	1.84794e-11	5	SLC7A7
CFD	2.39606e-86	0.611469	0.755	0.687	4.79213e-83	5	CFD
CD68	3.01187e-22	0.604792	0.351	0.331	6.02374e-19	5	CD68
CD1D	7.41889e-21	0.60257	0.377	0.373	1.48378e-17	5	CD1D
FCN1	2.01179e-104	0.588316	0.904	0.858	4.02358e-101	5	FCN1
IFITM3	3.61654e-118	0.579485	0.895	0.836	7.23307e-115	5	IFITM3
HLA-DRB6	2.11058e-17	0.555231	0.438	0.437	4.22116e-14	5	HLA-DRB6
HLA-DMB	6.57048e-16	0.54897	0.397	0.389	1.3141e-12	5	HLA-DMB
SERPINA1	1.90151e-08	0.532509	0.481	0.51	3.80303e-05	5	SERPINA1
LGALS3	7.37179e-17	0.504328	0.495	0.516	1.47436e-13	5	LGALS3
CCL2	7.09999e-06	0.491787	0.257	0.339	0.0142	5	CCL2
LRRC25	7.01831e-07	0.488385	0.378	0.427	0.00140366	5	LRRC25
HLA-DRA	6.28767e-54	0.482863	0.775	0.714	1.25753e-50	5	HLA-DRA
RGS2	4.79494e-05	0.481187	0.357	0.376	0.0958988	5	RGS2
HLA-DPA1	1.2813e-14	0.476051	0.558	0.553	2.56261e-11	5	HLA-DPA1
CSF1R	3.80832e-05	0.473865	0.371	0.425	0.0761664	5	CSF1R
AHNAK	1.51347e-11	0.472299	0.256	0.364	3.02694e-08	5	AHNAK
WARS	0.00194469	0.465585	0.319	0.404	1	5	WARS
TMEM176B	0.000281759	0.456864	0.252	0.271	0.563518	5	TMEM176B
ZFP36L1	1.86251e-14	0.448405	0.224	0.338	3.72503e-11	5	ZFP36L1
CXCL10	3.27696e-40	0.447756	0.149	0.27	6.55393e-37	5	CXCL10
HLA-DQB1	6.70095e-07	0.440583	0.423	0.46	0.00134019	5	HLA-DQB1
IFIT2	0.00541535	0.436905	0.329	0.38	1	5	IFIT2
FCER1G	2.20675e-46	0.430706	0.784	0.732	4.41349e-43	5	FCER1G
KCTD12	1.85452e-16	0.430011	0.205	0.329	3.70903e-13	5	KCTD12
CD300E	1.22549e-37	0.427574	0.307	0.237	2.45098e-34	5	CD300E
B2M	9.11161e-301	0.424094	1	0.999	1.82232e-297	5	B2M
FTH1	2.68285e-68	0.42409	0.91	0.868	5.36571e-65	5	FTH1
LILRB1	1.34523e-07	0.423129	0.313	0.318	0.000269046	5	LILRB1
IFIT1	1.89986e-10	0.41898	0.426	0.44	3.79971e-07	5	IFIT1
C10orf54	2.07121e-13	0.406039	0.512	0.548	4.14243e-10	5	C10orf54
HLA-DPB1	1.34129e-14	0.405413	0.536	0.533	2.68258e-11	5	HLA-DPB1
FN1	4.72344e-08	0.386045	0.32	0.323	9.44688e-05	5	FN1
SMCO4	2.7222e-06	0.381261	0.317	0.338	0.0054444	5	SMCO4
CAPN2	5.37861e-05	0.365479	0.355	0.398	0.107572	5	CAPN2
LINC01272	3.38979e-05	0.35446	0.268	0.374	0.0677958	5	LINC01272
ASGR2	1.56389e-08	0.343862	0.258	0.334	3.12779e-05	5	ASGR2
S100A6	1.78523e-95	0.320334	0.978	0.925	3.57045e-92	5	S100A6
IFI27	4.47543e-06	0.301609	0.261	0.357	0.00895086	5	IFI27
FPR1	0.000247221	0.293079	0.495	0.553	0.494442	5	FPR1
CYBB	2.83674e-10	0.288679	0.426	0.438	5.67347e-07	5	CYBB
ISG15	5.16141e-17	0.287524	0.726	0.714	1.03228e-13	5	ISG15
CYP1B1	1.29482e-23	0.286252	0.295	0.25	2.58963e-20	5	CYP1B1
ALDH1A1	0.00100592	0.279753	0.326	0.366	1	5	ALDH1A1
SCIMP	8.86209e-05	0.275105	0.229	0.276	0.177242	5	SCIMP
BTG1	2.13101e-08	0.27167	0.54	0.575	4.26202e-05	5	BTG1
SIGLEC9	2.46704e-07	0.259001	0.266	0.376	0.000493408	5	SIGLEC9
RNF13	4.84293e-05	0.250368	0.298	0.332	0.0968587	5	RNF13
HBB	0	2.56753	1	0.981	0	6	HBB		Erythroid cell
HBA2	3.80405e-239	2.39941	0.989	0.722	7.6081e-236	6	HBA2
HBA1	1.25711e-293	2.32271	0.998	0.802	2.51421e-290	6	HBA1
AHSP	0	2.32242	0.985	0.488	0	6	AHSP
CA1	4.31609e-196	2.20903	0.802	0.285	8.63217e-193	6	CA1
BLVRB	2.71325e-268	2.03362	0.965	0.528	5.4265e-265	6	BLVRB
HBM	2.68464e-109	1.96589	0.681	0.26	5.36928e-106	6	HBM
PRDX2	2.44551e-273	1.96343	0.943	0.386	4.89102e-270	6	PRDX2
TMEM14C	1.04165e-244	1.88832	0.892	0.337	2.0833e-241	6	TMEM14C
SLC4A1	1.08427e-50	1.70586	0.564	0.274	2.16854e-47	6	SLC4A1
GYPA	1.44749e-103	1.69714	0.652	0.24	2.89499e-100	6	GYPA
UROD	2.62943e-178	1.63649	0.859	0.383	5.25886e-175	6	UROD
HMBS	2.52062e-153	1.63438	0.767	0.366	5.04125e-150	6	HMBS
CA2	2.57324e-109	1.56841	0.674	0.28	5.14648e-106	6	CA2
ALAS2	1.12076e-53	1.52583	0.588	0.327	2.24152e-50	6	ALAS2
GYPB	3.37597e-55	1.49644	0.529	0.105	6.75193e-52	6	GYPB
RHAG	1.77459e-66	1.34355	0.592	0.262	3.54917e-63	6	RHAG
TMEM14B	1.76387e-89	1.30881	0.714	0.324	3.52775e-86	6	TMEM14B
SLC25A37	4.50351e-53	1.25842	0.608	0.32	9.00702e-50	6	SLC25A37
SLC25A39	5.77248e-174	1.25276	0.782	0.356	1.1545e-170	6	SLC25A39
HEMGN	1.24685e-41	1.24086	0.56	0.225	2.49371e-38	6	HEMGN
HBD	4.90624e-123	1.22622	0.689	0.163	9.81248e-120	6	HBD
HSPD1	7.72292e-169	1.21027	0.846	0.352	1.54458e-165	6	HSPD1
CD36	5.43168e-69	1.1043	0.701	0.411	1.08634e-65	6	CD36
RAN	1.03555e-119	1.08628	0.857	0.391	2.07111e-116	6	RAN
IFI27	3.03931e-60	1.08374	0.648	0.338	6.07862e-57	6	IFI27
ATPIF1	1.91551e-111	1.08328	0.859	0.438	3.83102e-108	6	ATPIF1
MINPP1	3.31809e-170	1.08237	0.723	0.282	6.63618e-167	6	MINPP1
REXO2	3.32043e-56	1.06846	0.652	0.318	6.64085e-53	6	REXO2
RFESD	1.68375e-05	1.06553	0.432	0.202	0.0336749	6	RFESD
NME4	1.19169e-160	1.06372	0.806	0.363	2.38338e-157	6	NME4
KLF1	5.88068e-204	1.05779	0.775	0.355	1.17614e-200	6	KLF1
MGST3	4.22208e-76	1.03708	0.714	0.283	8.44416e-73	6	MGST3
KCNH2	1.52689e-176	1.01502	0.74	0.351	3.05379e-173	6	KCNH2
AKR1C3	4.63966e-94	1.01182	0.643	0.211	9.27932e-91	6	AKR1C3
FECH	5.07089e-120	0.993265	0.681	0.317	1.01418e-116	6	FECH
UROS	1.53252e-43	0.98887	0.59	0.343	3.06504e-40	6	UROS
TUBG1	3.34045e-122	0.988249	0.681	0.296	6.6809e-119	6	TUBG1
RHCE	1.94419e-87	0.987704	0.592	0.252	3.88839e-84	6	RHCE
PVT1	6.04987e-68	0.978804	0.625	0.343	1.20997e-64	6	PVT1
LMNA	1.75076e-181	0.949519	0.769	0.375	3.50152e-178	6	LMNA
HEBP1	6.33253e-68	0.944549	0.667	0.348	1.26651e-64	6	HEBP1
YBX1	7.89025e-100	0.919309	0.89	0.532	1.57805e-96	6	YBX1
H1F0	5.58374e-68	0.915608	0.652	0.34	1.11675e-64	6	H1F0
BOLA3	1.37662e-14	0.915247	0.493	0.24	2.75324e-11	6	BOLA3
CCT2	5.17712e-158	0.9124	0.789	0.304	1.03542e-154	6	CCT2
TK1	4.69727e-128	0.910352	0.756	0.367	9.39455e-125	6	TK1
GYPC	1.53389e-32	0.910225	0.632	0.333	3.06778e-29	6	GYPC
ANP32B	3.40922e-116	0.907875	0.864	0.423	6.81844e-113	6	ANP32B
TFRC	3.67872e-54	0.90621	0.562	0.194	7.35744e-51	6	TFRC
CCNB2	1.03857e-103	0.896125	0.692	0.309	2.07714e-100	6	CCNB2
LINC01133	5.77353e-11	0.89154	0.449	0.23	1.15471e-07	6	LINC01133
GFI1B	2.71654e-38	0.888415	0.542	0.241	5.43308e-35	6	GFI1B
FAM178B	3.32282e-91	0.885441	0.679	0.35	6.64563e-88	6	FAM178B
TUBB	2.49368e-105	0.882955	0.903	0.485	4.98735e-102	6	TUBB
DNAJC9	9.00532e-102	0.87815	0.711	0.354	1.80106e-98	6	DNAJC9
APOC1	0.000168603	0.86902	0.467	0.311	0.337207	6	APOC1
OAT	8.54297e-30	0.867724	0.531	0.274	1.70859e-26	6	OAT
KIAA0101	4.31265e-31	0.866414	0.617	0.285	8.62531e-28	6	KIAA0101
RAD23A	7.71262e-90	0.864682	0.668	0.303	1.54252e-86	6	RAD23A
HMGA1	2.78551e-136	0.862752	0.833	0.404	5.57102e-133	6	HMGA1
UBAC1	0.0056294	0.862426	0.452	0.339	1	6	UBAC1
FBXO7	0.000131828	0.860691	0.485	0.351	0.263655	6	FBXO7
SNRPB	7.3092e-107	0.859421	0.848	0.481	1.46184e-103	6	SNRPB
SNRPE	4.61441e-89	0.859294	0.813	0.358	9.22882e-86	6	SNRPE
TUBB4B	3.3037e-141	0.850426	0.817	0.45	6.6074e-138	6	TUBB4B
HSP90AA1	2.18427e-60	0.84768	0.804	0.497	4.36854e-57	6	HSP90AA1
HSPE1	2.45803e-33	0.846329	0.595	0.239	4.91606e-30	6	HSPE1
SOD1	2.70671e-49	0.841171	0.701	0.351	5.41343e-46	6	SOD1
MPC2	2.93035e-41	0.829054	0.667	0.392	5.86071e-38	6	MPC2
RRM2	2.84287e-116	0.817319	0.744	0.365	5.68574e-113	6	RRM2
DECR1	4.48068e-107	0.812401	0.727	0.303	8.96136e-104	6	DECR1
EIF5A	8.23435e-134	0.807937	0.786	0.378	1.64687e-130	6	EIF5A
SMIM1	2.81795e-17	0.802734	0.308	0.326	5.6359e-14	6	SMIM1
DTYMK	4.15208e-64	0.802551	0.676	0.37	8.30416e-61	6	DTYMK
HBQ1	1.15841e-06	0.802437	0.454	0.277	0.00231683	6	HBQ1
RPSA	5.18999e-73	0.802234	0.923	0.597	1.038e-69	6	RPSA
PA2G4	1.20156e-107	0.801048	0.788	0.403	2.40313e-104	6	PA2G4
FEN1	1.46987e-97	0.787314	0.658	0.28	2.93975e-94	6	FEN1
MRPL35	1.6599e-139	0.786818	0.694	0.259	3.31979e-136	6	MRPL35
CPOX	5.68829e-50	0.785295	0.538	0.224	1.13766e-46	6	CPOX
ALAD	2.19251e-20	0.782288	0.546	0.354	4.38501e-17	6	ALAD
METAP2	3.39889e-20	0.777128	0.562	0.345	6.79777e-17	6	METAP2
HMGB2	9.35758e-69	0.774221	0.852	0.515	1.87152e-65	6	HMGB2
PTTG1	5.07919e-20	0.772873	0.531	0.252	1.01584e-16	6	PTTG1
EPB42	6.15746e-13	0.763135	0.493	0.325	1.23149e-09	6	EPB42
GATA1	7.43374e-32	0.754409	0.533	0.295	1.48675e-28	6	GATA1
MYL4	1.17015e-10	0.754	0.485	0.343	2.3403e-07	6	MYL4
TUBA1C	1.39723e-138	0.748904	0.802	0.403	2.79446e-135	6	TUBA1C
PCNA	1.18905e-46	0.741975	0.69	0.347	2.3781e-43	6	PCNA
MRPS9	4.03997e-50	0.739509	0.597	0.31	8.07993e-47	6	MRPS9
EIF2AK1	7.58216e-105	0.732764	0.663	0.304	1.51643e-101	6	EIF2AK1
RPS26	7.60821e-68	0.726671	0.852	0.531	1.52164e-64	6	RPS26
SNCA	2.53554e-07	0.725281	0.321	0.252	0.000507107	6	SNCA
TUBA1B	1.29493e-89	0.718613	0.965	0.701	2.58985e-86	6	TUBA1B
CYC1	3.33454e-112	0.717625	0.791	0.442	6.66908e-109	6	CYC1
RPS21	2.67119e-79	0.717317	0.923	0.688	5.34238e-76	6	RPS21
GMNN	2.65748e-22	0.717218	0.518	0.293	5.31495e-19	6	GMNN
SLC38A5	1.75656e-138	0.709464	0.687	0.298	3.51311e-135	6	SLC38A5
CDK1	4.87016e-38	0.707109	0.575	0.309	9.74031e-35	6	CDK1
HMGB1	2.4573e-49	0.704574	0.799	0.46	4.9146e-46	6	HMGB1
SRI	1.73518e-26	0.698736	0.584	0.28	3.47035e-23	6	SRI
FKBP4	4.06233e-111	0.697457	0.707	0.365	8.12466e-108	6	FKBP4
CYCS	9.54886e-70	0.697354	0.687	0.308	1.90977e-66	6	CYCS
RPL7A	9.48695e-61	0.69051	0.956	0.734	1.89739e-57	6	RPL7A
CDKN3	1.85314e-23	0.688674	0.575	0.347	3.70628e-20	6	CDKN3
NOP58	3.03191e-48	0.683553	0.665	0.343	6.06383e-45	6	NOP58
COPS3	7.03769e-77	0.677005	0.648	0.285	1.40754e-73	6	COPS3
NARF	2.84122e-78	0.675346	0.674	0.356	5.68244e-75	6	NARF
CDC20	1.21625e-47	0.674234	0.612	0.353	2.43251e-44	6	CDC20
EEF1B2	7.50217e-62	0.673933	0.912	0.575	1.50043e-58	6	EEF1B2
HAGH	9.62513e-76	0.668982	0.617	0.311	1.92503e-72	6	HAGH
ATP5G3	4.44476e-50	0.666158	0.788	0.467	8.88951e-47	6	ATP5G3
MRPL14	2.04523e-52	0.662018	0.612	0.291	4.09046e-49	6	MRPL14
RANBP1	3.1336e-46	0.659644	0.696	0.391	6.2672e-43	6	RANBP1
CHAC2	1.76211e-41	0.658864	0.516	0.217	3.52423e-38	6	CHAC2
SMC4	5.32453e-81	0.658097	0.705	0.351	1.06491e-77	6	SMC4
EPCAM	9.96364e-115	0.655531	0.625	0.237	1.99273e-111	6	EPCAM
ST6GALNAC4	1.42441e-125	0.653563	0.683	0.338	2.84881e-122	6	ST6GALNAC4
SLIRP	3.54782e-50	0.64957	0.698	0.287	7.09565e-47	6	SLIRP
TPGS2	5.81268e-36	0.640374	0.586	0.318	1.16254e-32	6	TPGS2
HIST1H4C	1.4647e-20	0.640052	0.538	0.341	2.92939e-17	6	HIST1H4C
HSPA8	6.20918e-18	0.627937	0.667	0.474	1.24184e-14	6	HSPA8
RPL24	1.23905e-70	0.625766	0.94	0.634	2.47809e-67	6	RPL24
ANK1	0.000126925	0.624189	0.407	0.21	0.25385	6	ANK1
ECI2	3.22038e-07	0.622195	0.452	0.251	0.000644076	6	ECI2
GADD45GIP1	8.97755e-54	0.62046	0.701	0.391	1.79551e-50	6	GADD45GIP1
DNAJA4	2.02388e-12	0.619786	0.447	0.243	4.04775e-09	6	DNAJA4
DUT	2.01821e-55	0.619721	0.756	0.404	4.03642e-52	6	DUT
RBBP7	1.11551e-70	0.616533	0.698	0.367	2.23101e-67	6	RBBP7
PTMS	6.00946e-90	0.613259	0.656	0.37	1.20189e-86	6	PTMS
HSP90AB1	1.35717e-68	0.605963	0.784	0.4	2.71434e-65	6	HSP90AB1
ASF1A	7.25911e-41	0.604039	0.577	0.282	1.45182e-37	6	ASF1A
E2F4	2.04307e-104	0.603791	0.681	0.318	4.08614e-101	6	E2F4
GAR1	5.51244e-116	0.603179	0.683	0.29	1.10249e-112	6	GAR1
UCP2	4.29405e-72	0.602531	0.777	0.451	8.5881e-69	6	UCP2
TAF9	0.000168486	0.598604	0.469	0.263	0.336972	6	TAF9
EBNA1BP2	5.91466e-67	0.597465	0.636	0.288	1.18293e-63	6	EBNA1BP2
PAICS	9.24184e-51	0.593569	0.595	0.258	1.84837e-47	6	PAICS
SLC2A1	1.32038e-46	0.592808	0.54	0.275	2.64076e-43	6	SLC2A1
HES6	1.94564e-132	0.591151	0.637	0.248	3.89127e-129	6	HES6
DDX1	8.94345e-84	0.591039	0.647	0.293	1.78869e-80	6	DDX1
TRAP1	2.43608e-93	0.588227	0.676	0.343	4.87216e-90	6	TRAP1
CAST	2.24316e-23	0.585513	0.562	0.356	4.48631e-20	6	CAST
ODC1	2.33297e-90	0.584332	0.681	0.339	4.66593e-87	6	ODC1
RRM1	1.64934e-18	0.576284	0.463	0.216	3.29869e-15	6	RRM1
NCL	4.16036e-111	0.568628	0.8	0.39	8.32071e-108	6	NCL
BIRC5	3.35946e-39	0.565597	0.542	0.255	6.71892e-36	6	BIRC5
ADD2	1.56809e-10	0.55757	0.445	0.244	3.13618e-07	6	ADD2
UBE2C	0.000125762	0.556541	0.478	0.333	0.251524	6	UBE2C
RFC4	3.53668e-14	0.555546	0.478	0.244	7.07337e-11	6	RFC4
RPLP0	2.65705e-70	0.554355	0.987	0.811	5.31409e-67	6	RPLP0
COX6C	3.98285e-33	0.553779	0.734	0.419	7.96571e-30	6	COX6C
NHP2	8.24965e-21	0.551561	0.579	0.346	1.64993e-17	6	NHP2
RPL38	1.05434e-48	0.541636	0.903	0.637	2.10868e-45	6	RPL38
MT1E	4.6389e-143	0.535693	0.701	0.345	9.2778e-140	6	MT1E
SSSCA1	3.39406e-14	0.531231	0.518	0.321	6.78812e-11	6	SSSCA1
STRADB	1.16643e-26	0.530429	0.52	0.293	2.33285e-23	6	STRADB
MRPL1	1.00196e-10	0.529671	0.449	0.224	2.00393e-07	6	MRPL1
SLC29A1	1.35886e-48	0.527115	0.573	0.317	2.71772e-45	6	SLC29A1
ZWINT	2.77549e-30	0.523578	0.56	0.319	5.55099e-27	6	ZWINT
CCT6A	0.00124415	0.523442	0.513	0.373	1	6	CCT6A
PSMA5	5.75086e-69	0.523174	0.656	0.291	1.15017e-65	6	PSMA5
UBE2T	3.0201e-08	0.518814	0.293	0.185	6.0402e-05	6	UBE2T
GCLM	1.77853e-17	0.518421	0.537	0.36	3.55705e-14	6	GCLM
MCM7	4.57261e-99	0.517466	0.749	0.382	9.14521e-96	6	MCM7
DANCR	5.4834e-24	0.516265	0.548	0.316	1.09668e-20	6	DANCR
AMMECR1	4.83591e-28	0.515447	0.478	0.203	9.67182e-25	6	AMMECR1
PAK1IP1	8.43473e-52	0.514343	0.559	0.279	1.68695e-48	6	PAK1IP1
RPL27	1.47071e-53	0.512507	0.952	0.736	2.94142e-50	6	RPL27
MRPS34	5.36954e-64	0.508636	0.716	0.395	1.07391e-60	6	MRPS34
PSMB5	1.77327e-30	0.508544	0.584	0.317	3.54655e-27	6	PSMB5
PCCB	3.25953e-29	0.506257	0.557	0.316	6.51905e-26	6	PCCB
PLEK2	4.94181e-157	0.502576	0.665	0.296	9.88362e-154	6	PLEK2
TFR2	1.33823e-116	0.496788	0.59	0.195	2.67647e-113	6	TFR2
CKS1B	3.84303e-05	0.496039	0.385	0.179	0.0768607	6	CKS1B
SERBP1	2.95371e-32	0.486675	0.643	0.352	5.90742e-29	6	SERBP1
CACYBP	4.00021e-41	0.486212	0.623	0.291	8.00041e-38	6	CACYBP
RPL22L1	3.34556e-26	0.485303	0.516	0.222	6.69111e-23	6	RPL22L1
NUCKS1	2.65598e-102	0.484785	0.738	0.331	5.31196e-99	6	NUCKS1
DDX39A	2.20211e-29	0.48409	0.641	0.383	4.40422e-26	6	DDX39A
PIR	8.40746e-126	0.482749	0.625	0.248	1.68149e-122	6	PIR
ACKR1	4.36008e-80	0.480408	0.548	0.218	8.72015e-77	6	ACKR1
TESC	6.86801e-94	0.474356	0.738	0.426	1.3736e-90	6	TESC
PHB	1.23599e-22	0.469512	0.603	0.36	2.47198e-19	6	PHB
MRPL17	1.29434e-106	0.467557	0.654	0.265	2.58868e-103	6	MRPL17
HTRA2	2.31376e-05	0.46404	0.372	0.349	0.0462752	6	HTRA2
SMIM5	3.44351e-40	0.463803	0.505	0.231	6.88703e-37	6	SMIM5
C19orf48	0.00381146	0.462118	0.456	0.294	1	6	C19orf48
FTH1	1.33075e-57	0.460616	0.978	0.869	2.6615e-54	6	FTH1
RPF2	6.65784e-25	0.458416	0.509	0.253	1.33157e-21	6	RPF2
PSMA3	2.35059e-07	0.455872	0.467	0.242	0.000470117	6	PSMA3
TPM1	0.00450976	0.452956	0.392	0.215	1	6	TPM1
RPL23	3.77559e-22	0.450861	0.894	0.699	7.55119e-19	6	RPL23
U2SURP	2.82222e-40	0.450792	0.56	0.261	5.64444e-37	6	U2SURP
EPRS	2.25732e-05	0.4501	0.339	0.282	0.0451464	6	EPRS
PPT2	4.78858e-185	0.449614	0.661	0.195	9.57715e-182	6	PPT2
FAH	4.32389e-121	0.449439	0.69	0.329	8.64777e-118	6	FAH
PPA2	2.22716e-09	0.444805	0.516	0.334	4.45431e-06	6	PPA2
WDR34	5.55217e-124	0.443137	0.681	0.318	1.11043e-120	6	WDR34
HACD3	1.24363e-20	0.440306	0.487	0.249	2.48727e-17	6	HACD3
RUVBL2	1.64601e-23	0.439939	0.604	0.377	3.29202e-20	6	RUVBL2
NOP16	5.08594e-52	0.434227	0.582	0.263	1.01719e-48	6	NOP16
ARL6IP1	0.0012184	0.432991	0.471	0.332	1	6	ARL6IP1
NPM1	1.74495e-25	0.432956	0.861	0.64	3.48991e-22	6	NPM1
PYCR1	7.62923e-122	0.432949	0.614	0.209	1.52585e-118	6	PYCR1
TMEM56	1.11604e-17	0.43245	0.277	0.251	2.23208e-14	6	TMEM56
RPL41	1.13926e-29	0.4318	0.912	0.683	2.27851e-26	6	RPL41
SLC25A5	7.72179e-16	0.428173	0.606	0.349	1.54436e-12	6	SLC25A5
PPIA	3.59427e-35	0.424981	0.864	0.544	7.18854e-32	6	PPIA
MAD2L1	9.66712e-09	0.424051	0.419	0.193	1.93342e-05	6	MAD2L1
FADS2	6.96794e-22	0.423805	0.458	0.192	1.39359e-18	6	FADS2
ZMYND8	3.36063e-05	0.422706	0.381	0.209	0.0672127	6	ZMYND8
METTL5	2.4465e-05	0.421172	0.432	0.233	0.04893	6	METTL5
PRPF19	2.27413e-103	0.419315	0.674	0.302	4.54827e-100	6	PRPF19
KPNA2	5.22756e-05	0.418071	0.484	0.345	0.104551	6	KPNA2
SLC43A3	2.17541e-59	0.417603	0.623	0.328	4.35083e-56	6	SLC43A3
HPRT1	5.07835e-69	0.415366	0.65	0.269	1.01567e-65	6	HPRT1
ATP5C1	8.47892e-05	0.412638	0.491	0.291	0.169578	6	ATP5C1
TSPAN17	1.43976e-56	0.410864	0.59	0.33	2.87951e-53	6	TSPAN17
MLLT3	3.65417e-29	0.407386	0.524	0.274	7.30833e-26	6	MLLT3
CDK4	2.49832e-88	0.405838	0.672	0.298	4.99663e-85	6	CDK4
MRPL39	6.91041e-06	0.405325	0.403	0.204	0.0138208	6	MRPL39
FAM83D	2.31843e-35	0.403619	0.526	0.275	4.63686e-32	6	FAM83D
PEBP1	2.63374e-51	0.402212	0.76	0.432	5.26747e-48	6	PEBP1
TUBB2A	4.46782e-152	0.401389	0.623	0.178	8.93565e-149	6	TUBB2A
ERH	2.38021e-11	0.400931	0.526	0.283	4.76041e-08	6	ERH
TSPAN13	1.54707e-41	0.394694	0.535	0.252	3.09414e-38	6	TSPAN13
MPST	7.21943e-113	0.39459	0.718	0.404	1.44389e-109	6	MPST
LDHB	1.07488e-28	0.392569	0.795	0.503	2.14977e-25	6	LDHB
HMGB3	0.00656718	0.392063	0.339	0.231	1	6	HMGB3
ATP5G1	0.0034703	0.390969	0.473	0.258	1	6	ATP5G1
H2AFX	4.07588e-128	0.388936	0.698	0.334	8.15175e-125	6	H2AFX
CENPV	1.18712e-171	0.38832	0.668	0.253	2.37425e-168	6	CENPV
VDAC3	0.00057765	0.387062	0.394	0.335	1	6	VDAC3
CCT3	3.39026e-16	0.384869	0.582	0.355	6.78053e-13	6	CCT3
SNRNP25	3.82687e-09	0.384679	0.495	0.33	7.65374e-06	6	SNRNP25
NOP56	1.93301e-64	0.378291	0.661	0.335	3.86601e-61	6	NOP56
CPVL	2.97151e-51	0.377519	0.764	0.508	5.94301e-48	6	CPVL
PSMD14	3.83423e-35	0.376501	0.562	0.272	7.66846e-32	6	PSMD14
CKS2	7.97515e-09	0.370801	0.482	0.202	1.59503e-05	6	CKS2
CR1L	2.86334e-49	0.368795	0.17	0.098	5.72669e-46	6	CR1L
RMDN3	4.58088e-28	0.36711	0.513	0.294	9.16177e-25	6	RMDN3
EEF1E1	6.00456e-13	0.366304	0.438	0.186	1.20091e-09	6	EEF1E1
COMMD4	2.22574e-40	0.364918	0.63	0.379	4.45148e-37	6	COMMD4
MRPL3	7.68391e-37	0.362735	0.603	0.323	1.53678e-33	6	MRPL3
SRM	2.27877e-98	0.36084	0.711	0.374	4.55754e-95	6	SRM
DKC1	2.59152e-15	0.360633	0.515	0.305	5.18304e-12	6	DKC1
NDUFAF2	2.48066e-32	0.35333	0.568	0.292	4.96133e-29	6	NDUFAF2
ATIC	1.80058e-66	0.352546	0.603	0.278	3.60116e-63	6	ATIC
RRP7A	1.79796e-06	0.351356	0.484	0.333	0.00359593	6	RRP7A
FHL2	1.7457e-17	0.349895	0.452	0.19	3.49139e-14	6	FHL2
POLE2	6.44119e-69	0.346802	0.564	0.237	1.28824e-65	6	POLE2
KEL	7.85255e-135	0.345074	0.614	0.223	1.57051e-131	6	KEL
AURKB	4.0908e-113	0.342294	0.696	0.347	8.18159e-110	6	AURKB
PSMC4	1.59345e-75	0.340461	0.652	0.322	3.18689e-72	6	PSMC4
RUVBL1	2.32073e-127	0.337644	0.69	0.31	4.64146e-124	6	RUVBL1
NME1	2.03452e-16	0.336675	0.507	0.23	4.06903e-13	6	NME1
TYMS	3.27511e-47	0.335197	0.762	0.452	6.55022e-44	6	TYMS
GINS2	3.22333e-12	0.33389	0.471	0.262	6.44666e-09	6	GINS2
CRLS1	2.98306e-58	0.333613	0.599	0.349	5.96611e-55	6	CRLS1
RPS27A	1.19002e-30	0.331572	0.965	0.889	2.38004e-27	6	RPS27A
SLC39A8	2.68758e-100	0.327547	0.645	0.3	5.37516e-97	6	SLC39A8
CTSL	4.98765e-09	0.327004	0.463	0.297	9.9753e-06	6	CTSL
MIR144	1.11273e-45	0.32686	0.484	0.183	2.22545e-42	6	MIR144
C11orf74	3.06456e-33	0.325896	0.491	0.208	6.12912e-30	6	C11orf74
HSF1	3.77888e-107	0.322425	0.687	0.362	7.55775e-104	6	HSF1
AP2B1	9.92083e-07	0.321999	0.361	0.316	0.00198417	6	AP2B1
DDX18	0.000894241	0.320307	0.359	0.279	1	6	DDX18
C1orf35	1.29269e-110	0.317106	0.661	0.317	2.58538e-107	6	C1orf35
MT1L	3.64799e-130	0.315652	0.608	0.207	7.29598e-127	6	MT1L
PDAP1	6.18351e-19	0.315441	0.586	0.379	1.2367e-15	6	PDAP1
UCA1	1.21923e-195	0.315102	0.617	0.158	2.43846e-192	6	UCA1
PPME1	0.00628763	0.312306	0.423	0.293	1	6	PPME1
GMPR	2.89817e-40	0.310867	0.511	0.221	5.79634e-37	6	GMPR
XK	2.25223e-06	0.310482	0.363	0.089	0.00450446	6	XK
CA3	5.75332e-44	0.310011	0.168	0.109	1.15066e-40	6	CA3
CCNA2	1.34637e-11	0.309435	0.495	0.304	2.69275e-08	6	CCNA2
ARV1	4.69032e-19	0.306563	0.291	0.305	9.38064e-16	6	ARV1
TYMSOS	2.63786e-85	0.303199	0.586	0.226	5.27572e-82	6	TYMSOS
APOBEC3C	8.15242e-10	0.300596	0.511	0.309	1.63048e-06	6	APOBEC3C
RPS25	2.01461e-20	0.29983	0.905	0.73	4.02922e-17	6	RPS25
DSN1	1.32263e-70	0.299806	0.562	0.227	2.64526e-67	6	DSN1
FAM13A	2.23585e-66	0.29491	0.167	0.169	4.4717e-63	6	FAM13A
RPS2	9.88226e-14	0.294858	0.989	0.93	1.97645e-10	6	RPS2
PES1	7.47383e-30	0.292959	0.59	0.363	1.49477e-26	6	PES1
BPGM	2.27866e-18	0.29227	0.201	0.207	4.55731e-15	6	BPGM
MYC	9.19054e-55	0.292095	0.623	0.307	1.83811e-51	6	MYC
GPATCH4	1.4621e-08	0.290794	0.341	0.31	2.9242e-05	6	GPATCH4
PCK2	3.25251e-31	0.29061	0.515	0.245	6.50502e-28	6	PCK2
PTMA	3.44216e-29	0.289117	0.971	0.86	6.88432e-26	6	PTMA
RPS13	4.59809e-19	0.288371	0.943	0.8	9.19617e-16	6	RPS13
MCM2	1.87644e-30	0.287424	0.513	0.253	3.75288e-27	6	MCM2
C2orf88	3.64639e-48	0.286753	0.513	0.2	7.29278e-45	6	C2orf88
MFSD2B	4.18466e-35	0.285302	0.476	0.169	8.36932e-32	6	MFSD2B
RPS24	4.72457e-22	0.285075	0.971	0.841	9.44914e-19	6	RPS24
NUF2	3.67424e-10	0.284357	0.299	0.263	7.34849e-07	6	NUF2
CCDC25	1.05356e-18	0.280724	0.498	0.28	2.10713e-15	6	CCDC25
RPS7	5.24861e-21	0.276913	0.868	0.64	1.04972e-17	6	RPS7
HMMR	1.75204e-09	0.276391	0.443	0.232	3.50408e-06	6	HMMR
RPL27A	5.1888e-26	0.273793	0.987	0.896	1.03776e-22	6	RPL27A
C1QBP	9.63091e-32	0.272677	0.63	0.422	1.92618e-28	6	C1QBP
DTL	2.71159e-160	0.272261	0.639	0.194	5.42318e-157	6	DTL
PLK1	1.27887e-07	0.267564	0.324	0.271	0.000255775	6	PLK1
IMPDH2	1.12901e-30	0.265741	0.639	0.375	2.25801e-27	6	IMPDH2
ACSL6	1.33217e-17	0.264506	0.335	0.172	2.66435e-14	6	ACSL6
MIS18A	3.9329e-23	0.25976	0.471	0.204	7.86581e-20	6	MIS18A
TMPO	1.11501e-11	0.25787	0.478	0.277	2.23001e-08	6	TMPO
PSMD9	5.18285e-15	0.256334	0.484	0.294	1.03657e-11	6	PSMD9
TWISTNB	1.81885e-46	0.253759	0.582	0.294	3.6377e-43	6	TWISTNB
PXMP4	8.58987e-50	0.250581	0.548	0.267	1.71797e-46	6	PXMP4
CCL5	5.43192e-46	2.13124	0.599	0.457	1.08638e-42	7	CCL5		T cell
GNLY	2.11656e-06	2.0213	0.431	0.421	0.00423312	7	GNLY
GZMA	1.0685e-35	1.9895	0.535	0.403	2.13701e-32	7	GZMA
GZMK	4.06926e-24	1.68386	0.475	0.384	8.13853e-21	7	GZMK
TRAC	5.58675e-40	1.64096	0.562	0.425	1.11735e-36	7	TRAC
IL32	4.87465e-35	1.6378	0.525	0.385	9.74929e-32	7	IL32
TRBC1	4.78145e-17	1.49291	0.473	0.416	9.5629e-14	7	TRBC1
TRBC2	2.5681e-53	1.46463	0.594	0.359	5.13619e-50	7	TRBC2
CD3D	6.39158e-19	1.45864	0.47	0.386	1.27832e-15	7	CD3D
CD2	3.54577e-15	1.29051	0.421	0.355	7.09153e-12	7	CD2
FGFBP2	7.28635e-07	1.24521	0.334	0.296	0.00145727	7	FGFBP2
CCL4	4.09389e-06	1.22184	0.277	0.233	0.00818778	7	CCL4
MYOM2	5.0059e-12	1.18427	0.364	0.298	1.00118e-08	7	MYOM2
LCK	8.27887e-16	1.1152	0.436	0.369	1.65577e-12	7	LCK
KLRD1	9.15526e-11	1.10999	0.369	0.316	1.83105e-07	7	KLRD1
TRDC	0.000397179	1.09093	0.327	0.3	0.794357	7	TRDC
CD52	3.23312e-47	1.07508	0.733	0.561	6.46624e-44	7	CD52
GIMAP4	4.98006e-13	1.05307	0.505	0.476	9.96012e-10	7	GIMAP4
PRF1	2.77203e-09	1.03577	0.379	0.353	5.54407e-06	7	PRF1
GIMAP7	1.46214e-05	0.991605	0.386	0.377	0.0292428	7	GIMAP7
CD3G	9.26618e-12	0.94981	0.339	0.245	1.85324e-08	7	CD3G
EVL	5.95184e-16	0.9173	0.458	0.407	1.19037e-12	7	EVL
CD7	8.24502e-06	0.91716	0.376	0.39	0.01649	7	CD7
LTB	6.2776e-08	0.904527	0.495	0.487	0.000125552	7	LTB
ARL4C	9.50479e-07	0.827331	0.309	0.263	0.00190096	7	ARL4C
GPR183	3.46009e-25	0.786963	0.369	0.252	6.92018e-22	7	GPR183
ISG20	1.325e-06	0.766362	0.421	0.403	0.00265001	7	ISG20
DENND2D	1.79358e-09	0.764976	0.361	0.344	3.58715e-06	7	DENND2D
SH2D1A	1.04593e-05	0.757807	0.257	0.215	0.0209185	7	SH2D1A
AES	3.62859e-11	0.756379	0.376	0.322	7.25719e-08	7	AES
NKG7	3.58713e-20	0.750781	0.693	0.591	7.17427e-17	7	NKG7
GZMM	0.0078394	0.726519	0.302	0.306	1	7	GZMM
C12orf75	6.33662e-13	0.714506	0.371	0.316	1.26732e-09	7	C12orf75
FCMR	3.37727e-05	0.686791	0.322	0.321	0.0675454	7	FCMR
ITM2A	8.36257e-07	0.661811	0.25	0.202	0.00167251	7	ITM2A
CLDND1	1.2173e-13	0.618571	0.332	0.274	2.4346e-10	7	CLDND1
SPON2	0.00109448	0.610311	0.21	0.267	1	7	SPON2
TRGC2	7.83235e-07	0.602541	0.28	0.244	0.00156647	7	TRGC2
CD8B	5.58875e-05	0.594409	0.205	0.268	0.111775	7	CD8B
FCGR3A	0.000181048	0.587986	0.295	0.419	0.362095	7	FCGR3A
CX3CR1	0.00144844	0.585495	0.319	0.326	1	7	CX3CR1
IL2RB	5.25574e-07	0.581889	0.2	0.303	0.00105115	7	IL2RB
ANXA2	8.96949e-05	0.580418	0.52	0.524	0.17939	7	ANXA2
MT1E	5.6465e-16	0.578611	0.198	0.36	1.1293e-12	7	MT1E
TIMD4	4.22274e-15	0.572945	0.255	0.163	8.44547e-12	7	TIMD4
CLEC2D	5.63875e-10	0.56808	0.319	0.278	1.12775e-06	7	CLEC2D
AAK1	0.000105052	0.567734	0.324	0.338	0.210105	7	AAK1
MT2A	5.84428e-06	0.567207	0.547	0.552	0.0116886	7	MT2A
TMSB4X	2.24541e-79	0.537009	1	0.999	4.49082e-76	7	TMSB4X
S100A10	1.45837e-06	0.530244	0.579	0.555	0.00291674	7	S100A10
TPM4	0.00162332	0.523133	0.351	0.38	1	7	TPM4
PRKCH	2.81122e-06	0.51746	0.317	0.299	0.00562244	7	PRKCH
CHI3L2	5.49459e-21	0.505102	0.29	0.171	1.09892e-17	7	CHI3L2
DECR1	5.5062e-09	0.505049	0.366	0.315	1.10124e-05	7	DECR1
UCP2	3.11955e-06	0.497304	0.463	0.462	0.0062391	7	UCP2
ID3	0.00735079	0.49164	0.304	0.33	1	7	ID3
B2M	2.01452e-98	0.472816	1	0.999	4.02904e-95	7	B2M
BTG1	0.00412828	0.468281	0.572	0.571	1	7	BTG1
S1PR1	1.06436e-10	0.466162	0.302	0.23	2.12873e-07	7	S1PR1
DRAP1	5.2688e-06	0.434791	0.386	0.355	0.0105376	7	DRAP1
STAT4	2.77599e-16	0.432331	0.28	0.183	5.55199e-13	7	STAT4
SOD1	2.36675e-09	0.412294	0.433	0.361	4.73351e-06	7	SOD1
ISG15	1.23472e-07	0.404079	0.72	0.715	0.000246944	7	ISG15
KLRG1	0.00217213	0.395666	0.267	0.245	1	7	KLRG1
SUB1	7.86517e-06	0.384737	0.498	0.458	0.0157303	7	SUB1
COX6C	1.4161e-06	0.376833	0.468	0.428	0.00283221	7	COX6C
PYHIN1	5.60219e-08	0.375313	0.168	0.232	0.000112044	7	PYHIN1
GBP1	3.30719e-09	0.362289	0.233	0.382	6.61439e-06	7	GBP1
RPS27	1.31517e-30	0.341807	0.988	0.972	2.63034e-27	7	RPS27
CSNK1D	8.43285e-05	0.33776	0.282	0.385	0.168657	7	CSNK1D
XCL2	9.44495e-37	0.337026	0.262	0.096	1.88899e-33	7	XCL2
MAD2L1	5.09466e-09	0.332814	0.24	0.199	1.01893e-05	7	MAD2L1
TRAT1	8.82471e-09	0.300263	0.114	0.205	1.76494e-05	7	TRAT1
TSC22D3	6.71556e-06	0.280348	0.25	0.242	0.0134311	7	TSC22D3
RINL	1.8679e-16	0.280077	0.267	0.199	3.7358e-13	7	RINL
BIRC3	0.00198215	0.279368	0.24	0.251	1	7	BIRC3
PPIB	2.55619e-09	0.274023	0.401	0.339	5.11238e-06	7	PPIB
RPS26	1.59436e-07	0.273681	0.624	0.539	0.000318872	7	RPS26
SLAMF7	3.11073e-12	0.272078	0.146	0.286	6.22146e-09	7	SLAMF7
PPIA	0.000103552	0.267574	0.601	0.553	0.207104	7	PPIA
NUF2	0.00527359	0.262622	0.262	0.264	1	7	NUF2
RUVBL1	0.00251377	0.257023	0.218	0.325	1	7	RUVBL1
IGHG1	2.67432e-68	4.01324	0.765	0.419	5.34863e-65	8	IGHG1		B cell
IGHG2	1.43462e-111	4.00515	0.784	0.375	2.86924e-108	8	IGHG2
JCHAIN	1.66557e-155	3.93597	0.923	0.376	3.33113e-152	8	JCHAIN
IGHA2	2.28364e-98	3.78992	0.915	0.55	4.56728e-95	8	IGHA2
IGLC2	1.66817e-06	3.60144	0.669	0.62	0.00333634	8	IGLC2
IGHA1	3.84678e-46	3.24595	0.97	0.838	7.69357e-43	8	IGHA1
IGHG3	1.97037e-06	3.07617	0.492	0.266	0.00394075	8	IGHG3
IGKC	8.63258e-74	3.04609	0.973	0.943	1.72652e-70	8	IGKC
IGHG4	1.292e-17	2.79838	0.626	0.46	2.584e-14	8	IGHG4
IGLL5	1.05769e-06	2.37792	0.511	0.324	0.00211539	8	IGLL5
MZB1	1.13891e-140	2.26075	0.852	0.252	2.27782e-137	8	MZB1
IGHGP	4.58977e-14	2.00124	0.325	0.286	9.17954e-11	8	IGHGP
IGLV6-57	4.9396e-34	1.65872	0.213	0.048	9.8792e-31	8	IGLV6-57
HERPUD1	1.4063e-37	1.65782	0.678	0.381	2.81259e-34	8	HERPUD1
IGHD	1.09869e-07	1.61407	0.27	0.105	0.000219738	8	IGHD
HSP90B1	2.01537e-74	1.60682	0.792	0.346	4.03074e-71	8	HSP90B1
SEC11C	7.88273e-76	1.55525	0.751	0.304	1.57655e-72	8	SEC11C
CD79A	8.90719e-176	1.45227	0.852	0.375	1.78144e-172	8	CD79A
FKBP11	5.93608e-37	1.43762	0.59	0.16	1.18722e-33	8	FKBP11
DERL3	2.49347e-34	1.39575	0.626	0.296	4.98693e-31	8	DERL3
IGKV4-1	3.10131e-80	1.37252	0.186	0.203	6.20263e-77	8	IGKV4-1
IGKV3-20	2.13312e-191	1.28063	0.806	0.284	4.26624e-188	8	IGKV3-20
XBP1	2.9331e-16	1.25951	0.62	0.387	5.86621e-13	8	XBP1
SUB1	3.03338e-32	1.05221	0.773	0.452	6.06676e-29	8	SUB1
PPIB	1.80724e-33	1.04606	0.697	0.332	3.61447e-30	8	PPIB
IGLV2-8	6.68916e-113	1.03268	0.716	0.33	1.33783e-109	8	IGLV2-8
MANF	1.41654e-10	1.02494	0.544	0.297	2.83307e-07	8	MANF
CD38	1.17876e-25	0.956159	0.574	0.225	2.35751e-22	8	CD38
IGKV3-11	4.42856e-146	0.900259	0.73	0.229	8.85713e-143	8	IGKV3-11
PLPP5	2.88641e-14	0.845441	0.298	0.208	5.77282e-11	8	PLPP5
TPD52	1.63061e-16	0.836643	0.303	0.186	3.26122e-13	8	TPD52
IGLV8-61	2.00141e-133	0.816203	0.743	0.323	4.00282e-130	8	IGLV8-61
ISG20	0.00987599	0.801853	0.533	0.4	1	8	ISG20
BIRC3	2.56624e-51	0.743994	0.21	0.252	5.13249e-48	8	BIRC3
IGKV3-15	0	0.688085	0.762	0.093	0	8	IGKV3-15
SLAMF7	5.58723e-42	0.682747	0.251	0.284	1.11745e-38	8	SLAMF7
PRDX4	6.52607e-06	0.676829	0.525	0.321	0.0130521	8	PRDX4
SELM	0.000644749	0.672667	0.391	0.1	1	8	SELM
CRELD2	3.80926e-93	0.663533	0.751	0.364	7.61851e-90	8	CRELD2
PIM2	3.36371e-31	0.661004	0.273	0.243	6.72742e-28	8	PIM2
ITM2C	3.52508e-05	0.656386	0.527	0.295	0.0705016	8	ITM2C
IGLV10-54	9.73065e-180	0.635718	0.708	0.216	1.94613e-176	8	IGLV10-54
IRF4	1.84033e-70	0.608577	0.587	0.139	3.68065e-67	8	IRF4
AL928768.3	8.49728e-64	0.549602	0.202	0.138	1.69946e-60	8	AL928768.3
IGLV2-14	1.04402e-178	0.508611	0.724	0.187	2.08803e-175	8	IGLV2-14
CPNE5	3.14077e-59	0.498035	0.574	0.11	6.28155e-56	8	CPNE5
ANKRD36BP2	0.00883167	0.480745	0.443	0.188	1	8	ANKRD36BP2
IGLV2-23	4.5008e-95	0.462412	0.678	0.281	9.0016e-92	8	IGLV2-23
ANKRD37	4.54832e-207	0.454243	0.784	0.224	9.09664e-204	8	ANKRD37
CLEC2D	2.13537e-107	0.444904	0.749	0.269	4.27074e-104	8	CLEC2D
IGLV3-1	2.6026e-106	0.443039	0.137	0.211	5.2052e-103	8	IGLV3-1
VPREB3	1.38589e-10	0.440562	0.298	0.096	2.77178e-07	8	VPREB3
FAM30A	6.34179e-72	0.440235	0.743	0.272	1.26836e-68	8	FAM30A
RPS18	0.00163813	0.43943	0.986	0.888	1	8	RPS18
IGLV3-25	1.29967e-52	0.414131	0.183	0.174	2.59935e-49	8	IGLV3-25
FAM92B	4.20603e-18	0.40958	0.246	0.001	8.41205e-15	8	FAM92B
IGLV3-19	2.16592e-42	0.402002	0.26	0.197	4.33184e-39	8	IGLV3-19
UAP1	1.27826e-70	0.401449	0.142	0.214	2.55652e-67	8	UAP1
MEI1	5.53656e-42	0.398047	0.235	0.207	1.10731e-38	8	MEI1
DANCR	2.51347e-92	0.367049	0.762	0.314	5.02694e-89	8	DANCR
SPAG4	1.24998e-66	0.362812	0.172	0.029	2.49996e-63	8	SPAG4
IGKV1-5	2.49523e-42	0.357606	0.536	0.238	4.99046e-39	8	IGKV1-5
NDUFAB1	1.82555e-52	0.351256	0.77	0.301	3.6511e-49	8	NDUFAB1
FAM69A	2.09067e-96	0.337359	0.598	0.19	4.18134e-93	8	FAM69A
PSMA3	1.45834e-30	0.333389	0.628	0.241	2.91668e-27	8	PSMA3
APOBEC3G	1.22413e-83	0.330128	0.735	0.329	2.44826e-80	8	APOBEC3G
RPLP0	0.000758814	0.328466	0.964	0.814	1	8	RPLP0
IGHV3-49	1.40147e-147	0.323473	0.73	0.247	2.80295e-144	8	IGHV3-49
IGKV2-30	1.74142e-209	0.315052	0.765	0.222	3.48283e-206	8	IGKV2-30
IGLV1-40	1.17821e-93	0.311746	0.552	0.193	2.35642e-90	8	IGLV1-40
IGHV3-7	0	0.300394	0.735	0.039	0	8	IGHV3-7
PERP	1.11286e-238	0.300007	0.757	0.165	2.22573e-235	8	PERP
IGLV2-11	1.4829e-161	0.283157	0.071	0.197	2.9658e-158	8	IGLV2-11
SMUG1	3.1697e-120	0.282239	0.781	0.3	6.33939e-117	8	SMUG1
DDX18	2.19201e-11	0.280032	0.579	0.275	4.38402e-08	8	DDX18
IRF8	1.28297e-32	1.94018	0.676	0.382	2.56595e-29	9	IRF8		AML progenitor cell_IRF8 high
SERPINF1	1.16296e-15	1.45821	0.512	0.254	2.32593e-12	9	SERPINF1
TCF4	7.64049e-79	1.44498	0.67	0.224	1.5281e-75	9	TCF4
PLD4	6.97166e-11	1.41253	0.559	0.373	1.39433e-07	9	PLD4
NAPSB	1.34401e-81	1.12527	0.744	0.391	2.68801e-78	9	NAPSB
TSPAN13	2.74891e-22	1.09246	0.546	0.256	5.49781e-19	9	TSPAN13
CD74	4.35847e-100	1.04562	1	0.843	8.71693e-97	9	CD74
RASD1	1.40375e-49	1.02628	0.642	0.301	2.80749e-46	9	RASD1
LILRA4	2.8745e-05	1.02323	0.37	0.328	0.0574901	9	LILRA4
UCP2	3.78282e-53	0.938634	0.772	0.456	7.56565e-50	9	UCP2
SCT	1.47792e-13	0.920587	0.475	0.226	2.95584e-10	9	SCT
FCER1A	7.06027e-09	0.912266	0.534	0.367	1.41205e-05	9	FCER1A
TGFBI	3.15025e-92	0.898161	0.741	0.357	6.3005e-89	9	TGFBI
ITM2C	5.69189e-21	0.886501	0.583	0.294	1.13838e-17	9	ITM2C
GZMB	2.02855e-06	0.833734	0.327	0.314	0.00405709	9	GZMB
MPEG1	1.11935e-09	0.824789	0.574	0.413	2.23871e-06	9	MPEG1
HLA-DPB1	2.61218e-41	0.791273	0.827	0.527	5.22436e-38	9	HLA-DPB1
CLEC4C	1.87118e-11	0.788126	0.262	0.151	3.74236e-08	9	CLEC4C
HLA-DMB	3.74022e-29	0.786989	0.645	0.384	7.48044e-26	9	HLA-DMB
MIR155HG	2.94551e-17	0.75085	0.235	0.173	5.89102e-14	9	MIR155HG
HLA-DRB1	4.22473e-34	0.745865	0.84	0.563	8.44945e-31	9	HLA-DRB1
IL3RA	1.17576e-23	0.734496	0.216	0.186	2.35151e-20	9	IL3RA
LGMN	2.8331e-57	0.732663	0.636	0.29	5.6662e-54	9	LGMN
HLA-DQA2	1.4754e-75	0.728175	0.698	0.365	2.9508e-72	9	HLA-DQA2
C12orf75	0.00374582	0.722887	0.466	0.315	1	9	C12orf75
HERPUD1	5.50662e-18	0.699583	0.642	0.383	1.10132e-14	9	HERPUD1
BLNK	8.42943e-08	0.687801	0.478	0.25	0.000168589	9	BLNK
MZB1	3.80559e-07	0.677308	0.472	0.261	0.000761118	9	MZB1
HLA-DRA	1.36019e-40	0.674322	0.92	0.716	2.72038e-37	9	HLA-DRA
CTSB	2.32091e-41	0.631462	0.756	0.505	4.64182e-38	9	CTSB
PPP1R14B	4.12993e-10	0.623576	0.253	0.212	8.25986e-07	9	PPP1R14B
NUDT5	1.19485e-22	0.597921	0.583	0.305	2.3897e-19	9	NUDT5
HLA-DQB1	2.39405e-26	0.596017	0.707	0.452	4.78809e-23	9	HLA-DQB1
PTMA	9.53975e-15	0.57302	0.963	0.861	1.90795e-11	9	PTMA
HLA-DQA1	1.16278e-06	0.551415	0.525	0.382	0.00232555	9	HLA-DQA1
SUB1	6.93847e-09	0.531491	0.636	0.455	1.38769e-05	9	SUB1
FTH1	1.34386e-13	0.531386	0.96	0.871	2.68772e-10	9	FTH1
JAML	2.29614e-21	0.516977	0.698	0.46	4.59229e-18	9	JAML
SAMHD1	1.91582e-49	0.513474	0.725	0.411	3.83164e-46	9	SAMHD1
GPR183	7.99879e-38	0.511832	0.17	0.257	1.59976e-34	9	GPR183
HSP90B1	8.65667e-29	0.496951	0.694	0.349	1.73133e-25	9	HSP90B1
HLA-DPA1	0.00597033	0.486982	0.664	0.551	1	9	HLA-DPA1
SMIM5	7.07081e-06	0.486544	0.318	0.238	0.0141416	9	SMIM5
EEF1A1	3.26042e-27	0.476462	0.904	0.758	6.52085e-24	9	EEF1A1
SERBP1	2.55547e-43	0.470231	0.691	0.355	5.11094e-40	9	SERBP1
FAM30A	4.11997e-07	0.469878	0.278	0.283	0.000823994	9	FAM30A
DERL3	0.000498903	0.467467	0.472	0.3	0.997806	9	DERL3
SOX4	0.000147044	0.46267	0.299	0.259	0.294088	9	SOX4
DANCR	3.42441e-36	0.461993	0.627	0.318	6.84883e-33	9	DANCR
CST3	0.000320797	0.455609	0.935	0.86	0.641595	9	CST3
KIF17	2.96422e-61	0.445533	0.623	0.266	5.92844e-58	9	KIF17
RP1-244F24.1	7.92598e-17	0.443146	0.448	0.147	1.5852e-13	9	RP1-244F24.1
N4BP2L1	1.44601e-07	0.432921	0.475	0.274	0.000289202	9	N4BP2L1
RPS27	3.22932e-50	0.432225	1	0.972	6.45864e-47	9	RPS27
LYSMD2	4.11545e-15	0.427665	0.617	0.401	8.2309e-12	9	LYSMD2
IGHM	2.67725e-38	0.412702	0.694	0.379	5.35451e-35	9	IGHM
PEBP1	3.31532e-10	0.403557	0.651	0.439	6.63064e-07	9	PEBP1
SEC11C	8.47163e-33	0.402826	0.639	0.308	1.69433e-29	9	SEC11C
C11orf74	9.52925e-16	0.400432	0.216	0.217	1.90585e-12	9	C11orf74
FCRLA	3.43012e-20	0.399208	0.506	0.217	6.86025e-17	9	FCRLA
IGFBP3	0	0.393315	0.531	0.042	0	9	IGFBP3
SLFN11	1.72305e-08	0.39091	0.417	0.176	3.44609e-05	9	SLFN11
ID3	1.35327e-66	0.389219	0.645	0.323	2.70654e-63	9	ID3
HSP90AB1	4.91051e-26	0.387679	0.713	0.406	9.82102e-23	9	HSP90AB1
ACY3	2.65244e-23	0.381909	0.256	0.286	5.30489e-20	9	ACY3
C18orf8	2.95531e-14	0.371911	0.525	0.268	5.91062e-11	9	C18orf8
CLEC2B	1.61235e-09	0.364573	0.262	0.262	3.22471e-06	9	CLEC2B
S100A10	0.00416317	0.352978	0.66	0.553	1	9	S100A10
ERH	5.0298e-19	0.3502	0.574	0.285	1.00596e-15	9	ERH
MYDGF	8.24121e-18	0.342633	0.62	0.35	1.64824e-14	9	MYDGF
DNASE1L3	2.04092e-65	0.341979	0.136	0.155	4.08184e-62	9	DNASE1L3
RPL41	4.50112e-12	0.339463	0.83	0.688	9.00224e-09	9	RPL41
CCT2	0.000393192	0.338698	0.485	0.316	0.786384	9	CCT2
HOPX	9.53305e-16	0.337684	0.225	0.269	1.90661e-12	9	HOPX
DDOST	2.94008e-44	0.327993	0.66	0.374	5.88015e-41	9	DDOST
RPS2	3.16186e-05	0.327102	0.985	0.931	0.0632372	9	RPS2
LTB	4.6753e-18	0.323314	0.735	0.482	9.3506e-15	9	LTB
RPSA	1.6681e-08	0.323011	0.796	0.604	3.33619e-05	9	RPSA
DRAP1	2.13906e-06	0.320524	0.549	0.352	0.00427811	9	DRAP1
LXN	2.26692e-06	0.318153	0.469	0.263	0.00453385	9	LXN
PMPCB	0.00132651	0.316267	0.485	0.31	1	9	PMPCB
HLA-DRB6	0.000450464	0.315664	0.583	0.435	0.900928	9	HLA-DRB6
CCT6A	2.7765e-28	0.312651	0.667	0.372	5.55301e-25	9	CCT6A
DIMT1	0.000916398	0.310403	0.472	0.284	1	9	DIMT1
TMEM14B	1.66598e-15	0.306569	0.29	0.337	3.33195e-12	9	TMEM14B
PPIA	5.5354e-05	0.304071	0.701	0.552	0.110708	9	PPIA
LPXN	5.21378e-05	0.296934	0.389	0.347	0.104276	9	LPXN
HDDC2	5.62053e-26	0.296532	0.664	0.384	1.12411e-22	9	HDDC2
LAMP5	1.46957e-97	0.294913	0.66	0.268	2.93914e-94	9	LAMP5
STAMBPL1	9.84526e-80	0.288265	0.654	0.224	1.96905e-76	9	STAMBPL1
SMUG1	1.08828e-22	0.288211	0.577	0.305	2.17655e-19	9	SMUG1
SEMA4D	5.63994e-12	0.287751	0.478	0.256	1.12799e-08	9	SEMA4D
VPREB1	1.28925e-43	0.286689	0.111	0.192	2.57851e-40	9	VPREB1
CLDND1	6.24646e-05	0.286473	0.333	0.275	0.124929	9	CLDND1
SNHG7	5.05953e-08	0.28557	0.608	0.388	0.000101191	9	SNHG7
RPS29	5.69624e-21	0.28344	0.997	0.912	1.13925e-17	9	RPS29
METTL10	2.80098e-28	0.282996	0.537	0.225	5.60197e-25	9	METTL10
SP110	7.96314e-11	0.282276	0.265	0.262	1.59263e-07	9	SP110
RPS25	7.80118e-14	0.278975	0.929	0.732	1.56024e-10	9	RPS25
NHP2	0.000195357	0.278357	0.522	0.35	0.390714	9	NHP2
RMDN3	0.00215168	0.27788	0.466	0.298	1	9	RMDN3
NPM1	9.04162e-05	0.276923	0.762	0.645	0.180832	9	NPM1
FCER1G	2.32027e-05	0.275653	0.858	0.734	0.0464053	9	FCER1G
STXBP3	5.73822e-51	0.273732	0.63	0.29	1.14764e-47	9	STXBP3
ISG15	8.21003e-07	0.272905	0.858	0.713	0.00164201	9	ISG15
METTL5	2.19092e-12	0.272299	0.222	0.24	4.38183e-09	9	METTL5
RPL24	3.10314e-07	0.270325	0.79	0.641	0.000620627	9	RPL24
RPF2	2.90034e-11	0.269423	0.488	0.257	5.80068e-08	9	RPF2
BOLA3	1.34326e-27	0.26861	0.552	0.243	2.68652e-24	9	BOLA3
RPS21	1.09812e-10	0.266097	0.867	0.692	2.19625e-07	9	RPS21
RUVBL1	6.01691e-19	0.265618	0.565	0.318	1.20338e-15	9	RUVBL1
FUZ	8.44363e-07	0.265087	0.423	0.191	0.00168873	9	FUZ
DRD4	0	0.264011	0.293	0.003	0	9	DRD4
B2M	1.9184e-29	0.261228	1	0.999	3.83681e-26	9	B2M
STAMBP	1.21773e-50	0.260353	0.645	0.317	2.43546e-47	9	STAMBP
BTK	4.10946e-34	0.259887	0.627	0.314	8.21892e-31	9	BTK
EIF2AK4	0.00177674	0.257914	0.494	0.363	1	9	EIF2AK4
NDUFAB1	1.27317e-12	0.255182	0.552	0.306	2.54634e-09	9	NDUFAB1
PRMT6	1.68689e-42	0.253533	0.623	0.28	3.37378e-39	9	PRMT6
HMHB1	3.73514e-161	0.250513	0.602	0.116	7.47027e-158	9	HMHB1
